# Supplementary material for: Limited effects of long-term daily cranberry consumption on the gut microbiome in a placebo-controlled study of women with recurrent urinary tract infections
Source: Springer Nature journal article supplement (doi:10.1186/s12866-021-02106-4), 2021-02-18

# Figure S6

A.

Allele 183G 183A 183T

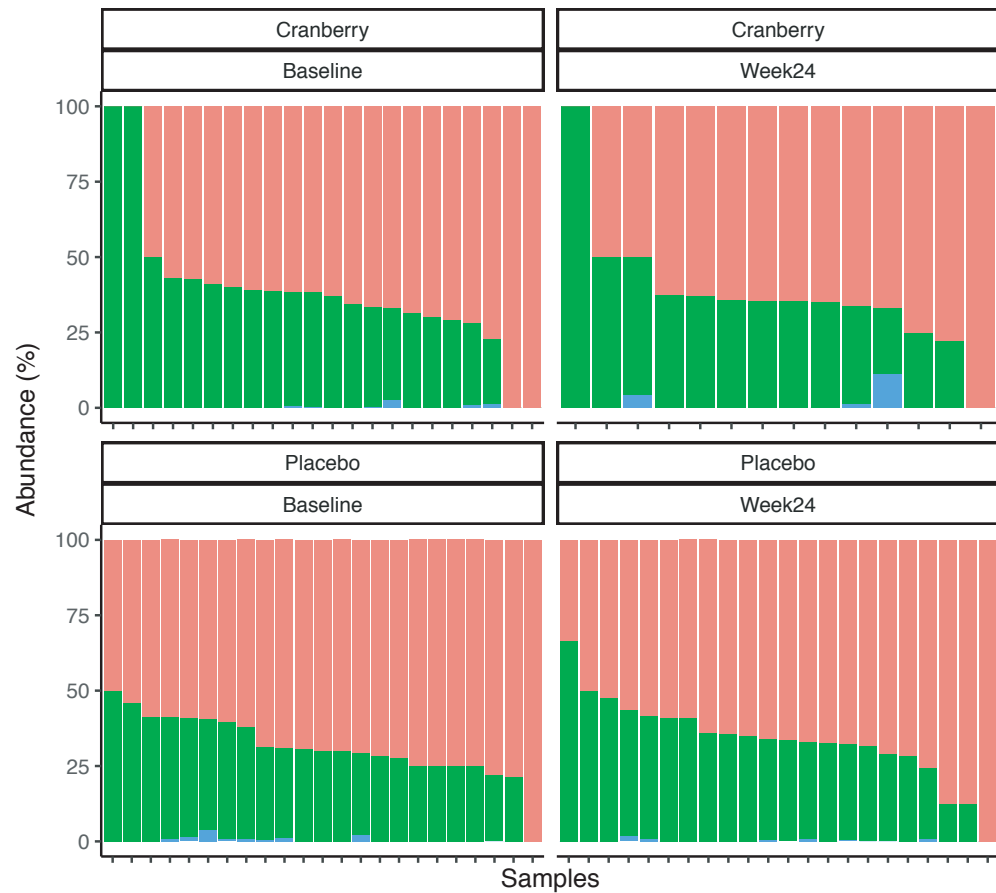

B.

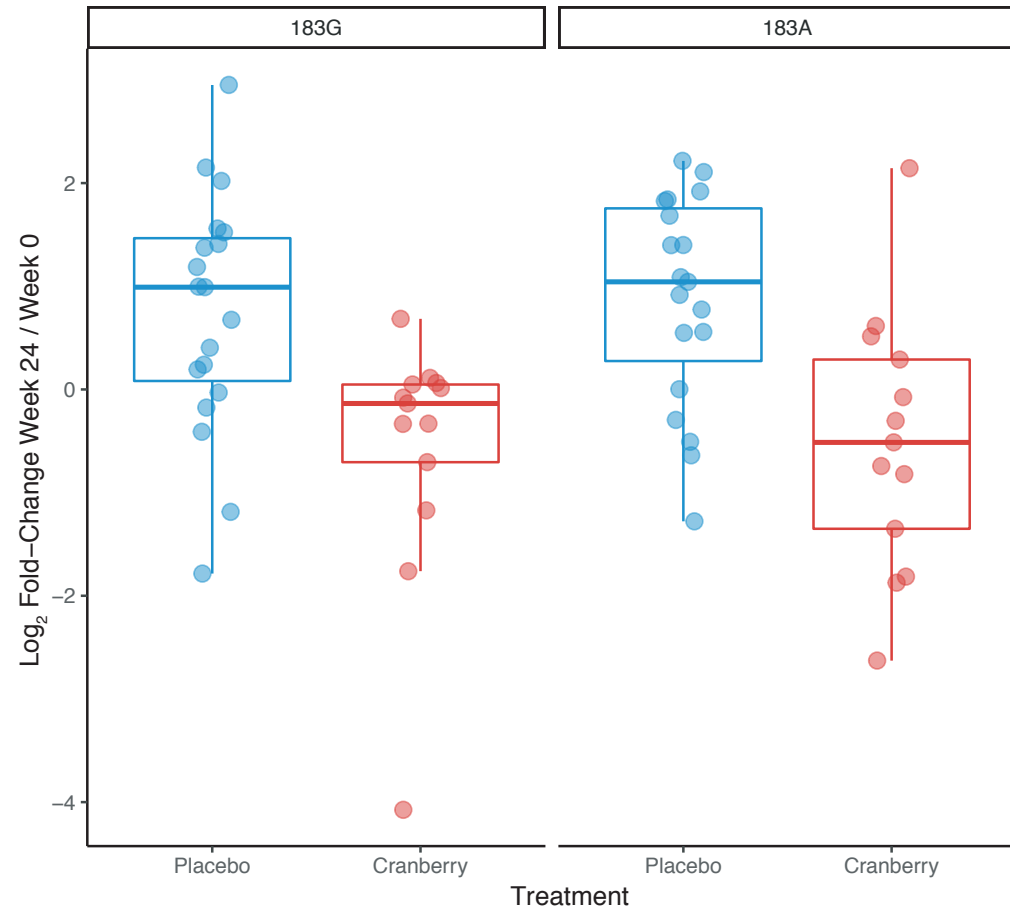

Supplement: MOESM13 [file 12866_2021_2106_MOESM13_ESM.pdf]
