# Supplementary material for: Limited effects of long-term daily cranberry consumption on the gut microbiome in a placebo-controlled study of women with recurrent urinary tract infections
Source: BMC Microbiol. 2021 Feb 18;21:53. doi: 10.1186/s12866-021-02106-4 (PMC7890861; doi:10.1186/s12866-021-02106-4)
Supplement: Supplementary file 2 — Additional file 2. HUMAnN2 pathway and gene family results. Pathway results are in the first tab, while gene family results are in the second tab. Only gene families with unadjusted p < 0.05 are included for brevity. Column B: the average abundance (in counts per million [cpm]) for the cranberry group at week 0; Column C: the average abundance (in cpm) for the cranberry group at week 24; Column D: the average abundance for the placebo group at week 0; Column E: the average abundance for the placebo group at week 24; Column F: the log2 ratio of the fold-change over 24 weeks in the cranberry group to the fold-change over 24 weeks in the placebo group, where a positive value indicates a pathway/gene family increased after 24 weeks in the cranberry group relative to the placebo group; Column G: the p-value of the Wilcoxon rank sum test comparing the fold-changes after 24 weeks between cranberry and placebo group individuals; Column H: the Benjamini-Hochberg adjusted p-value (see Materials and Methods). [file 12866_2021_2106_MOESM2_ESM.xlsx]

## Sheet: Pathways
Pathway	Cranberry.wk0	Cranberry.wk24	Placebo.wk0	Placebo.wk24	Cran.vs.Placebo	p	p.adjusted
PWY-6147: 6-hydroxymethyl-dihydropterin diphosphate biosynthesis I|unclassified	12.0917	13.4206	14.8582	9.79532	3.59838	0.0045576	0.996384
PWY-7539: 6-hydroxymethyl-dihydropterin diphosphate biosynthesis III (Chlamydia)|unclassified	10.8319	12.2271	12.9998	8.8415	3.53683	0.0045576	0.996384
GOLPDLCAT-PWY: superpathway of glycerol degradation to 1,3-propanediol|unclassified	5.09952	6.94066	7.09471	5.87604	2.76572	0.0062178	0.996384
PWY-3841: folate transformations II|g__Alistipes.s__Alistipes_putredinis	9.67718	10.8365	9.41877	8.65843	0.808664	0.00684083	0.996384
PWY-5030: L-histidine degradation III|g__Alistipes.s__Alistipes_putredinis	8.94538	9.85164	8.45858	7.64895	0.785068	0.00723194	0.996384
PWY-6387: UDP-N-acetylmuramoyl-pentapeptide biosynthesis I (meso-diaminopimelate containing)|g__Alistipes.s__Alistipes_putredinis	8.807	9.31197	7.94963	7.4286	0.717576	0.00764299	0.996384
PEPTIDOGLYCANSYN-PWY: peptidoglycan biosynthesis I (meso-diaminopimelate containing)|g__Alistipes.s__Alistipes_putredinis	8.83313	9.43377	7.92002	7.43338	0.72513	0.00807487	0.996384
PYRIDOXSYN-PWY: pyridoxal 5'-phosphate biosynthesis I	153.749	173.892	158.011	153.762	0.299734	0.00984612	0.996384
PWY0-845: superpathway of pyridoxal 5'-phosphate biosynthesis and salvage	169.105	187.274	181.21	177.451	0.250748	0.0104097	0.996384
PWY-4981: L-proline biosynthesis II (from arginine)|g__Adlercreutzia.s__Adlercreutzia_equolifaciens	0.574882	1.102	0.886201	0.519828	3.04298	0.0108792	0.996384
ANAGLYCOLYSIS-PWY: glycolysis III (from glucose)|g__Alistipes.s__Alistipes_putredinis	9.00143	9.81373	8.16803	7.0463	0.822968	0.011239	0.996384
PWY-6386: UDP-N-acetylmuramoyl-pentapeptide biosynthesis II (lysine-containing)|g__Alistipes.s__Alistipes_putredinis	8.48735	8.83918	7.75669	7.19966	0.741847	0.0117603	0.996384
PWY-5101: L-isoleucine biosynthesis II|g__Eubacterium.s__Eubacterium_hallii	0.837681	0.686529	1.47413	2.0279	-3.56519	0.0129182	0.996384
PWY-6385: peptidoglycan biosynthesis III (mycobacteria)|g__Alistipes.s__Alistipes_putredinis	8.25993	8.66497	7.38707	6.99164	0.72284	0.0130571	0.996384
GLYCOLYSIS: glycolysis I (from glucose 6-phosphate)|g__Alistipes.s__Alistipes_putredinis	9.04199	9.90032	8.1735	7.24361	0.807229	0.0131581	0.996384
PWY-6122: 5-aminoimidazole ribonucleotide biosynthesis II|g__Roseburia.s__Roseburia_intestinalis	1.47449	0.601463	2.62564	2.78437	-4.45866	0.0137517	0.996384
PWY-6277: superpathway of 5-aminoimidazole ribonucleotide biosynthesis|g__Roseburia.s__Roseburia_intestinalis	1.47449	0.601463	2.62564	2.78437	-4.45866	0.0137517	0.996384
PWY-7111: pyruvate fermentation to isobutanol (engineered)|g__Akkermansia.s__Akkermansia_muciniphila	1.80649	6.34127	5.63519	2.44134	3.20694	0.0146737	0.996384
PWY66-400: glycolysis VI (metazoan)|g__Alistipes.s__Alistipes_putredinis	8.84247	9.71884	8.11074	6.95823	0.817424	0.0170051	0.996384
DTDPRHAMSYN-PWY: dTDP-L-rhamnose biosynthesis I|g__Dorea.s__Dorea_formicigenerans	0.478235	0.369025	0.418512	0.934905	-5.26472	0.0170467	0.996384
PWY-3841: folate transformations II|g__Akkermansia.s__Akkermansia_muciniphila	1.65782	6.71423	5.51521	2.15585	3.32353	0.0194945	0.996384
ARGININE-SYN4-PWY: L-ornithine de novo biosynthesis|unclassified	9.03835	9.8528	12.1119	10.0556	0.943744	0.0197007	0.996384
PWY-5484: glycolysis II (from fructose 6-phosphate)|g__Alistipes.s__Alistipes_putredinis	9.26847	9.76132	8.12215	7.44727	0.747746	0.0228963	0.996384
PWY4LZ-257: superpathway of fermentation (Chlamydomonas reinhardtii)	10.3356	15.314	11.9909	12.1254	2.12527	0.0240774	0.996384
SER-GLYSYN-PWY: superpathway of L-serine and glycine biosynthesis I|g__Roseburia.s__Roseburia_intestinalis	1.22443	0.558925	2.39406	2.27186	-5.12989	0.024193	0.996384
PWY-5695: urate biosynthesis/inosine 5'-phosphate degradation|g__Alistipes.s__Alistipes_putredinis	9.32071	10.2247	8.39299	8.42745	0.666755	0.0250004	0.996384
PWY-7328: superpathway of UDP-glucose-derived O-antigen building blocks biosynthesis	4.85584	6.75745	4.5093	3.56933	1.65219	0.0265596	0.996384
ARGININE-SYN4-PWY: L-ornithine de novo biosynthesis	16.3307	17.0248	24.1274	20.1509	0.990046	0.0278799	0.996384
PWY66-422: D-galactose degradation V (Leloir pathway)|g__Roseburia.s__Roseburia_intestinalis	1.88834	0.845107	2.98398	3.2926	-4.23876	0.0288284	0.996384
PWY-1042: glycolysis IV (plant cytosol)|g__Alistipes.s__Alistipes_putredinis	11.4768	11.5622	9.9978	9.00289	0.201521	0.0290877	0.996384
PWY-6317: galactose degradation I (Leloir pathway)|g__Roseburia.s__Roseburia_intestinalis	2.04785	0.914539	3.36457	3.46245	-4.53193	0.0291965	0.996384
ANAGLYCOLYSIS-PWY: glycolysis III (from glucose)|g__Roseburia.s__Roseburia_intestinalis	1.79155	0.685376	2.61009	3.00479	-4.65492	0.0292919	0.996384
PWY-7237: myo-, chiro- and scillo-inositol degradation|unclassified	6.28776	7.68931	9.71816	5.46358	2.07731	0.0321784	0.996384
PWY-5104: L-isoleucine biosynthesis IV|g__Roseburia.s__Roseburia_intestinalis	1.7722	0.770125	3.09962	3.13346	-3.08695	0.0331507	0.996384
UNINTEGRATED|g__Alistipes.s__Alistipes_putredinis	9900.56	10497.8	9026.13	8633.78	0.990916	0.0347097	0.996384
PWY-5103: L-isoleucine biosynthesis III|g__Roseburia.s__Roseburia_intestinalis	1.89115	0.909812	3.03765	3.43182	-2.77431	0.0366194	0.996384
POLYAMSYN-PWY: superpathway of polyamine biosynthesis I|g__Clostridium.s__Clostridium_leptum	0.855391	0.751742	1.75	1.14812	-3.4388	0.0380053	0.996384
ILEUSYN-PWY: L-isoleucine biosynthesis I (from threonine)|g__Roseburia.s__Roseburia_intestinalis	2.34191	1.24434	3.78855	4.16592	-2.82954	0.0400576	0.996384
SER-GLYSYN-PWY: superpathway of L-serine and glycine biosynthesis I|unclassified	26.5201	31.7325	29.4435	32.5237	0.18824	0.0405768	0.996384
TRPSYN-PWY: L-tryptophan biosynthesis|g__Bacteroides.s__Bacteroides_caccae	2.92575	3.54864	2.71576	2.46535	1.32684	0.0408337	0.996384
UNINTEGRATED|g__Akkermansia.s__Akkermansia_muciniphila	908.99	3331.97	2445.59	1088	3.76226	0.0411305	0.996384
PWY-7220: adenosine deoxyribonucleotides de novo biosynthesis II|g__Flavonifractor.s__Flavonifractor_plautii	0.4214	0.37851	0.276226	0.643025	-1.4512	0.0416773	0.996384
PWY-7222: guanosine deoxyribonucleotides de novo biosynthesis II|g__Flavonifractor.s__Flavonifractor_plautii	0.4214	0.37851	0.276226	0.643025	-1.4512	0.0416773	0.996384
COA-PWY: coenzyme A biosynthesis I|g__Akkermansia.s__Akkermansia_muciniphila	1.78765	6.41722	5.13229	1.5728	3.38819	0.042036	0.996384
PWY-5505: L-glutamate and L-glutamine biosynthesis|unclassified	9.527	10.8098	10.9269	9.97886	0.782406	0.0424585	0.996384
ILEUSYN-PWY: L-isoleucine biosynthesis I (from threonine)|g__Akkermansia.s__Akkermansia_muciniphila	2.06778	6.80016	6.06134	2.70713	2.70411	0.0437685	0.996384
PWY-6317: galactose degradation I (Leloir pathway)|g__Blautia.s__Ruminococcus_torques	2.9696	2.67519	2.51116	2.92102	-2.67357	0.0438479	0.996384
PWY66-422: D-galactose degradation V (Leloir pathway)|g__Blautia.s__Ruminococcus_torques	2.9696	2.67519	2.51116	2.92102	-2.67357	0.0438479	0.996384
PWY-6703: preQ0 biosynthesis|g__Akkermansia.s__Akkermansia_muciniphila	1.15876	5.25152	3.81316	1.46866	3.58583	0.0440209	0.996384
PWY-5384: sucrose degradation IV (sucrose phosphorylase)	21.5439	21.1231	22.2682	26.3332	-0.590349	0.044412	0.996384
PWY-6124: inosine-5'-phosphate biosynthesis II|g__Bacteroides.s__Bacteroides_caccae	3.80146	4.89816	3.90378	3.85144	1.6663	0.0448717	0.996384
UNINTEGRATED|g__Clostridium.s__Clostridium_symbiosum	729.483	866.165	300.1	819.512	-4.86599	0.0455835	0.996384
BRANCHED-CHAIN-AA-SYN-PWY: superpathway of branched amino acid biosynthesis|g__Roseburia.s__Roseburia_intestinalis	1.99842	0.98185	3.17947	3.52647	-2.76965	0.0457261	0.996384
PWY-7383: anaerobic energy metabolism (invertebrates, cytosol)	56.4284	70.9469	77.9628	64.3205	1.20873	0.0464394	0.996384
P4-PWY: superpathway of L-lysine, L-threonine and L-methionine biosynthesis I|unclassified	6.0857	7.90037	6.42401	5.24557	2.39119	0.0476943	0.996384
PWY4LZ-257: superpathway of fermentation (Chlamydomonas reinhardtii)|unclassified	7.77427	9.79494	9.40486	8.54014	1.82699	0.0485427	0.996384
HISDEG-PWY: L-histidine degradation I|g__Alistipes.s__Alistipes_putredinis	9.67396	10.0581	8.77993	8.37793	0.601637	0.0495838	0.996384
VALSYN-PWY: L-valine biosynthesis|g__Roseburia.s__Roseburia_intestinalis	2.34191	1.28267	3.84633	4.16592	-2.04046	0.0498691	0.996384
PWY-6588: pyruvate fermentation to acetone	20.8497	24.1373	23.3635	22.2359	0.789511	0.0507239	0.996384
VALSYN-PWY: L-valine biosynthesis|g__Akkermansia.s__Akkermansia_muciniphila	2.16001	7.10943	6.36034	2.8545	2.46804	0.0511995	0.996384
PWY-7219: adenosine ribonucleotides de novo biosynthesis|g__Alistipes.s__Alistipes_putredinis	10.2258	11.0037	9.63221	9.08934	0.599993	0.0517734	0.996384
NONOXIPENT-PWY: pentose phosphate pathway (non-oxidative branch)|g__Roseburia.s__Roseburia_intestinalis	2.1066	0.807557	3.59477	3.62898	-3.4687	0.0530385	0.996384
PWY-7219: adenosine ribonucleotides de novo biosynthesis|g__Parabacteroides.s__Parabacteroides_merdae	3.88025	4.68592	7.14327	6.57502	0.855533	0.0531791	0.996384
UNINTEGRATED|g__Bacteroides.s__Bacteroides_caccae	8493.82	10244.8	7798.28	7753.7	1.02708	0.0534133	0.996384
PWY-6122: 5-aminoimidazole ribonucleotide biosynthesis II|unclassified	63.3863	70.6658	67.5381	63.6599	0.274501	0.0553282	0.996384
PWY-6277: superpathway of 5-aminoimidazole ribonucleotide biosynthesis|unclassified	63.3863	70.6658	67.5381	63.6599	0.274501	0.0553282	0.996384
PYRIDNUCSYN-PWY: NAD biosynthesis I (from aspartate)	125.294	134.083	138.793	132.807	0.153235	0.0553282	0.996384
ARGORNPROST-PWY: arginine, ornithine and proline interconversion|unclassified	8.7972	7.63731	6.06391	7.11192	-3.02519	0.0565536	0.996384
PWY-6527: stachyose degradation|g__Roseburia.s__Roseburia_intestinalis	1.84376	0.862715	2.90427	3.08271	-3.2471	0.0569623	0.996384
ARGSYN-PWY: L-arginine biosynthesis I (via L-ornithine)|unclassified	54.6832	62.7863	58.6337	58.4771	1.28245	0.0577555	0.996384
PWY-6122: 5-aminoimidazole ribonucleotide biosynthesis II|g__Bacteroides.s__Bacteroides_caccae	3.71665	4.46946	3.71929	3.49946	1.64064	0.0577984	0.996384
PWY-6277: superpathway of 5-aminoimidazole ribonucleotide biosynthesis|g__Bacteroides.s__Bacteroides_caccae	3.71665	4.46946	3.71929	3.49946	1.64064	0.0577984	0.996384
PWY-5686: UMP biosynthesis|g__Roseburia.s__Roseburia_intestinalis	1.18734	0.526193	2.18203	2.50476	-3.52121	0.0583031	0.996384
PWY-5695: urate biosynthesis/inosine 5'-phosphate degradation|g__Bacteroides.s__Bacteroides_caccae	3.93644	4.28736	3.96374	3.79907	1.91341	0.0590423	0.996384
GLYCOLYSIS: glycolysis I (from glucose 6-phosphate)|unclassified	46.5733	53.0759	41.9824	36.5365	1.397	0.0602689	0.996384
PWY-5484: glycolysis II (from fructose 6-phosphate)|unclassified	31.9751	36.1117	28.9924	24.5974	1.39306	0.0602689	0.996384
DTDPRHAMSYN-PWY: dTDP-L-rhamnose biosynthesis I|g__Clostridium.s__Clostridium_leptum	1.16825	0.990699	2.07225	1.31375	-4.1811	0.0603508	0.996384
PWY-5103: L-isoleucine biosynthesis III|g__Akkermansia.s__Akkermansia_muciniphila	1.76492	6.1678	5.44258	2.11684	2.84874	0.0621044	0.996384
COA-PWY-1: coenzyme A biosynthesis II (mammalian)|g__Akkermansia.s__Akkermansia_muciniphila	1.50214	5.62568	4.30641	1.45566	2.93161	0.0624117	0.996384
RHAMCAT-PWY: L-rhamnose degradation I|g__Bacteroides.s__Bacteroides_stercoris	27.2026	31.2723	15.151	19.7127	1.40675	0.0624832	0.996384
BRANCHED-CHAIN-AA-SYN-PWY: superpathway of branched amino acid biosynthesis|g__Akkermansia.s__Akkermansia_muciniphila	1.90354	6.46938	5.65338	2.26546	2.82456	0.0647898	0.996384
PWY-6737: starch degradation V|g__Roseburia.s__Roseburia_intestinalis	2.96815	1.24892	5.11843	5.405	-3.85636	0.0651095	0.996384
P108-PWY: pyruvate fermentation to propanoate I|g__Bacteroides.s__Bacteroides_caccae	4.60846	5.03928	4.26231	4.37476	0.53948	0.0651507	0.996384
PWY-7400: L-arginine biosynthesis IV (archaebacteria)|unclassified	56.6973	64.8332	60.9725	60.4774	1.2858	0.0655629	0.996384
PWY-2942: L-lysine biosynthesis III|g__Blautia.s__Ruminococcus_torques	2.46234	2.20876	1.57238	2.04482	-1.99766	0.0659422	0.996384
PWY-7111: pyruvate fermentation to isobutanol (engineered)|g__Roseburia.s__Roseburia_intestinalis	2.12278	1.06655	3.49197	3.9617	-2.51919	0.0669236	0.996384
PWY-6163: chorismate biosynthesis from 3-dehydroquinate|g__Blautia.s__Ruminococcus_obeum	1.44708	0.517338	1.32568	2.23543	-1.20766	0.0671288	0.996384
PWY-6897: thiamin salvage II|unclassified	15.2479	16.0817	15.1253	13.1251	0.849723	0.0683476	0.996384
PWY-7383: anaerobic energy metabolism (invertebrates, cytosol)|g__Akkermansia.s__Akkermansia_muciniphila	1.69762	7.05314	5.3592	2.59002	2.7419	0.0683858	0.996384
PWY-1042: glycolysis IV (plant cytosol)|g__Roseburia.s__Roseburia_intestinalis	3.05043	1.36763	3.91218	4.23239	-3.20822	0.0694708	0.996384
DAPLYSINESYN-PWY: L-lysine biosynthesis I|unclassified	4.45183	5.84472	4.49399	3.63574	2.37527	0.0695124	0.996384
PWY-1042: glycolysis IV (plant cytosol)|g__Bacteroides.s__Bacteroides_caccae	7.44186	9.71297	7.84961	7.31372	0.313506	0.0716154	0.996384
PWY-6123: inosine-5'-phosphate biosynthesis I|g__Alistipes.s__Alistipes_putredinis	10.8326	11.4632	9.56742	9.41696	0.610467	0.0723639	0.996384
PWY0-1586: peptidoglycan maturation (meso-diaminopimelate containing)|g__Roseburia.s__Roseburia_intestinalis	1.08428	0.504472	1.85941	1.70936	-3.17043	0.0723639	0.996384
BRANCHED-CHAIN-AA-SYN-PWY: superpathway of branched amino acid biosynthesis|g__Bacteroides.s__Bacteroides_caccae	4.79551	5.93598	4.29394	4.26502	1.4014	0.0767757	0.996384
PWY-5103: L-isoleucine biosynthesis III|g__Bacteroides.s__Bacteroides_caccae	4.57166	5.75988	4.08998	4.16184	1.41094	0.0767757	0.996384
BIOTIN-BIOSYNTHESIS-PWY: biotin biosynthesis I	83.7977	95.7411	93.8864	91.6481	0.229958	0.0772784	0.996384
P461-PWY: hexitol fermentation to lactate, formate, ethanol and acetate	26.2941	38.677	23.9627	26.522	1.39817	0.0772784	0.996384
PWY-7315: dTDP-N-acetylthomosamine biosynthesis|unclassified	9.57221	10.4275	8.8736	10.3925	0.687219	0.0772784	0.996384
PWY-5188: tetrapyrrole biosynthesis I (from glutamate)|g__Akkermansia.s__Akkermansia_muciniphila	1.17528	5.84712	3.48676	1.3667	3.02059	0.0773439	0.996384
PWY-6700: queuosine biosynthesis|g__Bacteroides.s__Bacteroides_caccae	3.58014	4.792	3.71422	3.48974	0.602889	0.0777719	0.996384
NONOXIPENT-PWY: pentose phosphate pathway (non-oxidative branch)|g__Clostridium.s__Clostridium_leptum	1.31815	0.974269	1.71839	1.35785	-3.84919	0.0791315	0.996384
PWY-6863: pyruvate fermentation to hexanol	10.7648	10.8865	10.2549	12.2097	-2.30007	0.0804547	0.996384
COA-PWY-1: coenzyme A biosynthesis II (mammalian)|g__Blautia.s__Ruminococcus_torques	2.70234	2.14422	1.74717	1.83326	-2.5622	0.0823402	0.996384
1CMET2-PWY: N10-formyl-tetrahydrofolate biosynthesis|g__Alistipes.s__Alistipes_putredinis	9.15482	10.0256	8.56778	7.78053	0.347069	0.0824665	0.996384
PANTO-PWY: phosphopantothenate biosynthesis I|g__Akkermansia.s__Akkermansia_muciniphila	1.7082	6.4907	4.19703	1.8423	2.55228	0.0832432	0.996384
PWY-1042: glycolysis IV (plant cytosol)|g__Flavonifractor.s__Flavonifractor_plautii	1.2476	1.04473	0.966911	1.68621	-1.46242	0.0832432	0.996384
PWY-5030: L-histidine degradation III|g__Alistipes.s__Alistipes_shahii	1.41595	2.12141	2.58747	2.40209	1.18798	0.084305	0.996384
GLUTORN-PWY: L-ornithine biosynthesis|g__Bacteroides.s__Bacteroides_thetaiotaomicron	3.02869	3.6294	3.3513	6.05268	-1.49193	0.0849381	0.996384
PWY-6124: inosine-5'-phosphate biosynthesis II|g__Alistipes.s__Alistipes_putredinis	10.5836	11.3734	9.08541	9.18132	0.578527	0.0849381	0.996384
PWY66-409: superpathway of purine nucleotide salvage	28.4929	26.4382	25.9547	33.4412	-2.52417	0.0853491	0.996384
ILEUSYN-PWY: L-isoleucine biosynthesis I (from threonine)|g__Bacteroides.s__Bacteroides_caccae	5.28211	6.42777	4.80071	4.55873	1.42957	0.0865612	0.996384
DENOVOPURINE2-PWY: superpathway of purine nucleotides de novo biosynthesis II	163.546	176.9	173.256	173.974	0.111783	0.0871192	0.996384
PWY-6519: 8-amino-7-oxononanoate biosynthesis I	74.2424	86.3943	83.3004	81.0411	0.256022	0.0871192	0.996384
PWY-7560: methylerythritol phosphate pathway II|unclassified	51.9273	54.8996	53.8341	49.5793	0.754592	0.0871192	0.996384
PWY0-781: aspartate superpathway|unclassified	6.02176	7.64067	6.59282	5.46317	1.44971	0.0879361	0.996384
PWY-4984: urea cycle|g__Lachnospiraceae_noname.s__Lachnospiraceae_bacterium_7_1_58FAA	0.523276	0.825656	0.744215	1.08177	2.54887	0.0883678	0.996384
PWY-7219: adenosine ribonucleotides de novo biosynthesis|g__Roseburia.s__Roseburia_intestinalis	2.89802	1.76677	4.5842	5.3324	-1.96609	0.0897071	0.996384
ILEUSYN-PWY: L-isoleucine biosynthesis I (from threonine)|unclassified	62.3135	71.6748	68.0599	67.3704	0.24335	0.0906117	0.996384
PWY-7117: C4 photosynthetic carbon assimilation cycle, PEPCK type	141.501	108.41	116.223	123.553	-0.654408	0.0906117	0.996384
VALSYN-PWY: L-valine biosynthesis|unclassified	62.3135	71.6748	68.0599	67.3704	0.24335	0.0906117	0.996384
PWY-5100: pyruvate fermentation to acetate and lactate II|g__Roseburia.s__Roseburia_intestinalis	1.44692	0.584086	2.97916	2.86172	-3.25278	0.0908249	0.996384
PWY-6123: inosine-5'-phosphate biosynthesis I|g__Bacteroides.s__Bacteroides_caccae	3.96866	5.00603	4.0314	3.72566	1.32738	0.0936274	0.996384
ARGININE-SYN4-PWY: L-ornithine de novo biosynthesis|g__Parabacteroides.s__Parabacteroides_merdae	2.87259	3.44252	5.5143	4.61365	1.34843	0.0938031	0.996384
COMPLETE-ARO-PWY: superpathway of aromatic amino acid biosynthesis|unclassified	69.574	76.9831	71.2538	69.7098	0.733588	0.0942138	0.996384
PWY66-399: gluconeogenesis III	110.606	130.52	144.566	130.295	1.05959	0.0942138	0.996384
PWY-5177: glutaryl-CoA degradation|unclassified	15.2156	16.8923	15.7453	14.8581	0.609832	0.0979278	0.996384
PWY-2942: L-lysine biosynthesis III|g__Bacteroides.s__Bacteroides_vulgatus	27.7619	29.9901	25.2409	26.6362	1.30786	0.0994638	0.996384
PWY-1042: glycolysis IV (plant cytosol)|g__Roseburia.s__Roseburia_hominis	2.54205	2.98427	1.03786	1.33918	-2.7265	0.100671	0.996384
PWY0-1061: superpathway of L-alanine biosynthesis|unclassified	23.4651	29.7575	30.6224	26.9183	0.953025	0.101756	0.996384
UNINTEGRATED	623895	631660	629339	622464	0.0342433	0.101756	0.996384
PWY-5097: L-lysine biosynthesis VI|g__Bacteroides.s__Bacteroides_caccae	3.56996	4.05414	3.38469	3.20556	0.886822	0.103909	0.996384
PWY-6121: 5-aminoimidazole ribonucleotide biosynthesis I|g__Roseburia.s__Roseburia_intestinalis	1.38627	0.620566	2.56594	2.76824	-3.23283	0.105086	0.996384
PWY-7219: adenosine ribonucleotides de novo biosynthesis|g__Akkermansia.s__Akkermansia_muciniphila	2.44074	7.54157	6.01898	2.8545	2.42633	0.105086	0.996384
PWY-6317: galactose degradation I (Leloir pathway)|unclassified	45.51	51.4516	43.7789	42.7773	1.26224	0.105699	0.996384
PWY-7315: dTDP-N-acetylthomosamine biosynthesis	13.9911	19.3271	14.9244	16.4169	0.873628	0.105699	0.996384
PWY-7221: guanosine ribonucleotides de novo biosynthesis|g__Alistipes.s__Alistipes_putredinis	9.45283	9.5082	8.50839	8.05908	0.543677	0.107053	0.996384
PWY-6386: UDP-N-acetylmuramoyl-pentapeptide biosynthesis II (lysine-containing)|unclassified	89.6055	93.237	88.7849	83.5005	0.774105	0.109761	0.996384
DTDPRHAMSYN-PWY: dTDP-L-rhamnose biosynthesis I|g__Alistipes.s__Alistipes_putredinis	8.68801	9.25101	7.84648	7.49655	0.66295	0.111147	0.996384
HISDEG-PWY: L-histidine degradation I|g__Alistipes.s__Alistipes_shahii	1.85241	2.49816	2.73013	2.53729	0.686698	0.113325	0.996384
NONMEVIPP-PWY: methylerythritol phosphate pathway I|unclassified	82.1746	86.1092	82.0818	77.3237	0.728111	0.113943	0.996384
PWY-2942: L-lysine biosynthesis III|unclassified	46.9903	48.8081	48.7836	44.1747	0.761726	0.113943	0.996384
PWY-7219: adenosine ribonucleotides de novo biosynthesis|g__Bacteroides.s__Bacteroides_caccae	5.0232	6.00356	4.99579	5.0034	0.979089	0.114409	0.996384
HISTSYN-PWY: L-histidine biosynthesis|g__Bacteroides.s__Bacteroides_caccae	3.01597	3.35482	3.30028	2.71611	1.42897	0.11561	0.996384
ILEUSYN-PWY: L-isoleucine biosynthesis I (from threonine)|g__Coprococcus.s__Coprococcus_comes	2.97089	2.11421	1.74476	1.97645	-2.03587	0.11561	0.996384
PWY-5101: L-isoleucine biosynthesis II|g__Coprococcus.s__Coprococcus_comes	2.39647	1.48815	1.47887	1.52653	-2.18793	0.11561	0.996384
NONMEVIPP-PWY: methylerythritol phosphate pathway I|g__Alistipes.s__Alistipes_putredinis	8.88337	9.70994	8.03918	7.62234	0.307243	0.116556	0.996384
PWY-5121: superpathway of geranylgeranyl diphosphate biosynthesis II (via MEP)	16.6891	24.65	17.0339	16.2892	1.05061	0.117367	0.996384
PWY-5989: stearate biosynthesis II (bacteria and plants)|unclassified	13.6597	14.6075	15.8015	12.8104	0.51528	0.118247	0.996384
ANAGLYCOLYSIS-PWY: glycolysis III (from glucose)|g__Blautia.s__Ruminococcus_torques	3.33426	3.02871	2.86806	2.66368	-3.15411	0.11936	0.996384
PWY-5030: L-histidine degradation III|g__Bacteroides.s__Bacteroides_thetaiotaomicron	2.58244	3.3868	2.82852	4.99068	-1.68717	0.121918	0.996384
PWY0-1261: anhydromuropeptides recycling	34.4674	39.341	28.4597	38.0607	-2.32594	0.121988	0.996384
P185-PWY: formaldehyde assimilation III (dihydroxyacetone cycle)|unclassified	22.7905	24.0138	26.7429	22.5036	1.39837	0.122675	0.996384
PWY-6549: L-glutamine biosynthesis III	52.9779	47.1484	50.6951	54.5646	-0.373099	0.122675	0.996384
PWY-6121: 5-aminoimidazole ribonucleotide biosynthesis I|g__Alistipes.s__Alistipes_shahii	1.59765	2.15731	2.62112	2.36087	0.761817	0.123902	0.996384
SER-GLYSYN-PWY: superpathway of L-serine and glycine biosynthesis I|g__Alistipes.s__Alistipes_putredinis	9.90828	10.7657	8.89772	9.03651	0.646887	0.124174	0.996384
PWY-7208: superpathway of pyrimidine nucleobases salvage|g__Roseburia.s__Roseburia_intestinalis	1.75029	0.680797	3.24726	2.881	-4.25218	0.125342	0.996384
ARO-PWY: chorismate biosynthesis I|unclassified	74.4352	82.1364	75.1209	73.5102	0.739931	0.12723	0.996384
GALACTUROCAT-PWY: D-galacturonate degradation I	107.048	114.351	108.511	104.626	0.188316	0.12723	0.996384
PWY0-1061: superpathway of L-alanine biosynthesis	44.7567	57.6226	54.3261	48.1901	0.954232	0.12723	0.996384
DTDPRHAMSYN-PWY: dTDP-L-rhamnose biosynthesis I|g__Bacteroides.s__Bacteroides_vulgatus	34.4068	38.5961	34.0102	32.3683	1.15537	0.128681	0.996384
PEPTIDOGLYCANSYN-PWY: peptidoglycan biosynthesis I (meso-diaminopimelate containing)|g__Dorea.s__Dorea_longicatena	1.44816	0.630472	0.886893	0.934436	-2.43983	0.130031	0.996384
PWY-6124: inosine-5'-phosphate biosynthesis II|g__Bacteroides.s__Bacteroides_xylanisolvens	3.60951	2.39634	1.55507	1.65099	-1.7354	0.130323	0.996384
PWY-6122: 5-aminoimidazole ribonucleotide biosynthesis II|g__Akkermansia.s__Akkermansia_muciniphila	1.57433	5.90065	5.12313	2.36668	2.17254	0.131322	0.996384
PWY-6277: superpathway of 5-aminoimidazole ribonucleotide biosynthesis|g__Akkermansia.s__Akkermansia_muciniphila	1.57433	5.90065	5.12313	2.36668	2.17254	0.131322	0.996384
PWY-7663: gondoate biosynthesis (anaerobic)|g__Bacteroides.s__Bacteroides_vulgatus	33.4062	35.2502	28.9	29.6862	1.37189	0.133144	0.996384
PWY-5705: allantoin degradation to glyoxylate III	2.63408	4.62787	2.89209	2.45662	1.93083	0.133401	0.996384
PWY-7219: adenosine ribonucleotides de novo biosynthesis|g__Dorea.s__Dorea_longicatena	3.09531	1.32388	2.72384	2.7578	-1.26478	0.133501	0.996384
PWY-5103: L-isoleucine biosynthesis III|unclassified	51.4863	59.9717	56.463	56.8248	0.261722	0.136725	0.996384
PWY-6123: inosine-5'-phosphate biosynthesis I|unclassified	26.0223	28.4784	25.3869	23.7091	0.425843	0.136725	0.996384
PWY-841: superpathway of purine nucleotides de novo biosynthesis I	165.765	181.803	180.65	182.51	0.117742	0.136725	0.996384
PWY-6385: peptidoglycan biosynthesis III (mycobacteria)|g__Bacteroides.s__Bacteroides_caccae	3.63514	4.29186	3.73595	3.22274	2.17985	0.137278	0.996384
PWY-5100: pyruvate fermentation to acetate and lactate II|g__Blautia.s__Ruminococcus_obeum	2.07938	1.89001	1.71847	2.109	-0.812309	0.137763	0.996384
PWY4FS-7: phosphatidylglycerol biosynthesis I (plastidic)|g__Roseburia.s__Roseburia_intestinalis	1.14557	0.423977	2.09218	1.86277	-3.45991	0.139713	0.996384
PWY4FS-8: phosphatidylglycerol biosynthesis II (non-plastidic)|g__Roseburia.s__Roseburia_intestinalis	1.14557	0.423977	2.09218	1.86277	-3.45991	0.139713	0.996384
PWY0-1586: peptidoglycan maturation (meso-diaminopimelate containing)|g__Blautia.s__Ruminococcus_torques	0.515176	0.841163	0.919332	0.749816	2.05201	0.14072	0.996384
BRANCHED-CHAIN-AA-SYN-PWY: superpathway of branched amino acid biosynthesis|unclassified	55.6016	64.4198	61.2606	61.4233	0.251411	0.141669	0.996384
PWY-3001: superpathway of L-isoleucine biosynthesis I|unclassified	39.8256	43.7564	42.1679	40.9069	0.70357	0.141669	0.996384
PWY-6121: 5-aminoimidazole ribonucleotide biosynthesis I|unclassified	58.0653	63.3377	60.3749	58.8044	0.190409	0.141669	0.996384
PWY-6629: superpathway of L-tryptophan biosynthesis	55.3611	63.5378	58.8127	56.3069	0.815321	0.141669	0.996384
PWY66-400: glycolysis VI (metazoan)|unclassified	27.6535	34.4555	24.9605	24.3177	1.91145	0.141669	0.996384
COA-PWY-1: coenzyme A biosynthesis II (mammalian)|g__Bacteroides.s__Bacteroides_ovatus	1.61162	3.11458	4.0944	3.92615	-3.35322	0.141757	0.996384
PWY-7208: superpathway of pyrimidine nucleobases salvage|g__Bacteroides.s__Bacteroides_ovatus	8.16254	10.4338	10.7732	10.9032	0.435292	0.142997	0.996384
RHAMCAT-PWY: L-rhamnose degradation I|g__Bacteroides.s__Bacteroides_xylanisolvens	1.97032	1.89333	0.852919	1.84911	-2.67224	0.143017	0.996384
PWY-7234: inosine-5'-phosphate biosynthesis III|g__Alistipes.s__Alistipes_putredinis	10.2668	10.3858	8.88254	8.79571	0.530451	0.14336	0.996384
PWY-6121: 5-aminoimidazole ribonucleotide biosynthesis I|g__Akkermansia.s__Akkermansia_muciniphila	1.28438	5.73802	4.71045	2.18335	2.67362	0.144861	0.996384
UNINTEGRATED|g__Lachnospiraceae_noname.s__Lachnospiraceae_bacterium_7_1_58FAA	2129.63	2322.4	2629.73	2893.79	3.37889	0.145599	0.996384
PWY-1042: glycolysis IV (plant cytosol)|g__Blautia.s__Ruminococcus_torques	6.02201	5.41588	4.8932	4.96363	-1.78263	0.145676	0.996384
HEXITOLDEGSUPER-PWY: superpathway of hexitol degradation (bacteria)	50.8937	56.8449	48.9854	48.2287	1.34215	0.146747	0.996384
PEPTIDOGLYCANSYN-PWY: peptidoglycan biosynthesis I (meso-diaminopimelate containing)|unclassified	81.0607	84.3308	78.2811	74.277	0.756391	0.146747	0.996384
PWY-6387: UDP-N-acetylmuramoyl-pentapeptide biosynthesis I (meso-diaminopimelate containing)|unclassified	85.7135	88.9415	84.4925	79.7199	0.770147	0.146747	0.996384
PWY-7357: thiamin formation from pyrithiamine and oxythiamine (yeast)|unclassified	34.7994	38.2143	38.4444	36.3054	0.33609	0.146747	0.996384
UNMAPPED	340893	332214	335415	342954	-0.0689076	0.146747	0.996384
ANAGLYCOLYSIS-PWY: glycolysis III (from glucose)|g__Bacteroides.s__Bacteroides_caccae	4.9061	6.01162	4.80405	4.67965	0.63439	0.147429	0.996384
VALSYN-PWY: L-valine biosynthesis|g__Coprococcus.s__Coprococcus_comes	2.97089	2.20274	1.92814	2.24672	-1.26579	0.147444	0.996384
PWY-6121: 5-aminoimidazole ribonucleotide biosynthesis I|g__Bacteroides.s__Bacteroides_vulgatus	27.8706	28.5106	24.4423	24.8279	1.18405	0.148148	0.996384
PWY-1042: glycolysis IV (plant cytosol)|g__Akkermansia.s__Akkermansia_muciniphila	2.09466	7.27622	6.21963	2.89502	1.53318	0.150041	0.996384
PWY-6121: 5-aminoimidazole ribonucleotide biosynthesis I|g__Parabacteroides.s__Parabacteroides_merdae	2.93367	3.218	5.28953	4.49425	1.01873	0.150232	0.996384
PWY-6387: UDP-N-acetylmuramoyl-pentapeptide biosynthesis I (meso-diaminopimelate containing)|g__Bacteroides.s__Bacteroides_caccae	4.05952	4.76503	4.11449	3.82119	2.13031	0.151459	0.996384
ANAEROFRUCAT-PWY: homolactic fermentation|unclassified	33.8584	37.8895	31.1297	25.858	0.868438	0.15196	0.996384
PWY-6901: superpathway of glucose and xylose degradation	52.601	62.4378	63.9646	65.0517	0.756387	0.15196	0.996384
CALVIN-PWY: Calvin-Benson-Bassham cycle|g__Roseburia.s__Roseburia_inulinivorans	2.34258	1.805	1.40276	1.48205	-2.52454	0.15559	0.996384
PWY-7210: pyrimidine deoxyribonucleotides biosynthesis from CTP	20.1374	24.2927	23.8889	23.725	1.15339	0.156082	0.996384
PWY-7228: superpathway of guanosine nucleotides de novo biosynthesis I|g__Bacteroides.s__Bacteroides_dorei	8.26157	10.4906	8.09392	7.73257	1.13498	0.156518	0.996384
PWY-7221: guanosine ribonucleotides de novo biosynthesis|g__Akkermansia.s__Akkermansia_muciniphila	1.48182	5.69027	3.86121	2.11063	0.970589	0.156844	0.996384
GLUTORN-PWY: L-ornithine biosynthesis|unclassified	25.1863	30.578	25.6993	28.0282	1.15291	0.157311	0.996384
HSERMETANA-PWY: L-methionine biosynthesis III|unclassified	20.9251	23.6511	21.0601	20.0579	0.763474	0.157311	0.996384
OANTIGEN-PWY: O-antigen building blocks biosynthesis (E. coli)	64.7652	61.6809	66.8049	75.3085	0.54551	0.157311	0.996384
PWY-5913: TCA cycle VI (obligate autotrophs)	142.1	113.722	117.19	145.276	-0.587511	0.157311	0.996384
PWY-6737: starch degradation V|unclassified	128.24	143.281	122.141	119.702	0.861349	0.157311	0.996384
PWY-7003: glycerol degradation to butanol|unclassified	9.07343	10.2408	11.7191	10.8258	1.21038	0.157311	0.996384
PWY-7237: myo-, chiro- and scillo-inositol degradation	16.3508	21.021	14.7853	10.5597	0.991263	0.157311	0.996384
PWY-7388: octanoyl-[acyl-carrier protein] biosynthesis (mitochondria, yeast)	231.574	245.866	230.386	224.176	0.160661	0.157311	0.996384
PEPTIDOGLYCANSYN-PWY: peptidoglycan biosynthesis I (meso-diaminopimelate containing)|g__Bacteroides.s__Bacteroides_caccae	4.10187	4.76361	4.02334	3.80856	1.7628	0.158175	0.996384
PWY-7221: guanosine ribonucleotides de novo biosynthesis|g__Eubacterium.s__Eubacterium_rectale	25.1257	13.4578	28.9958	21.7569	-1.49282	0.15828	0.996384
P108-PWY: pyruvate fermentation to propanoate I|g__Bacteroides.s__Bacteroides_vulgatus	32.6329	33.7459	27.9085	29.2157	0.451774	0.158601	0.996384
PWY-6163: chorismate biosynthesis from 3-dehydroquinate|g__Roseburia.s__Roseburia_intestinalis	1.71583	0.560892	3.24655	3.15133	-2.94291	0.159351	0.996384
PWY-7221: guanosine ribonucleotides de novo biosynthesis|g__Alistipes.s__Alistipes_shahii	1.91888	2.37699	2.94427	2.60982	0.869673	0.159351	0.996384
P441-PWY: superpathway of N-acetylneuraminate degradation|unclassified	3.57855	5.65989	4.79416	4.92496	2.55133	0.161795	0.996384
PWY-5030: L-histidine degradation III|unclassified	8.77487	8.89065	6.70216	5.29978	3.23905	0.163502	0.996384
PWY-7111: pyruvate fermentation to isobutanol (engineered)|g__Bacteroides.s__Bacteroides_caccae	4.88597	5.96911	4.33287	4.48124	0.33186	0.163633	0.996384
PWY-1042: glycolysis IV (plant cytosol)|g__Coprococcus.s__Coprococcus_comes	3.59128	2.85655	2.67426	3.02046	-0.831251	0.163758	0.996384
UNINTEGRATED|g__Eubacterium.s__Eubacterium_rectale	23485.3	13531.5	28088.6	20047.7	-0.332486	0.164223	0.996384
PWY-6737: starch degradation V|g__Eubacterium.s__Eubacterium_rectale	38.3871	21.0156	44.2944	34.2396	-1.42468	0.16629	0.996384
PWY-5154: L-arginine biosynthesis III (via N-acetyl-L-citrulline)|g__Bacteroides.s__Bacteroides_caccae	4.18915	4.72254	3.84564	3.8015	0.889743	0.166604	0.996384
COLANSYN-PWY: colanic acid building blocks biosynthesis|unclassified	12.3129	13.9376	11.7947	11.6589	-0.281368	0.168431	0.996384
PWY-6124: inosine-5'-phosphate biosynthesis II|unclassified	24.1237	26.8022	24.084	24.8696	0.293941	0.168431	0.996384
PWY-6163: chorismate biosynthesis from 3-dehydroquinate|unclassified	81.1436	88.0566	81.0489	79.5182	0.683868	0.168431	0.996384
PWY-6478: GDP-D-glycero-&alpha;-D-manno-heptose biosynthesis	3.94358	5.01317	5.1421	4.28236	3.21721	0.169323	0.996384
PWY-5484: glycolysis II (from fructose 6-phosphate)|g__Bacteroides.s__Bacteroides_vulgatus	33.3234	34.6552	29.285	30.3763	0.855898	0.171974	0.996384
CITRULBIO-PWY: L-citrulline biosynthesis	44.1486	43.691	45.6336	36.7915	0.876758	0.174204	0.996384
P42-PWY: incomplete reductive TCA cycle	46.4793	51.4918	48.1008	48.6843	0.722714	0.174204	0.996384
PWY-7111: pyruvate fermentation to isobutanol (engineered)|unclassified	59.8189	67.7437	65.0789	64.3931	0.203118	0.174204	0.996384
PWY-7187: pyrimidine deoxyribonucleotides de novo biosynthesis II	173.106	182.303	172.176	170.52	0.111609	0.174204	0.996384
PWY-7560: methylerythritol phosphate pathway II	86.7146	97.4444	97.0135	95.4901	0.223944	0.174204	0.996384
PWY-7111: pyruvate fermentation to isobutanol (engineered)|g__Eubacterium.s__Eubacterium_rectale	34.2657	18.4955	40.5431	27.9305	-0.730283	0.175322	0.996384
VALSYN-PWY: L-valine biosynthesis|g__Eubacterium.s__Eubacterium_rectale	34.2657	18.4955	40.5431	27.9305	-0.730283	0.175322	0.996384
PWY-5695: urate biosynthesis/inosine 5'-phosphate degradation|g__Bacteroides.s__Bacteroides_vulgatus	33.2905	35.932	29.0203	31.7404	0.72135	0.175552	0.996384
PWY-6385: peptidoglycan biosynthesis III (mycobacteria)|g__Parabacteroides.s__Parabacteroides_merdae	2.54633	2.69198	4.4756	4.40037	1.07847	0.178878	0.996384
PRPP-PWY: superpathway of histidine, purine, and pyrimidine biosynthesis	95.7186	102.201	100.655	90.4847	0.717465	0.18012	0.996384
PWY-7219: adenosine ribonucleotides de novo biosynthesis|g__Lachnospiraceae_noname.s__Lachnospiraceae_bacterium_3_1_46FAA	0.889202	0.852121	0.886068	0.740089	2.68954	0.180476	0.996384
PWY-5667: CDP-diacylglycerol biosynthesis I|g__Roseburia.s__Roseburia_intestinalis	1.56991	0.501868	2.85499	2.52227	-3.39882	0.181145	0.996384
PWY0-1319: CDP-diacylglycerol biosynthesis II|g__Roseburia.s__Roseburia_intestinalis	1.56991	0.501868	2.85499	2.52227	-3.39882	0.181145	0.996384
PWY-5667: CDP-diacylglycerol biosynthesis I|g__Blautia.s__Ruminococcus_obeum	1.73927	0.622523	1.87576	2.55114	-1.87033	0.184468	0.996384
PWY0-1319: CDP-diacylglycerol biosynthesis II|g__Blautia.s__Ruminococcus_obeum	1.73927	0.622523	1.87576	2.55114	-1.87033	0.184468	0.996384
UNINTEGRATED|g__Alistipes.s__Alistipes_shahii	1832.15	2206.9	2644.24	2380.96	1.80029	0.18596	0.996384
PWY-724: superpathway of L-lysine, L-threonine and L-methionine biosynthesis II|g__Faecalibacterium.s__Faecalibacterium_prausnitzii	8.98035	7.38025	8.20566	8.76055	-0.911645	0.186051	0.996384
PWY-7282: 4-amino-2-methyl-5-phosphomethylpyrimidine biosynthesis (yeast)	99.497	113.089	111.662	105.138	0.216348	0.186182	0.996384
COA-PWY: coenzyme A biosynthesis I|g__Blautia.s__Ruminococcus_torques	2.70025	2.0645	1.78419	1.77993	-1.82503	0.186358	0.996384
PWY0-1586: peptidoglycan maturation (meso-diaminopimelate containing)|g__Roseburia.s__Roseburia_inulinivorans	1.62028	1.16994	1.08829	0.965325	-2.54642	0.187281	0.996384
FUC-RHAMCAT-PWY: superpathway of fucose and rhamnose degradation	14.1831	20.3747	18.0728	13.6663	0.335948	0.187571	0.996384
PWY-6151: S-adenosyl-L-methionine cycle I|g__Ruminococcus.s__Ruminococcus_bromii	4.23492	6.45069	5.92403	6.6634	2.70626	0.190313	0.996384
PWY-7198: pyrimidine deoxyribonucleotides de novo biosynthesis IV	15.9416	18.8755	18.3114	19.0821	1.13258	0.190682	0.996384
PWY-4242: pantothenate and coenzyme A biosynthesis III	47.8592	53.7829	45.0838	42.9221	0.169973	0.192391	0.996384
FUCCAT-PWY: fucose degradation|g__Akkermansia.s__Akkermansia_muciniphila	1.40211	5.45075	4.20379	1.7541	1.77773	0.192917	0.996384
PWY-6737: starch degradation V|g__Blautia.s__Ruminococcus_torques	3.51068	3.08234	2.90885	3.1636	-1.23447	0.193279	0.996384
PWY-6122: 5-aminoimidazole ribonucleotide biosynthesis II|g__Bacteroides.s__Bacteroides_vulgatus	27.3066	27.8614	23.8124	24.0211	1.14805	0.193717	0.996384
PWY-6277: superpathway of 5-aminoimidazole ribonucleotide biosynthesis|g__Bacteroides.s__Bacteroides_vulgatus	27.3066	27.8614	23.8124	24.0211	1.14805	0.193717	0.996384
FUCCAT-PWY: fucose degradation	7.23967	14.1088	9.52924	6.72673	0.468667	0.193774	0.996384
PANTO-PWY: phosphopantothenate biosynthesis I|g__Roseburia.s__Roseburia_intestinalis	1.21658	0.642237	3.10557	2.52106	-3.02522	0.195432	0.996384
PWY66-400: glycolysis VI (metazoan)|g__Parabacteroides.s__Parabacteroides_distasonis	9.20495	6.61394	5.09995	3.11341	-0.169596	0.195538	0.996384
PWY-2942: L-lysine biosynthesis III|g__Alistipes.s__Alistipes_shahii	2.03037	2.6387	2.79804	2.6427	1.09825	0.197142	0.996384
PEPTIDOGLYCANSYN-PWY: peptidoglycan biosynthesis I (meso-diaminopimelate containing)|g__Bacteroides.s__Bacteroides_thetaiotaomicron	3.22989	4.11575	4.05766	6.52229	-0.226425	0.197406	0.996384
PWY-5686: UMP biosynthesis|unclassified	88.2641	96.7197	90.3007	87.6178	0.733916	0.198747	0.996384
TRPSYN-PWY: L-tryptophan biosynthesis|g__Blautia.s__Ruminococcus_torques	3.01297	2.06832	2.34148	1.84323	-2.25118	0.19901	0.996384
COA-PWY-1: coenzyme A biosynthesis II (mammalian)|g__Roseburia.s__Roseburia_inulinivorans	1.21005	0.919994	0.959437	0.900865	-1.98116	0.199544	0.996384
PWY-1042: glycolysis IV (plant cytosol)|g__Eubacterium.s__Eubacterium_rectale	36.082	19.8302	40.4033	29.5743	-0.745031	0.199972	0.996384
PWY-7197: pyrimidine deoxyribonucleotide phosphorylation|unclassified	11.3967	13.0072	11.062	12.1586	-1.78225	0.199972	0.996384
PWY-6121: 5-aminoimidazole ribonucleotide biosynthesis I|g__Bacteroides.s__Bacteroides_caccae	3.83317	4.5506	3.6308	3.55331	1.28559	0.201986	0.996384
RHAMCAT-PWY: L-rhamnose degradation I|g__Bacteroides.s__Bacteroides_caccae	3.36073	4.01511	3.70793	3.72931	-0.0282937	0.201986	0.996384
PANTO-PWY: phosphopantothenate biosynthesis I|g__Alistipes.s__Alistipes_putredinis	10.0487	10.6508	9.11125	8.94276	0.212143	0.203291	0.996384
PWY-6737: starch degradation V|g__Eubacterium.s__Eubacterium_ramulus	0.567394	0.669839	0.859269	0.277932	1.76841	0.203397	0.996384
PWY-7221: guanosine ribonucleotides de novo biosynthesis|g__Roseburia.s__Roseburia_inulinivorans	1.36688	1.14172	0.832372	0.968369	-2.08812	0.205249	0.996384
ARGSYNBSUB-PWY: L-arginine biosynthesis II (acetyl cycle)|unclassified	36.737	44.4992	38.6729	40.8969	1.24392	0.205253	0.996384
PWY-6606: guanosine nucleotides degradation II	17.3717	18.729	21.1525	17.5655	0.851689	0.205253	0.996384
UDPNAGSYN-PWY: UDP-N-acetyl-D-glucosamine biosynthesis I	37.4819	36.7759	39.4605	45.3648	0.434543	0.205253	0.996384
PWY-6317: galactose degradation I (Leloir pathway)|g__Eubacterium.s__Eubacterium_rectale	28.0444	14.6359	32.6793	23.265	-0.716778	0.205503	0.996384
PWY66-422: D-galactose degradation V (Leloir pathway)|g__Eubacterium.s__Eubacterium_rectale	28.0444	14.6359	32.6793	23.265	-0.716778	0.205503	0.996384
PWY490-3: nitrate reduction VI (assimilatory)	0.737135	0.57079	1.70024	1.34501	-2.1829	0.206753	0.996384
PWY-5097: L-lysine biosynthesis VI|g__Roseburia.s__Roseburia_intestinalis	1.37641	0.836986	2.61036	2.34791	-2.41098	0.207057	0.996384
DTDPRHAMSYN-PWY: dTDP-L-rhamnose biosynthesis I|g__Alistipes.s__Alistipes_shahii	2.05594	3.009	3.57559	3.22976	1.53074	0.210441	0.996384
GLUTORN-PWY: L-ornithine biosynthesis|g__Bacteroides.s__Bacteroides_caccae	3.73184	4.33169	3.75537	3.52191	1.67885	0.211991	0.996384
PWY0-1296: purine ribonucleosides degradation|g__Roseburia.s__Roseburia_intestinalis	1.21307	0.49901	2.15761	1.99183	-2.70193	0.211991	0.996384
P108-PWY: pyruvate fermentation to propanoate I|unclassified	2.19732	1.92914	2.89812	2.55688	-2.4318	0.213362	0.996384
POLYISOPRENSYN-PWY: polyisoprenoid biosynthesis (E. coli)	2.90209	6.3166	2.01441	2.53731	0.56659	0.213362	0.996384
PWY-3841: folate transformations II|g__Bacteroides.s__Bacteroides_caccae	3.79873	4.89796	3.42628	3.42958	1.0458	0.213362	0.996384
PWY-7221: guanosine ribonucleotides de novo biosynthesis|g__Bacteroides.s__Bacteroides_caccae	5.27902	6.21114	5.22522	5.36758	0.983035	0.213362	0.996384
PWY-6386: UDP-N-acetylmuramoyl-pentapeptide biosynthesis II (lysine-containing)|g__Bacteroides.s__Bacteroides_caccae	3.60022	4.25629	3.7948	3.18728	1.80201	0.213865	0.996384
PWY-6122: 5-aminoimidazole ribonucleotide biosynthesis II|g__Parabacteroides.s__Parabacteroides_merdae	3.0821	3.21008	5.30651	4.71787	0.844769	0.217302	0.996384
PWY-6277: superpathway of 5-aminoimidazole ribonucleotide biosynthesis|g__Parabacteroides.s__Parabacteroides_merdae	3.0821	3.21008	5.30651	4.71787	0.844769	0.217302	0.996384
HISDEG-PWY: L-histidine degradation I	186.805	189.773	180.656	177.8	0.147213	0.218719	0.996384
PWY-4242: pantothenate and coenzyme A biosynthesis III|unclassified	21.8566	22.9163	21.4468	19.6334	0.188407	0.218719	0.996384
PWY-6883: pyruvate fermentation to butanol II	6.3753	6.48072	6.25298	6.82564	-0.663776	0.218719	0.996384
PWY-1042: glycolysis IV (plant cytosol)|g__Alistipes.s__Alistipes_shahii	3.37031	4.23522	4.39173	4.15021	1.90145	0.218891	0.996384
PWY-6609: adenine and adenosine salvage III|g__Blautia.s__Ruminococcus_torques	4.36938	3.60355	3.80859	3.8682	-0.988557	0.219303	0.996384
VALSYN-PWY: L-valine biosynthesis|g__Bacteroides.s__Bacteroides_caccae	5.29498	6.42777	4.8549	4.70403	0.370466	0.220274	0.996384
PWY-3781: aerobic respiration I (cytochrome c)	5.71191	4.42387	2.9533	3.28326	-1.49008	0.222547	0.996384
VALSYN-PWY: L-valine biosynthesis|g__Bacteroides.s__Bacteroides_xylanisolvens	3.85133	2.8483	1.71599	2.38271	-2.79562	0.222608	0.996384
PWY-5667: CDP-diacylglycerol biosynthesis I|g__Lachnospiraceae_noname.s__Lachnospiraceae_bacterium_5_1_63FAA	0.770246	0.840905	1.21275	1.32802	1.75284	0.223789	0.996384
PWY0-1319: CDP-diacylglycerol biosynthesis II|g__Lachnospiraceae_noname.s__Lachnospiraceae_bacterium_5_1_63FAA	0.770246	0.840905	1.21275	1.32802	1.75284	0.223789	0.996384
ANAGLYCOLYSIS-PWY: glycolysis III (from glucose)|g__Parabacteroides.s__Parabacteroides_merdae	3.57064	4.14593	6.38848	5.98821	0.743278	0.224244	0.996384
PWY-6121: 5-aminoimidazole ribonucleotide biosynthesis I|g__Ruminococcus.s__Ruminococcus_bromii	2.92832	4.41172	3.32707	4.64189	-0.320445	0.224703	0.996384
SO4ASSIM-PWY: sulfate reduction I (assimilatory)	5.46585	13.2443	6.85731	3.20556	2.46137	0.225453	0.996384
METSYN-PWY: L-homoserine and L-methionine biosynthesis|unclassified	29.3144	32.1169	29.7972	28.8913	0.7323	0.22568	0.996384
PANTO-PWY: phosphopantothenate biosynthesis I|g__Bacteroides.s__Bacteroides_vulgatus	29.3417	29.8926	24.8689	24.6991	-0.0091033	0.226747	0.996384
PWY-5103: L-isoleucine biosynthesis III|g__Bacteroides.s__Bacteroides_ovatus	6.80347	8.35012	9.44217	9.31017	0.962743	0.226896	0.996384
PWY-5695: urate biosynthesis/inosine 5'-phosphate degradation|g__Bacteroides.s__Bacteroides_thetaiotaomicron	3.28088	3.9327	3.88878	5.89016	-1.65532	0.227774	0.996384
ILEUSYN-PWY: L-isoleucine biosynthesis I (from threonine)|g__Clostridium.s__Clostridium_leptum	1.23772	0.970046	2.0952	1.44573	-2.92974	0.227962	0.996384
PWY-6122: 5-aminoimidazole ribonucleotide biosynthesis II|g__Coprococcus.s__Coprococcus_comes	2.89971	1.93086	1.92132	1.91581	-0.651891	0.227962	0.996384
PWY-6277: superpathway of 5-aminoimidazole ribonucleotide biosynthesis|g__Coprococcus.s__Coprococcus_comes	2.89971	1.93086	1.92132	1.91581	-0.651891	0.227962	0.996384
PWY-7221: guanosine ribonucleotides de novo biosynthesis|g__Coprococcus.s__Coprococcus_comes	1.95497	1.28264	1.31846	1.44585	-1.22759	0.229806	0.996384
PEPTIDOGLYCANSYN-PWY: peptidoglycan biosynthesis I (meso-diaminopimelate containing)|g__Parabacteroides.s__Parabacteroides_merdae	2.63208	2.75795	4.7067	4.54618	1.10704	0.231343	0.996384
PWY-6387: UDP-N-acetylmuramoyl-pentapeptide biosynthesis I (meso-diaminopimelate containing)|g__Bacteroides.s__Bacteroides_thetaiotaomicron	3.27644	4.2793	4.06775	6.4623	-0.562031	0.231343	0.996384
PWY-7208: superpathway of pyrimidine nucleobases salvage|g__Bacteroides.s__Bacteroides_dorei	5.55689	7.76026	5.92011	6.00414	1.48335	0.232148	0.996384
CALVIN-PWY: Calvin-Benson-Bassham cycle|unclassified	74.5112	80.2518	74.0786	71.8329	0.696534	0.232795	0.996384
FASYN-INITIAL-PWY: superpathway of fatty acid biosynthesis initiation (E. coli)	300.53	313.941	299.594	296.072	0.126947	0.232795	0.996384
PPGPPMET-PWY: ppGpp biosynthesis	17.0352	20.1969	18.4888	15.9079	0.282093	0.232795	0.996384
PWY-7196: superpathway of pyrimidine ribonucleosides salvage	91.8466	92.7518	91.3834	72.2287	0.188826	0.232795	0.996384
PWY0-162: superpathway of pyrimidine ribonucleotides de novo biosynthesis	133.603	148.111	125.032	118.567	0.201415	0.232795	0.996384
PWY-7219: adenosine ribonucleotides de novo biosynthesis|g__Clostridium.s__Clostridium_leptum	1.17058	0.831818	1.50137	1.29881	-3.00713	0.234952	0.996384
UNINTEGRATED|g__Clostridium.s__Clostridium_hathewayi	719.784	537.228	548.322	769.945	-3.39473	0.235182	0.996384
PWY-6700: queuosine biosynthesis|g__Bacteroides.s__Bacteroides_thetaiotaomicron	2.96851	3.85407	3.4561	6.6163	-2.04528	0.235807	0.996384
PWY-7219: adenosine ribonucleotides de novo biosynthesis|g__Dorea.s__Dorea_formicigenerans	0.813668	0.830791	1.1221	1.55113	-1.33913	0.236173	0.996384
PWY-6387: UDP-N-acetylmuramoyl-pentapeptide biosynthesis I (meso-diaminopimelate containing)|g__Blautia.s__Ruminococcus_torques	3.55991	3.14405	2.72877	2.76353	-1.36563	0.236988	0.996384
SER-GLYSYN-PWY: superpathway of L-serine and glycine biosynthesis I|g__Lachnospiraceae_noname.s__Lachnospiraceae_bacterium_7_1_58FAA	0.581255	0.40604	0.808568	0.853659	-1.0003	0.237167	0.996384
PWY-7111: pyruvate fermentation to isobutanol (engineered)|g__Blautia.s__Ruminococcus_torques	4.64635	3.79139	3.59267	3.63366	-1.07743	0.23782	0.996384
VALSYN-PWY: L-valine biosynthesis|g__Blautia.s__Ruminococcus_torques	4.64635	3.79139	3.59267	3.63366	-1.07743	0.23782	0.996384
PWY0-1586: peptidoglycan maturation (meso-diaminopimelate containing)|g__Parabacteroides.s__Parabacteroides_merdae	2.99906	3.42269	5.27919	4.54231	1.13909	0.2386	0.996384
PWY-7316: dTDP-N-acetylviosamine biosynthesis	3.0235	2.46004	2.11886	1.66319	1.3026	0.238898	0.996384
PWY-7316: dTDP-N-acetylviosamine biosynthesis|unclassified	2.92189	2.40023	2.02596	1.60286	1.2994	0.238898	0.996384
PWY-5695: urate biosynthesis/inosine 5'-phosphate degradation|g__Alistipes.s__Alistipes_shahii	1.58544	1.9479	2.44239	2.42292	1.83409	0.238961	0.996384
PWY-6385: peptidoglycan biosynthesis III (mycobacteria)|unclassified	55.4799	59.9926	56.1708	55.6093	0.749547	0.240065	0.996384
PWY-7383: anaerobic energy metabolism (invertebrates, cytosol)|unclassified	20.7101	23.2689	24.0153	21.9629	0.342779	0.240065	0.996384
PWY-5097: L-lysine biosynthesis VI|g__Bacteroides.s__Bacteroides_thetaiotaomicron	3.01286	3.8371	3.77552	6.08545	-1.00142	0.240564	0.996384
PWY0-1296: purine ribonucleosides degradation|g__Eubacterium.s__Eubacterium_rectale	30.8633	16.3779	33.7552	22.0072	-1.62306	0.240925	0.996384
PWY-5690: TCA cycle II (plants and fungi)|unclassified	6.34743	7.95416	5.03953	6.1112	0.572165	0.241287	0.996384
COA-PWY-1: coenzyme A biosynthesis II (mammalian)|g__Bacteroides.s__Bacteroides_caccae	3.61943	3.75539	3.80221	3.26725	0.677197	0.242676	0.996384
PWY-6123: inosine-5'-phosphate biosynthesis I|g__Collinsella.s__Collinsella_aerofaciens	3.48285	3.27926	4.05186	4.94709	-3.93861	0.244337	0.996384
PWY-6122: 5-aminoimidazole ribonucleotide biosynthesis II|g__Adlercreutzia.s__Adlercreutzia_equolifaciens	0.495458	0.893028	0.647914	0.62567	2.00891	0.244694	0.996384
PWY-6277: superpathway of 5-aminoimidazole ribonucleotide biosynthesis|g__Adlercreutzia.s__Adlercreutzia_equolifaciens	0.495458	0.893028	0.647914	0.62567	2.00891	0.244694	0.996384
PANTO-PWY: phosphopantothenate biosynthesis I|g__Blautia.s__Ruminococcus_torques	3.24361	3.41437	2.31153	2.90404	-2.59508	0.245084	0.996384
PWY0-1296: purine ribonucleosides degradation|g__Blautia.s__Ruminococcus_torques	4.08695	3.56868	3.67768	3.41148	-1.12043	0.245084	0.996384
PWY-5686: UMP biosynthesis|g__Coprococcus.s__Coprococcus_comes	1.88308	1.38644	1.03509	1.25425	-2.29452	0.246496	0.996384
SULFATE-CYS-PWY: superpathway of sulfate assimilation and cysteine biosynthesis	9.32801	15.769	11.7368	6.35544	2.49033	0.247249	0.996384
FASYN-INITIAL-PWY: superpathway of fatty acid biosynthesis initiation (E. coli)|unclassified	37.1239	36.9283	31.0448	28.9012	0.691831	0.247491	0.996384
1CMET2-PWY: N10-formyl-tetrahydrofolate biosynthesis|g__Bacteroides.s__Bacteroides_caccae	3.22097	4.1446	3.12025	3.12485	0.936891	0.248098	0.996384
PWY-3841: folate transformations II|g__Lachnospiraceae_noname.s__Lachnospiraceae_bacterium_5_1_63FAA	1.10801	0.75818	0.785491	1.44783	-2.06737	0.248104	0.996384
PWY-7208: superpathway of pyrimidine nucleobases salvage|g__Bacteroides.s__Bacteroides_vulgatus	29.509	30.5876	25.5878	26.7721	0.696191	0.248354	0.996384
HISDEG-PWY: L-histidine degradation I|unclassified	11.1015	11.7425	8.96396	7.81985	3.19827	0.248567	0.996384
BRANCHED-CHAIN-AA-SYN-PWY: superpathway of branched amino acid biosynthesis|g__Bacteroides.s__Bacteroides_ovatus	7.42438	8.92622	10.0364	10.0079	0.939884	0.248719	0.996384
UNINTEGRATED|g__Clostridium.s__Clostridium_leptum	2519.52	2198.11	3567.98	2610.85	-3.39778	0.248911	0.996384
COA-PWY: coenzyme A biosynthesis I|g__Coprococcus.s__Coprococcus_comes	1.27601	1.13716	0.741047	1.03801	-1.8116	0.249482	0.996384
GLUCOSE1PMETAB-PWY: glucose and glucose-1-phosphate degradation	3.00983	11.1907	1.75793	1.79567	2.31402	0.249482	0.996384
NONOXIPENT-PWY: pentose phosphate pathway (non-oxidative branch)|g__Eubacterium.s__Eubacterium_rectale	39.8469	21.6277	49.0262	33.3136	-0.606053	0.251845	0.996384
PWY-6385: peptidoglycan biosynthesis III (mycobacteria)|g__Bacteroides.s__Bacteroides_thetaiotaomicron	2.90844	3.83727	3.68121	6.02647	-0.151028	0.251855	0.996384
DTDPRHAMSYN-PWY: dTDP-L-rhamnose biosynthesis I|g__Parabacteroides.s__Parabacteroides_merdae	3.99821	4.33889	6.41002	5.47303	0.0673512	0.253594	0.996384
BRANCHED-CHAIN-AA-SYN-PWY: superpathway of branched amino acid biosynthesis|g__Coprococcus.s__Coprococcus_comes	2.40644	1.64104	1.47815	1.601	-1.98851	0.254262	0.996384
HISDEG-PWY: L-histidine degradation I|g__Bacteroides.s__Bacteroides_thetaiotaomicron	2.4802	3.44803	3.43421	5.01693	-0.00934146	0.25427	0.996384
PWY-5345: superpathway of L-methionine biosynthesis (by sulfhydrylation)	9.99379	17.8823	13.5726	7.6311	2.49973	0.254832	0.996384
HISTSYN-PWY: L-histidine biosynthesis|unclassified	38.3007	42.2196	41.7544	40.4299	0.742744	0.255074	0.996384
PWY-7197: pyrimidine deoxyribonucleotide phosphorylation	121.908	130.408	126.834	122.26	0.151723	0.255074	0.996384
PWY-7221: guanosine ribonucleotides de novo biosynthesis|unclassified	78.7546	82.1111	80.3838	77.3854	0.0660074	0.255074	0.996384
PWYG-321: mycolate biosynthesis	110.751	125.081	117.74	116.875	0.194324	0.255074	0.996384
TRNA-CHARGING-PWY: tRNA charging|unclassified	83.7981	87.4397	81.9956	77.4191	0.736234	0.255074	0.996384
P164-PWY: purine nucleobases degradation I (anaerobic)|unclassified	14.3467	14.4534	13.1482	14.8199	-2.85879	0.25641	0.996384
PWY-621: sucrose degradation III (sucrose invertase)|g__Anaerostipes.s__Anaerostipes_hadrus	0.933988	0.831647	1.38238	1.35035	1.55394	0.257394	0.996384
ANAGLYCOLYSIS-PWY: glycolysis III (from glucose)|g__Blautia.s__Ruminococcus_obeum	2.16999	1.41133	2.51973	3.30243	-0.59365	0.261161	0.996384
PWY-7664: oleate biosynthesis IV (anaerobic)	83.6377	96.9118	89.0502	88.8954	0.213345	0.262813	0.996384
PWY-6859: all-trans-farnesol biosynthesis	2.02706	5.23235	1.29403	1.73075	0.921479	0.263691	0.996384
PEPTIDOGLYCANSYN-PWY: peptidoglycan biosynthesis I (meso-diaminopimelate containing)|g__Bacteroides.s__Bacteroides_vulgatus	32.0865	32.95	28.1874	29.2636	0.39237	0.263906	0.996384
COA-PWY-1: coenzyme A biosynthesis II (mammalian)|g__Coprococcus.s__Coprococcus_comes	1.29728	1.00274	0.68509	1.05778	-1.56173	0.265477	0.996384
PWY-5097: L-lysine biosynthesis VI|g__Adlercreutzia.s__Adlercreutzia_equolifaciens	0.317297	0.580231	0.539346	0.429538	1.23299	0.265477	0.996384
PWY-5103: L-isoleucine biosynthesis III|g__Clostridium.s__Clostridium_leptum	1.07211	0.845482	1.83551	0.92581	-2.59397	0.266067	0.996384
DTDPRHAMSYN-PWY: dTDP-L-rhamnose biosynthesis I|g__Eubacterium.s__Eubacterium_hallii	1.01722	1.59579	2.15712	2.48092	1.35742	0.268422	0.996384
PWY-7208: superpathway of pyrimidine nucleobases salvage|g__Bacteroides.s__Bacteroides_xylanisolvens	2.78214	2.22342	1.0521	1.80773	-2.45529	0.268566	0.996384
PWY-6122: 5-aminoimidazole ribonucleotide biosynthesis II|g__Eubacterium.s__Eubacterium_hallii	0.854657	1.16325	1.64877	1.81962	1.27515	0.26923	0.996384
PWY-6277: superpathway of 5-aminoimidazole ribonucleotide biosynthesis|g__Eubacterium.s__Eubacterium_hallii	0.854657	1.16325	1.64877	1.81962	1.27515	0.26923	0.996384
P42-PWY: incomplete reductive TCA cycle|unclassified	4.62398	4.96288	6.3196	5.73729	2.43205	0.270301	0.996384
PANTO-PWY: phosphopantothenate biosynthesis I|unclassified	40.4068	44.741	40.4034	42.9786	0.654801	0.27071	0.996384
PWY-6703: preQ0 biosynthesis	274.333	284.002	252.717	249.998	0.113425	0.27071	0.996384
PWY-7219: adenosine ribonucleotides de novo biosynthesis|unclassified	164.104	173.831	166.036	162.361	0.109399	0.27071	0.996384
THRESYN-PWY: superpathway of L-threonine biosynthesis|unclassified	34.2064	36.2781	35.8451	34.046	0.661255	0.27071	0.996384
PANTO-PWY: phosphopantothenate biosynthesis I|g__Eubacterium.s__Eubacterium_hallii	1.32507	1.97767	2.6626	2.92337	1.15261	0.270942	0.996384
ILEUSYN-PWY: L-isoleucine biosynthesis I (from threonine)|g__Bacteroides.s__Bacteroides_ovatus	8.13236	10.1038	10.9546	10.4006	1.01279	0.271969	0.996384
PWY-7208: superpathway of pyrimidine nucleobases salvage|g__Bacteroides.s__Bacteroides_caccae	4.74383	4.91608	4.80983	3.97577	0.484931	0.274186	0.996384
PWY-1269: CMP-3-deoxy-D-manno-octulosonate biosynthesis I|g__Alistipes.s__Alistipes_putredinis	8.9879	9.14016	7.73328	7.64515	0.565793	0.274432	0.996384
PWY0-1586: peptidoglycan maturation (meso-diaminopimelate containing)|g__Eubacterium.s__Eubacterium_rectale	32.1776	17.4775	39.2271	28.7291	-0.0954658	0.27583	0.996384
PWY-5103: L-isoleucine biosynthesis III|g__Flavonifractor.s__Flavonifractor_plautii	0.443467	0.406759	0.376137	0.60382	-0.0419661	0.277585	0.996384
ASPASN-PWY: superpathway of L-aspartate and L-asparagine biosynthesis|g__Bacteroides.s__Bacteroides_caccae	3.83	4.28165	3.48593	3.55007	1.57132	0.278308	0.996384
PWY-5367: petroselinate biosynthesis	62.0032	34.0066	67.4755	50.4226	0.238543	0.278766	0.996384
PWY-5941: glycogen degradation II (eukaryotic)|unclassified	20.3255	21.2978	18.2305	17.6823	1.01896	0.278766	0.996384
PWY-6527: stachyose degradation|unclassified	39.1227	43.7811	37.3872	36.9561	1.1567	0.278766	0.996384
PWY-7315: dTDP-N-acetylthomosamine biosynthesis|g__Eubacterium.s__Eubacterium_hallii	1.24743	1.56195	2.45924	2.57013	0.92954	0.27901	0.996384
PWY-6121: 5-aminoimidazole ribonucleotide biosynthesis I|g__Bacteroides.s__Bacteroides_dorei	5.95894	7.64503	5.81721	6.00513	0.237831	0.280478	0.996384
BRANCHED-CHAIN-AA-SYN-PWY: superpathway of branched amino acid biosynthesis|g__Clostridium.s__Clostridium_leptum	1.13528	0.894914	1.93542	1.06578	-2.67822	0.282472	0.996384
PWY-6121: 5-aminoimidazole ribonucleotide biosynthesis I|g__Coprococcus.s__Coprococcus_comes	2.52911	1.86369	1.69774	1.77333	-0.57911	0.282472	0.996384
PWY-5686: UMP biosynthesis|g__Lachnospiraceae_noname.s__Lachnospiraceae_bacterium_5_1_63FAA	1.31574	1.00367	0.907757	1.43217	-0.961995	0.282649	0.996384
PWY0-845: superpathway of pyridoxal 5'-phosphate biosynthesis and salvage|g__Bacteroides.s__Bacteroides_caccae	3.94959	4.55506	3.81765	3.39889	-0.207515	0.282776	0.996384
VALSYN-PWY: L-valine biosynthesis|g__Bifidobacterium.s__Bifidobacterium_longum	2.84056	3.50956	7.77933	3.90736	0.4456	0.282776	0.996384
PYRIDOXSYN-PWY: pyridoxal 5'-phosphate biosynthesis I|g__Bacteroides.s__Bacteroides_uniformis	31.0573	27.7187	41.2726	39.8608	0.975128	0.284238	0.996384
PWY-6386: UDP-N-acetylmuramoyl-pentapeptide biosynthesis II (lysine-containing)|g__Bacteroides.s__Bacteroides_thetaiotaomicron	2.98388	4.062	3.86513	6.28249	-0.117103	0.284703	0.996384
ARO-PWY: chorismate biosynthesis I|g__Blautia.s__Ruminococcus_obeum	1.20549	0.52438	1.29998	2.07353	-1.0125	0.285724	0.996384
NONOXIPENT-PWY: pentose phosphate pathway (non-oxidative branch)|g__Dorea.s__Dorea_formicigenerans	0.317122	0.346778	0.448264	0.487122	-1.43546	0.286446	0.996384
MET-SAM-PWY: superpathway of S-adenosyl-L-methionine biosynthesis|unclassified	30.5191	33.3745	31.1888	30.434	0.732016	0.28698	0.996384
PWY-6703: preQ0 biosynthesis|unclassified	26.5669	29.7608	30.526	27.2241	-0.0550376	0.28698	0.996384
PWY-7211: superpathway of pyrimidine deoxyribonucleotides de novo biosynthesis	85.5747	86.5657	88.3135	77.0785	0.0840634	0.28698	0.996384
PWY-7539: 6-hydroxymethyl-dihydropterin diphosphate biosynthesis III (Chlamydia)	139.554	151.713	129.087	125.82	0.16606	0.28698	0.996384
PWY0-862: (5Z)-dodec-5-enoate biosynthesis	77.1158	90.1679	82.4855	82.2995	0.224658	0.28698	0.996384
PWY66-400: glycolysis VI (metazoan)	434.013	443.42	416.657	416.622	0.0403603	0.28698	0.996384
TRPSYN-PWY: L-tryptophan biosynthesis|unclassified	30.4197	34.4632	33.6233	33.2936	0.19899	0.28698	0.996384
PWY-6163: chorismate biosynthesis from 3-dehydroquinate|g__Eubacterium.s__Eubacterium_rectale	31.2468	16.6519	35.6484	24.6118	-0.11788	0.287239	0.996384
PWY-6386: UDP-N-acetylmuramoyl-pentapeptide biosynthesis II (lysine-containing)|g__Eubacterium.s__Eubacterium_rectale	29.2526	15.5364	34.5981	23.7796	-0.250924	0.287239	0.996384
PWY-5484: glycolysis II (from fructose 6-phosphate)|g__Bacteroides.s__Bacteroides_thetaiotaomicron	3.74476	4.82236	4.55593	7.23343	-0.640757	0.287923	0.996384
PWY0-1298: superpathway of pyrimidine deoxyribonucleosides degradation|unclassified	18.962	20.6267	18.6177	17.9289	0.289567	0.288467	0.996384
PWY0-1296: purine ribonucleosides degradation|g__Dorea.s__Dorea_formicigenerans	0.643771	0.764404	0.657793	0.890431	-2.46961	0.29309	0.996384
UNINTEGRATED|g__Bacteroides.s__Bacteroides_xylanisolvens	5459.76	4717.51	3153.92	4038.94	-4.34917	0.293372	0.996384
ANAGLYCOLYSIS-PWY: glycolysis III (from glucose)|g__Parabacteroides.s__Parabacteroides_distasonis	8.96206	6.4247	5.04951	3.1424	-0.195028	0.295138	0.996384
COA-PWY-1: coenzyme A biosynthesis II (mammalian)|g__Eubacterium.s__Eubacterium_hallii	0.429684	0.733995	1.21159	1.38564	2.60247	0.295138	0.996384
PWY-7221: guanosine ribonucleotides de novo biosynthesis|g__Clostridium.s__Clostridium_leptum	0.8588	0.638438	1.62795	1.04108	-2.21339	0.295218	0.996384
BRANCHED-CHAIN-AA-SYN-PWY: superpathway of branched amino acid biosynthesis|g__Flavonifractor.s__Flavonifractor_plautii	0.497301	0.469979	0.418128	0.654753	0.0477567	0.295269	0.996384
PWY-7208: superpathway of pyrimidine nucleobases salvage	208.03	224.879	200.783	193.671	0.129848	0.295352	0.996384
PYRIDNUCSYN-PWY: NAD biosynthesis I (from aspartate)|unclassified	23.2314	26.2328	24.1265	23.1469	0.648569	0.295352	0.996384
PWY-5097: L-lysine biosynthesis VI|g__Eubacterium.s__Eubacterium_rectale	35.2125	17.5668	40.2726	26.8481	-0.642635	0.29563	0.996384
PWY-5103: L-isoleucine biosynthesis III|g__Coprococcus.s__Coprococcus_comes	2.24059	1.54685	1.4146	1.4914	-1.91409	0.295636	0.996384
PWY-6700: queuosine biosynthesis|g__Bacteroides.s__Bacteroides_vulgatus	32.8238	36.1727	27.8449	30.6789	0.567859	0.296767	0.996384
ANAGLYCOLYSIS-PWY: glycolysis III (from glucose)|g__Bacteroides.s__Bacteroides_thetaiotaomicron	4.24291	5.24463	5.01574	7.67915	-0.47277	0.29942	0.996384
PWY-6124: inosine-5'-phosphate biosynthesis II|g__Collinsella.s__Collinsella_aerofaciens	3.26426	3.12222	3.99154	4.55603	-2.36826	0.30026	0.996384
PWY-6590: superpathway of Clostridium acetobutylicum acidogenic fermentation|unclassified	13.3785	15.3989	14.0135	14.1434	-0.202014	0.301118	0.996384
HISTSYN-PWY: L-histidine biosynthesis|g__Alistipes.s__Alistipes_shahii	1.38745	1.84095	2.02522	1.84972	0.59489	0.301165	0.996384
ILEUSYN-PWY: L-isoleucine biosynthesis I (from threonine)|g__Bifidobacterium.s__Bifidobacterium_longum	2.75297	3.443	7.77933	3.86096	1.45464	0.301165	0.996384
PWY-7219: adenosine ribonucleotides de novo biosynthesis|g__Alistipes.s__Alistipes_shahii	1.9819	2.66585	2.81399	2.57591	-0.0444045	0.302077	0.996384
PWY-7229: superpathway of adenosine nucleotides de novo biosynthesis I|g__Parabacteroides.s__Parabacteroides_merdae	3.35659	3.67274	5.98382	5.69679	0.660788	0.302456	0.996384
PWY-5347: superpathway of L-methionine biosynthesis (transsulfuration)|unclassified	27.9747	31.1358	28.7473	28.4392	0.688718	0.303885	0.996384
PWY-7229: superpathway of adenosine nucleotides de novo biosynthesis I	364.345	364.143	352.53	342.601	0.0354825	0.303885	0.996384
PWY-724: superpathway of L-lysine, L-threonine and L-methionine biosynthesis II|unclassified	43.854	46.4765	45.6455	43.48	0.685326	0.303885	0.996384
PWY-7663: gondoate biosynthesis (anaerobic)	204.619	219.72	199.5	194.338	0.121964	0.303885	0.996384
PWY-6122: 5-aminoimidazole ribonucleotide biosynthesis II|g__Alistipes.s__Alistipes_shahii	2.09099	2.23188	2.79376	2.49346	0.974387	0.303925	0.996384
PWY-6277: superpathway of 5-aminoimidazole ribonucleotide biosynthesis|g__Alistipes.s__Alistipes_shahii	2.09099	2.23188	2.79376	2.49346	0.974387	0.303925	0.996384
ANAGLYCOLYSIS-PWY: glycolysis III (from glucose)|g__Bacteroides.s__Bacteroides_dorei	8.19739	10.4611	7.25022	7.88318	1.05047	0.304006	0.996384
PWY-6803: phosphatidylcholine acyl editing	1.73344	5.48475	1.47188	1.03553	2.62819	0.304006	0.996384
PWY-5367: petroselinate biosynthesis|g__Eubacterium.s__Eubacterium_rectale	32.6725	16.6626	37.0057	25.444	-0.287893	0.304184	0.996384
PWY-7229: superpathway of adenosine nucleotides de novo biosynthesis I|g__Flavonifractor.s__Flavonifractor_plautii	0.524908	0.411618	0.416389	0.710042	-1.35034	0.304387	0.996384
PWY-6385: peptidoglycan biosynthesis III (mycobacteria)|g__Eubacterium.s__Eubacterium_eligens	6.54718	4.38287	3.15297	3.60196	-1.5186	0.304423	0.996384
PWY-6545: pyrimidine deoxyribonucleotides de novo biosynthesis III|unclassified	10.5402	12.1507	7.90127	10.121	-1.06885	0.304557	0.996384
PWY-6387: UDP-N-acetylmuramoyl-pentapeptide biosynthesis I (meso-diaminopimelate containing)|g__Bacteroides.s__Bacteroides_vulgatus	33.3087	33.9984	29.4354	30.2054	0.672007	0.305065	0.996384
HEMESYN2-PWY: heme biosynthesis II (anaerobic)	8.67	11.3628	8.50544	7.61672	0.646303	0.305385	0.996384
HISDEG-PWY: L-histidine degradation I|g__Bacteroides.s__Bacteroides_vulgatus	30.1876	32.5661	28.6618	28.0367	1.29138	0.305385	0.996384
COBALSYN-PWY: adenosylcobalamin salvage from cobinamide I|g__Faecalibacterium.s__Faecalibacterium_prausnitzii	11.3007	11.1501	8.10494	8.55851	-1.35641	0.30829	0.996384
PWY-6121: 5-aminoimidazole ribonucleotide biosynthesis I|g__Alistipes.s__Alistipes_putredinis	9.96331	10.7381	9.08434	9.18701	0.559852	0.30829	0.996384
PWY-5154: L-arginine biosynthesis III (via N-acetyl-L-citrulline)|unclassified	8.52344	10.8751	8.32765	7.58916	1.69848	0.309661	0.996384
PWY-6385: peptidoglycan biosynthesis III (mycobacteria)|g__Dorea.s__Dorea_longicatena	1.57326	0.667577	1.10898	1.00373	-0.984794	0.311651	0.996384
PWY-6147: 6-hydroxymethyl-dihydropterin diphosphate biosynthesis I	143.572	156.826	133.171	129.764	0.168694	0.312576	0.996384
PWY-6386: UDP-N-acetylmuramoyl-pentapeptide biosynthesis II (lysine-containing)|g__Eubacterium.s__Eubacterium_eligens	6.3749	4.40226	3.15481	3.61157	-1.47444	0.313382	0.996384
PWY-6305: putrescine biosynthesis IV|g__Clostridium.s__Clostridium_leptum	0.922624	0.751937	1.62485	1.28836	-2.14668	0.313817	0.996384
PWY-7219: adenosine ribonucleotides de novo biosynthesis|g__Blautia.s__Ruminococcus_torques	5.06728	4.70607	4.63528	4.29557	-1.18061	0.314102	0.996384
PWY-6147: 6-hydroxymethyl-dihydropterin diphosphate biosynthesis I|g__Parabacteroides.s__Parabacteroides_merdae	2.91167	3.55887	5.61339	5.0595	-0.0509038	0.317169	0.996384
PWY-7111: pyruvate fermentation to isobutanol (engineered)|g__Clostridium.s__Clostridium_leptum	1.1127	0.898745	1.79735	0.907601	-1.69742	0.318277	0.996384
CALVIN-PWY: Calvin-Benson-Bassham cycle|g__Eubacterium.s__Eubacterium_hallii	1.09521	1.5221	2.76892	2.96443	1.73172	0.319423	0.996384
PWY-7111: pyruvate fermentation to isobutanol (engineered)|g__Bacteroides.s__Bacteroides_xylanisolvens	3.56476	2.70673	1.65191	2.30984	-2.73946	0.319998	0.996384
GALACTARDEG-PWY: D-galactarate degradation I	8.38054	12.9373	9.82133	9.82973	0.00867981	0.321426	0.996384
GLUCARGALACTSUPER-PWY: superpathway of D-glucarate and D-galactarate degradation	8.38054	12.9373	9.82133	9.82973	0.00867981	0.321426	0.996384
P161-PWY: acetylene degradation|unclassified	25.1828	27.8128	27.716	27.0391	0.731133	0.321426	0.996384
PWY-5104: L-isoleucine biosynthesis IV	60.26	68.5235	66.7397	74.3343	0.136084	0.321426	0.996384
UNINTEGRATED|unclassified	150189	152222	145558	142815	0.0440977	0.321426	0.996384
COMPLETE-ARO-PWY: superpathway of aromatic amino acid biosynthesis|g__Eubacterium.s__Eubacterium_rectale	29.8368	15.8312	34.4018	23.6082	-0.0978196	0.321781	0.996384
PWY-6385: peptidoglycan biosynthesis III (mycobacteria)|g__Eubacterium.s__Eubacterium_rectale	28.3514	14.9654	33.0032	22.9725	0.0689413	0.321781	0.996384
PWY-6387: UDP-N-acetylmuramoyl-pentapeptide biosynthesis I (meso-diaminopimelate containing)|g__Eubacterium.s__Eubacterium_rectale	27.9349	14.8238	32.676	22.5889	-0.247398	0.321781	0.996384
ANAGLYCOLYSIS-PWY: glycolysis III (from glucose)|g__Bacteroides.s__Bacteroides_vulgatus	35.5699	36.7394	31.1135	31.3177	0.48817	0.322444	0.996384
PWY-6387: UDP-N-acetylmuramoyl-pentapeptide biosynthesis I (meso-diaminopimelate containing)|g__Eubacterium.s__Eubacterium_eligens	6.16834	4.27037	3.05985	3.47682	-1.48065	0.322513	0.996384
PWY-7228: superpathway of guanosine nucleotides de novo biosynthesis I|unclassified	20.1886	24.1313	20.8108	23.6515	-1.84011	0.322817	0.996384
PWY-5464: superpathway of cytosolic glycolysis (plants), pyruvate dehydrogenase and TCA cycle	12.4053	14.1235	11.9622	14.6329	-1.28638	0.32292	0.996384
ANAGLYCOLYSIS-PWY: glycolysis III (from glucose)|g__Eubacterium.s__Eubacterium_hallii	0.889224	1.36717	2.01409	2.25736	2.14984	0.32349	0.996384
PWY-6122: 5-aminoimidazole ribonucleotide biosynthesis II|g__Alistipes.s__Alistipes_putredinis	9.6307	10.1631	8.6701	8.6805	0.547865	0.326214	0.996384
PWY-6277: superpathway of 5-aminoimidazole ribonucleotide biosynthesis|g__Alistipes.s__Alistipes_putredinis	9.6307	10.1631	8.6701	8.6805	0.547865	0.326214	0.996384
ANAGLYCOLYSIS-PWY: glycolysis III (from glucose)|g__Bacteroides.s__Bacteroides_xylanisolvens	2.99644	3.08872	1.56003	1.66585	-2.88773	0.328818	0.996384
PWY-5103: L-isoleucine biosynthesis III|g__Lachnospiraceae_noname.s__Lachnospiraceae_bacterium_7_1_58FAA	0.717367	0.627502	1.13222	0.962374	1.79674	0.329095	0.996384
PWY-6126: superpathway of adenosine nucleotides de novo biosynthesis II|g__Parabacteroides.s__Parabacteroides_merdae	3.10036	3.38236	5.63905	5.40877	0.643107	0.329095	0.996384
PWY-4041: &gamma;-glutamyl cycle	1.83756	6.14656	1.12185	1.36372	1.99167	0.330356	0.996384
GLUCONEO-PWY: gluconeogenesis I|unclassified	34.3319	38.8597	37.6948	35.3827	0.757271	0.330436	0.996384
PWY-6282: palmitoleate biosynthesis I (from (5Z)-dodec-5-enoate)	79.6391	89.8837	84.8865	83.094	0.197286	0.330436	0.996384
PWY-6876: isopropanol biosynthesis	11.4014	12.1011	15.2501	16.4679	-0.23719	0.330436	0.996384
PWY-7388: octanoyl-[acyl-carrier protein] biosynthesis (mitochondria, yeast)|unclassified	32.7784	32.2315	27.6234	25.4427	0.648819	0.330436	0.996384
SALVADEHYPOX-PWY: adenosine nucleotides degradation II	27.5456	38.3919	30.1131	25.4149	0.960714	0.330436	0.996384
ARO-PWY: chorismate biosynthesis I|g__Eubacterium.s__Eubacterium_rectale	29.3441	15.5813	33.8952	23.2735	-0.0889914	0.330823	0.996384
ASPASN-PWY: superpathway of L-aspartate and L-asparagine biosynthesis|g__Roseburia.s__Roseburia_intestinalis	1.36162	0.675352	2.22063	2.10652	-2.01914	0.331906	0.996384
PWY-2942: L-lysine biosynthesis III|g__Bacteroides.s__Bacteroides_caccae	4.07866	4.54436	3.83155	3.84199	0.874797	0.332704	0.996384
PWY-6737: starch degradation V|g__Eubacterium.s__Eubacterium_hallii	1.31359	1.25057	1.9581	2.39463	-1.75309	0.335733	0.996384
UNINTEGRATED|g__Coprococcus.s__Coprococcus_comes	2980.7	2340.2	2085.42	2400.49	-1.15496	0.335733	0.996384
PWY0-1586: peptidoglycan maturation (meso-diaminopimelate containing)|g__Anaerostipes.s__Anaerostipes_hadrus	0.645738	0.693221	0.809465	0.619753	0.676656	0.336422	0.996384
PWY-5695: urate biosynthesis/inosine 5'-phosphate degradation|g__Bacteroides.s__Bacteroides_ovatus	8.81865	9.12415	9.70749	10.5917	0.463408	0.336543	0.996384
PWY-7111: pyruvate fermentation to isobutanol (engineered)|g__Eubacterium.s__Eubacterium_siraeum	6.33525	6.80095	7.79173	3.16316	1.14328	0.33839	0.996384
GLUTORN-PWY: L-ornithine biosynthesis|g__Dorea.s__Dorea_longicatena	1.62087	0.874258	1.32518	1.27149	-1.67514	0.3386	0.996384
GLYCOLYSIS: glycolysis I (from glucose 6-phosphate)|g__Bacteroides.s__Bacteroides_caccae	4.31832	5.27131	4.23389	4.04547	0.209302	0.3386	0.996384
PWY-1042: glycolysis IV (plant cytosol)|g__Bacteroides.s__Bacteroides_xylanisolvens	5.31551	5.62236	2.69317	3.73839	-2.20843	0.3386	0.996384
PWY0-1296: purine ribonucleosides degradation|g__Clostridium.s__Clostridium_leptum	1.02307	0.70158	1.6871	0.94556	-1.98353	0.338822	0.996384
HOMOSER-METSYN-PWY: L-methionine biosynthesis I|unclassified	21.6181	23.9365	22.2095	22.6656	0.685205	0.339605	0.996384
PWY-1042: glycolysis IV (plant cytosol)|unclassified	79.7643	83.9349	83.0846	78.8319	0.719062	0.339605	0.996384
PWY-1269: CMP-3-deoxy-D-manno-octulosonate biosynthesis I	50.4319	59.2906	46.2679	46.7722	0.199619	0.339605	0.996384
PWY-5695: urate biosynthesis/inosine 5'-phosphate degradation	413.629	412.062	394.502	383.127	0.0445071	0.339605	0.996384
PWY-6897: thiamin salvage II	119.07	132.361	124.325	118.166	0.174802	0.339605	0.996384
COBALSYN-PWY: adenosylcobalamin salvage from cobinamide I|g__Eubacterium.s__Eubacterium_rectale	25.7867	13.2815	29.8454	20.3994	-0.142739	0.340029	0.996384
PWY-1269: CMP-3-deoxy-D-manno-octulosonate biosynthesis I|unclassified	6.51626	6.11179	6.21091	5.32614	-1.07971	0.340029	0.996384
PWY-5484: glycolysis II (from fructose 6-phosphate)|g__Parabacteroides.s__Parabacteroides_distasonis	9.44734	6.64883	5.2583	3.06845	-0.219754	0.341228	0.996384
PWY-7111: pyruvate fermentation to isobutanol (engineered)|g__Flavonifractor.s__Flavonifractor_plautii	0.611064	0.566489	0.486322	0.778527	-0.332678	0.341559	0.996384
THRESYN-PWY: superpathway of L-threonine biosynthesis|g__Alistipes.s__Alistipes_onderdonkii	4.49482	6.94251	7.18491	10.4132	1.5678	0.342085	0.996384
PWY-2942: L-lysine biosynthesis III|g__Eubacterium.s__Eubacterium_hallii	0.700805	1.03739	1.64835	1.75471	1.008	0.342968	0.996384
PWY-7663: gondoate biosynthesis (anaerobic)|g__Bacteroides.s__Bacteroides_dorei	9.32216	10.8015	9.72745	9.15953	-0.67984	0.343789	0.996384
1CMET2-PWY: N10-formyl-tetrahydrofolate biosynthesis|g__Eubacterium.s__Eubacterium_rectale	25.8291	14.0002	30.3876	21.1964	-0.282042	0.344226	0.996384
PANTO-PWY: phosphopantothenate biosynthesis I|g__Eubacterium.s__Eubacterium_rectale	28.0427	14.8161	33.5075	22.6915	-0.161188	0.344226	0.996384
PWY-5484: glycolysis II (from fructose 6-phosphate)|g__Bacteroides.s__Bacteroides_caccae	4.45163	5.53958	4.48584	4.44139	0.172859	0.345201	0.996384
ARG+POLYAMINE-SYN: superpathway of arginine and polyamine biosynthesis|unclassified	12.7411	12.1605	10.5248	11.1804	-1.5891	0.34557	0.996384
PWY-6317: galactose degradation I (Leloir pathway)|g__Anaerostipes.s__Anaerostipes_hadrus	1.06877	0.990471	1.67505	1.53142	1.06187	0.346078	0.996384
PWY-2942: L-lysine biosynthesis III|g__Bacteroides.s__Bacteroides_thetaiotaomicron	3.24036	4.19768	3.9612	6.43269	-0.631076	0.34686	0.996384
PWY-6703: preQ0 biosynthesis|g__Parabacteroides.s__Parabacteroides_merdae	2.80146	3.52778	5.15974	4.93592	-0.0244255	0.347674	0.996384
BRANCHED-CHAIN-AA-SYN-PWY: superpathway of branched amino acid biosynthesis|g__Bifidobacterium.s__Bifidobacterium_longum	2.50132	2.95095	7.16351	3.51301	1.28993	0.34814	0.996384
P562-PWY: myo-inositol degradation I|unclassified	1.05426	1.5606	1.08557	0.861276	1.87806	0.34814	0.996384
PWY-5103: L-isoleucine biosynthesis III|g__Bifidobacterium.s__Bifidobacterium_longum	2.35141	2.72217	6.87236	3.30096	1.25494	0.34814	0.996384
ARGSYN-PWY: L-arginine biosynthesis I (via L-ornithine)	316.02	322.84	337.769	331.475	0.0569459	0.348932	0.996384
PWY-5686: UMP biosynthesis|g__Eubacterium.s__Eubacterium_rectale	32.2305	17.1383	38.7743	26.9728	-0.228518	0.349397	0.996384
PWY-6151: S-adenosyl-L-methionine cycle I|g__Eubacterium.s__Eubacterium_rectale	29.5011	14.369	33.1863	22.4012	-0.212772	0.349397	0.996384
PWY-6387: UDP-N-acetylmuramoyl-pentapeptide biosynthesis I (meso-diaminopimelate containing)|g__Dorea.s__Dorea_longicatena	1.5473	0.672676	1.08092	0.944503	-0.955234	0.349955	0.996384
PWY-7220: adenosine deoxyribonucleotides de novo biosynthesis II|g__Parabacteroides.s__Parabacteroides_distasonis	7.59412	5.77083	4.32574	2.82079	-0.223765	0.350971	0.996384
PWY-7222: guanosine deoxyribonucleotides de novo biosynthesis II|g__Parabacteroides.s__Parabacteroides_distasonis	7.59412	5.77083	4.32574	2.82079	-0.223765	0.350971	0.996384
PWY-6703: preQ0 biosynthesis|g__Bacteroides.s__Bacteroides_thetaiotaomicron	2.37768	3.71049	3.06696	5.50227	-0.697455	0.351633	0.996384
PWY-7219: adenosine ribonucleotides de novo biosynthesis|g__Adlercreutzia.s__Adlercreutzia_equolifaciens	0.640449	1.00662	0.786158	0.671655	1.42968	0.351633	0.996384
PWY-7221: guanosine ribonucleotides de novo biosynthesis|g__Blautia.s__Ruminococcus_torques	1.49965	1.10908	1.171	1.34379	-1.13872	0.351633	0.996384
COA-PWY: coenzyme A biosynthesis I|g__Eubacterium.s__Eubacterium_hallii	0.474879	0.72559	1.25396	1.38386	2.58408	0.353526	0.996384
P108-PWY: pyruvate fermentation to propanoate I|g__Bacteroides.s__Bacteroides_thetaiotaomicron	3.26547	4.37723	3.8854	5.57546	-1.28729	0.354344	0.996384
PWY-6386: UDP-N-acetylmuramoyl-pentapeptide biosynthesis II (lysine-containing)|g__Blautia.s__Ruminococcus_torques	3.79531	3.40019	2.99312	2.9255	-1.31736	0.354513	0.996384
PWY-7184: pyrimidine deoxyribonucleotides de novo biosynthesis I|unclassified	12.9961	14.4586	11.6525	13.8236	-1.05292	0.355017	0.996384
PWY-6595: superpathway of guanosine nucleotides degradation (plants)|unclassified	2.79922	2.73756	3.25842	3.77019	-0.902431	0.355446	0.996384
ASPASN-PWY: superpathway of L-aspartate and L-asparagine biosynthesis|g__Roseburia.s__Roseburia_inulinivorans	1.14436	1.05708	0.855894	0.558853	1.92361	0.355823	0.996384
PWY-2942: L-lysine biosynthesis III|g__Adlercreutzia.s__Adlercreutzia_equolifaciens	0.361266	0.625255	0.547877	0.425055	1.21713	0.355908	0.996384
P461-PWY: hexitol fermentation to lactate, formate, ethanol and acetate|g__Anaerostipes.s__Anaerostipes_hadrus	1.72329	1.37462	1.94468	1.91258	0.619402	0.358066	0.996384
PWY490-3: nitrate reduction VI (assimilatory)|unclassified	0.365942	0.393326	0.515184	0.669644	-2.1969	0.358066	0.996384
PWY-5097: L-lysine biosynthesis VI|unclassified	55.1156	58.3831	57.1174	53.1862	0.738779	0.358418	0.996384
PWY0-166: superpathway of pyrimidine deoxyribonucleotides de novo biosynthesis (E. coli)	191.111	198.919	190.397	188.699	0.0774616	0.358418	0.996384
COA-PWY-1: coenzyme A biosynthesis II (mammalian)|g__Eubacterium.s__Eubacterium_rectale	26.3659	13.8603	29.9814	20.5093	-1.20669	0.358927	0.996384
PWY-1042: glycolysis IV (plant cytosol)|g__Eubacterium.s__Eubacterium_hallii	2.12618	2.96458	3.70551	3.96502	0.470077	0.359585	0.996384
PWY-6527: stachyose degradation|g__Blautia.s__Ruminococcus_torques	2.75332	2.45512	2.15725	1.95216	-1.66562	0.359955	0.996384
PWY-6386: UDP-N-acetylmuramoyl-pentapeptide biosynthesis II (lysine-containing)|g__Dorea.s__Dorea_longicatena	1.77733	0.80185	1.20881	1.04206	-1.00912	0.359979	0.996384
SER-GLYSYN-PWY: superpathway of L-serine and glycine biosynthesis I|g__Dorea.s__Dorea_formicigenerans	0.46465	0.397222	0.685327	0.669992	-1.56042	0.363436	0.996384
COA-PWY-1: coenzyme A biosynthesis II (mammalian)|g__Alistipes.s__Alistipes_putredinis	11.2116	10.9389	9.26678	9.74108	0.432026	0.364051	0.996384
PWY-7392: taxadiene biosynthesis (engineered)	5.00134	8.11234	3.23509	4.73484	0.823191	0.364642	0.996384
PWY-7220: adenosine deoxyribonucleotides de novo biosynthesis II|g__Bacteroides.s__Bacteroides_dorei	8.46628	11.072	8.59519	8.17598	0.798751	0.365913	0.996384
PWY-7222: guanosine deoxyribonucleotides de novo biosynthesis II|g__Bacteroides.s__Bacteroides_dorei	8.46628	11.072	8.59519	8.17598	0.798751	0.365913	0.996384
BRANCHED-CHAIN-AA-SYN-PWY: superpathway of branched amino acid biosynthesis|g__Lachnospiraceae_noname.s__Lachnospiraceae_bacterium_7_1_58FAA	0.776795	0.704185	1.20408	1.05528	1.83819	0.366907	0.996384
FASYN-ELONG-PWY: fatty acid elongation -- saturated|unclassified	30.1295	31.4324	28.0456	26.7204	0.706949	0.368061	0.996384
PWY-3841: folate transformations II|unclassified	53.3653	59.5289	50.8177	48.789	0.684224	0.368061	0.996384
PWY-7003: glycerol degradation to butanol	38.3823	41.3961	41.8206	40.2515	0.730127	0.368061	0.996384
PWY-6147: 6-hydroxymethyl-dihydropterin diphosphate biosynthesis I|g__Collinsella.s__Collinsella_aerofaciens	4.62381	4.2211	4.91626	5.0273	-1.28136	0.368156	0.996384
DTDPRHAMSYN-PWY: dTDP-L-rhamnose biosynthesis I|g__Eubacterium.s__Eubacterium_rectale	29.2784	15.7436	34.9214	22.3188	-0.859636	0.368619	0.996384
PWY-7328: superpathway of UDP-glucose-derived O-antigen building blocks biosynthesis|unclassified	3.8905	3.96059	3.65032	3.15617	-0.209516	0.369838	0.996384
PWY-5097: L-lysine biosynthesis VI|g__Eubacterium.s__Eubacterium_hallii	0.670959	0.910515	1.49297	1.59271	1.30033	0.370063	0.996384
PWY-5659: GDP-mannose biosynthesis|g__Parabacteroides.s__Parabacteroides_distasonis	6.27141	4.70435	3.58922	2.31914	0.267305	0.370981	0.996384
PWY-6147: 6-hydroxymethyl-dihydropterin diphosphate biosynthesis I|g__Bacteroides.s__Bacteroides_thetaiotaomicron	3.47613	4.35015	4.03407	6.64185	-0.815266	0.371232	0.996384
PWY-6385: peptidoglycan biosynthesis III (mycobacteria)|g__Bacteroides.s__Bacteroides_ovatus	5.34704	7.27631	9.86712	10.1569	0.582988	0.373063	0.996384
UNINTEGRATED|g__Bacteroides.s__Bacteroides_stercoris	42785.8	45263.2	21767.9	27522.6	3.18868	0.37465	0.996384
PWY-6527: stachyose degradation|g__Clostridium.s__Clostridium_leptum	0.897873	0.734427	1.7341	1.05529	-1.78598	0.375017	0.996384
VALSYN-PWY: L-valine biosynthesis|g__Roseburia.s__Roseburia_hominis	1.51308	2.24239	0.569456	0.692633	-1.93989	0.375017	0.996384
GLUDEG-II-PWY: L-glutamate degradation VII (to butanoate)	5.11575	4.61864	2.22664	4.26313	-2.20362	0.375798	0.996384
PWY-1042: glycolysis IV (plant cytosol)|g__Roseburia.s__Roseburia_inulinivorans	2.37674	2.29878	1.60595	1.86384	-2.29964	0.375961	0.996384
DTDPRHAMSYN-PWY: dTDP-L-rhamnose biosynthesis I|g__Alistipes.s__Alistipes_finegoldii	3.05362	3.74547	4.3729	5.90916	0.564751	0.376092	0.996384
PANTO-PWY: phosphopantothenate biosynthesis I|g__Anaerostipes.s__Anaerostipes_hadrus	1.24216	1.04254	1.42773	1.03337	0.958152	0.376092	0.996384
VALSYN-PWY: L-valine biosynthesis|g__Anaerostipes.s__Anaerostipes_hadrus	1.18852	1.03219	1.56934	1.24937	0.710756	0.376092	0.996384
NONMEVIPP-PWY: methylerythritol phosphate pathway I|g__Bacteroides.s__Bacteroides_caccae	3.74801	4.40501	3.28106	3.52994	-0.24526	0.377841	0.996384
P108-PWY: pyruvate fermentation to propanoate I	225.171	230.511	214.687	217.148	0.0437606	0.377861	0.996384
PWY-7400: L-arginine biosynthesis IV (archaebacteria)	321.957	327.908	343.349	336.146	0.0569344	0.377861	0.996384
PWY-6285: superpathway of fatty acids biosynthesis (E. coli)|unclassified	7.67134	8.55275	4.74815	8.03604	-0.747773	0.378011	0.996384
TRPSYN-PWY: L-tryptophan biosynthesis|g__Parabacteroides.s__Parabacteroides_distasonis	6.15762	4.57175	3.64508	2.23269	0.583153	0.378446	0.996384
PWY-6270: isoprene biosynthesis I	30.4277	38.8051	32.0511	30.0542	0.0379711	0.379125	0.996384
PWY-7219: adenosine ribonucleotides de novo biosynthesis|g__Eubacterium.s__Eubacterium_rectale	48.6088	25.4817	54.3067	39.9655	-0.299435	0.379594	0.996384
ARGSYN-PWY: L-arginine biosynthesis I (via L-ornithine)|g__Coprococcus.s__Coprococcus_comes	1.96792	1.17365	1.3008	1.29556	-0.835635	0.380898	0.996384
GLUTORN-PWY: L-ornithine biosynthesis|g__Coprococcus.s__Coprococcus_comes	2.30785	1.29332	1.45685	1.32872	-1.49001	0.380898	0.996384
PWY-7400: L-arginine biosynthesis IV (archaebacteria)|g__Coprococcus.s__Coprococcus_comes	1.97911	1.18599	1.31074	1.30313	-0.835137	0.380898	0.996384
VALSYN-PWY: L-valine biosynthesis|g__Flavonifractor.s__Flavonifractor_plautii	0.653643	0.717174	0.569358	0.928597	-1.16177	0.381246	0.996384
COA-PWY: coenzyme A biosynthesis I|g__Lachnospiraceae_noname.s__Lachnospiraceae_bacterium_5_1_63FAA	1.00477	0.677945	0.867497	1.36163	-2.03111	0.38128	0.996384
PWY-6122: 5-aminoimidazole ribonucleotide biosynthesis II|g__Lachnospiraceae_noname.s__Lachnospiraceae_bacterium_3_1_46FAA	0.432085	0.57878	0.463897	0.597049	1.83628	0.382418	0.996384
PWY-6277: superpathway of 5-aminoimidazole ribonucleotide biosynthesis|g__Lachnospiraceae_noname.s__Lachnospiraceae_bacterium_3_1_46FAA	0.432085	0.57878	0.463897	0.597049	1.83628	0.382418	0.996384
NONMEVIPP-PWY: methylerythritol phosphate pathway I|g__Roseburia.s__Roseburia_intestinalis	1.10607	0.536282	2.50579	2.35529	-1.86604	0.383771	0.996384
PWY0-845: superpathway of pyridoxal 5'-phosphate biosynthesis and salvage|g__Bacteroides.s__Bacteroides_uniformis	30.7855	27.0438	39.8567	39.2674	1.35416	0.384578	0.996384
CENTFERM-PWY: pyruvate fermentation to butanoate|unclassified	11.8499	13.6027	12.3954	12.4573	-0.190582	0.384669	0.996384
PWY-7219: adenosine ribonucleotides de novo biosynthesis|g__Coprococcus.s__Coprococcus_comes	3.29418	2.49561	2.2241	2.17673	-0.648237	0.384753	0.996384
PWY-6124: inosine-5'-phosphate biosynthesis II|g__Alistipes.s__Alistipes_onderdonkii	5.75836	8.03208	8.21603	11.81	2.0018	0.385048	0.996384
PWY-561: superpathway of glyoxylate cycle and fatty acid degradation	1.66337	6.6768	1.22684	1.29102	1.41136	0.385818	0.996384
PWY-5030: L-histidine degradation III|g__Parabacteroides.s__Parabacteroides_merdae	2.73191	3.15061	5.28406	4.85517	0.0130946	0.386789	0.996384
PWY-5484: glycolysis II (from fructose 6-phosphate)|g__Parabacteroides.s__Parabacteroides_merdae	3.02641	3.32919	4.68044	4.36356	0.511375	0.386789	0.996384
NAD-BIOSYNTHESIS-II: NAD salvage pathway II	3.38505	7.09517	3.61166	4.07864	1.92292	0.387465	0.996384
GLUCONEO-PWY: gluconeogenesis I	127.685	129.325	120.287	122.113	0.0495775	0.387818	0.996384
PWY-6151: S-adenosyl-L-methionine cycle I|unclassified	75.4337	78.4762	73.8156	70.8114	0.672013	0.387818	0.996384
PWY4FS-7: phosphatidylglycerol biosynthesis I (plastidic)	29.3913	37.1485	28.459	25.9508	-1.0576	0.387818	0.996384
PWY4FS-8: phosphatidylglycerol biosynthesis II (non-plastidic)	29.3904	37.1468	28.4542	25.9446	-1.05755	0.387818	0.996384
SER-GLYSYN-PWY: superpathway of L-serine and glycine biosynthesis I	199.725	209.465	200.484	208.145	0.0143527	0.387818	0.996384
PWY-6549: L-glutamine biosynthesis III|unclassified	3.94076	4.44003	2.74183	4.28539	-1.48061	0.388851	0.996384
UNINTEGRATED|g__Dorea.s__Dorea_formicigenerans	1903.28	1982.51	1839.88	2334.34	-4.03977	0.388851	0.996384
TRPSYN-PWY: L-tryptophan biosynthesis|g__Bacteroides.s__Bacteroides_vulgatus	25.3067	27.1213	22.3085	23.5548	0.867623	0.389501	0.996384
ARGSYNBSUB-PWY: L-arginine biosynthesis II (acetyl cycle)|g__Coprococcus.s__Coprococcus_comes	1.9901	1.13361	1.31262	1.31087	-0.817991	0.391224	0.996384
SER-GLYSYN-PWY: superpathway of L-serine and glycine biosynthesis I|g__Parabacteroides.s__Parabacteroides_distasonis	6.29137	4.38717	3.61546	2.32611	0.605516	0.391684	0.996384
PWY-5677: succinate fermentation to butanoate|unclassified	1.84311	2.123	1.60255	2.0314	-1.33052	0.394158	0.996384
ARGSYNBSUB-PWY: L-arginine biosynthesis II (acetyl cycle)|g__Lachnospiraceae_noname.s__Lachnospiraceae_bacterium_7_1_58FAA	0.506175	0.51077	1.00022	0.946044	2.4588	0.394194	0.996384
PWY-7221: guanosine ribonucleotides de novo biosynthesis|g__Bacteroides.s__Bacteroides_dorei	8.48438	10.1052	7.95214	7.52515	0.0880663	0.394194	0.996384
TCA: TCA cycle I (prokaryotic)|unclassified	5.35191	6.27755	4.59109	4.78884	1.41944	0.394194	0.996384
P105-PWY: TCA cycle IV (2-oxoglutarate decarboxylase)	2.26644	8.75716	1.65769	1.91444	1.3314	0.396463	0.996384
PWY0-781: aspartate superpathway	50.1014	47.7951	46.4763	50.1366	0.821885	0.39793	0.996384
NONMEVIPP-PWY: methylerythritol phosphate pathway I|g__Collinsella.s__Collinsella_aerofaciens	2.48673	2.34562	2.75193	2.92887	-2.80045	0.398078	0.996384
COA-PWY: coenzyme A biosynthesis I|g__Eubacterium.s__Eubacterium_rectale	24.6091	12.8576	28.4035	19.1502	-0.904287	0.398659	0.996384
GLUTORN-PWY: L-ornithine biosynthesis|g__Bacteroides.s__Bacteroides_ovatus	8.4312	9.45952	10.3299	9.9059	-0.0620577	0.399517	0.996384
PWY-7111: pyruvate fermentation to isobutanol (engineered)|g__Bacteroides.s__Bacteroides_ovatus	7.00053	8.52289	9.66084	9.13016	0.918907	0.399769	0.996384
PWY-1042: glycolysis IV (plant cytosol)|g__Bacteroides.s__Bacteroides_vulgatus	56.7714	59.8731	51.8173	52.4504	-0.135988	0.399859	0.996384
ANAGLYCOLYSIS-PWY: glycolysis III (from glucose)|g__Roseburia.s__Roseburia_inulinivorans	1.97333	1.5953	1.06522	1.09235	-1.62282	0.400273	0.996384
GLYCOLYSIS: glycolysis I (from glucose 6-phosphate)|g__Parabacteroides.s__Parabacteroides_distasonis	8.93696	6.22958	4.98362	2.93877	-0.181108	0.402293	0.996384
PWY-7221: guanosine ribonucleotides de novo biosynthesis|g__Dorea.s__Dorea_longicatena	1.40668	1.12029	1.70542	1.13632	0.669423	0.403283	0.996384
PWY-5973: cis-vaccenate biosynthesis|g__Eubacterium.s__Eubacterium_rectale	32.141	16.9109	37.4497	26.2577	0.116179	0.403351	0.996384
ASPASN-PWY: superpathway of L-aspartate and L-asparagine biosynthesis|g__Coprococcus.s__Coprococcus_comes	1.51632	1.05994	1.06603	0.990022	-0.52887	0.405529	0.996384
PWY-7210: pyrimidine deoxyribonucleotides biosynthesis from CTP|unclassified	4.19111	6.16332	4.78078	4.13344	0.874628	0.406523	0.996384
PANTO-PWY: phosphopantothenate biosynthesis I|g__Bacteroides.s__Bacteroides_dorei	6.41181	8.17848	6.10085	6.88546	1.06765	0.407284	0.996384
GLYCOLYSIS: glycolysis I (from glucose 6-phosphate)|g__Parabacteroides.s__Parabacteroides_merdae	3.00317	3.28634	4.97144	4.77845	0.498557	0.407315	0.996384
PWY-6387: UDP-N-acetylmuramoyl-pentapeptide biosynthesis I (meso-diaminopimelate containing)|g__Parabacteroides.s__Parabacteroides_merdae	2.59677	2.7386	4.61914	4.53508	1.01125	0.407315	0.996384
ARGSYNBSUB-PWY: L-arginine biosynthesis II (acetyl cycle)|g__Bifidobacterium.s__Bifidobacterium_longum	2.26499	2.70031	6.54671	3.23093	0.387693	0.407662	0.996384
ASPASN-PWY: superpathway of L-aspartate and L-asparagine biosynthesis	174.559	182.939	144.304	152.347	-0.0371047	0.408196	0.996384
PANTOSYN-PWY: pantothenate and coenzyme A biosynthesis I|unclassified	30.186	33.4335	28.8088	30.0515	0.535579	0.408196	0.996384
PWY-6163: chorismate biosynthesis from 3-dehydroquinate	302.772	298.275	321.014	303.438	0.048565	0.408196	0.996384
PWY-6609: adenine and adenosine salvage III	240.872	237.429	228.29	239.686	-0.0703785	0.408196	0.996384
PWY-7221: guanosine ribonucleotides de novo biosynthesis|g__Roseburia.s__Roseburia_intestinalis	0.883887	0.394129	2.10787	1.97167	-2.01568	0.409036	0.996384
PWY66-400: glycolysis VI (metazoan)|g__Bacteroides.s__Bacteroides_caccae	4.71606	5.73512	4.80485	4.45493	0.209297	0.409036	0.996384
UNINTEGRATED|g__Alistipes.s__Alistipes_finegoldii	1294.76	1346.66	2228.87	2827.09	1.45618	0.409036	0.996384
PWY-621: sucrose degradation III (sucrose invertase)|g__Faecalibacterium.s__Faecalibacterium_prausnitzii	20.3105	20.4548	21.5247	19.613	-0.88104	0.409993	0.996384
RHAMCAT-PWY: L-rhamnose degradation I|g__Bacteroides.s__Bacteroides_vulgatus	37.5948	36.2632	32.6747	32.905	0.134878	0.409993	0.996384
VALSYN-PWY: L-valine biosynthesis|g__Bacteroides.s__Bacteroides_ovatus	8.25253	10.1299	11.0352	10.428	0.591474	0.410153	0.996384
PWY-6122: 5-aminoimidazole ribonucleotide biosynthesis II|g__Clostridium.s__Clostridium_leptum	0.93658	0.743923	1.99354	1.07036	-1.24615	0.410825	0.996384
PWY-6277: superpathway of 5-aminoimidazole ribonucleotide biosynthesis|g__Clostridium.s__Clostridium_leptum	0.93658	0.743923	1.99354	1.07036	-1.24615	0.410825	0.996384
PWY-7228: superpathway of guanosine nucleotides de novo biosynthesis I|g__Bacteroides.s__Bacteroides_caccae	4.43887	5.10786	4.08608	4.35755	-0.23672	0.412413	0.996384
PWY-6151: S-adenosyl-L-methionine cycle I|g__Bacteroides.s__Bacteroides_vulgatus	36.1262	36.6569	34.2253	33.1678	-0.0743456	0.414576	0.996384
PWY-5103: L-isoleucine biosynthesis III|g__Bacteroides.s__Bacteroides_thetaiotaomicron	3.03447	4.17314	3.70843	5.71675	0.226534	0.41848	0.996384
PWY-6737: starch degradation V|g__Anaerostipes.s__Anaerostipes_hadrus	0.830302	0.872257	1.619	1.21791	1.21072	0.418526	0.996384
ARO-PWY: chorismate biosynthesis I	284.956	279.628	297.12	281.922	0.0377131	0.418616	0.996384
P4-PWY: superpathway of L-lysine, L-threonine and L-methionine biosynthesis I	49.9033	51.2822	47.709	50.3648	0.365126	0.418616	0.996384
PWY-6630: superpathway of L-tyrosine biosynthesis|unclassified	16.5283	17.7041	17.751	16.8614	-0.310669	0.418616	0.996384
PWY-7357: thiamin formation from pyrithiamine and oxythiamine (yeast)	117.876	130.999	123.901	113.825	0.186329	0.418616	0.996384
PWY-7400: L-arginine biosynthesis IV (archaebacteria)|g__Blautia.s__Ruminococcus_torques	3.72152	3.43845	3.12077	3.26322	-0.600701	0.419481	0.996384
RHAMCAT-PWY: L-rhamnose degradation I|g__Bacteroides.s__Bacteroides_ovatus	9.54862	10.6627	11.1481	10.9286	0.625899	0.420634	0.996384
PWY-5695: urate biosynthesis/inosine 5'-phosphate degradation|g__Parabacteroides.s__Parabacteroides_distasonis	8.09111	5.81842	4.93291	3.01112	0.249243	0.424022	0.996384
PWY0-166: superpathway of pyrimidine deoxyribonucleotides de novo biosynthesis (E. coli)|unclassified	19.2196	21.4292	16.6457	19.486	-1.55476	0.425627	0.996384
PWY-6700: queuosine biosynthesis|g__Bacteroides.s__Bacteroides_stercoris	42.5235	45.7584	19.3361	25.4841	0.407982	0.42696	0.996384
PWY-1042: glycolysis IV (plant cytosol)|g__Dorea.s__Dorea_formicigenerans	0.994909	1.02468	1.06841	1.24026	-1.21747	0.428478	0.996384
PWY-7111: pyruvate fermentation to isobutanol (engineered)|g__Bacteroides.s__Bacteroides_thetaiotaomicron	3.13382	4.19484	3.80132	5.79154	0.552467	0.429135	0.996384
FERMENTATION-PWY: mixed acid fermentation	78.3794	70.3125	78.543	84.2775	-0.335525	0.429188	0.996384
MET-SAM-PWY: superpathway of S-adenosyl-L-methionine biosynthesis	106.498	109.59	102.876	107.31	0.545034	0.429188	0.996384
PWY-5667: CDP-diacylglycerol biosynthesis I	330.757	314.853	353.745	333.003	-0.00048657	0.429188	0.996384
PWY-6936: seleno-amino acid biosynthesis	92.0941	93.7997	79.5899	86.0651	0.445765	0.429188	0.996384
PWY-6151: S-adenosyl-L-methionine cycle I|g__Bacteroides.s__Bacteroides_dorei	8.84712	10.8026	7.47128	7.81594	-0.64934	0.429559	0.996384
PWY-7237: myo-, chiro- and scillo-inositol degradation|g__Lachnospiraceae_noname.s__Lachnospiraceae_bacterium_5_1_63FAA	3.12266	2.64256	3.64005	4.1689	0.546445	0.429681	0.996384
ARGSYN-PWY: L-arginine biosynthesis I (via L-ornithine)|g__Blautia.s__Ruminococcus_torques	3.71358	3.43358	3.09876	3.25633	-0.603207	0.430127	0.996384
SER-GLYSYN-PWY: superpathway of L-serine and glycine biosynthesis I|g__Dorea.s__Dorea_longicatena	1.68223	1.153	1.60035	1.33296	0.114283	0.430659	0.996384
PWY-7219: adenosine ribonucleotides de novo biosynthesis|g__Bacteroides.s__Bacteroides_vulgatus	38.4033	38.9558	34.2818	35.2149	0.195817	0.431212	0.996384
PWY-7219: adenosine ribonucleotides de novo biosynthesis|g__Eubacterium.s__Eubacterium_eligens	13.6275	9.44995	7.97624	7.89048	0.0957983	0.43218	0.996384
PWY-7111: pyruvate fermentation to isobutanol (engineered)|g__Parabacteroides.s__Parabacteroides_distasonis	7.70351	5.84976	4.609	3.07082	-0.18784	0.435139	0.996384
PWY-6125: superpathway of guanosine nucleotides de novo biosynthesis II|g__Bacteroides.s__Bacteroides_dorei	7.03123	9.76149	6.28933	6.89525	1.05684	0.437513	0.996384
PWY-5097: L-lysine biosynthesis VI|g__Parabacteroides.s__Parabacteroides_merdae	2.8477	2.94535	5.36685	4.61667	0.287897	0.438522	0.996384
ILEUSYN-PWY: L-isoleucine biosynthesis I (from threonine)|g__Lachnospiraceae_noname.s__Lachnospiraceae_bacterium_7_1_58FAA	0.949596	0.880516	1.46884	1.30966	1.8797	0.439294	0.996384
PWY-6386: UDP-N-acetylmuramoyl-pentapeptide biosynthesis II (lysine-containing)|g__Parabacteroides.s__Parabacteroides_merdae	2.6869	2.83355	4.71862	4.62454	1.01502	0.439294	0.996384
ILEUSYN-PWY: L-isoleucine biosynthesis I (from threonine)|g__Flavonifractor.s__Flavonifractor_plautii	0.591293	0.682513	0.536285	0.854903	0.148474	0.439671	0.996384
PWY-6126: superpathway of adenosine nucleotides de novo biosynthesis II|g__Flavonifractor.s__Flavonifractor_plautii	0.477138	0.375886	0.370491	0.646773	-1.32918	0.439671	0.996384
PWY-6703: preQ0 biosynthesis|g__Bacteroides.s__Bacteroides_caccae	3.49336	4.21155	3.38285	3.17845	0.212188	0.439758	0.996384
FASYN-ELONG-PWY: fatty acid elongation -- saturated	99.2692	114.722	105.367	105.112	0.203873	0.439911	0.996384
PWY-5030: L-histidine degradation III	174.862	177.967	165.527	167.135	0.0980254	0.439911	0.996384
PWY-5484: glycolysis II (from fructose 6-phosphate)	404.846	415.032	386.901	388.966	0.0423844	0.439911	0.996384
PWY0-1319: CDP-diacylglycerol biosynthesis II	331.088	315.243	354.816	334.393	-0.00142785	0.439911	0.996384
THISYNARA-PWY: superpathway of thiamin diphosphate biosynthesis III (eukaryotes)	104.058	108.053	115.697	107.099	0.0858749	0.439911	0.996384
THISYNARA-PWY: superpathway of thiamin diphosphate biosynthesis III (eukaryotes)|unclassified	18.3841	18.6461	16.5302	17.9609	-1.1472	0.439911	0.996384
UNINTEGRATED|g__Blautia.s__Ruminococcus_torques	4958.53	4532.96	4123.43	4491.86	0.342272	0.439911	0.996384
PWY-7111: pyruvate fermentation to isobutanol (engineered)|g__Anaerostipes.s__Anaerostipes_hadrus	0.837052	0.782724	1.17938	0.836858	0.379739	0.44076	0.996384
CALVIN-PWY: Calvin-Benson-Bassham cycle|g__Eubacterium.s__Eubacterium_rectale	32.4584	18.0621	38.2712	25.2496	-0.0622978	0.441555	0.996384
PWY-5667: CDP-diacylglycerol biosynthesis I|g__Blautia.s__Ruminococcus_torques	3.87393	3.13711	2.28822	3.11896	-1.04809	0.44176	0.996384
PWY0-1319: CDP-diacylglycerol biosynthesis II|g__Blautia.s__Ruminococcus_torques	3.87393	3.13711	2.28822	3.11896	-1.04809	0.44176	0.996384
NAGLIPASYN-PWY: lipid IVA biosynthesis	7.7049	11.8694	5.45871	4.43078	0.346042	0.441906	0.996384
PWY0-1296: purine ribonucleosides degradation|g__Faecalibacterium.s__Faecalibacterium_prausnitzii	27.7859	31.0736	27.7694	28.1495	-1.24051	0.442062	0.996384
UDPNAGSYN-PWY: UDP-N-acetyl-D-glucosamine biosynthesis I|unclassified	8.84282	7.66782	10.4507	11.2031	-1.04355	0.442091	0.996384
PWY-6126: superpathway of adenosine nucleotides de novo biosynthesis II|g__Bacteroides.s__Bacteroides_thetaiotaomicron	2.99855	4.03932	3.52843	6.00977	0.996319	0.445005	0.996384
PANTO-PWY: phosphopantothenate biosynthesis I|g__Dorea.s__Dorea_longicatena	2.03011	0.983338	1.74844	1.29513	-1.33051	0.445356	0.996384
FASYN-INITIAL-PWY: superpathway of fatty acid biosynthesis initiation (E. coli)|g__Bacteroides.s__Bacteroides_caccae	4.41439	5.34039	4.47113	4.04731	1.35266	0.446369	0.996384
PWY-6309: L-tryptophan degradation XI (mammalian, via kynurenine)|g__Collinsella.s__Collinsella_aerofaciens	5.4837	4.10296	5.87449	5.9739	-2.20016	0.446738	0.996384
PWY0-845: superpathway of pyridoxal 5'-phosphate biosynthesis and salvage|g__Bacteroides.s__Bacteroides_ovatus	8.1415	9.91786	10.6945	10.8376	-0.0979497	0.447214	0.996384
PWY66-422: D-galactose degradation V (Leloir pathway)|g__Lachnospiraceae_noname.s__Lachnospiraceae_bacterium_5_1_63FAA	1.28535	1.22381	1.19631	1.28454	0.594305	0.447565	0.996384
PWY66-400: glycolysis VI (metazoan)|g__Parabacteroides.s__Parabacteroides_merdae	3.45237	3.66515	5.27485	4.85963	0.481359	0.450266	0.996384
COMPLETE-ARO-PWY: superpathway of aromatic amino acid biosynthesis	286.685	281.359	299.582	283.364	0.0428342	0.450784	0.996384
PWY-5101: L-isoleucine biosynthesis II|unclassified	7.5105	7.94434	8.11585	7.47916	-0.276368	0.450784	0.996384
PWY-5659: GDP-mannose biosynthesis|unclassified	20.9692	23.5054	21.0098	20.2463	1.11184	0.450784	0.996384
PWY-5695: urate biosynthesis/inosine 5'-phosphate degradation|unclassified	47.8989	47.6969	42.1635	37.1921	0.122466	0.450784	0.996384
PWY-6125: superpathway of guanosine nucleotides de novo biosynthesis II	223.993	233.364	213.183	209.458	0.0740697	0.450784	0.996384
PWY-6630: superpathway of L-tyrosine biosynthesis	40.3016	43.3397	38.4913	39.3962	0.107685	0.450784	0.996384
PWY-6147: 6-hydroxymethyl-dihydropterin diphosphate biosynthesis I|g__Bacteroides.s__Bacteroides_vulgatus	30.1155	32.4816	25.7575	25.9169	0.0328969	0.450911	0.996384
PWY-5030: L-histidine degradation III|g__Bacteroides.s__Bacteroides_ovatus	7.60078	7.73372	9.7695	9.4078	-0.211985	0.451884	0.996384
NONMEVIPP-PWY: methylerythritol phosphate pathway I|g__Bacteroides.s__Bacteroides_ovatus	5.67568	7.74455	9.53638	9.51381	0.479142	0.452233	0.996384
PWY-5676: acetyl-CoA fermentation to butanoate II|unclassified	15.2081	14.397	15.6203	15.3389	-0.0712552	0.452852	0.996384
OANTIGEN-PWY: O-antigen building blocks biosynthesis (E. coli)|unclassified	13.9863	12.2121	15.022	16.3333	-1.07804	0.453035	0.996384
PWY-7187: pyrimidine deoxyribonucleotides de novo biosynthesis II|unclassified	25.7272	28.083	22.3619	26.5101	-0.675262	0.453035	0.996384
COA-PWY-1: coenzyme A biosynthesis II (mammalian)|g__Lachnospiraceae_noname.s__Lachnospiraceae_bacterium_5_1_63FAA	1.00265	0.658885	0.873415	1.3033	-2.3661	0.454657	0.996384
PWY0-1479: tRNA processing	7.72786	6.7664	5.85199	6.46933	0.889775	0.456984	0.996384
TRPSYN-PWY: L-tryptophan biosynthesis|g__Eubacterium.s__Eubacterium_eligens	6.91268	4.92036	4.09045	4.37655	-1.82347	0.457537	0.996384
PWY-7007: methyl ketone biosynthesis|unclassified	4.06012	3.69146	3.91196	4.35609	-1.4349	0.458564	0.996384
PWY-6892: thiazole biosynthesis I (E. coli)	2.44767	10.0159	1.64707	1.81136	1.58171	0.460253	0.996384
THISYN-PWY: superpathway of thiamin diphosphate biosynthesis I	6.91223	22.3925	7.17727	7.50684	1.67729	0.460253	0.996384
PWY-7198: pyrimidine deoxyribonucleotides de novo biosynthesis IV|unclassified	3.59145	5.51782	4.12394	3.5361	0.88413	0.460635	0.996384
COMPLETE-ARO-PWY: superpathway of aromatic amino acid biosynthesis|g__Blautia.s__Ruminococcus_obeum	1.18441	0.522162	1.25077	2.03573	-1.00712	0.46077	0.996384
PWY-5100: pyruvate fermentation to acetate and lactate II|unclassified	31.5711	35.6487	35.9612	38.1121	0.607062	0.461804	0.996384
PWY-6628: superpathway of L-phenylalanine biosynthesis	44.7524	50.1186	43.2763	45.0844	0.0751773	0.461804	0.996384
PWY0-1586: peptidoglycan maturation (meso-diaminopimelate containing)	154.264	142.177	156.649	146.572	-0.0877721	0.461804	0.996384
GLUTORN-PWY: L-ornithine biosynthesis|g__Blautia.s__Ruminococcus_torques	2.66934	2.51886	2.01908	2.27293	-0.350216	0.462992	0.996384
NONOXIPENT-PWY: pentose phosphate pathway (non-oxidative branch)|g__Eubacterium.s__Eubacterium_hallii	1.04037	1.44146	2.68096	3.09048	1.19781	0.463655	0.996384
PWY-7221: guanosine ribonucleotides de novo biosynthesis|g__Bacteroides.s__Bacteroides_vulgatus	36.8093	40.3478	32.907	34.01	0.319515	0.464101	0.996384
GLYCOLYSIS-E-D: superpathway of glycolysis and Entner-Doudoroff	33.5449	36.3118	27.1735	26.5613	-0.506061	0.46413	0.996384
PWY-7400: L-arginine biosynthesis IV (archaebacteria)|g__Dorea.s__Dorea_longicatena	1.63371	0.842513	1.50883	1.31947	-2.01732	0.464307	0.996384
PWY-6151: S-adenosyl-L-methionine cycle I|g__Blautia.s__Ruminococcus_torques	2.33453	2.46272	2.25495	1.94317	0.783673	0.468151	0.996384
PWY-1042: glycolysis IV (plant cytosol)|g__Parabacteroides.s__Parabacteroides_distasonis	14.2733	10.2837	8.5636	5.40195	-0.29834	0.469481	0.996384
PWY-1042: glycolysis IV (plant cytosol)|g__Parabacteroides.s__Parabacteroides_merdae	6.94967	7.56886	11.6385	11.0992	0.301849	0.472669	0.996384
1CMET2-PWY: N10-formyl-tetrahydrofolate biosynthesis|unclassified	45.539	50.3099	42.6278	40.6421	0.693556	0.47297	0.996384
COLANSYN-PWY: colanic acid building blocks biosynthesis	32.0169	37.4424	32.4823	33.9818	0.6571	0.47297	0.996384
GLUTORN-PWY: L-ornithine biosynthesis	201.152	211.749	215.276	219.619	0.0355997	0.47297	0.996384
GLYCOLYSIS: glycolysis I (from glucose 6-phosphate)	453.281	460.138	435.6	434.684	0.0351046	0.47297	0.996384
METSYN-PWY: L-homoserine and L-methionine biosynthesis	106.86	108.584	104.43	105.756	0.571709	0.47297	0.996384
P163-PWY: L-lysine fermentation to acetate and butanoate	27.0893	26.9565	24.5834	24.1164	0.390818	0.47297	0.996384
PWY-2942: L-lysine biosynthesis III	365.108	362.209	368.97	357.229	0.0374568	0.47297	0.996384
PWY-4984: urea cycle	36.683	35.4101	35.5977	30.2662	0.835373	0.47297	0.996384
PWY-621: sucrose degradation III (sucrose invertase)	79.1785	73.1725	82.7154	76.587	-0.0947088	0.47297	0.996384
UNINTEGRATED|g__Roseburia.s__Roseburia_intestinalis	4625.45	3444.03	6107.39	5936.52	-0.387732	0.473299	0.996384
PWY66-400: glycolysis VI (metazoan)|g__Alistipes.s__Alistipes_shahii	2.19449	2.80062	3.26925	3.13572	0.581316	0.473948	0.996384
ARGSYNBSUB-PWY: L-arginine biosynthesis II (acetyl cycle)|g__Blautia.s__Ruminococcus_torques	3.58637	3.39405	2.8377	3.10827	-0.60807	0.47425	0.996384
PWY-3841: folate transformations II|g__Eubacterium.s__Eubacterium_rectale	26.566	14.2621	30.6641	21.7494	0.408286	0.47425	0.996384
ARGSYN-PWY: L-arginine biosynthesis I (via L-ornithine)|g__Dorea.s__Dorea_longicatena	1.63112	0.840667	1.49947	1.31519	-2.01937	0.475839	0.996384
PANTO-PWY: phosphopantothenate biosynthesis I|g__Parabacteroides.s__Parabacteroides_distasonis	6.93178	4.96788	3.94362	2.62705	-0.588299	0.478672	0.996384
P163-PWY: L-lysine fermentation to acetate and butanoate|unclassified	4.85895	4.64255	4.38124	4.56064	0.344004	0.479786	0.996384
COA-PWY-1: coenzyme A biosynthesis II (mammalian)|g__Bifidobacterium.s__Bifidobacterium_longum	2.56727	2.90953	8.1871	4.12285	-1.76356	0.481796	0.996384
PWY-7228: superpathway of guanosine nucleotides de novo biosynthesis I|g__Bacteroides.s__Bacteroides_thetaiotaomicron	3.33355	4.36962	4.74778	6.85797	1.47695	0.482493	0.996384
PWY-5103: L-isoleucine biosynthesis III	355.597	369.338	358.06	350.419	0.0995917	0.484281	0.996384
PWY-5347: superpathway of L-methionine biosynthesis (transsulfuration)	112.182	113.944	110.834	111.185	0.583241	0.484281	0.996384
PWY-6168: flavin biosynthesis III (fungi)|unclassified	39.9533	41.9863	36.6116	36.6801	0.637002	0.484281	0.996384
PWY-724: superpathway of L-lysine, L-threonine and L-methionine biosynthesis II	217.482	222.958	235.09	234.274	0.0597509	0.484281	0.996384
PWY-7323: superpathway of GDP-mannose-derived O-antigen building blocks biosynthesis	31.3655	38.6959	31.5404	32.8553	1.13542	0.484281	0.996384
PWY-5686: UMP biosynthesis|g__Collinsella.s__Collinsella_aerofaciens	4.59897	3.99045	5.09049	5.51907	-1.7764	0.484718	0.996384
PWY66-400: glycolysis VI (metazoan)|g__Bacteroides.s__Bacteroides_vulgatus	34.7484	36.2987	30.1965	31.2282	-0.0417667	0.485657	0.996384
ANAGLYCOLYSIS-PWY: glycolysis III (from glucose)|g__Alistipes.s__Alistipes_shahii	2.18591	2.76358	3.17369	3.11731	0.539816	0.485662	0.996384
NONMEVIPP-PWY: methylerythritol phosphate pathway I|g__Eubacterium.s__Eubacterium_hallii	0.604185	1.19135	1.54459	2.08487	0.485018	0.485662	0.996384
PWY-7111: pyruvate fermentation to isobutanol (engineered)|g__Bacteroides.s__Bacteroides_vulgatus	33.649	34.9819	29.8983	31.5705	-0.520051	0.486451	0.996384
VALSYN-PWY: L-valine biosynthesis|g__Bacteroides.s__Bacteroides_vulgatus	33.649	34.9819	29.8983	31.5705	-0.520051	0.486451	0.996384
PWY-7208: superpathway of pyrimidine nucleobases salvage|g__Adlercreutzia.s__Adlercreutzia_equolifaciens	0.421335	0.541407	0.499636	0.407548	2.17758	0.487372	0.996384
UNINTEGRATED|g__Lachnospiraceae_noname.s__Lachnospiraceae_bacterium_3_1_57FAA_CT1	703.593	496.417	714.442	1326.65	-3.37579	0.487372	0.996384
PWY-6703: preQ0 biosynthesis|g__Parabacteroides.s__Parabacteroides_distasonis	6.97212	5.41106	4.19152	2.46597	-0.54949	0.490639	0.996384
PWY-3841: folate transformations II|g__Parabacteroides.s__Parabacteroides_distasonis	7.70482	5.16498	4.66501	2.78888	0.143696	0.493183	0.996384
PWY-6121: 5-aminoimidazole ribonucleotide biosynthesis I|g__Lachnospiraceae_noname.s__Lachnospiraceae_bacterium_5_1_63FAA	1.38504	1.10415	0.989132	1.48751	-0.170535	0.494944	0.996384
COBALSYN-PWY: adenosylcobalamin salvage from cobinamide I|unclassified	13.0155	15.0322	16.7178	16.5156	0.196679	0.495734	0.996384
LACTOSECAT-PWY: lactose and galactose degradation I|unclassified	13.9513	13.5591	15.0056	14.1299	0.667673	0.495734	0.996384
PWY-1042: glycolysis IV (plant cytosol)	657.651	660.422	645.78	633.106	0.0345376	0.495734	0.996384
PWY-4981: L-proline biosynthesis II (from arginine)|unclassified	23.3905	23.5408	20.2889	20.6265	1.13535	0.495734	0.996384
PWY-6608: guanosine nucleotides degradation III	48.2399	51.9793	44.0775	35.3488	0.843521	0.495734	0.996384
PWY-6629: superpathway of L-tryptophan biosynthesis|unclassified	23.9875	27.9637	28.328	27.9148	0.166858	0.495734	0.996384
PWYG-321: mycolate biosynthesis|unclassified	30.0408	30.4245	27.1483	25.6307	0.647177	0.495734	0.996384
PWY-7219: adenosine ribonucleotides de novo biosynthesis|g__Bacteroides.s__Bacteroides_stercoris	43.7245	46.2571	21.5112	26.9618	0.539065	0.496285	0.996384
PWY-7539: 6-hydroxymethyl-dihydropterin diphosphate biosynthesis III (Chlamydia)|g__Bacteroides.s__Bacteroides_vulgatus	27.3716	29.0021	24.2029	24.4162	0.038476	0.496285	0.996384
SER-GLYSYN-PWY: superpathway of L-serine and glycine biosynthesis I|g__Eubacterium.s__Eubacterium_rectale	21.0119	11.5084	24.6747	13.3906	-0.928997	0.497211	0.996384
PWY-5686: UMP biosynthesis|g__Alistipes.s__Alistipes_putredinis	10.0187	9.98555	8.2367	8.04464	0.116837	0.497832	0.996384
PWY-6876: isopropanol biosynthesis|unclassified	4.01155	4.56638	3.77559	4.33007	2.13408	0.498223	0.996384
PWY0-162: superpathway of pyrimidine ribonucleotides de novo biosynthesis|unclassified	25.8912	30.1997	23.4123	21.16	0.605873	0.498278	0.996384
PWY-7219: adenosine ribonucleotides de novo biosynthesis|g__Anaerostipes.s__Anaerostipes_hadrus	0.910597	0.910726	1.24837	1.499	1.2329	0.499208	0.996384
SER-GLYSYN-PWY: superpathway of L-serine and glycine biosynthesis I|g__Faecalibacterium.s__Faecalibacterium_prausnitzii	3.27201	4.5808	1.22246	1.35596	1.30568	0.499208	0.996384
PWY-7219: adenosine ribonucleotides de novo biosynthesis|g__Roseburia.s__Roseburia_inulinivorans	2.25778	1.81032	1.50058	1.72185	-1.70875	0.499945	0.996384
PWY-6703: preQ0 biosynthesis|g__Eubacterium.s__Eubacterium_hallii	0.957129	1.12544	1.55375	2.3427	-2.23791	0.502459	0.996384
PWY-5030: L-histidine degradation III|g__Parabacteroides.s__Parabacteroides_distasonis	7.37423	4.96197	4.248	2.4488	0.0401804	0.505271	0.996384
PWY-6737: starch degradation V|g__Coprococcus.s__Coprococcus_comes	1.97888	1.40271	1.25485	1.13972	-0.0397285	0.506971	0.996384
ARGORNPROST-PWY: arginine, ornithine and proline interconversion	23.2862	20.1083	23.8915	23.675	-1.07955	0.507328	0.996384
BRANCHED-CHAIN-AA-SYN-PWY: superpathway of branched amino acid biosynthesis	373.008	383.123	373.859	366.77	0.0753734	0.507328	0.996384
PWY-2941: L-lysine biosynthesis II	45.926	41.6743	51.3168	53.8145	-1.35282	0.507328	0.996384
PWY-5989: stearate biosynthesis II (bacteria and plants)	97.0609	95.7114	105.017	94.0402	0.129594	0.507328	0.996384
PWY-6126: superpathway of adenosine nucleotides de novo biosynthesis II	308.607	307.624	299.749	289.994	0.0413254	0.507328	0.996384
PWY-6305: putrescine biosynthesis IV|unclassified	13.8592	14.9073	17.4872	16.4159	0.124496	0.507328	0.996384
PWY0-1296: purine ribonucleosides degradation	228.769	211.639	223.516	212.334	-0.0472043	0.507328	0.996384
PWY-1042: glycolysis IV (plant cytosol)|g__Eubacterium.s__Eubacterium_siraeum	7.57068	6.25194	6.94806	3.52946	-1.11818	0.509292	0.996384
PWY-7219: adenosine ribonucleotides de novo biosynthesis|g__Eubacterium.s__Eubacterium_hallii	1.71438	2.4754	2.85315	3.28955	-0.417383	0.509816	0.996384
UNINTEGRATED|g__Blautia.s__Ruminococcus_obeum	3950.65	3415.71	4783.51	5256.78	-0.0738187	0.509961	0.996384
UNINTEGRATED|g__Bacteroides.s__Bacteroides_vulgatus	41535.5	42755.8	36615.1	38436.4	-0.866882	0.509988	0.996384
PWY-6126: superpathway of adenosine nucleotides de novo biosynthesis II|g__Bacteroides.s__Bacteroides_dorei	7.42053	9.88596	7.26944	8.02793	0.272058	0.512315	0.996384
PWY-4984: urea cycle|unclassified	5.83127	7.81479	5.79608	4.61681	0.594736	0.515137	0.996384
PWY-6749: CMP-legionaminate biosynthesis I|unclassified	2.68917	3.72417	3.09711	3.01	-0.0679556	0.515137	0.996384
PWY-7111: pyruvate fermentation to isobutanol (engineered)|g__Blautia.s__Ruminococcus_obeum	2.20813	2.15513	3.29376	3.47779	-0.392918	0.515577	0.996384
VALSYN-PWY: L-valine biosynthesis|g__Blautia.s__Ruminococcus_obeum	2.20813	2.15513	3.29376	3.47779	-0.392918	0.515577	0.996384
PWY-6527: stachyose degradation|g__Faecalibacterium.s__Faecalibacterium_prausnitzii	10.2108	12.74	7.7281	7.49746	0.945993	0.515663	0.996384
PWY-7456: mannan degradation|g__Parabacteroides.s__Parabacteroides_distasonis	6.48345	4.75481	3.78427	2.31717	0.242734	0.517512	0.996384
HOMOSER-METSYN-PWY: L-methionine biosynthesis I	68.005	68.9959	65.2071	65.8975	0.532947	0.51906	0.996384
PWY-7208: superpathway of pyrimidine nucleobases salvage|unclassified	27.008	29.5966	31.2573	26.8867	0.343907	0.51906	0.996384
PWY0-862: (5Z)-dodec-5-enoate biosynthesis|unclassified	27.3102	27.6418	24.5289	23.4978	0.64217	0.51906	0.996384
PWY66-422: D-galactose degradation V (Leloir pathway)|unclassified	47.2094	51.3157	44.2111	43.9804	1.12997	0.51906	0.996384
PWY-5686: UMP biosynthesis|g__Roseburia.s__Roseburia_inulinivorans	1.48195	1.0956	1.03321	0.763104	-1.07194	0.519731	0.996384
UNINTEGRATED|g__Anaerostipes.s__Anaerostipes_hadrus	732.4	595.691	1003.21	873.453	2.40984	0.519731	0.996384
ASPASN-PWY: superpathway of L-aspartate and L-asparagine biosynthesis|g__Bacteroides.s__Bacteroides_thetaiotaomicron	4.01715	5.28139	4.56825	7.74183	0.816731	0.519854	0.996384
GLYCOLYSIS: glycolysis I (from glucose 6-phosphate)|g__Bacteroides.s__Bacteroides_vulgatus	31.3744	32.6394	27.5364	28.6358	-0.0371005	0.520751	0.996384
PWY-1042: glycolysis IV (plant cytosol)|g__Collinsella.s__Collinsella_aerofaciens	6.08794	5.27317	7.15833	6.97543	-0.918625	0.520751	0.996384
P162-PWY: L-glutamate degradation V (via hydroxyglutarate)|unclassified	6.53834	7.02959	6.11896	5.77702	-0.236494	0.521643	0.996384
PWY-7111: pyruvate fermentation to isobutanol (engineered)|g__Roseburia.s__Roseburia_hominis	1.0713	1.74877	0.461789	0.534833	-1.13613	0.521679	0.996384
PWY-621: sucrose degradation III (sucrose invertase)|g__Eubacterium.s__Eubacterium_rectale	12.6233	6.12544	15.6089	10.6333	-1.21655	0.521722	0.996384
PWY-6151: S-adenosyl-L-methionine cycle I|g__Eubacterium.s__Eubacterium_hallii	0.778061	0.902689	1.7286	1.90877	-0.0140023	0.524799	0.996384
PWY66-422: D-galactose degradation V (Leloir pathway)|g__Anaerostipes.s__Anaerostipes_hadrus	0.897368	0.80573	1.38745	1.36755	0.695536	0.527484	0.996384
PWY-6151: S-adenosyl-L-methionine cycle I|g__Bacteroides.s__Bacteroides_stercoris	41.6396	44.4716	19.0463	24.3122	0.0708787	0.527731	0.996384
PWY-1042: glycolysis IV (plant cytosol)|g__Alistipes.s__Alistipes_onderdonkii	7.0409	11.0966	11.6829	15.5698	1.5028	0.530573	0.996384
P124-PWY: Bifidobacterium shunt	51.1328	51.8653	46.571	57.6216	0.912698	0.530928	0.996384
PWY-7664: oleate biosynthesis IV (anaerobic)|unclassified	28.2804	28.777	25.5408	24.4254	0.644382	0.530928	0.996384
PWY-6737: starch degradation V|g__Dorea.s__Dorea_longicatena	1.86249	0.753929	1.45281	1.0915	-1.33625	0.531199	0.996384
PWY-5100: pyruvate fermentation to acetate and lactate II|g__Lachnospiraceae_noname.s__Lachnospiraceae_bacterium_5_1_63FAA	1.61378	1.15824	1.25217	1.82947	-1.283	0.531266	0.996384
PWY-7208: superpathway of pyrimidine nucleobases salvage|g__Collinsella.s__Collinsella_aerofaciens	3.81129	3.80583	4.87966	4.3185	0.232215	0.531851	0.996384
PWY-5097: L-lysine biosynthesis VI|g__Bacteroides.s__Bacteroides_vulgatus	26.6688	28.463	24.5881	26.047	0.41179	0.533609	0.996384
PWY-7219: adenosine ribonucleotides de novo biosynthesis|g__Flavonifractor.s__Flavonifractor_plautii	0.783818	0.686057	0.691564	0.994467	-1.62819	0.537437	0.996384
UNINTEGRATED|g__Alistipes.s__Alistipes_onderdonkii	6278.48	8617.32	9776.59	13741	-0.789006	0.538383	0.996384
PEPTIDOGLYCANSYN-PWY: peptidoglycan biosynthesis I (meso-diaminopimelate containing)|g__Bacteroides.s__Bacteroides_ovatus	7.65544	8.61463	10.8312	11.0334	0.550753	0.539088	0.996384
PWY-7234: inosine-5'-phosphate biosynthesis III|g__Alistipes.s__Alistipes_onderdonkii	5.08964	7.32863	7.40507	11.1215	1.4286	0.539942	0.996384
P122-PWY: heterolactic fermentation|unclassified	1.87446	3.22272	2.32819	2.69449	0.853639	0.540072	0.996384
PWY-5667: CDP-diacylglycerol biosynthesis I|g__Roseburia.s__Roseburia_inulinivorans	1.47958	1.7097	0.815061	0.740784	0.683897	0.540255	0.996384
PWY0-1319: CDP-diacylglycerol biosynthesis II|g__Roseburia.s__Roseburia_inulinivorans	1.47958	1.7097	0.815061	0.740784	0.683897	0.540255	0.996384
UNINTEGRATED|g__Flavonifractor.s__Flavonifractor_plautii	947.78	876.074	748.324	1229.26	-2.43364	0.542448	0.996384
ANAEROFRUCAT-PWY: homolactic fermentation	341.497	339.326	345.591	338.337	0.0245359	0.54293	0.996384
P221-PWY: octane oxidation	16.675	17.0711	14.3388	18.3828	-1.6096	0.54293	0.996384
PWY-3001: superpathway of L-isoleucine biosynthesis I	204.39	214.693	215.685	219.867	0.0690473	0.54293	0.996384
PWY-7228: superpathway of guanosine nucleotides de novo biosynthesis I	238.135	250.322	227.847	225.304	0.0741752	0.54293	0.996384
PWY-5100: pyruvate fermentation to acetate and lactate II|g__Dorea.s__Dorea_formicigenerans	0.899118	0.790926	0.86019	0.941624	-0.782502	0.544463	0.996384
GLUTORN-PWY: L-ornithine biosynthesis|g__Alistipes.s__Alistipes_onderdonkii	4.53026	6.38058	6.97266	9.99167	-0.766814	0.5461	0.996384
PWY-7184: pyrimidine deoxyribonucleotides de novo biosynthesis I|g__Bacteroides.s__Bacteroides_thetaiotaomicron	2.66471	3.52046	3.85756	6.01716	-0.536014	0.5461	0.996384
PWY-7221: guanosine ribonucleotides de novo biosynthesis|g__Bacteroides.s__Bacteroides_stercoris	43.5141	44.535	18.4646	24.9846	-0.0716498	0.5461	0.996384
PWY0-166: superpathway of pyrimidine deoxyribonucleotides de novo biosynthesis (E. coli)|g__Bacteroides.s__Bacteroides_thetaiotaomicron	2.74863	3.66999	4.10317	6.34966	-0.547952	0.5461	0.996384
PWY-2942: L-lysine biosynthesis III|g__Blautia.s__Ruminococcus_obeum	1.39649	1.09854	2.03855	2.47356	0.358547	0.548073	0.996384
PWY66-409: superpathway of purine nucleotide salvage|unclassified	6.86225	5.63306	4.80282	6.33822	-2.12785	0.54822	0.996384
PWY-7221: guanosine ribonucleotides de novo biosynthesis|g__Dorea.s__Dorea_formicigenerans	0.409146	0.582558	0.622693	0.566839	-0.524952	0.549747	0.996384
PWY-5173: superpathway of acetyl-CoA biosynthesis	4.12192	6.79113	4.88558	5.81323	-0.0595405	0.551687	0.996384
PWY-6163: chorismate biosynthesis from 3-dehydroquinate|g__Blautia.s__Ruminococcus_torques	2.44461	2.76162	2.18828	1.87987	0.489847	0.552293	0.996384
PWY-7237: myo-, chiro- and scillo-inositol degradation|g__Dorea.s__Dorea_longicatena	2.39076	1.82457	1.77433	1.39919	-0.217453	0.552293	0.996384
PWY-3781: aerobic respiration I (cytochrome c)|unclassified	3.08883	2.60721	1.97867	2.09374	-1.53901	0.553338	0.996384
PHOSLIPSYN-PWY: superpathway of phospholipid biosynthesis I (bacteria)	46.5347	51.2528	45.8858	41.5416	-1.23391	0.555063	0.996384
PWY-7234: inosine-5'-phosphate biosynthesis III	79.8302	84.2815	86.619	95.6368	0.479439	0.555063	0.996384
RIBOSYN2-PWY: flavin biosynthesis I (bacteria and plants)|unclassified	25.8137	25.9417	21.971	22.2251	0.148282	0.555063	0.996384
PWY-6168: flavin biosynthesis III (fungi)|g__Parabacteroides.s__Parabacteroides_distasonis	8.22427	5.56132	4.71278	2.80643	0.905327	0.555137	0.996384
HISTSYN-PWY: L-histidine biosynthesis|g__Parabacteroides.s__Parabacteroides_merdae	3.16852	3.08796	5.48396	4.99582	0.211833	0.555696	0.996384
UNINTEGRATED|g__Parabacteroides.s__Parabacteroides_merdae	9816.52	9489.72	12552.2	11299	0.972872	0.555696	0.996384
PWY-7111: pyruvate fermentation to isobutanol (engineered)|g__Coprococcus.s__Coprococcus_comes	2.34863	1.74404	1.72761	1.84551	-1.0409	0.556	0.996384
NONMEVIPP-PWY: methylerythritol phosphate pathway I|g__Eubacterium.s__Eubacterium_rectale	30.2609	15.841	36.2574	23.6286	0.299014	0.556259	0.996384
UNINTEGRATED|g__Lachnospiraceae_noname.s__Lachnospiraceae_bacterium_3_1_46FAA	589.277	686.283	595.695	731.129	4.35166	0.557232	0.996384
PWY-6595: superpathway of guanosine nucleotides degradation (plants)	6.49693	6.52981	7.99396	7.32684	-0.995673	0.557648	0.996384
PWY-5686: UMP biosynthesis|g__Blautia.s__Ruminococcus_torques	3.63388	3.09929	2.85597	2.55704	-1.21572	0.557824	0.996384
FAO-PWY: fatty acid &beta;-oxidation I|unclassified	4.58753	5.13733	4.51674	4.33178	-1.50223	0.557951	0.996384
PWY-6309: L-tryptophan degradation XI (mammalian, via kynurenine)	5.99544	4.61671	6.08391	6.28447	-1.29219	0.558035	0.996384
HISTSYN-PWY: L-histidine biosynthesis|g__Ruminococcus.s__Ruminococcus_bromii	2.53204	3.80878	3.27823	4.35304	-0.361762	0.560365	0.996384
GLYCOLYSIS-TCA-GLYOX-BYPASS: superpathway of glycolysis, pyruvate dehydrogenase, TCA, and glyoxylate bypass	3.17107	9.24241	2.08786	1.95805	0.997013	0.560791	0.996384
PYRIDOXSYN-PWY: pyridoxal 5'-phosphate biosynthesis I|g__Bacteroides.s__Bacteroides_caccae	3.75949	4.67479	3.76179	3.28208	-0.842002	0.560791	0.996384
TCA-GLYOX-BYPASS: superpathway of glyoxylate bypass and TCA	1.89741	7.04672	1.14039	1.36048	1.00962	0.560791	0.996384
PWY-6737: starch degradation V|g__Lachnospiraceae_noname.s__Lachnospiraceae_bacterium_5_1_63FAA	1.80695	1.7138	1.66796	2.27985	0.0892959	0.562907	0.996384
PWY-3001: superpathway of L-isoleucine biosynthesis I|g__Alistipes.s__Alistipes_onderdonkii	4.65867	7.1634	7.52585	10.8564	1.20257	0.563613	0.996384
PWY-6122: 5-aminoimidazole ribonucleotide biosynthesis II|g__Lachnospiraceae_noname.s__Lachnospiraceae_bacterium_7_1_58FAA	0.398125	0.413292	0.70694	0.636903	1.70621	0.563613	0.996384
PWY-6277: superpathway of 5-aminoimidazole ribonucleotide biosynthesis|g__Lachnospiraceae_noname.s__Lachnospiraceae_bacterium_7_1_58FAA	0.398125	0.413292	0.70694	0.636903	1.70621	0.563613	0.996384
COBALSYN-PWY: adenosylcobalamin salvage from cobinamide I|g__Roseburia.s__Roseburia_intestinalis	1.48891	0.732996	3.83466	2.84073	-2.1693	0.565467	0.996384
ARGSYN-PWY: L-arginine biosynthesis I (via L-ornithine)|g__Bifidobacterium.s__Bifidobacterium_longum	2.11698	2.44198	6.5134	2.93704	0.721886	0.56569	0.996384
PWY-7400: L-arginine biosynthesis IV (archaebacteria)|g__Bifidobacterium.s__Bifidobacterium_longum	2.12152	2.44418	6.52047	2.94004	0.721493	0.56569	0.996384
PWY-6151: S-adenosyl-L-methionine cycle I	408.441	386.506	389.365	374.407	-0.0476314	0.567325	0.996384
PWY-6282: palmitoleate biosynthesis I (from (5Z)-dodec-5-enoate)|unclassified	26.7347	27.0017	23.9152	22.8771	0.631403	0.567325	0.996384
PWY-6353: purine nucleotides degradation II (aerobic)	34.072	40.1078	36.8617	33.7881	0.755431	0.567325	0.996384
PWY-6609: adenine and adenosine salvage III|unclassified	56.7006	58.0775	53.8315	53.5175	0.593496	0.567325	0.996384
PWY66-398: TCA cycle III (animals)	15.1208	19.4814	14.4826	17.1025	0.129625	0.567325	0.996384
RHAMCAT-PWY: L-rhamnose degradation I	160.375	168.459	140.993	149.201	0.042923	0.567325	0.996384
TCA: TCA cycle I (prokaryotic)	47.8139	52.3486	44.4888	50.0196	-0.0721269	0.567325	0.996384
PWY-6608: guanosine nucleotides degradation III|g__Parabacteroides.s__Parabacteroides_merdae	2.94054	3.18015	5.09247	4.5746	0.240499	0.56746	0.996384
PWY-2942: L-lysine biosynthesis III|g__Parabacteroides.s__Parabacteroides_distasonis	7.74497	5.63324	4.8351	2.69385	-0.142643	0.567969	0.996384
VALSYN-PWY: L-valine biosynthesis|g__Parabacteroides.s__Parabacteroides_distasonis	8.48974	6.24117	4.73618	3.27582	-0.183905	0.567969	0.996384
PWY-5097: L-lysine biosynthesis VI|g__Blautia.s__Ruminococcus_obeum	1.30196	1.04644	1.81939	2.24822	-0.244166	0.568609	0.996384
PWY-7219: adenosine ribonucleotides de novo biosynthesis|g__Blautia.s__Ruminococcus_obeum	2.19346	1.46765	2.30648	3.62295	-0.623278	0.569122	0.996384
PEPTIDOGLYCANSYN-PWY: peptidoglycan biosynthesis I (meso-diaminopimelate containing)|g__Blautia.s__Ruminococcus_torques	3.35533	2.96856	2.60357	2.52305	-0.683022	0.569495	0.996384
PWY-6737: starch degradation V|g__Ruminococcus.s__Ruminococcus_bromii	3.72691	4.83111	4.07593	5.11185	0.791262	0.570019	0.996384
PWY-5189: tetrapyrrole biosynthesis II (from glycine)|unclassified	5.01	5.58891	6.5058	6.29068	0.516133	0.570024	0.996384
ANAGLYCOLYSIS-PWY: glycolysis III (from glucose)|g__Bacteroides.s__Bacteroides_uniformis	34.1873	30.7601	42.2439	42.4872	0.776968	0.570452	0.996384
ARGSYNBSUB-PWY: L-arginine biosynthesis II (acetyl cycle)|g__Dorea.s__Dorea_longicatena	1.74972	0.893392	1.5179	1.37297	-2.07593	0.573501	0.996384
PWY66-400: glycolysis VI (metazoan)|g__Bacteroides.s__Bacteroides_stercoris	20.8052	25.2169	16.2721	20.6178	-0.373025	0.573501	0.996384
PWY-6122: 5-aminoimidazole ribonucleotide biosynthesis II|g__Collinsella.s__Collinsella_aerofaciens	5.41136	4.79015	6.59575	6.02472	-1.28426	0.576032	0.996384
PWY-6277: superpathway of 5-aminoimidazole ribonucleotide biosynthesis|g__Collinsella.s__Collinsella_aerofaciens	5.41136	4.79015	6.59575	6.02472	-1.28426	0.576032	0.996384
VALSYN-PWY: L-valine biosynthesis|g__Lachnospiraceae_noname.s__Lachnospiraceae_bacterium_7_1_58FAA	1.17732	1.03585	1.5996	1.43524	1.5638	0.576636	0.996384
PWY0-1296: purine ribonucleosides degradation|g__Blautia.s__Ruminococcus_obeum	1.61842	1.07666	1.93303	2.32644	-0.180499	0.577403	0.996384
PWY0-845: superpathway of pyridoxal 5'-phosphate biosynthesis and salvage|g__Bacteroides.s__Bacteroides_thetaiotaomicron	2.58824	3.44587	2.96804	5.3816	-1.31488	0.578404	0.996384
P441-PWY: superpathway of N-acetylneuraminate degradation	38.1459	38.7858	34.9967	39.3719	0.272018	0.579713	0.996384
PWY-5973: cis-vaccenate biosynthesis|unclassified	34.7962	38.779	33.9226	34.5938	0.622169	0.579713	0.996384
PWY-6317: galactose degradation I (Leloir pathway)|g__Clostridium.s__Clostridium_leptum	0.840891	0.800939	1.70491	0.989247	-0.954522	0.580941	0.996384
PWY-6608: guanosine nucleotides degradation III|g__Parabacteroides.s__Parabacteroides_distasonis	8.23189	5.7002	4.47411	2.95393	-0.156277	0.580941	0.996384
PWY66-422: D-galactose degradation V (Leloir pathway)|g__Clostridium.s__Clostridium_leptum	0.840891	0.800939	1.70491	0.989247	-0.954522	0.580941	0.996384
PWY-5097: L-lysine biosynthesis VI|g__Bacteroides.s__Bacteroides_stercoris	27.3311	31.3609	12.8529	21.0257	-0.159961	0.581353	0.996384
PWY-7228: superpathway of guanosine nucleotides de novo biosynthesis I|g__Bacteroides.s__Bacteroides_vulgatus	39.5539	42.1358	35.0839	35.8256	-0.021242	0.582699	0.996384
PWY-6317: galactose degradation I (Leloir pathway)|g__Dorea.s__Dorea_longicatena	1.31691	0.578165	0.957669	0.593471	-1.53205	0.582839	0.996384
PWY66-422: D-galactose degradation V (Leloir pathway)|g__Dorea.s__Dorea_longicatena	1.31691	0.578165	0.957669	0.593471	-1.53205	0.582839	0.996384
PWY-5097: L-lysine biosynthesis VI|g__Bacteroides.s__Bacteroides_dorei	7.10456	8.25615	6.46735	6.8125	-0.334271	0.582944	0.996384
UNINTEGRATED|g__Bacteroides.s__Bacteroides_ovatus	25508.5	27960.8	28730	29329.2	0.862861	0.582949	0.996384
PWY-2942: L-lysine biosynthesis III|g__Bacteroides.s__Bacteroides_dorei	8.36158	9.38475	7.34147	7.39004	-0.65191	0.58474	0.996384
PWY-6609: adenine and adenosine salvage III|g__Roseburia.s__Roseburia_intestinalis	1.29147	0.711101	2.14946	1.96881	-1.12767	0.58474	0.996384
PWY-7219: adenosine ribonucleotides de novo biosynthesis|g__Bacteroides.s__Bacteroides_xylanisolvens	2.58833	3.24468	1.67463	1.65837	-1.85654	0.586345	0.996384
PWY-6168: flavin biosynthesis III (fungi)|g__Bacteroides.s__Bacteroides_uniformis	32.0223	28.0201	40.6827	41.1868	0.822007	0.589197	0.996384
PWY0-1297: superpathway of purine deoxyribonucleosides degradation|g__Lachnospiraceae_noname.s__Lachnospiraceae_bacterium_5_1_63FAA	1.06859	1.02205	0.801964	1.0636	0.814696	0.591133	0.996384
PEPTIDOGLYCANSYN-PWY: peptidoglycan biosynthesis I (meso-diaminopimelate containing)|g__Bacteroides.s__Bacteroides_dorei	5.74107	5.86485	4.92047	5.19135	0.0836282	0.591878	0.996384
PWY-6387: UDP-N-acetylmuramoyl-pentapeptide biosynthesis I (meso-diaminopimelate containing)|g__Bacteroides.s__Bacteroides_dorei	5.70808	5.56555	4.80172	5.12976	0.0786411	0.591878	0.996384
PWY-7220: adenosine deoxyribonucleotides de novo biosynthesis II|g__Bacteroides.s__Bacteroides_thetaiotaomicron	2.85863	3.67011	3.93813	5.79068	1.36094	0.591983	0.996384
PWY-7222: guanosine deoxyribonucleotides de novo biosynthesis II|g__Bacteroides.s__Bacteroides_thetaiotaomicron	2.85863	3.67011	3.93813	5.79068	1.36094	0.591983	0.996384
COA-PWY: coenzyme A biosynthesis I|unclassified	28.7617	31.0779	27.5177	27.0467	0.490024	0.592224	0.996384
PWY-5659: GDP-mannose biosynthesis	94.3963	102.122	87.1018	84.2796	0.149045	0.592224	0.996384
PWY-5676: acetyl-CoA fermentation to butanoate II	41.276	39.2593	38.9531	41.2174	-0.680405	0.592224	0.996384
PWY-6385: peptidoglycan biosynthesis III (mycobacteria)	379.499	378.31	366.583	356.194	0.0350351	0.592224	0.996384
PWY-5083: NAD/NADH phosphorylation and dephosphorylation	2.76578	8.68006	1.56314	1.73553	0.616908	0.592714	0.996384
PANTO-PWY: phosphopantothenate biosynthesis I|g__Bacteroides.s__Bacteroides_thetaiotaomicron	3.48355	4.21936	3.87377	5.91652	-0.481921	0.593864	0.996384
PWY-6126: superpathway of adenosine nucleotides de novo biosynthesis II|g__Bacteroides.s__Bacteroides_vulgatus	37.114	37.2204	32.194	33.4073	-0.150823	0.594657	0.996384
PWY-5392: reductive TCA cycle II	5.56131	4.93348	3.77311	5.01836	-1.11843	0.595446	0.996384
PWY-5695: urate biosynthesis/inosine 5'-phosphate degradation|g__Bacteroides.s__Bacteroides_dorei	8.16674	9.54558	7.81651	7.87352	-0.615005	0.596004	0.996384
TRNA-CHARGING-PWY: tRNA charging|g__Bacteroides.s__Bacteroides_thetaiotaomicron	2.70034	3.77899	3.4551	5.76715	-0.0937447	0.598385	0.996384
PWY-6122: 5-aminoimidazole ribonucleotide biosynthesis II|g__Bacteroides.s__Bacteroides_xylanisolvens	2.61273	2.55542	1.28464	1.25502	-0.559177	0.60023	0.996384
PWY-6277: superpathway of 5-aminoimidazole ribonucleotide biosynthesis|g__Bacteroides.s__Bacteroides_xylanisolvens	2.61273	2.55542	1.28464	1.25502	-0.559177	0.60023	0.996384
ASPASN-PWY: superpathway of L-aspartate and L-asparagine biosynthesis|g__Roseburia.s__Roseburia_hominis	1.00004	1.4553	0.264927	0.294898	0.00126429	0.600655	0.996384
PWY-5154: L-arginine biosynthesis III (via N-acetyl-L-citrulline)|g__Alistipes.s__Alistipes_onderdonkii	4.97286	6.96487	7.79931	11.1463	-0.173406	0.60195	0.996384
PWY-6703: preQ0 biosynthesis|g__Lachnospiraceae_noname.s__Lachnospiraceae_bacterium_5_1_63FAA	0.940649	0.917722	0.673014	1.12376	-0.129819	0.60195	0.996384
UNINTEGRATED|g__Dorea.s__Dorea_longicatena	2448.49	1646.78	2138.79	1845.81	-0.142016	0.603991	0.996384
PWY-6284: superpathway of unsaturated fatty acids biosynthesis (E. coli)	55.5649	43.6175	57.7712	53.183	0.704491	0.604856	0.996384
PWY-6387: UDP-N-acetylmuramoyl-pentapeptide biosynthesis I (meso-diaminopimelate containing)|g__Blautia.s__Ruminococcus_obeum	1.10991	0.671715	1.40112	2.05667	-0.409268	0.605177	0.996384
PWY-7539: 6-hydroxymethyl-dihydropterin diphosphate biosynthesis III (Chlamydia)|g__Parabacteroides.s__Parabacteroides_distasonis	7.53512	5.04532	3.97628	2.89437	-0.0559904	0.605177	0.996384
PWY-7220: adenosine deoxyribonucleotides de novo biosynthesis II|g__Parabacteroides.s__Parabacteroides_merdae	3.29378	3.32696	5.2573	5.10967	0.578755	0.606141	0.996384
PWY-7222: guanosine deoxyribonucleotides de novo biosynthesis II|g__Parabacteroides.s__Parabacteroides_merdae	3.29378	3.32696	5.2573	5.10967	0.578755	0.606141	0.996384
PWY-6122: 5-aminoimidazole ribonucleotide biosynthesis II|g__Bacteroides.s__Bacteroides_thetaiotaomicron	2.84527	3.83681	3.63243	5.83308	-0.763518	0.606653	0.996384
PWY-6277: superpathway of 5-aminoimidazole ribonucleotide biosynthesis|g__Bacteroides.s__Bacteroides_thetaiotaomicron	2.84527	3.83681	3.63243	5.83308	-0.763518	0.606653	0.996384
PWY-6703: preQ0 biosynthesis|g__Bacteroides.s__Bacteroides_vulgatus	31.6884	31.9694	27.2447	28.5355	-0.563903	0.607426	0.996384
PWY-7220: adenosine deoxyribonucleotides de novo biosynthesis II|g__Bacteroides.s__Bacteroides_vulgatus	43.0019	43.5959	37.1649	37.2069	-0.0889409	0.60808	0.996384
PWY-7222: guanosine deoxyribonucleotides de novo biosynthesis II|g__Bacteroides.s__Bacteroides_vulgatus	43.0019	43.5959	37.1649	37.2069	-0.0889409	0.60808	0.996384
PWY-6125: superpathway of guanosine nucleotides de novo biosynthesis II|g__Bacteroides.s__Bacteroides_vulgatus	36.3261	38.1812	31.9239	33.2473	-0.0855302	0.61413	0.996384
DTDPRHAMSYN-PWY: dTDP-L-rhamnose biosynthesis I|g__Bacteroides.s__Bacteroides_caccae	5.15743	5.64352	4.42826	4.54007	0.877632	0.614986	0.996384
PWY-5154: L-arginine biosynthesis III (via N-acetyl-L-citrulline)|g__Bacteroides.s__Bacteroides_thetaiotaomicron	3.04035	4.10621	3.75687	6.38067	-0.517866	0.616045	0.996384
PWY-5971: palmitate biosynthesis II (bacteria and plants)	76.1958	83.2757	82.8528	82.192	1.26313	0.617605	0.996384
PWY-7184: pyrimidine deoxyribonucleotides de novo biosynthesis I	165.225	174.73	165.636	164.721	0.0859008	0.617605	0.996384
SALVADEHYPOX-PWY: adenosine nucleotides degradation II|unclassified	17.941	18.4576	17.3051	15.6196	0.599274	0.617605	0.996384
1CMET2-PWY: N10-formyl-tetrahydrofolate biosynthesis|g__Parabacteroides.s__Parabacteroides_distasonis	7.75818	5.20889	4.48504	2.78676	0.0449352	0.618609	0.996384
PWY-6386: UDP-N-acetylmuramoyl-pentapeptide biosynthesis II (lysine-containing)|g__Blautia.s__Ruminococcus_obeum	1.2097	0.752866	1.5097	2.17656	-0.405467	0.618609	0.996384
PWY-5103: L-isoleucine biosynthesis III|g__Lachnospiraceae_noname.s__Lachnospiraceae_bacterium_5_1_63FAA	1.59758	1.02834	1.3754	1.53046	-0.236413	0.619564	0.996384
PWY-7197: pyrimidine deoxyribonucleotide phosphorylation|g__Collinsella.s__Collinsella_aerofaciens	4.86378	5.34496	7.36121	6.19852	-0.451433	0.619564	0.996384
PWY0-1241: ADP-L-glycero-&beta;-D-manno-heptose biosynthesis	3.14465	6.24568	2.25191	2.43254	0.552337	0.619978	0.996384
HISDEG-PWY: L-histidine degradation I|g__Parabacteroides.s__Parabacteroides_distasonis	7.35407	5.08077	4.26723	2.3954	-0.209518	0.620667	0.996384
CALVIN-PWY: Calvin-Benson-Bassham cycle|g__Faecalibacterium.s__Faecalibacterium_prausnitzii	27.9287	31.1598	29.5791	29.8624	-0.490437	0.621064	0.996384
PWY-5097: L-lysine biosynthesis VI|g__Coprococcus.s__Coprococcus_comes	1.46629	1.04238	0.989859	1.06159	-0.761377	0.622516	0.996384
PWY-6122: 5-aminoimidazole ribonucleotide biosynthesis II|g__Ruminococcus.s__Ruminococcus_bromii	2.84328	4.5104	3.45721	4.73017	1.1943	0.622516	0.996384
PWY-6277: superpathway of 5-aminoimidazole ribonucleotide biosynthesis|g__Ruminococcus.s__Ruminococcus_bromii	2.84328	4.5104	3.45721	4.73017	1.1943	0.622516	0.996384
GLYCOL-GLYOXDEG-PWY: superpathway of glycol metabolism and degradation	1.26341	4.84539	0.810322	1.27834	0.941673	0.622594	0.996384
PWY-5667: CDP-diacylglycerol biosynthesis I|g__Dorea.s__Dorea_longicatena	1.60257	0.948879	1.15864	1.13373	-1.27634	0.624175	0.996384
PWY0-1319: CDP-diacylglycerol biosynthesis II|g__Dorea.s__Dorea_longicatena	1.60257	0.948879	1.15864	1.13373	-1.27634	0.624175	0.996384
GLYCOLYSIS: glycolysis I (from glucose 6-phosphate)|g__Bacteroides.s__Bacteroides_thetaiotaomicron	3.36025	4.50525	4.19452	6.67888	-0.225387	0.624303	0.996384
DTDPRHAMSYN-PWY: dTDP-L-rhamnose biosynthesis I|g__Bacteroides.s__Bacteroides_thetaiotaomicron	5.57856	7.32382	7.8917	10.9521	0.198402	0.626472	0.996384
PYRIDNUCSAL-PWY: NAD salvage pathway I	9.68101	11.8827	9.9623	8.92287	-2.26226	0.626472	0.996384
NONMEVIPP-PWY: methylerythritol phosphate pathway I|g__Blautia.s__Ruminococcus_obeum	1.33528	0.775089	1.34027	1.82802	-1.1643	0.629954	0.996384
PWY-6385: peptidoglycan biosynthesis III (mycobacteria)|g__Blautia.s__Ruminococcus_torques	1.58155	1.34772	1.27849	1.45011	-0.252487	0.630074	0.996384
DTDPRHAMSYN-PWY: dTDP-L-rhamnose biosynthesis I	388.791	391.453	404.947	405.143	0.0133208	0.630468	0.996384
PWY-6700: queuosine biosynthesis	369.32	369.562	347.745	336.652	0.0483548	0.630468	0.996384
PWY-3841: folate transformations II|g__Bacteroides.s__Bacteroides_vulgatus	29.6701	30.5295	26.7022	27.2448	-0.642032	0.633323	0.996384
PWY-6386: UDP-N-acetylmuramoyl-pentapeptide biosynthesis II (lysine-containing)|g__Bacteroides.s__Bacteroides_ovatus	7.25492	8.15038	10.1178	10.4428	0.150071	0.633323	0.996384
PWY-7229: superpathway of adenosine nucleotides de novo biosynthesis I|g__Bacteroides.s__Bacteroides_vulgatus	37.2971	37.4839	32.4417	34.0029	-0.159345	0.633323	0.996384
PYRIDOXSYN-PWY: pyridoxal 5'-phosphate biosynthesis I|g__Bacteroides.s__Bacteroides_ovatus	7.46064	9.24428	10.5697	10.1898	-0.551944	0.63405	0.996384
VALSYN-PWY: L-valine biosynthesis|g__Eubacterium.s__Eubacterium_hallii	1.68149	2.22065	2.65062	3.17022	0.194254	0.63405	0.996384
FASYN-INITIAL-PWY: superpathway of fatty acid biosynthesis initiation (E. coli)|g__Bacteroides.s__Bacteroides_ovatus	9.88067	12.6711	14.2892	15.3654	0.860591	0.634122	0.996384
PWY-5918: superpathay of heme biosynthesis from glutamate	14.0102	14.7185	13.0462	12.6469	0.0106961	0.634166	0.996384
DTDPRHAMSYN-PWY: dTDP-L-rhamnose biosynthesis I|g__Parabacteroides.s__Parabacteroides_distasonis	8.01987	5.39062	4.441	3.2701	-0.465139	0.634166	0.996384
GLYCOLYSIS: glycolysis I (from glucose 6-phosphate)|g__Bacteroides.s__Bacteroides_stercoris	23.862	27.7692	16.3221	21.0836	-0.395025	0.639008	0.996384
HISTSYN-PWY: L-histidine biosynthesis|g__Bacteroides.s__Bacteroides_uniformis	28.0565	24.3832	37.3487	35.8796	0.829044	0.640657	0.996384
FUCCAT-PWY: fucose degradation|unclassified	0.704647	1.00912	1.17158	0.927454	0.351636	0.64133	0.996384
NONMEVIPP-PWY: methylerythritol phosphate pathway I|g__Parabacteroides.s__Parabacteroides_distasonis	7.00188	4.50851	4.22937	2.44247	0.129062	0.64133	0.996384
PWY-1042: glycolysis IV (plant cytosol)|g__Dorea.s__Dorea_longicatena	3.21709	2.0962	2.59496	2.61967	0.189727	0.643294	0.996384
PWY-5022: 4-aminobutanoate degradation V	11.8648	19.4392	5.7045	6.6324	0.347078	0.643442	0.996384
PWY-5667: CDP-diacylglycerol biosynthesis I|unclassified	66.4091	70.9022	66.1543	64.773	0.550514	0.643442	0.996384
PWY0-1319: CDP-diacylglycerol biosynthesis II|unclassified	66.4091	70.9022	66.1543	64.773	0.550514	0.643442	0.996384
RHAMCAT-PWY: L-rhamnose degradation I|unclassified	18.663	18.3262	14.3087	14.6938	0.740736	0.643442	0.996384
VALSYN-PWY: L-valine biosynthesis|g__Eubacterium.s__Eubacterium_ramulus	0.908327	0.969073	0.673228	0.695932	-0.291704	0.644313	0.996384
PWY-5004: superpathway of L-citrulline metabolism	5.25802	4.33681	4.39837	3.77012	-0.1913	0.645266	0.996384
PWY-6121: 5-aminoimidazole ribonucleotide biosynthesis I|g__Dorea.s__Dorea_longicatena	1.5735	0.996624	1.26449	1.02842	-1.40896	0.646988	0.996384
PWY-6435: 4-hydroxybenzoate biosynthesis V	1.72869	1.9474	2.71342	2.36046	1.42737	0.649527	0.996384
PWY-7219: adenosine ribonucleotides de novo biosynthesis|g__Bacteroides.s__Bacteroides_dorei	9.09281	11.2946	8.37271	9.06842	-0.132196	0.649527	0.996384
PWY-5686: UMP biosynthesis|g__Anaerostipes.s__Anaerostipes_hadrus	0.667695	0.563089	0.871408	0.863525	0.561144	0.650632	0.996384
PWY-5695: urate biosynthesis/inosine 5'-phosphate degradation|g__Alistipes.s__Alistipes_onderdonkii	4.93751	7.57795	8.31805	11.2798	0.693611	0.650694	0.996384
PWY-5088: L-glutamate degradation VIII (to propanoate)	4.31039	4.14174	1.78364	4.44806	-1.15375	0.651086	0.996384
PYRIDNUCSAL-PWY: NAD salvage pathway I|unclassified	2.0578	2.59459	1.98155	1.65631	1.04435	0.652478	0.996384
P108-PWY: pyruvate fermentation to propanoate I|g__Bacteroides.s__Bacteroides_uniformis	28.0393	24.4373	36.1847	34.8632	0.831317	0.65381	0.996384
SER-GLYSYN-PWY: superpathway of L-serine and glycine biosynthesis I|g__Roseburia.s__Roseburia_inulinivorans	1.56006	1.36215	0.987043	0.962225	-0.776263	0.654814	0.996384
COA-PWY: coenzyme A biosynthesis I|g__Eubacterium.s__Eubacterium_eligens	2.73591	1.97376	1.76637	1.46939	-2.0305	0.655287	0.996384
PWY-3001: superpathway of L-isoleucine biosynthesis I|g__Bifidobacterium.s__Bifidobacterium_longum	2.37246	2.56912	6.55425	3.34898	0.0978206	0.655287	0.996384
NONMEVIPP-PWY: methylerythritol phosphate pathway I|g__Blautia.s__Ruminococcus_torques	1.59677	1.68846	1.64215	1.61968	0.618323	0.655781	0.996384
PWY-7389: superpathway of anaerobic energy metabolism (invertebrates)	16.6136	21.1866	20.4028	19.3145	0.879876	0.656523	0.996384
THRESYN-PWY: superpathway of L-threonine biosynthesis	156.498	164.694	167.32	172.401	0.0643431	0.656523	0.996384
PWY-6163: chorismate biosynthesis from 3-dehydroquinate|g__Eubacterium.s__Eubacterium_hallii	0.931915	1.13037	1.90384	2.2833	-1.06399	0.656627	0.996384
ILEUSYN-PWY: L-isoleucine biosynthesis I (from threonine)|g__Parabacteroides.s__Parabacteroides_distasonis	8.47379	6.0933	4.73618	3.27582	-0.307379	0.659661	0.996384
SER-GLYSYN-PWY: superpathway of L-serine and glycine biosynthesis I|g__Alistipes.s__Alistipes_finegoldii	0.973905	1.05951	1.76149	1.99897	0.63639	0.659812	0.996384
PWY-7111: pyruvate fermentation to isobutanol (engineered)|g__Bacteroides.s__Bacteroides_stercoris	36.116	36.1893	15.8892	19.9289	-0.0981809	0.660474	0.996384
VALSYN-PWY: L-valine biosynthesis|g__Bacteroides.s__Bacteroides_stercoris	36.116	36.1893	15.8892	19.9289	-0.0981809	0.660474	0.996384
PWY-6122: 5-aminoimidazole ribonucleotide biosynthesis II|g__Parabacteroides.s__Parabacteroides_distasonis	7.6843	4.96608	4.02971	2.45186	0.486042	0.66153	0.996384
PWY-6277: superpathway of 5-aminoimidazole ribonucleotide biosynthesis|g__Parabacteroides.s__Parabacteroides_distasonis	7.6843	4.96608	4.02971	2.45186	0.486042	0.66153	0.996384
ILEUSYN-PWY: L-isoleucine biosynthesis I (from threonine)|g__Eubacterium.s__Eubacterium_eligens	11.6777	7.92283	6.91579	6.89679	0.555995	0.664059	0.996384
PWY-5100: pyruvate fermentation to acetate and lactate II|g__Roseburia.s__Roseburia_hominis	1.57317	1.99602	0.449704	0.389118	-1.3584	0.666062	0.996384
PWY-5484: glycolysis II (from fructose 6-phosphate)|g__Bacteroides.s__Bacteroides_stercoris	19.6887	23.7744	15.2569	20.0538	-0.401998	0.666062	0.996384
PWY-6123: inosine-5'-phosphate biosynthesis I|g__Bacteroides.s__Bacteroides_ovatus	4.53602	6.22203	8.50114	7.71371	-1.47213	0.666577	0.996384
PWY-6125: superpathway of guanosine nucleotides de novo biosynthesis II|unclassified	18.7717	21.8948	18.7206	19.8125	-0.859016	0.666905	0.996384
PWY-7229: superpathway of adenosine nucleotides de novo biosynthesis I|g__Bacteroides.s__Bacteroides_thetaiotaomicron	3.09109	4.19278	3.57882	6.16868	0.985098	0.668319	0.996384
PWY-6527: stachyose degradation|g__Eubacterium.s__Eubacterium_siraeum	5.86116	6.10139	6.37383	2.79339	-0.0197752	0.669365	0.996384
COBALSYN-PWY: adenosylcobalamin salvage from cobinamide I	99.7834	85.5509	109.139	101.264	-0.0252642	0.669709	0.996384
P122-PWY: heterolactic fermentation	30.1864	36.153	33.19	36.1342	1.16624	0.669709	0.996384
P161-PWY: acetylene degradation	87.7301	90.7075	90.3806	87.5243	0.170931	0.669709	0.996384
PWY-3841: folate transformations II|g__Alistipes.s__Alistipes_onderdonkii	5.0023	7.20552	7.4734	10.8044	0.648181	0.670071	0.996384
PWY-7539: 6-hydroxymethyl-dihydropterin diphosphate biosynthesis III (Chlamydia)|g__Parabacteroides.s__Parabacteroides_merdae	2.90632	3.34349	4.86963	4.40726	0.177407	0.670071	0.996384
PWY-7229: superpathway of adenosine nucleotides de novo biosynthesis I|g__Bacteroides.s__Bacteroides_dorei	7.55248	10.0931	7.39649	8.37957	0.225506	0.671582	0.996384
PEPTIDOGLYCANSYN-PWY: peptidoglycan biosynthesis I (meso-diaminopimelate containing)|g__Lachnospiraceae_noname.s__Lachnospiraceae_bacterium_5_1_63FAA	1.42816	1.08681	1.19536	1.63144	-0.458853	0.671915	0.996384
UNINTEGRATED|g__Roseburia.s__Roseburia_inulinivorans	3340.49	3268.2	2966.3	4136.43	-3.34239	0.672355	0.996384
PWY-6151: S-adenosyl-L-methionine cycle I|g__Collinsella.s__Collinsella_aerofaciens	3.68151	3.58514	5.28711	5.29888	-0.864921	0.67272	0.996384
PANTO-PWY: phosphopantothenate biosynthesis I|g__Bacteroides.s__Bacteroides_ovatus	6.35565	7.91813	9.30611	9.2784	1.43905	0.673677	0.996384
HISDEG-PWY: L-histidine degradation I|g__Bacteroides.s__Bacteroides_dorei	7.9275	8.75101	6.92883	6.97545	0.172098	0.677007	0.996384
PWY-6122: 5-aminoimidazole ribonucleotide biosynthesis II|g__Bacteroides.s__Bacteroides_dorei	5.87521	7.40474	5.85219	6.16113	0.117104	0.677007	0.996384
PWY-6277: superpathway of 5-aminoimidazole ribonucleotide biosynthesis|g__Bacteroides.s__Bacteroides_dorei	5.87521	7.40474	5.85219	6.16113	0.117104	0.677007	0.996384
VALSYN-PWY: L-valine biosynthesis|g__Eubacterium.s__Eubacterium_eligens	11.6777	7.94206	6.91579	6.89679	0.900939	0.677531	0.996384
PWY-6386: UDP-N-acetylmuramoyl-pentapeptide biosynthesis II (lysine-containing)|g__Coprococcus.s__Coprococcus_comes	1.86585	1.27044	1.23122	1.24619	-0.73035	0.678459	0.996384
PWY-7111: pyruvate fermentation to isobutanol (engineered)|g__Roseburia.s__Roseburia_inulinivorans	2.12095	2.00301	1.54977	1.81454	-1.56804	0.678644	0.996384
UNINTEGRATED|g__Collinsella.s__Collinsella_aerofaciens	3208.92	2861.83	3773.34	3787.57	-1.80789	0.67996	0.996384
1CMET2-PWY: N10-formyl-tetrahydrofolate biosynthesis|g__Bacteroides.s__Bacteroides_uniformis	27.901	24.5421	36.2908	36.0141	0.357605	0.680439	0.996384
PWY-6122: 5-aminoimidazole ribonucleotide biosynthesis II|g__Bacteroides.s__Bacteroides_ovatus	5.56574	7.04101	8.76229	8.61341	-0.641943	0.680439	0.996384
PWY-6277: superpathway of 5-aminoimidazole ribonucleotide biosynthesis|g__Bacteroides.s__Bacteroides_ovatus	5.56574	7.04101	8.76229	8.61341	-0.641943	0.680439	0.996384
P562-PWY: myo-inositol degradation I|g__Lachnospiraceae_noname.s__Lachnospiraceae_bacterium_5_1_63FAA	1.30167	0.817547	1.57752	2.03172	-0.77459	0.680911	0.996384
PWY-5686: UMP biosynthesis|g__Dorea.s__Dorea_longicatena	1.71203	1.22526	1.93454	1.55353	0.59405	0.681933	0.996384
GLUTORN-PWY: L-ornithine biosynthesis|g__Bifidobacterium.s__Bifidobacterium_longum	2.23098	2.44068	6.09566	3.0858	0.945191	0.682357	0.996384
PWY-7208: superpathway of pyrimidine nucleobases salvage|g__Bacteroides.s__Bacteroides_thetaiotaomicron	2.84984	4.08162	3.27831	6.24089	0.265949	0.682833	0.996384
GLCMANNANAUT-PWY: superpathway of N-acetylglucosamine, N-acetylmannosamine and N-acetylneuraminate degradation	18.6934	22.5053	21.377	21.0388	-0.561381	0.682996	0.996384
P562-PWY: myo-inositol degradation I	4.53109	4.42448	4.91232	4.83749	-0.392131	0.682996	0.996384
PWY-7013: L-1,2-propanediol degradation	22.3672	23.0108	25.5382	28.972	0.413889	0.682996	0.996384
PWY-7221: guanosine ribonucleotides de novo biosynthesis	476.397	470.548	462.139	453.081	0.010531	0.682996	0.996384
PWY0-1586: peptidoglycan maturation (meso-diaminopimelate containing)|unclassified	28.1237	30.6022	26.5779	28.6478	0.184485	0.682996	0.996384
TRNA-CHARGING-PWY: tRNA charging	338.547	340.004	339.348	331.474	0.048929	0.682996	0.996384
PWY-6122: 5-aminoimidazole ribonucleotide biosynthesis II|g__Dorea.s__Dorea_longicatena	1.56198	0.977774	1.44181	1.17739	-1.66991	0.683621	0.996384
PWY-6277: superpathway of 5-aminoimidazole ribonucleotide biosynthesis|g__Dorea.s__Dorea_longicatena	1.56198	0.977774	1.44181	1.17739	-1.66991	0.683621	0.996384
PWY-6123: inosine-5'-phosphate biosynthesis I|g__Alistipes.s__Alistipes_onderdonkii	5.73693	8.07793	8.11578	11.9971	2.18676	0.684896	0.996384
UDPNAGSYN-PWY: UDP-N-acetyl-D-glucosamine biosynthesis I|g__Bifidobacterium.s__Bifidobacterium_longum	2.30264	2.51155	5.79032	3.19081	-0.292365	0.685371	0.996384
HISDEG-PWY: L-histidine degradation I|g__Parabacteroides.s__Parabacteroides_merdae	3.16904	3.24713	5.4374	5.16278	-0.110931	0.685399	0.996384
PWY-3841: folate transformations II|g__Parabacteroides.s__Parabacteroides_merdae	3.52114	3.63866	5.94597	5.45736	-0.163068	0.685399	0.996384
PWY-6385: peptidoglycan biosynthesis III (mycobacteria)|g__Lachnospiraceae_noname.s__Lachnospiraceae_bacterium_5_1_63FAA	1.40855	1.04046	1.2	1.62854	-0.461647	0.685399	0.996384
BRANCHED-CHAIN-AA-SYN-PWY: superpathway of branched amino acid biosynthesis|g__Bacteroides.s__Bacteroides_thetaiotaomicron	3.16141	4.43811	3.91002	6.02623	0.291898	0.685823	0.996384
PEPTIDOGLYCANSYN-PWY: peptidoglycan biosynthesis I (meso-diaminopimelate containing)|g__Faecalibacterium.s__Faecalibacterium_prausnitzii	21.0216	23.0936	19.2102	20.46	-0.556976	0.686869	0.996384
PWY66-400: glycolysis VI (metazoan)|g__Bacteroides.s__Bacteroides_uniformis	28.285	27.8305	25.3135	27.6868	0.3724	0.687097	0.996384
PWY-1042: glycolysis IV (plant cytosol)|g__Bacteroides.s__Bacteroides_ovatus	15.5899	16.7118	19.6777	18.6839	0.693632	0.687198	0.996384
PWY-6386: UDP-N-acetylmuramoyl-pentapeptide biosynthesis II (lysine-containing)|g__Anaerostipes.s__Anaerostipes_hadrus	1.15271	0.879199	1.58511	1.16609	0.358138	0.68762	0.996384
PWY-6387: UDP-N-acetylmuramoyl-pentapeptide biosynthesis I (meso-diaminopimelate containing)|g__Anaerostipes.s__Anaerostipes_hadrus	1.05065	0.795243	1.45137	1.09141	0.359454	0.68762	0.996384
PWY-6387: UDP-N-acetylmuramoyl-pentapeptide biosynthesis I (meso-diaminopimelate containing)|g__Parabacteroides.s__Parabacteroides_distasonis	7.60604	5.06416	4.42805	2.65966	-0.761456	0.689354	0.996384
PWY-7220: adenosine deoxyribonucleotides de novo biosynthesis II|g__Bacteroides.s__Bacteroides_stercoris	33.6891	34.8471	14.4128	19.055	-0.935928	0.691107	0.996384
PWY-7222: guanosine deoxyribonucleotides de novo biosynthesis II|g__Bacteroides.s__Bacteroides_stercoris	33.6891	34.8471	14.4128	19.055	-0.935928	0.691107	0.996384
TRPSYN-PWY: L-tryptophan biosynthesis|g__Bacteroides.s__Bacteroides_dorei	5.80007	6.82568	5.25833	5.77487	-0.0686431	0.69231	0.996384
PWY-821: superpathway of sulfur amino acid biosynthesis (Saccharomyces cerevisiae)	4.38757	8.25829	4.99106	3.03334	-0.15379	0.693557	0.996384
UNINTEGRATED|g__Clostridium.s__Clostridium_bolteae	1421.28	1701.44	3613.35	2526.11	-1.34447	0.693557	0.996384
PWY-7111: pyruvate fermentation to isobutanol (engineered)|g__Bacteroides.s__Bacteroides_uniformis	28.3485	25.0543	37.3866	36.7489	0.448512	0.693906	0.996384
VALSYN-PWY: L-valine biosynthesis|g__Bacteroides.s__Bacteroides_uniformis	28.3485	25.0543	37.3866	36.7489	0.448512	0.693906	0.996384
PWY-7115: C4 photosynthetic carbon assimilation cycle, NAD-ME type|unclassified	7.29592	7.68548	6.21574	7.04576	-1.07729	0.693962	0.996384
UNINTEGRATED|g__Faecalibacterium.s__Faecalibacterium_prausnitzii	35335.6	38053.7	37269.9	34607.4	0.847128	0.693962	0.996384
GLUCARDEG-PWY: D-glucarate degradation I|unclassified	1.05963	1.74541	1.14812	1.45236	1.61917	0.694667	0.996384
PWY-3841: folate transformations II|g__Bacteroides.s__Bacteroides_stercoris	37.0986	39.6742	17.149	21.8348	-1.45667	0.69565	0.996384
PWY-5723: Rubisco shunt	3.22599	8.18609	1.65038	1.62909	-2.33188	0.69565	0.996384
PWY-7111: pyruvate fermentation to isobutanol (engineered)|g__Dorea.s__Dorea_longicatena	2.09667	1.44393	2.03025	1.73224	-0.286909	0.697274	0.996384
PWY-6700: queuosine biosynthesis|g__Parabacteroides.s__Parabacteroides_merdae	3.34857	3.75913	5.63823	5.35943	0.130014	0.698984	0.996384
TRNA-CHARGING-PWY: tRNA charging|g__Parabacteroides.s__Parabacteroides_merdae	3.36078	3.46195	5.61926	5.29568	0.206061	0.698984	0.996384
UNINTEGRATED|g__Escherichia.s__Escherichia_coli	745.191	10498.2	1041.3	1113.35	-0.680873	0.699274	0.996384
BRANCHED-CHAIN-AA-SYN-PWY: superpathway of branched amino acid biosynthesis|g__Lachnospiraceae_noname.s__Lachnospiraceae_bacterium_5_1_63FAA	1.76318	1.18561	1.50784	1.71104	-0.19587	0.699391	0.996384
PWY-6385: peptidoglycan biosynthesis III (mycobacteria)|g__Collinsella.s__Collinsella_aerofaciens	4.30104	3.83123	4.80545	4.66851	-0.811762	0.699391	0.996384
PWY-6121: 5-aminoimidazole ribonucleotide biosynthesis I|g__Bacteroides.s__Bacteroides_ovatus	5.63928	6.95071	8.73696	8.85471	-1.67551	0.700397	0.996384
PWY-5097: L-lysine biosynthesis VI|g__Faecalibacterium.s__Faecalibacterium_prausnitzii	23.2318	24.0245	25.7161	23.1399	-0.467325	0.700525	0.996384
PWY-5100: pyruvate fermentation to acetate and lactate II|g__Blautia.s__Ruminococcus_torques	3.27305	2.96098	2.99783	2.72887	-0.428848	0.700677	0.996384
PWY-7228: superpathway of guanosine nucleotides de novo biosynthesis I|g__Parabacteroides.s__Parabacteroides_distasonis	8.71695	6.29621	5.0486	3.14859	-0.697382	0.703428	0.996384
PWY-6737: starch degradation V|g__Roseburia.s__Roseburia_inulinivorans	3.41376	2.8727	2.43446	2.28477	-0.70241	0.704783	0.996384
NONOXIPENT-PWY: pentose phosphate pathway (non-oxidative branch)|g__Collinsella.s__Collinsella_aerofaciens	2.75544	2.23434	4.18828	2.90644	-0.0990986	0.707067	0.996384
P108-PWY: pyruvate fermentation to propanoate I|g__Parabacteroides.s__Parabacteroides_distasonis	8.94869	6.11101	4.76125	3.54337	-1.2608	0.707067	0.996384
GALACT-GLUCUROCAT-PWY: superpathway of hexuronide and hexuronate degradation	44.4694	52.3701	39.8419	42.6184	0.734946	0.709858	0.996384
P124-PWY: Bifidobacterium shunt|unclassified	27.1679	26.5495	26.7457	28.3382	0.430873	0.709858	0.996384
P162-PWY: L-glutamate degradation V (via hydroxyglutarate)	20.5782	23.9022	22.6427	23.512	-0.459197	0.709858	0.996384
PWY-7115: C4 photosynthetic carbon assimilation cycle, NAD-ME type	32.6297	35.2738	39.2397	36.0594	0.610536	0.709858	0.996384
PWY-7220: adenosine deoxyribonucleotides de novo biosynthesis II	193.384	193.862	185.818	179.351	0.055435	0.709858	0.996384
PWY-7222: guanosine deoxyribonucleotides de novo biosynthesis II	193.384	193.862	185.818	179.351	0.055435	0.709858	0.996384
PWY-7229: superpathway of adenosine nucleotides de novo biosynthesis I|unclassified	49.1549	51.3953	48.1999	46.9797	0.887537	0.709858	0.996384
PWY-6471: peptidoglycan biosynthesis IV (Enterococcus faecium)	9.86991	5.44108	10.4748	13.8639	0.0897079	0.710299	0.996384
PWY-5103: L-isoleucine biosynthesis III|g__Dorea.s__Dorea_longicatena	1.97763	1.44609	1.937	1.72061	-0.316047	0.711026	0.996384
PWY-6387: UDP-N-acetylmuramoyl-pentapeptide biosynthesis I (meso-diaminopimelate containing)|g__Collinsella.s__Collinsella_aerofaciens	4.42461	3.94363	4.95427	4.83054	-0.835727	0.713056	0.996384
PWY-6317: galactose degradation I (Leloir pathway)|g__Coprococcus.s__Coprococcus_comes	1.66249	1.38195	1.08815	1.29337	-0.348471	0.713278	0.996384
PWY-7111: pyruvate fermentation to isobutanol (engineered)|g__Bifidobacterium.s__Bifidobacterium_longum	3.16293	3.65226	8.0934	4.33288	-0.790371	0.713278	0.996384
PWY66-422: D-galactose degradation V (Leloir pathway)|g__Coprococcus.s__Coprococcus_comes	1.66249	1.38195	1.08815	1.29337	-0.348471	0.713278	0.996384
PWY-5100: pyruvate fermentation to acetate and lactate II|g__Collinsella.s__Collinsella_aerofaciens	6.86068	5.79801	8.13665	7.22524	-1.27257	0.713645	0.996384
PWY-7219: adenosine ribonucleotides de novo biosynthesis|g__Bacteroides.s__Bacteroides_thetaiotaomicron	4.11277	5.25498	5.14319	7.22922	0.978989	0.713645	0.996384
PWY-5136: fatty acid &beta;-oxidation II (peroxisome)|unclassified	3.90953	4.28416	3.97696	3.58204	-1.3834	0.714231	0.996384
PWY66-399: gluconeogenesis III|unclassified	21.1043	25.1183	18.7205	19.788	0.224289	0.714324	0.996384
HISTSYN-PWY: L-histidine biosynthesis|g__Bacteroides.s__Bacteroides_stercoris	35.5317	37.7329	17.0418	21.0798	0.4552	0.715491	0.996384
PWY-7221: guanosine ribonucleotides de novo biosynthesis|g__Blautia.s__Ruminococcus_obeum	1.34176	0.857185	1.63984	2.10198	-1.61749	0.715491	0.996384
TRPSYN-PWY: L-tryptophan biosynthesis|g__Bacteroides.s__Bacteroides_stercoris	32.8597	34.6396	14.0296	18.7894	0.215697	0.715491	0.996384
PWY-6122: 5-aminoimidazole ribonucleotide biosynthesis II|g__Bifidobacterium.s__Bifidobacterium_longum	2.26532	2.43067	5.91782	3.04221	-0.219078	0.716012	0.996384
PWY-6277: superpathway of 5-aminoimidazole ribonucleotide biosynthesis|g__Bifidobacterium.s__Bifidobacterium_longum	2.26532	2.43067	5.91782	3.04221	-0.219078	0.716012	0.996384
OANTIGEN-PWY: O-antigen building blocks biosynthesis (E. coli)|g__Bifidobacterium.s__Bifidobacterium_longum	2.40697	2.21956	7.24393	3.21091	-0.0136612	0.717412	0.996384
UNINTEGRATED|g__Eubacterium.s__Eubacterium_siraeum	5231.76	5327.08	5660.72	2863.3	0.306377	0.719035	0.996384
PWY-1042: glycolysis IV (plant cytosol)|g__Bacteroides.s__Bacteroides_dorei	17.0453	20.2056	15.0545	16.8056	-1.22072	0.720317	0.996384
PWY-5030: L-histidine degradation III|g__Bacteroides.s__Bacteroides_stercoris	35.6899	37.2158	16.3919	20.9137	-0.884761	0.723383	0.996384
NONOXIPENT-PWY: pentose phosphate pathway (non-oxidative branch)|unclassified	55.0538	58.2194	53.9594	55.3624	-0.0216155	0.723425	0.996384
PWY-5189: tetrapyrrole biosynthesis II (from glycine)	49.9308	52.3146	55.2302	52.9266	0.0737964	0.723425	0.996384
PWY-6628: superpathway of L-phenylalanine biosynthesis|unclassified	18.7858	19.944	19.652	19.5738	-0.918267	0.723425	0.996384
PWY-7219: adenosine ribonucleotides de novo biosynthesis	663.24	650.453	650.156	630.401	0.0116016	0.723425	0.996384
PWY-7456: mannan degradation	87.1393	89.5022	87.1512	84.82	0.0637593	0.723425	0.996384
PWY-5686: UMP biosynthesis|g__Ruminococcus.s__Ruminococcus_bromii	4.0733	5.49393	4.60195	6.06122	0.824172	0.72473	0.996384
PWY-7220: adenosine deoxyribonucleotides de novo biosynthesis II|g__Bifidobacterium.s__Bifidobacterium_longum	2.79132	3.10886	7.89897	3.7149	-1.15293	0.72473	0.996384
PWY-7222: guanosine deoxyribonucleotides de novo biosynthesis II|g__Bifidobacterium.s__Bifidobacterium_longum	2.79132	3.10886	7.89897	3.7149	-1.15293	0.72473	0.996384
PWY-6737: starch degradation V|g__Dorea.s__Dorea_formicigenerans	0.663273	0.714388	1.01838	1.31487	-0.0295678	0.72644	0.996384
PWY-6317: galactose degradation I (Leloir pathway)|g__Lachnospiraceae_noname.s__Lachnospiraceae_bacterium_5_1_63FAA	1.71131	1.52085	1.37909	1.59618	-0.193025	0.726814	0.996384
GALACTUROCAT-PWY: D-galacturonate degradation I|g__Faecalibacterium.s__Faecalibacterium_prausnitzii	31.333	33.9676	32.4448	31.1635	-0.535227	0.728026	0.996384
PWY-5677: succinate fermentation to butanoate	3.37618	4.32302	3.9948	5.42198	0.205487	0.728026	0.996384
PWY-6353: purine nucleotides degradation II (aerobic)|unclassified	13.5808	12.3918	11.9911	12.146	-0.0984232	0.728026	0.996384
ASPASN-PWY: superpathway of L-aspartate and L-asparagine biosynthesis|g__Bacteroides.s__Bacteroides_stercoris	42.768	44.7686	19.3523	25.4469	-0.0674019	0.729493	0.996384
PANTO-PWY: phosphopantothenate biosynthesis I|g__Adlercreutzia.s__Adlercreutzia_equolifaciens	0.431324	0.663493	0.612531	0.651649	0.788048	0.73036	0.996384
PWY0-1586: peptidoglycan maturation (meso-diaminopimelate containing)|g__Escherichia.s__Escherichia_coli	0.702564	9.1536	0.983716	1.14276	0.614431	0.73036	0.996384
PWY-6387: UDP-N-acetylmuramoyl-pentapeptide biosynthesis I (meso-diaminopimelate containing)|g__Coprococcus.s__Coprococcus_comes	1.66668	1.16029	1.13945	1.12233	-0.700455	0.734466	0.996384
DTDPRHAMSYN-PWY: dTDP-L-rhamnose biosynthesis I|g__Faecalibacterium.s__Faecalibacterium_prausnitzii	34.2304	36.7975	35.5003	32.6064	0.591165	0.734927	0.996384
COMPLETE-ARO-PWY: superpathway of aromatic amino acid biosynthesis|g__Blautia.s__Ruminococcus_torques	2.46021	2.61049	1.91395	1.94968	-1.50362	0.735558	0.996384
PWY0-1296: purine ribonucleosides degradation|g__Roseburia.s__Roseburia_inulinivorans	1.92529	1.52854	1.24119	1.07478	-0.146949	0.736529	0.996384
GALACTUROCAT-PWY: D-galacturonate degradation I|unclassified	17.0223	18.8135	16.8887	17.3772	1.08806	0.737078	0.996384
PWY-5100: pyruvate fermentation to acetate and lactate II	220.545	217.148	235.434	228.933	0.0142167	0.737078	0.996384
UNINTEGRATED|g__Ruminococcus.s__Ruminococcus_bromii	2524.4	3759.22	3097.51	3627.78	4.06695	0.737389	0.996384
PWY-5667: CDP-diacylglycerol biosynthesis I|g__Eubacterium.s__Eubacterium_eligens	7.67499	5.25777	3.77663	4.21601	0.0191964	0.738146	0.996384
PWY-6507: 4-deoxy-L-threo-hex-4-enopyranuronate degradation|g__Eubacterium.s__Eubacterium_eligens	8.07123	6.35934	4.17751	5.05358	-0.571697	0.738146	0.996384
PWY0-1296: purine ribonucleosides degradation|g__Eubacterium.s__Eubacterium_eligens	7.68807	6.68657	4.31834	4.30101	0.574479	0.738146	0.996384
PWY0-1319: CDP-diacylglycerol biosynthesis II|g__Eubacterium.s__Eubacterium_eligens	7.67499	5.25777	3.77663	4.21601	0.0191964	0.738146	0.996384
VALSYN-PWY: L-valine biosynthesis|g__Parabacteroides.s__Parabacteroides_merdae	3.6789	3.71115	5.55489	5.55656	-0.265625	0.740304	0.996384
1CMET2-PWY: N10-formyl-tetrahydrofolate biosynthesis|g__Bacteroides.s__Bacteroides_vulgatus	30.5842	30.8121	26.588	27.0865	-1.26567	0.74066	0.996384
PWY-6122: 5-aminoimidazole ribonucleotide biosynthesis II|g__Dorea.s__Dorea_formicigenerans	0.562878	0.624673	0.665715	0.732679	-0.564146	0.74066	0.996384
PWY-6277: superpathway of 5-aminoimidazole ribonucleotide biosynthesis|g__Dorea.s__Dorea_formicigenerans	0.562878	0.624673	0.665715	0.732679	-0.564146	0.74066	0.996384
PWY-6386: UDP-N-acetylmuramoyl-pentapeptide biosynthesis II (lysine-containing)|g__Collinsella.s__Collinsella_aerofaciens	4.63034	4.0993	5.28672	5.17699	-0.854209	0.74066	0.996384
GLCMANNANAUT-PWY: superpathway of N-acetylglucosamine, N-acetylmannosamine and N-acetylneuraminate degradation|unclassified	3.08233	3.02646	3.08233	3.69808	0.749013	0.741197	0.996384
HISTSYN-PWY: L-histidine biosynthesis|g__Bacteroides.s__Bacteroides_ovatus	6.4682	7.81159	7.96941	8.35187	-0.753586	0.741539	0.996384
ASPASN-PWY: superpathway of L-aspartate and L-asparagine biosynthesis|g__Bacteroides.s__Bacteroides_ovatus	10.2406	10.4937	11.6396	12.2171	-0.536601	0.741651	0.996384
HEME-BIOSYNTHESIS-II: heme biosynthesis I (aerobic)	7.02719	7.22239	6.68994	6.623	-0.0170977	0.741816	0.996384
PWY-1042: glycolysis IV (plant cytosol)|g__Bacteroides.s__Bacteroides_uniformis	49.786	45.2524	58.894	58.2052	0.427842	0.741832	0.996384
UNINTEGRATED|g__Bacteroides.s__Bacteroides_uniformis	51838.8	45872.7	60473.7	61547.8	-0.976053	0.741832	0.996384
PWY-6168: flavin biosynthesis III (fungi)|g__Bacteroides.s__Bacteroides_stercoris	36.3729	38.5595	17.3975	22.2737	-0.00883039	0.743587	0.996384
PWY-6588: pyruvate fermentation to acetone|unclassified	2.87765	3.42369	4.15852	3.9588	0.0829032	0.743587	0.996384
BRANCHED-CHAIN-AA-SYN-PWY: superpathway of branched amino acid biosynthesis|g__Parabacteroides.s__Parabacteroides_distasonis	8.06115	5.68606	4.40185	2.91298	-0.364068	0.744803	0.996384
PWY-5097: L-lysine biosynthesis VI|g__Parabacteroides.s__Parabacteroides_distasonis	7.50263	5.35871	4.55394	2.56019	-0.24958	0.744803	0.996384
PWY-6147: 6-hydroxymethyl-dihydropterin diphosphate biosynthesis I|g__Parabacteroides.s__Parabacteroides_distasonis	7.6995	4.94579	4.23339	3.15674	0.523167	0.744803	0.996384
PWY-2942: L-lysine biosynthesis III|g__Alistipes.s__Alistipes_onderdonkii	4.96119	7.35047	7.78323	11.2767	0.304052	0.745164	0.996384
PWY-6317: galactose degradation I (Leloir pathway)|g__Roseburia.s__Roseburia_hominis	1.39876	2.49247	0.460404	0.543917	-1.48215	0.747544	0.996384
PWY66-422: D-galactose degradation V (Leloir pathway)|g__Roseburia.s__Roseburia_hominis	1.39876	2.49247	0.460404	0.543917	-1.48215	0.747544	0.996384
VALSYN-PWY: L-valine biosynthesis|g__Bacteroides.s__Bacteroides_dorei	6.54342	9.16954	6.24482	7.28385	0.146553	0.747544	0.996384
NONMEVIPP-PWY: methylerythritol phosphate pathway I|g__Bacteroides.s__Bacteroides_vulgatus	26.109	26.4675	20.1774	23.7998	-1.02559	0.747904	0.996384
VALSYN-PWY: L-valine biosynthesis|g__Clostridium.s__Clostridium_leptum	1.40424	1.05504	2.28865	1.46305	-0.616639	0.748581	0.996384
PWY-5030: L-histidine degradation III|g__Bacteroides.s__Bacteroides_uniformis	29.3491	24.8502	38.1085	36.7165	0.441174	0.748711	0.996384
PWY-6700: queuosine biosynthesis|g__Bacteroides.s__Bacteroides_uniformis	34.5892	30.1743	45.8083	44.5731	0.369388	0.748711	0.996384
PWY-7221: guanosine ribonucleotides de novo biosynthesis|g__Bacteroides.s__Bacteroides_xylanisolvens	3.37102	4.00657	1.97389	2.03545	-1.90121	0.750498	0.996384
1CMET2-PWY: N10-formyl-tetrahydrofolate biosynthesis	335.225	341.338	324.033	328.576	0.0135449	0.750814	0.996384
DAPLYSINESYN-PWY: L-lysine biosynthesis I	47.212	47.4245	46.5726	44.262	0.410523	0.750814	0.996384
PWY-5101: L-isoleucine biosynthesis II	38.9505	35.3981	43.9646	44.5625	0.462989	0.750814	0.996384
PWY-7199: pyrimidine deoxyribonucleosides salvage|unclassified	30.0474	31.8853	26.3707	29.5983	-0.500825	0.750814	0.996384
PWY-7663: gondoate biosynthesis (anaerobic)|unclassified	36.5809	39.7007	34.3801	33.4496	0.607075	0.750814	0.996384
UNINTEGRATED|g__Bifidobacterium.s__Bifidobacterium_longum	2858.31	3062.34	7299.73	3763.41	-0.463939	0.751483	0.996384
PWY-6936: seleno-amino acid biosynthesis|g__Eubacterium.s__Eubacterium_eligens	8.44469	6.15164	5.36842	4.67075	0.656745	0.752203	0.996384
PWY-6122: 5-aminoimidazole ribonucleotide biosynthesis II|g__Eubacterium.s__Eubacterium_eligens	9.31697	5.8277	4.67482	5.25935	0.288963	0.752832	0.996384
PWY-6277: superpathway of 5-aminoimidazole ribonucleotide biosynthesis|g__Eubacterium.s__Eubacterium_eligens	9.31697	5.8277	4.67482	5.25935	0.288963	0.752832	0.996384
PWY-7221: guanosine ribonucleotides de novo biosynthesis|g__Lachnospiraceae_noname.s__Lachnospiraceae_bacterium_5_1_63FAA	1.04041	1.04855	1.1073	1.41055	0.48161	0.753379	0.996384
ILEUSYN-PWY: L-isoleucine biosynthesis I (from threonine)|g__Roseburia.s__Roseburia_inulinivorans	2.46113	2.2351	1.79675	2.05117	-1.20932	0.753851	0.996384
PWY-6121: 5-aminoimidazole ribonucleotide biosynthesis I|g__Eubacterium.s__Eubacterium_hallii	0.758176	1.1241	1.48338	1.79365	0.495195	0.753851	0.996384
ILEUSYN-PWY: L-isoleucine biosynthesis I (from threonine)|g__Parabacteroides.s__Parabacteroides_merdae	3.6789	3.66706	5.55489	5.55656	-0.656552	0.754253	0.996384
PWY-6305: putrescine biosynthesis IV|g__Blautia.s__Ruminococcus_obeum	1.98404	1.32238	2.09984	2.76086	1.26901	0.754253	0.996384
COA-PWY-1: coenzyme A biosynthesis II (mammalian)|g__Faecalibacterium.s__Faecalibacterium_prausnitzii	21.9408	24.4656	26.6036	22.0082	0.182267	0.755532	0.996384
PWY-5103: L-isoleucine biosynthesis III|g__Eubacterium.s__Eubacterium_hallii	1.17562	1.71975	2.05928	2.35464	-0.056392	0.755608	0.996384
PWY-7219: adenosine ribonucleotides de novo biosynthesis|g__Faecalibacterium.s__Faecalibacterium_prausnitzii	48.2177	55.1756	51.5604	49.0378	-0.977056	0.755689	0.996384
PWY-5100: pyruvate fermentation to acetate and lactate II|g__Adlercreutzia.s__Adlercreutzia_equolifaciens	0.372314	0.535441	0.444957	0.418607	0.455534	0.759336	0.996384
PWY-6125: superpathway of guanosine nucleotides de novo biosynthesis II|g__Parabacteroides.s__Parabacteroides_distasonis	8.32323	6.11966	4.74033	2.99852	-0.709741	0.760703	0.996384
PWY-4242: pantothenate and coenzyme A biosynthesis III|g__Collinsella.s__Collinsella_aerofaciens	2.96726	2.53715	3.60601	3.24917	-0.918597	0.761257	0.996384
VALSYN-PWY: L-valine biosynthesis|g__Roseburia.s__Roseburia_inulinivorans	2.50382	2.29151	1.8696	2.13986	-0.886931	0.761257	0.996384
THISYNARA-PWY: superpathway of thiamin diphosphate biosynthesis III (eukaryotes)|g__Faecalibacterium.s__Faecalibacterium_prausnitzii	13.1774	13.047	17.505	13.8567	1.29772	0.76186	0.996384
DTDPRHAMSYN-PWY: dTDP-L-rhamnose biosynthesis I|g__Bifidobacterium.s__Bifidobacterium_longum	3.77833	4.08493	11.9776	4.43682	0.15527	0.761931	0.996384
PWY-6386: UDP-N-acetylmuramoyl-pentapeptide biosynthesis II (lysine-containing)|g__Bacteroides.s__Bacteroides_uniformis	30.031	25.9904	38.4515	38.0921	0.425242	0.762626	0.996384
TRPSYN-PWY: L-tryptophan biosynthesis|g__Bacteroides.s__Bacteroides_uniformis	27.6967	23.2413	35.2764	34.0715	0.441004	0.762626	0.996384
COA-PWY-1: coenzyme A biosynthesis II (mammalian)|g__Bacteroides.s__Bacteroides_stercoris	32.0934	33.9576	14.9134	20.2656	-0.899458	0.763031	0.996384
PWY-6700: queuosine biosynthesis|g__Bacteroides.s__Bacteroides_dorei	9.35224	9.09329	9.52694	9.23208	-0.1528	0.763031	0.996384
ARO-PWY: chorismate biosynthesis I|g__Blautia.s__Ruminococcus_torques	2.36612	2.56353	1.83136	1.87352	-1.47603	0.764013	0.996384
PWY-6121: 5-aminoimidazole ribonucleotide biosynthesis I|g__Bacteroides.s__Bacteroides_stercoris	37.902	39.7199	18.1274	22.1301	-0.438374	0.764013	0.996384
CALVIN-PWY: Calvin-Benson-Bassham cycle	383.365	379.841	388.258	374.38	0.0421687	0.764627	0.996384
PWY-5188: tetrapyrrole biosynthesis I (from glutamate)	78.1588	82.3617	78.1827	76.0953	0.0524155	0.764627	0.996384
PWY-6608: guanosine nucleotides degradation III|unclassified	20.6501	20.4523	19.4759	17.224	0.606109	0.764627	0.996384
PWY-7456: mannan degradation|unclassified	12.9682	13.9836	12.4876	12.4628	-0.904582	0.764627	0.996384
PWY-6126: superpathway of adenosine nucleotides de novo biosynthesis II|g__Bacteroides.s__Bacteroides_stercoris	38.1555	39.6192	16.8783	22.2424	-0.57399	0.764887	0.996384
PWY-7229: superpathway of adenosine nucleotides de novo biosynthesis I|g__Bacteroides.s__Bacteroides_stercoris	39.4306	41.119	17.7949	23.2403	-0.549161	0.764887	0.996384
PWY-7221: guanosine ribonucleotides de novo biosynthesis|g__Adlercreutzia.s__Adlercreutzia_equolifaciens	1.00462	1.15795	0.824427	0.882215	-0.241918	0.76566	0.996384
PWY-6122: 5-aminoimidazole ribonucleotide biosynthesis II|g__Roseburia.s__Roseburia_inulinivorans	1.63355	1.3824	0.99689	1.17929	-0.882764	0.766938	0.996384
PWY-6277: superpathway of 5-aminoimidazole ribonucleotide biosynthesis|g__Roseburia.s__Roseburia_inulinivorans	1.63355	1.3824	0.99689	1.17929	-0.882764	0.766938	0.996384
PWY-7539: 6-hydroxymethyl-dihydropterin diphosphate biosynthesis III (Chlamydia)|g__Bacteroides.s__Bacteroides_thetaiotaomicron	3.00705	4.02138	3.6548	6.33257	-0.0165773	0.766938	0.996384
NONMEVIPP-PWY: methylerythritol phosphate pathway I|g__Parabacteroides.s__Parabacteroides_merdae	2.91172	2.95079	5.35973	5.16206	-0.0985026	0.767455	0.996384
P108-PWY: pyruvate fermentation to propanoate I|g__Parabacteroides.s__Parabacteroides_merdae	3.98407	4.2275	6.25302	6.05015	-0.571467	0.767902	0.996384
PWY-5686: UMP biosynthesis|g__Alistipes.s__Alistipes_onderdonkii	5.50791	8.05561	8.34363	11.9744	1.06178	0.767902	0.996384
P108-PWY: pyruvate fermentation to propanoate I|g__Bacteroides.s__Bacteroides_dorei	6.33214	7.39708	5.83009	6.73227	-0.260086	0.767963	0.996384
PWY-7111: pyruvate fermentation to isobutanol (engineered)|g__Dorea.s__Dorea_formicigenerans	0.736672	0.888247	1.02275	1.10945	-1.6905	0.768602	0.996384
VALSYN-PWY: L-valine biosynthesis|g__Dorea.s__Dorea_formicigenerans	0.736672	0.888247	1.02275	1.10945	-1.6905	0.768602	0.996384
METHGLYUT-PWY: superpathway of methylglyoxal degradation	3.26162	5.76158	3.21457	2.89697	-0.82531	0.769258	0.996384
PWY-6113: superpathway of mycolate biosynthesis|unclassified	11.2888	13.3618	9.16785	11.3175	1.48187	0.769392	0.996384
PWY-7111: pyruvate fermentation to isobutanol (engineered)|g__Lachnospiraceae_noname.s__Lachnospiraceae_bacterium_7_1_58FAA	0.979551	0.759234	1.38505	1.17355	1.37835	0.769493	0.996384
PWY-5484: glycolysis II (from fructose 6-phosphate)|g__Bacteroides.s__Bacteroides_uniformis	28.8857	28.0198	25.3633	27.3322	0.416796	0.769565	0.996384
PWY-6531: mannitol cycle	1.35921	1.38815	1.14817	1.19365	-1.50744	0.769565	0.996384
PWY-5188: tetrapyrrole biosynthesis I (from glutamate)|unclassified	21.5737	19.6163	23.0036	21.189	-0.0196116	0.769656	0.996384
PWY4FS-7: phosphatidylglycerol biosynthesis I (plastidic)|unclassified	5.37053	6.50546	5.41079	6.88963	-2.23772	0.772524	0.996384
PWY4FS-8: phosphatidylglycerol biosynthesis II (non-plastidic)|unclassified	5.37053	6.50546	5.41079	6.88963	-2.23772	0.772524	0.996384
PWY-5103: L-isoleucine biosynthesis III|g__Parabacteroides.s__Parabacteroides_distasonis	7.63065	5.45882	4.18605	2.77881	-0.373809	0.773955	0.996384
PWY-6386: UDP-N-acetylmuramoyl-pentapeptide biosynthesis II (lysine-containing)|g__Parabacteroides.s__Parabacteroides_distasonis	7.11737	4.64109	4.09365	2.33983	-0.771445	0.775244	0.996384
HISTSYN-PWY: L-histidine biosynthesis|g__Bacteroides.s__Bacteroides_thetaiotaomicron	2.57154	3.62267	3.49192	5.00728	1.13891	0.775325	0.996384
UNINTEGRATED|g__Roseburia.s__Roseburia_hominis	2295.34	2844.25	1239.77	1275.07	-0.818861	0.775325	0.996384
PWY-7220: adenosine deoxyribonucleotides de novo biosynthesis II|g__Lachnospiraceae_noname.s__Lachnospiraceae_bacterium_7_1_58FAA	0.661863	0.570108	0.959778	0.769311	1.93951	0.775895	0.996384
PWY-7222: guanosine deoxyribonucleotides de novo biosynthesis II|g__Lachnospiraceae_noname.s__Lachnospiraceae_bacterium_7_1_58FAA	0.661863	0.570108	0.959778	0.769311	1.93951	0.775895	0.996384
PWY-7228: superpathway of guanosine nucleotides de novo biosynthesis I|g__Bacteroides.s__Bacteroides_ovatus	7.46934	8.81723	10.4553	10.8403	-0.171539	0.776274	0.996384
PWY-6121: 5-aminoimidazole ribonucleotide biosynthesis I|g__Bacteroides.s__Bacteroides_uniformis	30.1482	26.0771	38.4753	38.2684	-0.0678426	0.776618	0.996384
PWY-1042: glycolysis IV (plant cytosol)|g__Faecalibacterium.s__Faecalibacterium_prausnitzii	42.9796	45.8482	44.2721	41.6666	-0.14508	0.77666	0.996384
PANTOSYN-PWY: pantothenate and coenzyme A biosynthesis I|g__Eubacterium.s__Eubacterium_hallii	0.502535	0.664395	1.39636	1.58162	1.09191	0.776666	0.996384
HISTSYN-PWY: L-histidine biosynthesis	290.197	298.112	295.476	295.003	0.0407768	0.778514	0.996384
NONOXIPENT-PWY: pentose phosphate pathway (non-oxidative branch)	245.619	233.927	257.071	237.785	0.0286718	0.778514	0.996384
PWY0-1296: purine ribonucleosides degradation|unclassified	63.5787	67.5694	58.6992	59.6294	0.599581	0.778514	0.996384
PWY-5686: UMP biosynthesis|g__Blautia.s__Ruminococcus_obeum	1.26817	0.854673	1.53208	2.04852	1.14302	0.779188	0.996384
PWY-6121: 5-aminoimidazole ribonucleotide biosynthesis I|g__Roseburia.s__Roseburia_inulinivorans	1.65732	1.17289	0.938774	1.11414	-0.998843	0.779188	0.996384
ILEUSYN-PWY: L-isoleucine biosynthesis I (from threonine)|g__Dorea.s__Dorea_longicatena	2.5515	1.8909	2.50995	2.11677	-0.353575	0.781121	0.996384
VALSYN-PWY: L-valine biosynthesis|g__Dorea.s__Dorea_longicatena	2.5515	1.8909	2.50995	2.11677	-0.353575	0.781121	0.996384
PWY66-389: phytol degradation|unclassified	2.46308	2.95605	1.93118	2.50612	-2.88223	0.781609	0.996384
BRANCHED-CHAIN-AA-SYN-PWY: superpathway of branched amino acid biosynthesis|g__Roseburia.s__Roseburia_inulinivorans	2.09245	1.97578	1.53627	1.76024	-1.16536	0.782029	0.996384
PWY-5103: L-isoleucine biosynthesis III|g__Roseburia.s__Roseburia_inulinivorans	1.9775	1.85431	1.43989	1.63724	-1.15509	0.782029	0.996384
PWY-7663: gondoate biosynthesis (anaerobic)|g__Alistipes.s__Alistipes_onderdonkii	5.76646	8.14813	8.46332	12.2936	0.788774	0.782029	0.996384
1CMET2-PWY: N10-formyl-tetrahydrofolate biosynthesis|g__Lachnospiraceae_noname.s__Lachnospiraceae_bacterium_5_1_63FAA	0.872208	0.596901	0.651832	1.14231	-0.653266	0.782544	0.996384
ANAGLYCOLYSIS-PWY: glycolysis III (from glucose)|g__Collinsella.s__Collinsella_aerofaciens	4.81232	4.25931	5.89432	5.4404	-0.241688	0.782689	0.996384
PWY-6121: 5-aminoimidazole ribonucleotide biosynthesis I|g__Collinsella.s__Collinsella_aerofaciens	5.41577	4.80135	6.76014	6.23644	-0.940573	0.78294	0.996384
PWY-6863: pyruvate fermentation to hexanol|unclassified	4.66017	6.22619	5.14602	5.70025	0.628004	0.78294	0.996384
HISDEG-PWY: L-histidine degradation I|g__Bacteroides.s__Bacteroides_ovatus	7.75802	7.9561	10.0555	10.0872	-0.475112	0.783529	0.996384
PWY-7221: guanosine ribonucleotides de novo biosynthesis|g__Bacteroides.s__Bacteroides_ovatus	10.2908	11.3149	13.0065	13.5526	-0.154833	0.783597	0.996384
PWY66-400: glycolysis VI (metazoan)|g__Bacteroides.s__Bacteroides_thetaiotaomicron	3.71985	5.18558	4.5379	7.3982	-0.198851	0.788713	0.996384
PWY-2942: L-lysine biosynthesis III|g__Lachnospiraceae_noname.s__Lachnospiraceae_bacterium_5_1_63FAA	1.22329	0.98744	0.975477	1.12695	0.0496094	0.789468	0.996384
PWY-6737: starch degradation V|g__Blautia.s__Ruminococcus_obeum	1.51296	1.3776	1.9672	3.1481	-0.614305	0.789468	0.996384
PWY-7219: adenosine ribonucleotides de novo biosynthesis|g__Roseburia.s__Roseburia_hominis	2.35538	3.39261	1.05193	1.13925	0.0540927	0.789468	0.996384
PWY-6385: peptidoglycan biosynthesis III (mycobacteria)|g__Parabacteroides.s__Parabacteroides_distasonis	6.97088	4.61228	4.09744	2.39908	-0.697253	0.789864	0.996384
PWY-5154: L-arginine biosynthesis III (via N-acetyl-L-citrulline)|g__Bacteroides.s__Bacteroides_ovatus	9.0094	9.61589	11.3514	10.8591	-0.983674	0.790359	0.996384
DTDPRHAMSYN-PWY: dTDP-L-rhamnose biosynthesis I|unclassified	65.2968	66.9007	52.7664	55.0442	0.0613772	0.792471	0.996384
ILEUSYN-PWY: L-isoleucine biosynthesis I (from threonine)	463.832	462.032	455.378	446.105	0.0112678	0.792471	0.996384
P164-PWY: purine nucleobases degradation I (anaerobic)	33.5907	34.7789	32.0426	27.9426	0.606315	0.792471	0.996384
PWY-6113: superpathway of mycolate biosynthesis	74.3004	71.5358	80.6062	76.9186	1.0317	0.792471	0.996384
PWY0-1297: superpathway of purine deoxyribonucleosides degradation|unclassified	48.6343	50.2118	47.6347	46.5772	0.600319	0.792471	0.996384
TRPSYN-PWY: L-tryptophan biosynthesis	273.295	265.083	269.438	256.44	0.0461657	0.792471	0.996384
VALSYN-PWY: L-valine biosynthesis	463.832	462.032	455.378	446.105	0.0112678	0.792471	0.996384
NONMEVIPP-PWY: methylerythritol phosphate pathway I|g__Bacteroides.s__Bacteroides_stercoris	40.0714	41.3377	18.5363	23.7082	0.36941	0.792791	0.996384
PEPTIDOGLYCANSYN-PWY: peptidoglycan biosynthesis I (meso-diaminopimelate containing)|g__Bacteroides.s__Bacteroides_stercoris	40.5128	41.7375	18.321	23.3928	-0.363348	0.792791	0.996384
PWY0-1297: superpathway of purine deoxyribonucleosides degradation|g__Eubacterium.s__Eubacterium_eligens	7.72807	6.34703	4.19819	4.29899	0.239391	0.79485	0.996384
PWY-5103: L-isoleucine biosynthesis III|g__Alistipes.s__Alistipes_onderdonkii	5.00595	7.51803	8.33511	11.3462	1.12911	0.796229	0.996384
PWY-6122: 5-aminoimidazole ribonucleotide biosynthesis II|g__Alistipes.s__Alistipes_onderdonkii	4.84494	6.4861	6.93357	11.165	1.66017	0.796229	0.996384
PWY-6277: superpathway of 5-aminoimidazole ribonucleotide biosynthesis|g__Alistipes.s__Alistipes_onderdonkii	4.84494	6.4861	6.93357	11.165	1.66017	0.796229	0.996384
PWY-6168: flavin biosynthesis III (fungi)|g__Bacteroides.s__Bacteroides_vulgatus	33.1731	31.5937	28.8534	30.3168	-0.17267	0.796565	0.996384
ILEUSYN-PWY: L-isoleucine biosynthesis I (from threonine)|g__Lachnospiraceae_noname.s__Lachnospiraceae_bacterium_5_1_63FAA	2.13164	1.60137	1.78253	2.18715	-0.107071	0.796848	0.996384
PWY-6386: UDP-N-acetylmuramoyl-pentapeptide biosynthesis II (lysine-containing)|g__Lachnospiraceae_noname.s__Lachnospiraceae_bacterium_5_1_63FAA	1.80229	1.5422	1.52613	2.00587	-0.393198	0.796848	0.996384
PWY-3841: folate transformations II|g__Bacteroides.s__Bacteroides_ovatus	8.16521	8.3827	9.55509	9.8298	-1.4128	0.797083	0.996384
PWY-6703: preQ0 biosynthesis|g__Bacteroides.s__Bacteroides_ovatus	6.01992	8.40859	8.61112	8.67922	-0.705139	0.797547	0.996384
HISTSYN-PWY: L-histidine biosynthesis|g__Faecalibacterium.s__Faecalibacterium_prausnitzii	28.91	31.0447	29.1804	26.6805	-0.745274	0.797636	0.996384
BRANCHED-CHAIN-AA-SYN-PWY: superpathway of branched amino acid biosynthesis|g__Eubacterium.s__Eubacterium_hallii	1.29956	1.87535	2.26896	2.6362	-0.0609094	0.797699	0.996384
GLYCOLYSIS: glycolysis I (from glucose 6-phosphate)|g__Bacteroides.s__Bacteroides_uniformis	30.7488	28.858	28.4169	30.7435	0.375312	0.797699	0.996384
PWY-3841: folate transformations II|g__Bifidobacterium.s__Bifidobacterium_longum	1.72746	2.33616	6.18989	2.75445	0.255028	0.800786	0.996384
PWY-6121: 5-aminoimidazole ribonucleotide biosynthesis I|g__Alistipes.s__Alistipes_onderdonkii	4.59449	6.31423	6.34122	10.3254	1.73517	0.802973	0.996384
PWY-7219: adenosine ribonucleotides de novo biosynthesis|g__Lachnospiraceae_noname.s__Lachnospiraceae_bacterium_5_1_63FAA	2.12024	2.04209	1.76233	2.44046	0.501188	0.80418	0.996384
PWY-7357: thiamin formation from pyrithiamine and oxythiamine (yeast)|g__Faecalibacterium.s__Faecalibacterium_prausnitzii	16.1437	15.1074	19.533	16.0527	1.28713	0.80418	0.996384
PWY0-1586: peptidoglycan maturation (meso-diaminopimelate containing)|g__Lachnospiraceae_noname.s__Lachnospiraceae_bacterium_5_1_63FAA	1.38687	1.02481	1.32262	1.56904	-0.812078	0.80418	0.996384
TRPSYN-PWY: L-tryptophan biosynthesis|g__Eubacterium.s__Eubacterium_rectale	25.2785	14.0514	31.1009	19.2348	0.667616	0.80418	0.996384
HOMOSER-METSYN-PWY: L-methionine biosynthesis I|g__Bifidobacterium.s__Bifidobacterium_longum	2.35304	2.32943	6.41072	3.43296	-1.03386	0.804558	0.996384
UNINTEGRATED|g__Parabacteroides.s__Parabacteroides_distasonis	15005.4	11391.5	9022.66	6101.04	-0.76756	0.804558	0.996384
PWY-3841: folate transformations II|g__Bacteroides.s__Bacteroides_uniformis	29.6421	26.0426	38.2849	37.5969	0.400124	0.804816	0.996384
ANAGLYCOLYSIS-PWY: glycolysis III (from glucose)	463.235	468.259	457.168	450.381	0.036647	0.806494	0.996384
ANAGLYCOLYSIS-PWY: glycolysis III (from glucose)|unclassified	59.8659	60.3701	58.7962	55.5657	0.601777	0.806494	0.996384
GLUCUROCAT-PWY: superpathway of &beta;-D-glucuronide and D-glucuronate degradation	33.0699	39.7073	28.7883	31.3205	0.718798	0.806494	0.996384
GLUCUROCAT-PWY: superpathway of &beta;-D-glucuronide and D-glucuronate degradation|unclassified	21.724	23.6999	19.7227	20.8797	0.596035	0.806494	0.996384
NONMEVIPP-PWY: methylerythritol phosphate pathway I	444.85	435.096	436.089	418.874	0.0264229	0.806494	0.996384
PANTOSYN-PWY: pantothenate and coenzyme A biosynthesis I	229.896	223.772	240.972	230.793	0.0249213	0.806494	0.996384
PWY-6126: superpathway of adenosine nucleotides de novo biosynthesis II|unclassified	37.8009	38.0742	37.4246	36.2568	1.17985	0.806494	0.996384
PWY-6969: TCA cycle V (2-oxoglutarate:ferredoxin oxidoreductase)	45.255	49.0862	40.1962	41.7659	0.562426	0.806494	0.996384
PWY-7199: pyrimidine deoxyribonucleosides salvage	91.9678	98.5873	94.668	98.3897	0.0788588	0.806494	0.996384
PWY-724: superpathway of L-lysine, L-threonine and L-methionine biosynthesis II|g__Alistipes.s__Alistipes_onderdonkii	4.62441	7.07224	7.27125	10.7293	0.0139534	0.807289	0.996384
DTDPRHAMSYN-PWY: dTDP-L-rhamnose biosynthesis I|g__Bacteroides.s__Bacteroides_stercoris	37.7085	39.3377	17.4523	23.7317	0.104426	0.808648	0.996384
PWY-6122: 5-aminoimidazole ribonucleotide biosynthesis II|g__Bacteroides.s__Bacteroides_stercoris	37.8958	39.9859	18.2386	22.3142	-0.23507	0.808648	0.996384
PWY-6277: superpathway of 5-aminoimidazole ribonucleotide biosynthesis|g__Bacteroides.s__Bacteroides_stercoris	37.8958	39.9859	18.2386	22.3142	-0.23507	0.808648	0.996384
PWY-7219: adenosine ribonucleotides de novo biosynthesis|g__Ruminococcus.s__Ruminococcus_bromii	5.66759	7.72926	7.00547	7.69916	2.15643	0.808648	0.996384
PWY-7221: guanosine ribonucleotides de novo biosynthesis|g__Alistipes.s__Alistipes_onderdonkii	4.39373	6.81231	7.9886	11.5103	0.210812	0.80921	0.996384
ARO-PWY: chorismate biosynthesis I|g__Roseburia.s__Roseburia_inulinivorans	1.31402	1.24978	0.994463	0.76069	-0.400039	0.809636	0.996384
PWY-6151: S-adenosyl-L-methionine cycle I|g__Eubacterium.s__Eubacterium_eligens	10.3888	6.13943	5.0246	5.34323	0.404364	0.809701	0.996384
PWY-7013: L-1,2-propanediol degradation|g__Eubacterium.s__Eubacterium_hallii	1.45115	1.73999	2.1053	3.15121	-1.30152	0.809701	0.996384
PWY-7197: pyrimidine deoxyribonucleotide phosphorylation|g__Bacteroides.s__Bacteroides_thetaiotaomicron	2.86565	3.42476	4.2899	5.89573	0.656437	0.809701	0.996384
PWY-5667: CDP-diacylglycerol biosynthesis I|g__Parabacteroides.s__Parabacteroides_merdae	2.78677	2.85058	4.72805	3.95534	0.292352	0.810496	0.996384
PWY0-1319: CDP-diacylglycerol biosynthesis II|g__Parabacteroides.s__Parabacteroides_merdae	2.78677	2.85058	4.72805	3.95534	0.292352	0.810496	0.996384
PWY-7221: guanosine ribonucleotides de novo biosynthesis|g__Bacteroides.s__Bacteroides_thetaiotaomicron	4.07495	5.0488	5.44619	7.65255	0.349157	0.81081	0.996384
PWY-7228: superpathway of guanosine nucleotides de novo biosynthesis I|g__Collinsella.s__Collinsella_aerofaciens	4.57689	4.42864	5.9406	5.214	-0.368795	0.811074	0.996384
VALSYN-PWY: L-valine biosynthesis|g__Lachnospiraceae_noname.s__Lachnospiraceae_bacterium_5_1_63FAA	2.13164	1.60137	1.79966	2.21914	-0.434654	0.811472	0.996384
UNINTEGRATED|g__Eubacterium.s__Eubacterium_hallii	1364.31	1580.15	2194.44	2501.95	-0.601541	0.811868	0.996384
GALACTARDEG-PWY: D-galactarate degradation I|g__Lachnospiraceae_noname.s__Lachnospiraceae_bacterium_7_1_58FAA	0.425387	0.532428	0.576494	0.457373	0.397661	0.815258	0.996384
GLUCARGALACTSUPER-PWY: superpathway of D-glucarate and D-galactarate degradation|g__Lachnospiraceae_noname.s__Lachnospiraceae_bacterium_7_1_58FAA	0.425387	0.532428	0.576494	0.457373	0.397661	0.815258	0.996384
BRANCHED-CHAIN-AA-SYN-PWY: superpathway of branched amino acid biosynthesis|g__Eubacterium.s__Eubacterium_eligens	10.9995	7.63292	6.03518	6.31671	0.52982	0.8173	0.996384
1CMET2-PWY: N10-formyl-tetrahydrofolate biosynthesis|g__Bacteroides.s__Bacteroides_ovatus	7.60215	7.58178	8.80527	8.92654	-1.01924	0.817956	0.996384
COA-PWY-1: coenzyme A biosynthesis II (mammalian)|g__Dorea.s__Dorea_longicatena	1.14703	0.579228	0.901094	0.529242	-0.907951	0.818275	0.996384
NONMEVIPP-PWY: methylerythritol phosphate pathway I|g__Bacteroides.s__Bacteroides_uniformis	31.3022	26.9785	40.5849	39.7512	0.352472	0.819014	0.996384
ASPASN-PWY: superpathway of L-aspartate and L-asparagine biosynthesis|unclassified	27.3435	28.2434	27.5254	28.3763	-0.0511255	0.820579	0.996384
COA-PWY-1: coenzyme A biosynthesis II (mammalian)|unclassified	82.4819	85.5726	78.6092	76.0996	0.576514	0.820579	0.996384
PWY-6507: 4-deoxy-L-threo-hex-4-enopyranuronate degradation	35.0957	38.4539	25.8776	28.9262	0.598909	0.820579	0.996384
UNINTEGRATED|g__Bacteroides.s__Bacteroides_dorei	14901	16840.5	15542.2	16117.9	-2.49089	0.821102	0.996384
PWY-6386: UDP-N-acetylmuramoyl-pentapeptide biosynthesis II (lysine-containing)|g__Bacteroides.s__Bacteroides_stercoris	40.1959	41.2303	17.7991	23.3327	0.0159156	0.821854	0.996384
PWY-6387: UDP-N-acetylmuramoyl-pentapeptide biosynthesis I (meso-diaminopimelate containing)|g__Bacteroides.s__Bacteroides_stercoris	40.775	41.805	18.2954	23.4864	-0.380085	0.821854	0.996384
PWY-7221: guanosine ribonucleotides de novo biosynthesis|g__Eubacterium.s__Eubacterium_eligens	9.31828	5.98745	4.78305	4.55476	0.283246	0.823114	0.996384
PWY-2942: L-lysine biosynthesis III|g__Bacteroides.s__Bacteroides_xylanisolvens	2.3261	2.68802	1.28137	1.35004	-1.14965	0.824606	0.996384
BRANCHED-CHAIN-AA-SYN-PWY: superpathway of branched amino acid biosynthesis|g__Alistipes.s__Alistipes_onderdonkii	5.45289	7.98293	8.81121	12.1682	1.0863	0.824827	0.996384
ILEUSYN-PWY: L-isoleucine biosynthesis I (from threonine)|g__Alistipes.s__Alistipes_onderdonkii	5.63469	8.04848	8.86158	12.5739	1.12201	0.824827	0.996384
PWY-6121: 5-aminoimidazole ribonucleotide biosynthesis I|g__Bacteroides.s__Bacteroides_thetaiotaomicron	2.92442	3.73734	3.65489	5.38675	0.271524	0.824827	0.996384
PWY-7221: guanosine ribonucleotides de novo biosynthesis|g__Eubacterium.s__Eubacterium_hallii	1.0178	1.36334	1.72522	2.07274	0.840466	0.825732	0.996384
PWY-6387: UDP-N-acetylmuramoyl-pentapeptide biosynthesis I (meso-diaminopimelate containing)|g__Bacteroides.s__Bacteroides_ovatus	7.83274	8.6882	10.841	10.9797	-0.129042	0.826044	0.996384
PWY-7219: adenosine ribonucleotides de novo biosynthesis|g__Bifidobacterium.s__Bifidobacterium_longum	3.35094	3.63876	8.4282	4.4843	-0.438129	0.830929	0.996384
COA-PWY-1: coenzyme A biosynthesis II (mammalian)|g__Bacteroides.s__Bacteroides_vulgatus	26.3931	27.1571	22.3338	22.8733	-1.67343	0.832724	0.996384
PWY-6737: starch degradation V|g__Clostridium.s__Clostridium_leptum	1.95567	1.74191	3.11247	2.2277	-1.4688	0.832724	0.996384
PWY-7208: superpathway of pyrimidine nucleobases salvage|g__Parabacteroides.s__Parabacteroides_distasonis	6.75733	4.96497	3.8729	2.30912	0.0476058	0.833186	0.996384
PEPTIDOGLYCANSYN-PWY: peptidoglycan biosynthesis I (meso-diaminopimelate containing)|g__Bacteroides.s__Bacteroides_uniformis	30.79	26.7177	39.5774	39.0024	0.437235	0.833271	0.996384
GOLPDLCAT-PWY: superpathway of glycerol degradation to 1,3-propanediol	17.2683	17.8133	19.6465	19.3501	0.57022	0.83472	0.996384
PWY-5505: L-glutamate and L-glutamine biosynthesis	75.12	76.0224	73.2606	79.0473	0.446118	0.83472	0.996384
PWY0-1297: superpathway of purine deoxyribonucleosides degradation	125.763	123.539	126.244	121.886	0.101151	0.83472	0.996384
1CMET2-PWY: N10-formyl-tetrahydrofolate biosynthesis|g__Bacteroides.s__Bacteroides_stercoris	36.8293	39.5653	16.6736	21.6196	-0.0636632	0.835014	0.996384
PWY-6385: peptidoglycan biosynthesis III (mycobacteria)|g__Bacteroides.s__Bacteroides_stercoris	39.2977	40.1513	17.3424	22.4988	0.0340482	0.83648	0.996384
DTDPRHAMSYN-PWY: dTDP-L-rhamnose biosynthesis I|g__Dorea.s__Dorea_longicatena	1.62678	1.13574	1.30048	1.52901	-0.594884	0.83764	0.996384
COA-PWY-1: coenzyme A biosynthesis II (mammalian)|g__Bacteroides.s__Bacteroides_thetaiotaomicron	2.4167	2.95411	3.09736	4.27079	-1.36191	0.838119	0.996384
BRANCHED-CHAIN-AA-SYN-PWY: superpathway of branched amino acid biosynthesis|g__Dorea.s__Dorea_longicatena	2.11582	1.57107	2.10132	1.82995	-0.328999	0.838538	0.996384
PEPTIDOGLYCANSYN-PWY: peptidoglycan biosynthesis I (meso-diaminopimelate containing)|g__Alistipes.s__Alistipes_onderdonkii	4.70454	7.18333	7.50888	10.7031	0.333041	0.838538	0.996384
NONMEVIPP-PWY: methylerythritol phosphate pathway I|g__Bacteroides.s__Bacteroides_thetaiotaomicron	3.21859	4.25747	3.86613	6.31962	-0.435109	0.839217	0.996384
PWY-3841: folate transformations II|g__Bacteroides.s__Bacteroides_thetaiotaomicron	2.90515	4.19064	3.3924	5.60453	-0.854384	0.839217	0.996384
PWY-5101: L-isoleucine biosynthesis II|g__Lachnospiraceae_noname.s__Lachnospiraceae_bacterium_5_1_63FAA	1.45212	1.17593	1.29241	1.77179	0.685666	0.839217	0.996384
PWY-6168: flavin biosynthesis III (fungi)|g__Parabacteroides.s__Parabacteroides_merdae	3.58635	3.67647	5.62554	5.27416	-0.0347222	0.839217	0.996384
PWY-621: sucrose degradation III (sucrose invertase)|g__Lachnospiraceae_noname.s__Lachnospiraceae_bacterium_5_1_63FAA	2.28467	1.64246	2.10161	2.22832	0.0777953	0.840049	0.996384
RIBOSYN2-PWY: flavin biosynthesis I (bacteria and plants)|g__Faecalibacterium.s__Faecalibacterium_prausnitzii	26.3496	27.8377	26.7016	23.2603	-0.409926	0.840171	0.996384
PWY-6385: peptidoglycan biosynthesis III (mycobacteria)|g__Faecalibacterium.s__Faecalibacterium_prausnitzii	20.796	23.0434	19.0576	19.9526	-0.502531	0.840265	0.996384
PWY-7219: adenosine ribonucleotides de novo biosynthesis|g__Bacteroides.s__Bacteroides_ovatus	10.9671	11.2482	13.0077	13.3129	-0.364467	0.84042	0.996384
ILEUSYN-PWY: L-isoleucine biosynthesis I (from threonine)|g__Roseburia.s__Roseburia_hominis	1.41209	2.16899	0.554874	0.610068	0.111233	0.843154	0.996384
PWY-7111: pyruvate fermentation to isobutanol (engineered)|g__Eubacterium.s__Eubacterium_ramulus	0.83649	0.825387	0.583973	0.584575	-0.622762	0.843154	0.996384
PWY-5692: allantoin degradation to glyoxylate II	0.69934	0.827968	0.708155	1.04495	-1.11142	0.844403	0.996384
URDEGR-PWY: superpathway of allantoin degradation in plants	0.69934	0.827968	0.708155	1.04495	-1.11142	0.844403	0.996384
ASPASN-PWY: superpathway of L-aspartate and L-asparagine biosynthesis|g__Dorea.s__Dorea_longicatena	1.31063	0.70075	1.32969	0.983217	-1.26506	0.845382	0.996384
PWY-5097: L-lysine biosynthesis VI|g__Alistipes.s__Alistipes_onderdonkii	4.93943	7.38372	7.74841	11.2538	0.271513	0.845382	0.996384
PWY-5103: L-isoleucine biosynthesis III|g__Eubacterium.s__Eubacterium_eligens	10.6988	7.46653	5.64742	6.08115	0.507268	0.846132	0.996384
P108-PWY: pyruvate fermentation to propanoate I|g__Bacteroides.s__Bacteroides_ovatus	7.20866	8.91181	9.81806	11.7413	0.208391	0.847583	0.996384
PWY-7221: guanosine ribonucleotides de novo biosynthesis|g__Bacteroides.s__Bacteroides_uniformis	31.9327	26.7965	40.6477	41.5108	0.673251	0.847583	0.996384
COA-PWY-1: coenzyme A biosynthesis II (mammalian)|g__Parabacteroides.s__Parabacteroides_distasonis	6.62052	4.31847	3.48723	2.35207	-0.284148	0.848157	0.996384
PWY-6121: 5-aminoimidazole ribonucleotide biosynthesis I|g__Dorea.s__Dorea_formicigenerans	0.276132	0.32629	0.444727	0.368315	0.287509	0.848157	0.996384
HSERMETANA-PWY: L-methionine biosynthesis III	72.2957	71.6459	75.4435	72.2441	0.579847	0.848914	0.996384
PWY-5973: cis-vaccenate biosynthesis	104.35	98.3179	111.956	96.345	0.0961139	0.848914	0.996384
PWY-7221: guanosine ribonucleotides de novo biosynthesis|g__Parabacteroides.s__Parabacteroides_distasonis	9.5153	6.94263	5.71547	3.46061	-0.262867	0.849036	0.996384
SER-GLYSYN-PWY: superpathway of L-serine and glycine biosynthesis I|g__Coprococcus.s__Coprococcus_comes	1.91445	1.3083	1.53725	1.37748	-1.28625	0.849825	0.996384
1CMET2-PWY: N10-formyl-tetrahydrofolate biosynthesis|g__Alistipes.s__Alistipes_onderdonkii	4.5395	6.4532	6.97666	10.2263	0.56886	0.852221	0.996384
VALSYN-PWY: L-valine biosynthesis|g__Ruminococcus.s__Ruminococcus_bromii	6.37504	9.13535	7.56559	8.83053	2.41089	0.852221	0.996384
COA-PWY-1: coenzyme A biosynthesis II (mammalian)|g__Eubacterium.s__Eubacterium_eligens	2.65469	1.97034	1.763	1.49443	-1.55686	0.852562	0.996384
PANTO-PWY: phosphopantothenate biosynthesis I|g__Bacteroides.s__Bacteroides_caccae	4.40699	4.75137	4.12427	4.70243	0.335917	0.852659	0.996384
PWY-5667: CDP-diacylglycerol biosynthesis I|g__Eubacterium.s__Eubacterium_hallii	0.601307	0.789047	1.54872	1.6946	0.372033	0.853041	0.996384
PWY0-1319: CDP-diacylglycerol biosynthesis II|g__Eubacterium.s__Eubacterium_hallii	0.601307	0.789047	1.54872	1.6946	0.372033	0.853041	0.996384
TRPSYN-PWY: L-tryptophan biosynthesis|g__Bacteroides.s__Bacteroides_thetaiotaomicron	1.91751	3.10073	2.71564	4.54363	0.183117	0.853041	0.996384
COA-PWY-1: coenzyme A biosynthesis II (mammalian)|g__Parabacteroides.s__Parabacteroides_merdae	2.36254	2.75961	4.73993	4.22465	0.220522	0.853374	0.996384
PWY-6387: UDP-N-acetylmuramoyl-pentapeptide biosynthesis I (meso-diaminopimelate containing)|g__Alistipes.s__Alistipes_onderdonkii	4.66602	7.3329	7.59804	10.9328	1.05417	0.853374	0.996384
PWY-2942: L-lysine biosynthesis III|g__Parabacteroides.s__Parabacteroides_merdae	2.99796	3.15829	5.38953	4.64848	0.633725	0.85366	0.996384
UNINTEGRATED|g__Lachnospiraceae_noname.s__Lachnospiraceae_bacterium_5_1_63FAA	1392.06	1190.33	1310.29	1406.75	0.0559699	0.854419	0.996384
GLYCOLYSIS: glycolysis I (from glucose 6-phosphate)|g__Bacteroides.s__Bacteroides_ovatus	7.0096	8.07369	10.4789	9.94826	-1.3411	0.854531	0.996384
COA-PWY: coenzyme A biosynthesis I|g__Faecalibacterium.s__Faecalibacterium_prausnitzii	19.5668	21.9152	23.3578	19.4786	0.175571	0.854681	0.996384
ILEUSYN-PWY: L-isoleucine biosynthesis I (from threonine)|g__Eubacterium.s__Eubacterium_hallii	1.53652	2.14751	2.59329	3.17022	-0.109341	0.854727	0.996384
PWY-7196: superpathway of pyrimidine ribonucleosides salvage|unclassified	16.743	21.048	16.291	15.6106	-1.19518	0.854727	0.996384
PWY-5022: 4-aminobutanoate degradation V|unclassified	2.69025	2.34354	2.04879	1.96688	-0.0224425	0.861872	0.996384
PWY-841: superpathway of purine nucleotides de novo biosynthesis I|unclassified	20.3726	25.9382	19.4931	21.769	-0.786809	0.861872	0.996384
PWY-5686: UMP biosynthesis|g__Faecalibacterium.s__Faecalibacterium_prausnitzii	32.1293	34.0682	32.5499	30.8865	-0.98986	0.861945	0.996384
PENTOSE-P-PWY: pentose phosphate pathway	81.9703	83.9057	90.3666	85.3671	0.0760727	0.863156	0.996384
PWY-4981: L-proline biosynthesis II (from arginine)	58.1611	57.1076	60.3664	61.8683	-0.482534	0.863156	0.996384
PWY-7220: adenosine deoxyribonucleotides de novo biosynthesis II|unclassified	21.3697	21.4039	22.2636	20.5653	1.01848	0.863156	0.996384
PWY-7222: guanosine deoxyribonucleotides de novo biosynthesis II|unclassified	21.3697	21.4039	22.2636	20.5653	1.01848	0.863156	0.996384
PWY-7242: D-fructuronate degradation|unclassified	17.8616	19.3661	16.4197	17.6527	0.587632	0.863156	0.996384
PWY-6969: TCA cycle V (2-oxoglutarate:ferredoxin oxidoreductase)|unclassified	6.04494	6.82076	5.10617	5.03093	1.05915	0.863977	0.996384
PWY-7219: adenosine ribonucleotides de novo biosynthesis|g__Parabacteroides.s__Parabacteroides_distasonis	9.62353	6.58696	5.39909	3.79116	-0.378426	0.863977	0.996384
DTDPRHAMSYN-PWY: dTDP-L-rhamnose biosynthesis I|g__Bacteroides.s__Bacteroides_dorei	13.9379	16.208	14.879	15.1231	-0.650703	0.86469	0.996384
RHAMCAT-PWY: L-rhamnose degradation I|g__Bacteroides.s__Bacteroides_dorei	6.91489	10.2038	6.75007	7.48186	0.24147	0.86469	0.996384
ILEUSYN-PWY: L-isoleucine biosynthesis I (from threonine)|g__Ruminococcus.s__Ruminococcus_bromii	6.35594	9.02858	7.5103	8.83053	1.91202	0.865328	0.996384
PWY-6151: S-adenosyl-L-methionine cycle I|g__Blautia.s__Ruminococcus_obeum	1.07926	1.20422	1.74093	1.91816	-0.247649	0.865898	0.996384
GLUCARDEG-PWY: D-glucarate degradation I|g__Lachnospiraceae_noname.s__Lachnospiraceae_bacterium_7_1_58FAA	0.505456	0.573121	0.615375	0.492595	0.662624	0.866405	0.996384
PWY-6151: S-adenosyl-L-methionine cycle I|g__Roseburia.s__Roseburia_inulinivorans	1.58312	1.6712	1.04998	0.983926	-1.50556	0.866405	0.996384
PWY-5097: L-lysine biosynthesis VI|g__Roseburia.s__Roseburia_inulinivorans	1.66227	1.25163	1.0108	0.889828	0.210723	0.866853	0.996384
DTDPRHAMSYN-PWY: dTDP-L-rhamnose biosynthesis I|g__Collinsella.s__Collinsella_aerofaciens	7.6421	6.64291	7.2392	7.29781	-0.631783	0.868559	0.996384
PWY-1042: glycolysis IV (plant cytosol)|g__Lachnospiraceae_noname.s__Lachnospiraceae_bacterium_5_1_63FAA	3.37207	3.05609	3.35717	3.58422	-0.320017	0.868838	0.996384
PPGPPMET-PWY: ppGpp biosynthesis|unclassified	6.37313	8.06864	5.43782	6.37155	-1.11996	0.869016	0.996384
PWY66-400: glycolysis VI (metazoan)|g__Bacteroides.s__Bacteroides_ovatus	7.37695	8.63616	11.7362	11.1789	-1.47261	0.869016	0.996384
PWY-7388: octanoyl-[acyl-carrier protein] biosynthesis (mitochondria, yeast)|g__Bacteroides.s__Bacteroides_ovatus	6.57187	8.42741	11.7707	11.7135	-0.647506	0.869075	0.996384
PWY-7219: adenosine ribonucleotides de novo biosynthesis|g__Bacteroides.s__Bacteroides_uniformis	38.0254	32.6262	49.3763	47.9272	-0.0887195	0.869161	0.996384
COMPLETE-ARO-PWY: superpathway of aromatic amino acid biosynthesis|g__Eubacterium.s__Eubacterium_eligens	8.01252	5.73768	3.93894	4.47341	-0.406471	0.872744	0.996384
PWY-6121: 5-aminoimidazole ribonucleotide biosynthesis I|g__Blautia.s__Ruminococcus_obeum	0.974061	0.603322	1.07076	1.58565	-0.915003	0.872744	0.996384
VALSYN-PWY: L-valine biosynthesis|g__Alistipes.s__Alistipes_onderdonkii	5.69148	8.04848	8.92869	12.5853	0.537128	0.875624	0.996384
PWY-6387: UDP-N-acetylmuramoyl-pentapeptide biosynthesis I (meso-diaminopimelate containing)|g__Bacteroides.s__Bacteroides_uniformis	31.0129	26.979	39.9814	39.4388	-0.0354442	0.876354	0.996384
GLUCARDEG-PWY: D-glucarate degradation I	8.83173	13.4222	9.72646	10.0441	0.206181	0.877442	0.996384
GLYCOGENSYNTH-PWY: glycogen biosynthesis I (from ADP-D-Glucose)|unclassified	31.02	30.1984	28.873	30.1753	0.822637	0.877442	0.996384
POLYAMSYN-PWY: superpathway of polyamine biosynthesis I|unclassified	12.3355	11.8631	14.0534	13.5115	-0.0339974	0.877442	0.996384
PWY-5136: fatty acid &beta;-oxidation II (peroxisome)	13.4028	16.1816	11.8374	13.0798	0.420173	0.877442	0.996384
PWY-5690: TCA cycle II (plants and fungi)	35.5911	41.8379	33.382	36.5492	0.0390635	0.877442	0.996384
PWY-6737: starch degradation V	467.391	468.335	501.106	484.538	0.0688027	0.877442	0.996384
PWY-6936: seleno-amino acid biosynthesis|unclassified	25.0703	27.6396	24.7463	26.7308	0.452747	0.877442	0.996384
PWY-6953: dTDP-3-acetamido-3,6-dideoxy-&alpha;-D-galactose biosynthesis	1.59978	0.935259	1.95144	1.57001	-1.23839	0.878259	0.996384
THRESYN-PWY: superpathway of L-threonine biosynthesis|g__Bifidobacterium.s__Bifidobacterium_longum	2.50481	2.52889	6.25048	3.39934	-1.46847	0.878259	0.996384
PWY-6126: superpathway of adenosine nucleotides de novo biosynthesis II|g__Parabacteroides.s__Parabacteroides_distasonis	8.42072	6.07183	4.77316	3.07998	-0.274538	0.878967	0.996384
PWY-6163: chorismate biosynthesis from 3-dehydroquinate|g__Roseburia.s__Roseburia_inulinivorans	1.25815	1.26922	1.01607	0.753624	0.373091	0.878967	0.996384
PWY-5100: pyruvate fermentation to acetate and lactate II|g__Bifidobacterium.s__Bifidobacterium_longum	2.3454	2.46303	6.73086	3.18582	-0.520818	0.879603	0.996384
PWY-6609: adenine and adenosine salvage III|g__Bacteroides.s__Bacteroides_stercoris	39.2669	39.8565	17.202	23.6907	-0.870157	0.88068	0.996384
PWY-6609: adenine and adenosine salvage III|g__Lachnospiraceae_noname.s__Lachnospiraceae_bacterium_5_1_63FAA	1.06725	0.994652	0.916415	1.2727	-0.00573403	0.88068	0.996384
1CMET2-PWY: N10-formyl-tetrahydrofolate biosynthesis|g__Bacteroides.s__Bacteroides_thetaiotaomicron	2.36992	3.71744	3.06077	5.29189	-0.365022	0.881531	0.996384
COMPLETE-ARO-PWY: superpathway of aromatic amino acid biosynthesis|g__Eubacterium.s__Eubacterium_hallii	0.809419	0.99029	1.82738	2.08605	-1.14026	0.881531	0.996384
NONOXIPENT-PWY: pentose phosphate pathway (non-oxidative branch)|g__Eubacterium.s__Eubacterium_eligens	9.2226	6.48258	4.75744	5.08062	0.00720608	0.881884	0.996384
PWY-6386: UDP-N-acetylmuramoyl-pentapeptide biosynthesis II (lysine-containing)|g__Alistipes.s__Alistipes_onderdonkii	4.3063	6.48469	6.8412	10.2614	0.229792	0.882192	0.996384
PANTO-PWY: phosphopantothenate biosynthesis I|g__Parabacteroides.s__Parabacteroides_merdae	3.55224	3.56196	5.93852	5.50809	0.547818	0.882886	0.996384
SER-GLYSYN-PWY: superpathway of L-serine and glycine biosynthesis I|g__Parabacteroides.s__Parabacteroides_merdae	3.04699	2.73434	5.28905	4.90013	-0.34119	0.882886	0.996384
COA-PWY-1: coenzyme A biosynthesis II (mammalian)|g__Collinsella.s__Collinsella_aerofaciens	4.55763	3.95277	5.78382	5.2898	-1.3234	0.883052	0.996384
HISTSYN-PWY: L-histidine biosynthesis|g__Collinsella.s__Collinsella_aerofaciens	4.5983	4.34512	6.03388	5.47239	-1.46451	0.883052	0.996384
PEPTIDOGLYCANSYN-PWY: peptidoglycan biosynthesis I (meso-diaminopimelate containing)|g__Collinsella.s__Collinsella_aerofaciens	4.31513	3.89338	4.9425	4.62004	-0.361101	0.883052	0.996384
PWY-5005: biotin biosynthesis II	13.0939	14.766	16.5307	14.5999	-1.74566	0.883052	0.996384
PWY-1042: glycolysis IV (plant cytosol)|g__Bacteroides.s__Bacteroides_thetaiotaomicron	7.28284	9.01932	9.36222	13.1888	0.881868	0.88339	0.996384
PWY-7663: gondoate biosynthesis (anaerobic)|g__Bacteroides.s__Bacteroides_ovatus	5.34129	7.10701	10.3835	10.0508	-0.879061	0.883512	0.996384
PWY-5667: CDP-diacylglycerol biosynthesis I|g__Faecalibacterium.s__Faecalibacterium_prausnitzii	32.0828	33.2197	33.9105	31.3784	-0.239595	0.890803	0.996384
PWY0-1319: CDP-diacylglycerol biosynthesis II|g__Faecalibacterium.s__Faecalibacterium_prausnitzii	32.0828	33.2197	33.9105	31.3784	-0.239595	0.890803	0.996384
COA-PWY-1: coenzyme A biosynthesis II (mammalian)	410.949	405.139	413.518	399.819	0.0241702	0.891768	0.996384
PWY-3841: folate transformations II	356.289	358.388	347.224	340.753	0.0386918	0.891768	0.996384
PWY-5154: L-arginine biosynthesis III (via N-acetyl-L-citrulline)	266.985	271.36	256.28	259.652	0.0122955	0.891768	0.996384
PWY-6122: 5-aminoimidazole ribonucleotide biosynthesis II	421.142	415.777	413.402	404.418	0.0157366	0.891768	0.996384
PWY-6277: superpathway of 5-aminoimidazole ribonucleotide biosynthesis	421.142	415.777	413.402	404.418	0.0157366	0.891768	0.996384
PWY-6305: putrescine biosynthesis IV	46.8901	50.7051	46.3272	45.7613	0.485633	0.891768	0.996384
NONMEVIPP-PWY: methylerythritol phosphate pathway I|g__Dorea.s__Dorea_longicatena	1.69915	0.829804	1.01704	1.02925	-0.975165	0.89338	0.996384
PWY-7221: guanosine ribonucleotides de novo biosynthesis|g__Bifidobacterium.s__Bifidobacterium_longum	1.9389	2.32345	5.36369	3.01251	-0.570007	0.89338	0.996384
CALVIN-PWY: Calvin-Benson-Bassham cycle|g__Collinsella.s__Collinsella_aerofaciens	3.08163	3.06058	4.15396	3.85419	-0.0732104	0.894	0.996384
PEPTIDOGLYCANSYN-PWY: peptidoglycan biosynthesis I (meso-diaminopimelate containing)|g__Parabacteroides.s__Parabacteroides_distasonis	7.41137	4.99905	4.46635	2.73394	-0.734358	0.894	0.996384
PANTO-PWY: phosphopantothenate biosynthesis I|g__Bacteroides.s__Bacteroides_xylanisolvens	2.72137	2.56179	1.57523	1.46481	-1.92014	0.894558	0.996384
UNINTEGRATED|g__Blautia.s__Ruminococcus_gnavus	2870.22	1290.62	2706.22	2405.7	2.16779	0.895503	0.996384
ANAGLYCOLYSIS-PWY: glycolysis III (from glucose)|g__Alistipes.s__Alistipes_onderdonkii	4.97254	7.98685	8.52951	11.9728	1.31989	0.89625	0.996384
ANAGLYCOLYSIS-PWY: glycolysis III (from glucose)|g__Bacteroides.s__Bacteroides_stercoris	38.6004	39.9903	18.4768	23.5092	-0.39905	0.89625	0.996384
ARO-PWY: chorismate biosynthesis I|g__Eubacterium.s__Eubacterium_hallii	0.791078	0.945051	1.7445	1.97735	-1.12552	0.89625	0.996384
PWY-6700: queuosine biosynthesis|g__Eubacterium.s__Eubacterium_hallii	0.71918	1.02319	1.3697	2.02546	-0.298171	0.89625	0.996384
HISDEG-PWY: L-histidine degradation I|g__Bacteroides.s__Bacteroides_stercoris	35.4579	35.8868	15.8386	20.7278	-0.548017	0.897064	0.996384
PWY-5097: L-lysine biosynthesis VI|g__Lachnospiraceae_noname.s__Lachnospiraceae_bacterium_5_1_63FAA	1.02166	0.868267	0.895322	1.11158	-0.632093	0.897064	0.996384
PWY-7663: gondoate biosynthesis (anaerobic)|g__Lachnospiraceae_noname.s__Lachnospiraceae_bacterium_5_1_63FAA	1.41136	1.24327	1.1511	1.53909	-0.813752	0.897064	0.996384
TRPSYN-PWY: L-tryptophan biosynthesis|g__Parabacteroides.s__Parabacteroides_merdae	2.63974	2.73252	3.62231	3.93168	-0.26146	0.897439	0.996384
PWY-5484: glycolysis II (from fructose 6-phosphate)|g__Bacteroides.s__Bacteroides_ovatus	8.22694	8.83142	11.3569	11.0258	-1.04284	0.897881	0.996384
PWY-6121: 5-aminoimidazole ribonucleotide biosynthesis I|g__Faecalibacterium.s__Faecalibacterium_prausnitzii	25.7593	26.1271	25.9247	22.6196	-0.100176	0.89802	0.996384
PWY-7111: pyruvate fermentation to isobutanol (engineered)|g__Eubacterium.s__Eubacterium_hallii	1.44309	1.8872	2.38037	2.8074	0.170304	0.89802	0.996384
ANAGLYCOLYSIS-PWY: glycolysis III (from glucose)|g__Faecalibacterium.s__Faecalibacterium_prausnitzii	33.3487	35.8594	34.7064	32.0784	-0.583383	0.898055	0.996384
DTDPRHAMSYN-PWY: dTDP-L-rhamnose biosynthesis I|g__Bacteroides.s__Bacteroides_ovatus	14.46	15.8348	19.8127	20.6176	-0.385154	0.898055	0.996384
PWY-5367: petroselinate biosynthesis|unclassified	2.51399	2.56512	2.36211	2.85747	0.942482	0.898055	0.996384
PWY-6284: superpathway of unsaturated fatty acids biosynthesis (E. coli)|unclassified	6.07	6.3924	5.61867	6.71225	1.17533	0.898055	0.996384
PWY-6700: queuosine biosynthesis|g__Adlercreutzia.s__Adlercreutzia_equolifaciens	0.388465	0.545932	0.413834	0.416207	0.404804	0.898813	0.996384
COA-PWY: coenzyme A biosynthesis I|g__Dorea.s__Dorea_longicatena	1.07285	0.485806	0.705367	0.445426	-0.672314	0.901532	0.996384
P161-PWY: acetylene degradation|g__Bifidobacterium.s__Bifidobacterium_longum	2.19936	2.42151	6.20348	3.04116	-0.842931	0.902514	0.996384
PWY0-1297: superpathway of purine deoxyribonucleosides degradation|g__Roseburia.s__Roseburia_inulinivorans	1.62971	1.40979	0.997517	0.818107	-0.225997	0.902514	0.996384
PWY-7111: pyruvate fermentation to isobutanol (engineered)|g__Ruminococcus.s__Ruminococcus_bromii	6.12689	8.86655	7.50922	8.77576	1.97801	0.903297	0.996384
PWY-6385: peptidoglycan biosynthesis III (mycobacteria)|g__Alistipes.s__Alistipes_onderdonkii	4.24055	6.46782	6.86328	10.2061	-0.0606331	0.903911	0.996384
UNINTEGRATED|g__Eubacterium.s__Eubacterium_eligens	4318.82	3155.27	2444.38	2536.43	1.99548	0.90438	0.996384
PWY-7111: pyruvate fermentation to isobutanol (engineered)|g__Lachnospiraceae_noname.s__Lachnospiraceae_bacterium_5_1_63FAA	1.70497	1.17186	1.80711	1.81859	-0.672676	0.904975	0.996384
HISDEG-PWY: L-histidine degradation I|g__Bacteroides.s__Bacteroides_uniformis	29.0641	24.6003	38.456	36.9725	0.462111	0.905289	0.996384
PWY-2942: L-lysine biosynthesis III|g__Bacteroides.s__Bacteroides_uniformis	29.4371	25.6494	38.6722	37.9516	-0.107553	0.905289	0.996384
PWY-6122: 5-aminoimidazole ribonucleotide biosynthesis II|g__Bacteroides.s__Bacteroides_uniformis	30.363	26.447	38.6649	38.6316	0.377871	0.905289	0.996384
PWY-6277: superpathway of 5-aminoimidazole ribonucleotide biosynthesis|g__Bacteroides.s__Bacteroides_uniformis	30.363	26.447	38.6649	38.6316	0.377871	0.905289	0.996384
PWY-241: C4 photosynthetic carbon assimilation cycle, NADP-ME type	24.2018	24.6714	26.1636	25.6933	0.467762	0.906128	0.996384
PWY-5941: glycogen degradation II (eukaryotic)	80.2775	80.8465	79.098	81.4659	0.604278	0.906128	0.996384
PWY-6121: 5-aminoimidazole ribonucleotide biosynthesis I	396.853	392.755	397.783	392.525	0.00215126	0.906128	0.996384
PWY-6168: flavin biosynthesis III (fungi)	336.412	331.011	316.008	312.797	0.00141855	0.906128	0.996384
PWY-6317: galactose degradation I (Leloir pathway)	222.405	212.863	236.971	219.801	0.0146792	0.906128	0.996384
PWY-6387: UDP-N-acetylmuramoyl-pentapeptide biosynthesis I (meso-diaminopimelate containing)	435.765	428.022	423	410.03	0.0151049	0.906128	0.996384
RIBOSYN2-PWY: flavin biosynthesis I (bacteria and plants)	199.185	205.245	193.313	199.606	-0.0676517	0.906128	0.996384
PWY-5667: CDP-diacylglycerol biosynthesis I|g__Parabacteroides.s__Parabacteroides_distasonis	6.64149	4.40738	3.85151	2.39164	-0.305152	0.908539	0.996384
PWY-7219: adenosine ribonucleotides de novo biosynthesis|g__Clostridium.s__Clostridium_bolteae	0.443004	0.6472	1.11545	0.413398	-0.0209989	0.908539	0.996384
PWY0-1319: CDP-diacylglycerol biosynthesis II|g__Parabacteroides.s__Parabacteroides_distasonis	6.64149	4.40738	3.85151	2.39164	-0.305152	0.908539	0.996384
PWY-7229: superpathway of adenosine nucleotides de novo biosynthesis I|g__Parabacteroides.s__Parabacteroides_distasonis	8.81225	6.31256	5.04157	3.24314	-0.287072	0.909072	0.996384
PWY-6703: preQ0 biosynthesis|g__Blautia.s__Ruminococcus_torques	1.39145	1.5889	1.51604	1.51623	0.0293747	0.90998	0.996384
PWY-2942: L-lysine biosynthesis III|g__Bacteroides.s__Bacteroides_stercoris	34.8132	36.9673	16.8578	22.363	-0.232699	0.911005	0.996384
PWY-6125: superpathway of guanosine nucleotides de novo biosynthesis II|g__Bacteroides.s__Bacteroides_thetaiotaomicron	2.87881	3.69699	3.98266	6.26141	0.496003	0.91127	0.996384
PWY-6609: adenine and adenosine salvage III|g__Faecalibacterium.s__Faecalibacterium_prausnitzii	10.9539	12.385	7.49526	6.10482	1.61406	0.91127	0.996384
PWY-5188: tetrapyrrole biosynthesis I (from glutamate)|g__Lachnospiraceae_noname.s__Lachnospiraceae_bacterium_5_1_63FAA	0.971939	0.874781	0.811321	1.08709	-1.22192	0.911878	0.996384
PWY-5100: pyruvate fermentation to acetate and lactate II|g__Eubacterium.s__Eubacterium_hallii	1.04051	1.36544	1.68274	1.99392	-1.26931	0.912026	0.996384
PWY-5659: GDP-mannose biosynthesis|g__Parabacteroides.s__Parabacteroides_merdae	2.9253	2.77852	5.40395	4.67869	-0.121676	0.912026	0.996384
COA-PWY: coenzyme A biosynthesis I|g__Collinsella.s__Collinsella_aerofaciens	3.52696	3.18221	4.50382	4.16935	-1.57256	0.912254	0.996384
TRPSYN-PWY: L-tryptophan biosynthesis|g__Bacteroides.s__Bacteroides_ovatus	7.21524	7.55825	8.17661	8.81115	-0.346328	0.912406	0.996384
PWY-2942: L-lysine biosynthesis III|g__Bacteroides.s__Bacteroides_ovatus	8.30897	9.24986	9.90841	10.4371	-0.406845	0.912458	0.996384
PWY-6737: starch degradation V|g__Faecalibacterium.s__Faecalibacterium_prausnitzii	34.1136	36.6077	36.0594	34.6746	-0.280254	0.912544	0.996384
PWY-6151: S-adenosyl-L-methionine cycle I|g__Dorea.s__Dorea_longicatena	1.56244	0.834327	1.20841	0.980589	0.374734	0.915587	0.996384
PWY-6151: S-adenosyl-L-methionine cycle I|g__Bifidobacterium.s__Bifidobacterium_longum	2.7941	2.66117	7.57192	3.68057	-0.0774135	0.91662	0.996384
ANAGLYCOLYSIS-PWY: glycolysis III (from glucose)|g__Dorea.s__Dorea_longicatena	1.54383	0.911875	1.17425	0.979216	-0.00577406	0.917454	0.996384
PWY-5686: UMP biosynthesis|g__Eubacterium.s__Eubacterium_hallii	0.561139	0.709345	1.5645	1.54568	-0.311745	0.917454	0.996384
PWY-6527: stachyose degradation|g__Coprococcus.s__Coprococcus_comes	1.67436	1.21655	1.04973	1.22044	-0.896075	0.917454	0.996384
PWY-6737: starch degradation V|g__Roseburia.s__Roseburia_hominis	1.38201	2.30576	0.474651	0.53357	-1.06835	0.917454	0.996384
PANTO-PWY: phosphopantothenate biosynthesis I|g__Bacteroides.s__Bacteroides_stercoris	36.6289	38.3162	15.8545	21.4496	-0.525591	0.918118	0.996384
GOLPDLCAT-PWY: superpathway of glycerol degradation to 1,3-propanediol|g__Lachnospiraceae_noname.s__Lachnospiraceae_bacterium_5_1_63FAA	1.453	1.01312	1.3341	1.80785	-1.29662	0.918638	0.996384
PWY-7111: pyruvate fermentation to isobutanol (engineered)|g__Alistipes.s__Alistipes_onderdonkii	4.77526	7.22885	7.9847	10.7905	0.885939	0.919331	0.996384
PWY-5667: CDP-diacylglycerol biosynthesis I|g__Eubacterium.s__Eubacterium_rectale	25.764	15.1611	32.3574	20.6709	0.836164	0.91954	0.996384
PWY0-1319: CDP-diacylglycerol biosynthesis II|g__Eubacterium.s__Eubacterium_rectale	25.764	15.1611	32.3574	20.6709	0.836164	0.91954	0.996384
PANTO-PWY: phosphopantothenate biosynthesis I|g__Bacteroides.s__Bacteroides_uniformis	29.208	25.4686	37.346	37.1493	0.354222	0.919806	0.996384
PWY-7221: guanosine ribonucleotides de novo biosynthesis|g__Faecalibacterium.s__Faecalibacterium_prausnitzii	25.0718	24.8077	25.875	23.7386	-0.154497	0.919806	0.996384
SER-GLYSYN-PWY: superpathway of L-serine and glycine biosynthesis I|g__Bacteroides.s__Bacteroides_uniformis	27.1331	23.759	34.8955	35.5404	0.400635	0.919806	0.996384
REDCITCYC: TCA cycle VIII (helicobacter)	6.5582	9.49014	6.24134	6.37739	-0.513992	0.919821	0.996384
ARG+POLYAMINE-SYN: superpathway of arginine and polyamine biosynthesis	80.4186	84.1302	82.3959	78.3013	0.616025	0.920519	0.996384
POLYAMSYN-PWY: superpathway of polyamine biosynthesis I	48.7196	51.7717	49.4767	46.3589	0.591532	0.920519	0.996384
PWY-5097: L-lysine biosynthesis VI	399.602	388.649	395.9	378.845	0.0180008	0.920519	0.996384
PWY-6507: 4-deoxy-L-threo-hex-4-enopyranuronate degradation|unclassified	16.5621	17.8275	14.7497	15.9859	0.562917	0.920519	0.996384
PWY66-389: phytol degradation	23.8104	24.1574	24.7483	24.0595	0.157137	0.920519	0.996384
PWY66-422: D-galactose degradation V (Leloir pathway)	222.405	212.863	237.207	220.156	0.0142067	0.920519	0.996384
PWY-5100: pyruvate fermentation to acetate and lactate II|g__Anaerostipes.s__Anaerostipes_hadrus	1.05968	1.05185	1.32471	1.23683	0.99395	0.923731	0.996384
PWY-5104: L-isoleucine biosynthesis IV|g__Roseburia.s__Roseburia_hominis	1.02696	1.89587	0.369275	0.460359	-0.195646	0.924576	0.996384
ANAGLYCOLYSIS-PWY: glycolysis III (from glucose)|g__Lachnospiraceae_noname.s__Lachnospiraceae_bacterium_5_1_63FAA	1.71679	1.86886	1.92225	2.04245	0.951985	0.926206	0.996384
PWY-4981: L-proline biosynthesis II (from arginine)|g__Collinsella.s__Collinsella_aerofaciens	6.51043	5.36944	8.1371	7.10595	-0.868771	0.926643	0.996384
PWY-6122: 5-aminoimidazole ribonucleotide biosynthesis II|g__Lachnospiraceae_noname.s__Lachnospiraceae_bacterium_5_1_63FAA	1.53195	1.17527	1.33174	1.48135	-0.0926325	0.926747	0.996384
PWY-6124: inosine-5'-phosphate biosynthesis II|g__Bacteroides.s__Bacteroides_thetaiotaomicron	2.85925	3.38381	3.5985	4.97979	0.49561	0.926747	0.996384
PWY-6277: superpathway of 5-aminoimidazole ribonucleotide biosynthesis|g__Lachnospiraceae_noname.s__Lachnospiraceae_bacterium_5_1_63FAA	1.53195	1.17527	1.33174	1.48135	-0.0926325	0.926747	0.996384
PWY-6387: UDP-N-acetylmuramoyl-pentapeptide biosynthesis I (meso-diaminopimelate containing)|g__Lachnospiraceae_noname.s__Lachnospiraceae_bacterium_5_1_63FAA	1.56836	1.33611	1.31115	1.82489	-0.381218	0.926747	0.996384
RHAMCAT-PWY: L-rhamnose degradation I|g__Bacteroides.s__Bacteroides_thetaiotaomicron	3.61174	5.01661	4.8308	6.7797	-0.0948276	0.926747	0.996384
VALSYN-PWY: L-valine biosynthesis|g__Bacteroides.s__Bacteroides_thetaiotaomicron	3.34606	4.74911	4.33411	6.47645	0.0729318	0.926747	0.996384
GLUDEG-I-PWY: GABA shunt	3.51279	6.80391	1.75863	2.1158	-0.0171332	0.926904	0.996384
POLYAMINSYN3-PWY: superpathway of polyamine biosynthesis II	14.1518	18.7057	9.50994	11.324	-1.23816	0.927084	0.996384
BRANCHED-CHAIN-AA-SYN-PWY: superpathway of branched amino acid biosynthesis|g__Roseburia.s__Roseburia_hominis	1.13507	1.92349	0.425992	0.520962	0.128977	0.932422	0.996384
PWY-5103: L-isoleucine biosynthesis III|g__Roseburia.s__Roseburia_hominis	1.00867	1.76197	0.388971	0.491405	0.136032	0.932422	0.996384
PWY-6163: chorismate biosynthesis from 3-dehydroquinate|g__Eubacterium.s__Eubacterium_eligens	8.10207	6.15463	3.92294	4.74996	-0.742332	0.932422	0.996384
PWY-6317: galactose degradation I (Leloir pathway)|g__Eubacterium.s__Eubacterium_hallii	0.840847	0.939616	1.45145	1.64196	-0.0172505	0.932966	0.996384
PWY-7219: adenosine ribonucleotides de novo biosynthesis|g__Lachnospiraceae_noname.s__Lachnospiraceae_bacterium_7_1_58FAA	0.985982	0.644657	1.35835	1.14984	-0.0130469	0.932966	0.996384
PWY66-422: D-galactose degradation V (Leloir pathway)|g__Eubacterium.s__Eubacterium_hallii	0.840847	0.939616	1.45145	1.64196	-0.0172505	0.932966	0.996384
PWY-6123: inosine-5'-phosphate biosynthesis I|g__Bacteroides.s__Bacteroides_thetaiotaomicron	2.85601	3.5037	3.63501	5.20765	0.770811	0.933961	0.996384
PWY-6700: queuosine biosynthesis|g__Bacteroides.s__Bacteroides_ovatus	9.06687	9.55005	9.31297	10.611	-0.499437	0.934246	0.996384
DENOVOPURINE2-PWY: superpathway of purine nucleotides de novo biosynthesis II|unclassified	19.8883	25.0447	18.5614	20.8992	-0.800699	0.934315	0.996384
PWY-1042: glycolysis IV (plant cytosol)|g__Blautia.s__Ruminococcus_obeum	5.86229	5.41568	8.09414	7.96801	0.918437	0.93435	0.996384
CENTFERM-PWY: pyruvate fermentation to butanoate	31.8475	34.1237	31.0209	32.3705	-0.0203555	0.934935	0.996384
PEPTIDOGLYCANSYN-PWY: peptidoglycan biosynthesis I (meso-diaminopimelate containing)	420.399	415.401	408.214	397.491	0.018393	0.934935	0.996384
PWY-621: sucrose degradation III (sucrose invertase)|unclassified	11.0193	12.1483	10.53	11.6407	0.37154	0.934935	0.996384
PWY-6545: pyrimidine deoxyribonucleotides de novo biosynthesis III	105.393	116.652	97.5969	103.827	-0.570533	0.934935	0.996384
PWY-5138: unsaturated, even numbered fatty acid &beta;-oxidation	1.65636	4.89483	0.614607	0.955303	-0.0862274	0.938951	0.996384
PWY0-1296: purine ribonucleosides degradation|g__Anaerostipes.s__Anaerostipes_hadrus	0.581728	0.469423	0.992101	0.917111	-0.243261	0.938951	0.996384
COA-PWY-1: coenzyme A biosynthesis II (mammalian)|g__Alistipes.s__Alistipes_onderdonkii	4.20524	6.02126	6.53754	8.73851	0.4325	0.940172	0.996384
PWY-1042: glycolysis IV (plant cytosol)|g__Eubacterium.s__Eubacterium_eligens	11.8066	9.09318	6.86726	6.99131	-0.0477732	0.940779	0.996384
PWY-6121: 5-aminoimidazole ribonucleotide biosynthesis I|g__Eubacterium.s__Eubacterium_eligens	9.30457	5.88704	4.66262	5.25842	0.330354	0.940934	0.996384
1CMET2-PWY: N10-formyl-tetrahydrofolate biosynthesis|g__Parabacteroides.s__Parabacteroides_merdae	2.81492	2.86351	5.13396	4.89845	0.601107	0.941069	0.996384
P461-PWY: hexitol fermentation to lactate, formate, ethanol and acetate|g__Eubacterium.s__Eubacterium_hallii	1.88406	1.7953	3.23792	3.40466	-1.74244	0.941069	0.996384
DTDPRHAMSYN-PWY: dTDP-L-rhamnose biosynthesis I|g__Alistipes.s__Alistipes_onderdonkii	10.2509	14.6511	17.8948	23.5735	0.151651	0.941284	0.996384
PWY-7111: pyruvate fermentation to isobutanol (engineered)|g__Parabacteroides.s__Parabacteroides_merdae	3.20118	3.33787	5.19293	5.2948	-0.206961	0.941284	0.996384
PWY-1042: glycolysis IV (plant cytosol)|g__Bacteroides.s__Bacteroides_stercoris	52.6538	55.35	28.2979	36.3561	0.0372976	0.941493	0.996384
PWY-7211: superpathway of pyrimidine deoxyribonucleotides de novo biosynthesis|unclassified	10.8313	13.0413	10.0191	10.1343	-0.82187	0.941493	0.996384
PWY-7221: guanosine ribonucleotides de novo biosynthesis|g__Collinsella.s__Collinsella_aerofaciens	5.48093	5.17638	6.42843	6.13357	-0.816059	0.941493	0.996384
PWY-1042: glycolysis IV (plant cytosol)|g__Lachnospiraceae_noname.s__Lachnospiraceae_bacterium_7_1_58FAA	1.66642	1.76091	2.24063	2.53317	0.516222	0.941538	0.996384
UNINTEGRATED|g__Bacteroides.s__Bacteroides_thetaiotaomicron	4832.14	6049.32	6005.37	8419.19	0.759177	0.941538	0.996384
PWY-6386: UDP-N-acetylmuramoyl-pentapeptide biosynthesis II (lysine-containing)|g__Faecalibacterium.s__Faecalibacterium_prausnitzii	24.8279	26.6494	26.8243	24.482	-0.814863	0.9416	0.996384
PWY-6317: galactose degradation I (Leloir pathway)|g__Faecalibacterium.s__Faecalibacterium_prausnitzii	31.3716	33.4621	32.6928	29.6511	-0.528651	0.941618	0.996384
PWY-6749: CMP-legionaminate biosynthesis I	4.58051	6.52932	6.88173	8.47659	0.0194978	0.941618	0.996384
PWY66-422: D-galactose degradation V (Leloir pathway)|g__Faecalibacterium.s__Faecalibacterium_prausnitzii	31.3716	33.4621	32.6928	29.6511	-0.528651	0.941618	0.996384
PWY-5188: tetrapyrrole biosynthesis I (from glutamate)|g__Ruminococcus.s__Ruminococcus_bromii	3.67353	5.04576	4.19658	5.1135	1.20519	0.946883	0.996384
PWY-5686: UMP biosynthesis|g__Bacteroides.s__Bacteroides_thetaiotaomicron	2.60103	3.54913	3.70697	5.5527	0.438439	0.94817	0.996384
PWY-6163: chorismate biosynthesis from 3-dehydroquinate|g__Lachnospiraceae_noname.s__Lachnospiraceae_bacterium_5_1_63FAA	1.17379	0.859983	1.04491	1.22066	0.554906	0.94817	0.996384
PWY-7111: pyruvate fermentation to isobutanol (engineered)|g__Eubacterium.s__Eubacterium_eligens	10.7735	7.58201	5.85289	6.23689	0.821543	0.948424	0.996384
FOLSYN-PWY: superpathway of tetrahydrofolate biosynthesis and salvage	5.87895	9.84396	6.76489	5.46854	-0.877309	0.948613	0.996384
PWY-6612: superpathway of tetrahydrofolate biosynthesis	4.04562	7.37047	4.59844	3.70749	-0.802842	0.948613	0.996384
PWY-6737: starch degradation V|g__Collinsella.s__Collinsella_aerofaciens	5.80122	5.79828	7.5743	7.76976	-1.08191	0.948835	0.996384
SER-GLYSYN-PWY: superpathway of L-serine and glycine biosynthesis I|g__Blautia.s__Ruminococcus_torques	2.40427	2.46972	2.12353	1.66927	-0.618794	0.948835	0.996384
PWY-5097: L-lysine biosynthesis VI|g__Bacteroides.s__Bacteroides_uniformis	27.6014	24.0951	36.2608	35.4957	-0.0940027	0.948916	0.996384
PWY-5695: urate biosynthesis/inosine 5'-phosphate degradation|g__Bacteroides.s__Bacteroides_uniformis	33.4793	28.0045	42.9624	41.0771	0.373825	0.948916	0.996384
PWY-6385: peptidoglycan biosynthesis III (mycobacteria)|g__Bacteroides.s__Bacteroides_uniformis	29.6533	25.432	38.0436	37.6552	0.398058	0.948916	0.996384
PWY-5177: glutaryl-CoA degradation|g__Faecalibacterium.s__Faecalibacterium_prausnitzii	32.5515	34.5922	34.9096	32.5868	-0.0671036	0.948926	0.996384
PWY-6122: 5-aminoimidazole ribonucleotide biosynthesis II|g__Faecalibacterium.s__Faecalibacterium_prausnitzii	26.1582	27.2016	26.3966	24.228	-0.0868314	0.948926	0.996384
PWY-6277: superpathway of 5-aminoimidazole ribonucleotide biosynthesis|g__Faecalibacterium.s__Faecalibacterium_prausnitzii	26.1582	27.2016	26.3966	24.228	-0.0868314	0.948926	0.996384
PWY-7111: pyruvate fermentation to isobutanol (engineered)|g__Faecalibacterium.s__Faecalibacterium_prausnitzii	35.6958	38.64	36.7148	36.406	0.571172	0.948926	0.996384
P185-PWY: formaldehyde assimilation III (dihydroxyacetone cycle)	41.2974	41.2881	50.1977	47.7892	0.694675	0.949372	0.996384
PWY-6527: stachyose degradation	187.369	179.997	199.277	182.534	0.0382089	0.949372	0.996384
PWY-6590: superpathway of Clostridium acetobutylicum acidogenic fermentation	39.3383	41.9841	38.4642	39.9694	-0.0195649	0.949372	0.996384
PWY-7007: methyl ketone biosynthesis	20.7204	20.6431	19.683	20.3313	0.479317	0.949372	0.996384
PWY-7111: pyruvate fermentation to isobutanol (engineered)	459.504	458.525	453.107	441.372	0.0257706	0.949372	0.996384
PWY-7242: D-fructuronate degradation	27.7823	34.0826	23.2153	25.8276	0.715317	0.949372	0.996384
PWY-7323: superpathway of GDP-mannose-derived O-antigen building blocks biosynthesis|unclassified	14.1086	14.753	13.2696	13.7612	0.0288327	0.949372	0.996384
PWY0-1298: superpathway of pyrimidine deoxyribonucleosides degradation	52.9717	50.3196	48.4712	46.7354	0.554307	0.949372	0.996384
PWY-7111: pyruvate fermentation to isobutanol (engineered)|g__Bacteroides.s__Bacteroides_dorei	6.68502	9.41729	6.37964	7.46922	-0.237791	0.954703	0.996384
BRANCHED-CHAIN-AA-SYN-PWY: superpathway of branched amino acid biosynthesis|g__Ruminococcus.s__Ruminococcus_bromii	5.18632	7.78624	6.49676	7.84512	1.87768	0.954918	0.996384
PWY-5103: L-isoleucine biosynthesis III|g__Ruminococcus.s__Ruminococcus_bromii	5.01166	7.57002	6.33505	7.68341	1.85617	0.954918	0.996384
SER-GLYSYN-PWY: superpathway of L-serine and glycine biosynthesis I|g__Bacteroides.s__Bacteroides_stercoris	35.0994	37.6886	15.7292	20.9611	-0.153791	0.955111	0.996384
DTDPRHAMSYN-PWY: dTDP-L-rhamnose biosynthesis I|g__Eubacterium.s__Eubacterium_eligens	9.76755	7.33911	5.06656	5.14675	1.06125	0.955683	0.996384
PWY-6122: 5-aminoimidazole ribonucleotide biosynthesis II|g__Blautia.s__Ruminococcus_obeum	1.00227	0.682299	1.25265	1.58059	-0.303081	0.955683	0.996384
PWY-6277: superpathway of 5-aminoimidazole ribonucleotide biosynthesis|g__Blautia.s__Ruminococcus_obeum	1.00227	0.682299	1.25265	1.58059	-0.303081	0.955683	0.996384
PWY0-1296: purine ribonucleosides degradation|g__Dorea.s__Dorea_longicatena	2.48248	1.62112	2.69923	1.85109	0.1235	0.955683	0.996384
PYRIDOXSYN-PWY: pyridoxal 5'-phosphate biosynthesis I|g__Bacteroides.s__Bacteroides_thetaiotaomicron	2.55943	3.69866	3.15699	5.40103	-0.453571	0.955683	0.996384
FASYN-INITIAL-PWY: superpathway of fatty acid biosynthesis initiation (E. coli)|g__Bacteroides.s__Bacteroides_thetaiotaomicron	3.42789	4.33314	4.56237	6.74827	0.172379	0.955871	0.996384
SER-GLYSYN-PWY: superpathway of L-serine and glycine biosynthesis I|g__Alistipes.s__Alistipes_onderdonkii	5.35869	7.24933	7.65724	11.0298	1.42031	0.955871	0.996384
ILEUSYN-PWY: L-isoleucine biosynthesis I (from threonine)|g__Bacteroides.s__Bacteroides_thetaiotaomicron	3.32839	4.73774	4.33411	6.45649	0.444324	0.956008	0.996384
ANAGLYCOLYSIS-PWY: glycolysis III (from glucose)|g__Bacteroides.s__Bacteroides_ovatus	9.26361	10.7538	12.5794	12.4549	-1.47107	0.956183	0.996384
DTDPRHAMSYN-PWY: dTDP-L-rhamnose biosynthesis I|g__Bacteroides.s__Bacteroides_uniformis	33.2284	28.4361	43.7665	42.9644	-0.0921615	0.956212	0.996384
P23-PWY: reductive TCA cycle I	10.2225	11.5761	7.61726	8.3024	0.365772	0.956212	0.996384
PWY-7219: adenosine ribonucleotides de novo biosynthesis|g__Collinsella.s__Collinsella_aerofaciens	7.79453	7.43876	9.5587	9.38553	-1.25149	0.963442	0.996384
PWY-2941: L-lysine biosynthesis II|unclassified	13.0778	11.6441	11.7173	9.95173	-1.27199	0.963499	0.996384
PWY-6151: S-adenosyl-L-methionine cycle I|g__Bacteroides.s__Bacteroides_uniformis	32.7702	27.572	41.6004	40.2618	0.322397	0.963499	0.996384
BRANCHED-CHAIN-AA-SYN-PWY: superpathway of branched amino acid biosynthesis|g__Faecalibacterium.s__Faecalibacterium_prausnitzii	36.6906	40.3632	37.9363	37.4622	0.618503	0.963506	0.996384
ILEUSYN-PWY: L-isoleucine biosynthesis I (from threonine)|g__Faecalibacterium.s__Faecalibacterium_prausnitzii	39.6357	44.1204	41.4976	40.6199	0.77065	0.963506	0.996384
VALSYN-PWY: L-valine biosynthesis|g__Faecalibacterium.s__Faecalibacterium_prausnitzii	39.6357	44.1204	41.4976	40.6199	0.77065	0.963506	0.996384
GALACT-GLUCUROCAT-PWY: superpathway of hexuronide and hexuronate degradation|unclassified	16.5857	18.285	15.1917	16.7307	0.967813	0.963825	0.996384
GLYCOGENSYNTH-PWY: glycogen biosynthesis I (from ADP-D-Glucose)	61.557	61.6558	59.7922	62.6209	0.534446	0.963825	0.996384
PWY-5104: L-isoleucine biosynthesis IV|unclassified	26.7106	31.8453	28.4542	33.6255	0.0102426	0.963825	0.996384
PWY-6123: inosine-5'-phosphate biosynthesis I	150.155	158.618	159.819	169.458	-0.0185035	0.963825	0.996384
PENTOSE-P-PWY: pentose phosphate pathway|unclassified	2.49244	2.45519	3.53992	3.91531	0.0559814	0.969453	0.996384
PWY-5667: CDP-diacylglycerol biosynthesis I|g__Bifidobacterium.s__Bifidobacterium_longum	2.28666	2.77254	7.03625	3.47645	-0.00181513	0.969453	0.996384
PWY0-1319: CDP-diacylglycerol biosynthesis II|g__Bifidobacterium.s__Bifidobacterium_longum	2.28666	2.77254	7.03625	3.47645	-0.00181513	0.969453	0.996384
PWY-7254: TCA cycle VII (acetate-producers)|unclassified	1.58447	1.37167	1.96295	1.84974	-0.805611	0.969793	0.996384
PWY-5695: urate biosynthesis/inosine 5'-phosphate degradation|g__Bacteroides.s__Bacteroides_stercoris	39.4124	39.5261	17.5914	22.6068	-0.772266	0.970065	0.996384
PWY-6703: preQ0 biosynthesis|g__Bacteroides.s__Bacteroides_stercoris	49.6053	49.8148	20.082	26.0722	-0.523026	0.970065	0.996384
UNINTEGRATED|g__Eubacterium.s__Eubacterium_ramulus	1224.8	1407.24	985.669	984.819	-0.677315	0.970065	0.996384
PWY66-400: glycolysis VI (metazoan)|g__Alistipes.s__Alistipes_onderdonkii	5.36515	8.79855	9.18852	12.7835	1.29216	0.97028	0.996384
P161-PWY: acetylene degradation|g__Eubacterium.s__Eubacterium_eligens	8.01991	6.45972	4.65095	4.85929	-0.231183	0.970447	0.996384
PWY-7219: adenosine ribonucleotides de novo biosynthesis|g__Alistipes.s__Alistipes_onderdonkii	4.55456	6.84108	7.25926	10.7445	0.321001	0.970447	0.996384
PWY0-1296: purine ribonucleosides degradation|g__Lachnospiraceae_noname.s__Lachnospiraceae_bacterium_5_1_63FAA	1.07014	1.05239	0.822532	1.06568	0.539647	0.970447	0.996384
PWY-5973: cis-vaccenate biosynthesis|g__Lachnospiraceae_noname.s__Lachnospiraceae_bacterium_5_1_63FAA	1.42055	1.18419	1.05136	1.46933	-0.781515	0.970514	0.996384
BRANCHED-CHAIN-AA-SYN-PWY: superpathway of branched amino acid biosynthesis|g__Parabacteroides.s__Parabacteroides_merdae	3.50606	3.48493	5.34081	5.24194	-0.592403	0.970622	0.996384
GALACTARDEG-PWY: D-galactarate degradation I|unclassified	1.67685	2.03533	1.5992	1.93	0.041401	0.970622	0.996384
GLUCARGALACTSUPER-PWY: superpathway of D-glucarate and D-galactarate degradation|unclassified	1.67685	2.03533	1.5992	1.93	0.041401	0.970622	0.996384
UNINTEGRATED|g__Adlercreutzia.s__Adlercreutzia_equolifaciens	283.69	404.863	339.711	317.212	0.410959	0.970622	0.996384
P461-PWY: hexitol fermentation to lactate, formate, ethanol and acetate|g__Lachnospiraceae_noname.s__Lachnospiraceae_bacterium_5_1_63FAA	3.05541	2.72351	3.05048	3.22574	-0.583985	0.970699	0.996384
PWY-5971: palmitate biosynthesis II (bacteria and plants)|unclassified	18.2016	21.3311	14.0267	16.5197	1.57463	0.970767	0.996384
PWY-5695: urate biosynthesis/inosine 5'-phosphate degradation|g__Faecalibacterium.s__Faecalibacterium_prausnitzii	22.142	24.1957	25.4985	25.3147	-1.37676	0.97078	0.996384
PWY-6387: UDP-N-acetylmuramoyl-pentapeptide biosynthesis I (meso-diaminopimelate containing)|g__Faecalibacterium.s__Faecalibacterium_prausnitzii	26.9329	29.2616	28.3966	26.4431	-0.861229	0.97078	0.996384
ARO-PWY: chorismate biosynthesis I|g__Eubacterium.s__Eubacterium_eligens	7.79224	5.5663	3.74169	4.33797	-0.429936	0.97745	0.996384
PWY-6122: 5-aminoimidazole ribonucleotide biosynthesis II|g__Blautia.s__Ruminococcus_torques	1.73976	1.44761	1.26831	1.56531	1.02476	0.977884	0.996384
PWY-6277: superpathway of 5-aminoimidazole ribonucleotide biosynthesis|g__Blautia.s__Ruminococcus_torques	1.73976	1.44761	1.26831	1.56531	1.02476	0.977884	0.996384
PWY-6700: queuosine biosynthesis|g__Lachnospiraceae_noname.s__Lachnospiraceae_bacterium_5_1_63FAA	1.08338	1.07284	0.923477	1.09367	-0.183699	0.977965	0.996384
LACTOSECAT-PWY: lactose and galactose degradation I|g__Collinsella.s__Collinsella_aerofaciens	11.1457	10.0724	13.1633	12.7863	-0.527069	0.97806	0.996384
PWY-6124: inosine-5'-phosphate biosynthesis II|g__Bacteroides.s__Bacteroides_ovatus	4.36813	5.94126	8.23365	7.26367	-0.749782	0.978083	0.996384
PWY-6151: S-adenosyl-L-methionine cycle I|g__Faecalibacterium.s__Faecalibacterium_prausnitzii	24.9634	25.6966	24.2592	22.7272	0.361131	0.978083	0.996384
PWY-6609: adenine and adenosine salvage III|g__Bacteroides.s__Bacteroides_uniformis	32.4524	26.5349	41.3537	39.2034	0.403985	0.978095	0.996384
PWY-5103: L-isoleucine biosynthesis III|g__Faecalibacterium.s__Faecalibacterium_prausnitzii	35.6349	39.0405	36.73	36.4034	0.565699	0.978099	0.996384
PWY-7254: TCA cycle VII (acetate-producers)	11.8236	13.8558	12.1072	13.1958	0.144153	0.978099	0.996384
LACTOSECAT-PWY: lactose and galactose degradation I	43.3301	38.693	43.6757	45.7408	-0.242256	0.978291	0.996384
PANTO-PWY: phosphopantothenate biosynthesis I	322.872	321.398	316.656	310.544	0.0362507	0.978291	0.996384
PWY-5177: glutaryl-CoA degradation	65.7614	69.1472	69.545	68.4906	0.0513685	0.978291	0.996384
PWY-1042: glycolysis IV (plant cytosol)|g__Anaerostipes.s__Anaerostipes_hadrus	1.88994	1.5148	2.54905	2.73301	0.564181	0.984724	0.996384
PWY-5667: CDP-diacylglycerol biosynthesis I|g__Dorea.s__Dorea_formicigenerans	0.282191	0.445047	0.549948	0.572523	-0.892183	0.984894	0.996384
PWY0-1319: CDP-diacylglycerol biosynthesis II|g__Dorea.s__Dorea_formicigenerans	0.282191	0.445047	0.549948	0.572523	-0.892183	0.984894	0.996384
PWY-5695: urate biosynthesis/inosine 5'-phosphate degradation|g__Roseburia.s__Roseburia_inulinivorans	1.51421	1.28946	0.944728	1.11954	-0.307841	0.98503	0.996384
PYRIDOXSYN-PWY: pyridoxal 5'-phosphate biosynthesis I|g__Bacteroides.s__Bacteroides_stercoris	38.9014	40.2343	18.0347	22.3894	-0.709711	0.985087	0.996384
PWY-5097: L-lysine biosynthesis VI|g__Eubacterium.s__Eubacterium_eligens	8.03779	5.93846	4.18784	4.64257	0.116534	0.985221	0.996384
PWY-6121: 5-aminoimidazole ribonucleotide biosynthesis I|g__Blautia.s__Ruminococcus_torques	1.72011	1.52142	1.19902	1.43794	1.49175	0.985221	0.996384
PWY-5103: L-isoleucine biosynthesis III|g__Parabacteroides.s__Parabacteroides_merdae	3.26236	3.29458	5.10187	5.00467	-0.567151	0.985309	0.996384
PANTO-PWY: phosphopantothenate biosynthesis I|g__Lachnospiraceae_noname.s__Lachnospiraceae_bacterium_5_1_63FAA	1.95951	1.84332	1.97941	2.33867	0.14987	0.985361	0.996384
PWY-5097: L-lysine biosynthesis VI|g__Bacteroides.s__Bacteroides_ovatus	8.01957	8.5804	9.64146	9.87347	-0.876989	0.985388	0.996384
PWY-6285: superpathway of fatty acids biosynthesis (E. coli)	31.991	32.5676	28.5018	29.5836	0.911177	0.985397	0.996384
PWY-7219: adenosine ribonucleotides de novo biosynthesis|g__Eubacterium.s__Eubacterium_siraeum	6.56963	6.83807	7.28215	3.67572	-0.293587	0.992196	0.996384
PEPTIDOGLYCANSYN-PWY: peptidoglycan biosynthesis I (meso-diaminopimelate containing)|g__Blautia.s__Ruminococcus_obeum	1.1003	0.634005	1.3321	2.03147	-0.811325	0.992312	0.996384
PWY-6385: peptidoglycan biosynthesis III (mycobacteria)|g__Blautia.s__Ruminococcus_obeum	1.11112	0.639947	1.35038	2.08558	-0.839093	0.992312	0.996384
ARO-PWY: chorismate biosynthesis I|g__Lachnospiraceae_noname.s__Lachnospiraceae_bacterium_5_1_63FAA	1.1392	0.82775	1.06608	1.25992	0.594185	0.992591	0.996384
COMPLETE-ARO-PWY: superpathway of aromatic amino acid biosynthesis|g__Lachnospiraceae_noname.s__Lachnospiraceae_bacterium_5_1_63FAA	1.16907	0.858407	1.11101	1.30348	0.608561	0.992591	0.996384
GLYOXYLATE-BYPASS: glyoxylate cycle	1.95375	7.22806	1.20166	1.83281	-0.135381	0.992591	0.996384
COA-PWY-1: coenzyme A biosynthesis II (mammalian)|g__Bacteroides.s__Bacteroides_uniformis	30.1143	25.9774	38.2357	37.5302	0.758723	0.992697	0.996384
PWY-6703: preQ0 biosynthesis|g__Bacteroides.s__Bacteroides_uniformis	30.2053	27.1887	37.753	38.4301	0.753838	0.992697	0.996384
ARGSYNBSUB-PWY: L-arginine biosynthesis II (acetyl cycle)	131.202	143.414	138.068	148.091	0.626032	0.992763	0.996384
FAO-PWY: fatty acid &beta;-oxidation I	15.2652	18.8161	13.579	15.043	0.477214	0.992763	0.996384
PWY-5686: UMP biosynthesis	393.287	391.473	398.198	389.978	0.0302403	0.992763	0.996384
PWY-6124: inosine-5'-phosphate biosynthesis II	134.857	143.183	145.11	154.252	-0.0177063	0.992763	0.996384
PWY-6386: UDP-N-acetylmuramoyl-pentapeptide biosynthesis II (lysine-containing)	443.283	436.208	434.558	420.819	0.0178901	0.992763	0.996384
PWY-6606: guanosine nucleotides degradation II|unclassified	7.03872	6.53761	7.38153	6.88543	0.489283	0.992763	0.996384
COA-PWY: coenzyme A biosynthesis I	183.327	177.324	198.016	182.315	0.0412455	1	1
PANTO-PWY: phosphopantothenate biosynthesis I|g__Alistipes.s__Alistipes_onderdonkii	4.97508	7.36669	7.21047	10.3758	0.727033	1	1
PWY-6124: inosine-5'-phosphate biosynthesis II|g__Lachnospiraceae_noname.s__Lachnospiraceae_bacterium_5_1_63FAA	1.14168	1.07552	0.598737	1.0396	0.902016	1	1
PWY-6700: queuosine biosynthesis|unclassified	56.4019	56.8189	56.6269	57.5181	-0.0446642	1	1
PWY-7221: guanosine ribonucleotides de novo biosynthesis|g__Ruminococcus.s__Ruminococcus_bromii	3.95681	5.22492	4.63955	6.23799	1.5926	1	1
PWY-7384: anaerobic energy metabolism (invertebrates, mitochondrial)	18.8476	19.8088	18.357	18.7214	0.080686	1	1

## Sheet: Gene Families p < 0.05
Gene_Family	Cranberry.wk0	Cranberry.wk24	Placebo.wk0	Placebo.wk24	Cranberry.vs.placebo	p	p.adjusted
UniRef50_G2T0J9|g__Roseburia.s__Roseburia_inulinivorans	0.96324	0.341432	0.466578	2.08116	NA	2.22986e-05	0.997315
UniRef50_R5FLR1: Diaminopimelate decarboxylase	0.81259	1.0504	0.754679	0.494542	NA	4.51048e-05	0.997315
UniRef50_R5FLR1: Diaminopimelate decarboxylase|unclassified	0.81259	1.0504	0.754679	0.494542	NA	4.51048e-05	0.997315
UniRef50_T0E1K8: AcrB/AcrD/AcrF family protein	0.634189	0.910725	1.63849	0.746353	NA	5.23436e-05	0.997315
UniRef50_T0E1K8: AcrB/AcrD/AcrF family protein|unclassified	0.634189	0.910725	1.63849	0.746353	NA	5.23436e-05	0.997315
UniRef50_V2Y4F8: Phosphoribosyl-AMP cyclohydrolase	0.158621	0.0681131	0.0414576	0.242461	NA	5.87267e-05	0.997315
UniRef50_V2Y4F8: Phosphoribosyl-AMP cyclohydrolase|unclassified	0.158621	0.0681131	0.0414576	0.242461	NA	5.87267e-05	0.997315
UniRef50_R6J0Z1: DNA-binding response regulator	1.89688	2.8406	2.29432	2.1252	NA	7.18642e-05	0.997315
UniRef50_R5EVB8	0.387379	0.509899	0.870808	0.287028	-Inf	8.26543e-05	0.997315
UniRef50_E5X0M4: Carboxynorspermidine decarboxylase|unclassified	0.28817	0.426507	0.454272	0.314481	NA	8.33226e-05	0.997315
UniRef50_A8S670|unclassified	1.31182	1.87477	1.59009	1.20993	NA	0.000111365	0.997315
UniRef50_R6JHR6: Ferritin-like protein|g__Bacteroides.s__Bacteroides_caccae	1.32959	1.9811	1.8825	1.29807	NA	0.00011521	0.997315
UniRef50_K1T2Z0	0.36041	0.246294	0.1287	0.298633	NA	0.000116487	0.997315
UniRef50_K1T2Z0|unclassified	0.36041	0.246294	0.1287	0.298633	NA	0.000116487	0.997315
UniRef50_D4IQ51: RNA polymerase sigma factor, sigma-70 family	0.908606	1.27631	1.722	1.14368	NA	0.000124307	0.997315
UniRef50_D4KLU1: Predicted membrane protein|g__Dorea.s__Dorea_formicigenerans	0.594542	0.259823	0.18231	0.771883	-Inf	0.000128454	0.997315
UniRef50_UPI0003B2E92F: pantoate--beta-alanine ligase	0.211634	0.0961534	0.0799038	0.248468	-Inf	0.00013024	0.997315
UniRef50_UPI0003B2E92F: pantoate--beta-alanine ligase|unclassified	0.211634	0.0961534	0.0799038	0.248468	-Inf	0.00013024	0.997315
UniRef50_U5MRE9: Transposase for insertion sequence element ISRM3-like protein	0.213751	0.0730977	0.0968892	0.193635	NA	0.000133384	0.997315
UniRef50_U5MRE9: Transposase for insertion sequence element ISRM3-like protein|unclassified	0.213751	0.0730977	0.0968892	0.193635	NA	0.000133384	0.997315
UniRef50_Q7VQD1: 30S ribosomal protein S5	0.197879	0.31323	0.243921	0.1334	NA	0.000137018	0.997315
UniRef50_Q7VQD1: 30S ribosomal protein S5|unclassified	0.197879	0.31323	0.243921	0.1334	NA	0.000137018	0.997315
UniRef50_R6S3R3	0.273945	0.553535	0.574697	0.315713	NA	0.000141083	0.997315
UniRef50_R5DFH8	0.899302	1.38386	2.0174	1.599	NA	0.000210271	0.997315
UniRef50_R5N8T0	0.105676	0.362302	0.276461	0.137119	NA	0.000210931	0.997315
UniRef50_R5N8T0|unclassified	0.105676	0.362302	0.276461	0.137119	NA	0.000210931	0.997315
UniRef50_S6CL16	0.117584	0.352899	0.41237	0.19436	NA	0.000211568	0.997315
UniRef50_S6CL16|g__Adlercreutzia.s__Adlercreutzia_equolifaciens	0.117584	0.352899	0.41237	0.19436	NA	0.000211568	0.997315
UniRef50_D4LND3: HD domain|g__Dorea.s__Dorea_formicigenerans	0.445494	0.255391	0.206617	1.27334	NA	0.000214761	0.997315
UniRef50_R6J0Z1: DNA-binding response regulator|unclassified	1.89688	2.68788	2.26162	2.03882	NA	0.000236308	0.997315
UniRef50_A7FQL2: UPF0313 protein CLB_0243|g__Lachnospiraceae_noname.s__Lachnospiraceae_bacterium_7_1_58FAA	0.146789	0.252653	0.271383	0.258406	NA	0.000247705	0.997315
UniRef50_A7TBZ0: Predicted protein (Fragment)	0.355763	0.464153	0.322571	0.24203	NA	0.000260084	0.997315
UniRef50_A7TBZ0: Predicted protein (Fragment)|unclassified	0.355763	0.464153	0.322571	0.24203	NA	0.000260084	0.997315
UniRef50_R5S5N3: Primosomal protein n|g__Lachnospiraceae_noname.s__Lachnospiraceae_bacterium_7_1_58FAA	0.0817781	0.172851	0.173297	0.16729	NA	0.000260084	0.997315
UniRef50_R5FTV5: tRNA-dihydrouridine synthase|unclassified	0.761363	0.816254	0.724691	0.564094	Inf	0.00026103	0.997315
UniRef50_K5DF25	5.95154	3.3248	2.28279	4.4704	NA	0.000267212	0.997315
UniRef50_R6J6J3: Translation elongation factor G	0.879674	1.05586	0.922011	0.664566	NA	0.000306609	0.997315
UniRef50_R6J6J3: Translation elongation factor G|unclassified	0.879674	1.05586	0.922011	0.664566	NA	0.000306609	0.997315
UniRef50_R5DFH8|g__Parabacteroides.s__Parabacteroides_merdae	0.843699	1.17125	1.89243	1.4776	NA	0.000307223	0.997315
UniRef50_R5CZ41: DNA topoisomerase	0.719188	0.958519	0.529557	0.7029	Inf	0.000307838	0.997315
UniRef50_R5CZ41: DNA topoisomerase|unclassified	0.719188	0.958519	0.529557	0.7029	Inf	0.000307838	0.997315
UniRef50_D4KZ58: Stage II sporulation protein R	1.0818	0.426603	0.971458	1.30565	NA	0.000328997	0.997315
UniRef50_K1TTL1	0.852475	1.41095	1.35138	0.606123	NA	0.00035211	0.997315
UniRef50_K1TTL1|unclassified	0.852475	1.41095	1.35138	0.606123	NA	0.00035211	0.997315
UniRef50_W6TML8	0.429139	0.808842	0.726651	0.511134	Inf	0.000371398	0.997315
UniRef50_W6TML8|unclassified	0.429139	0.808842	0.726651	0.511134	Inf	0.000371398	0.997315
UniRef50_H7DJW1: UDP-N-acetylglucosamine 1-carboxyvinyltransferase 2	0.184697	0.320602	0.429873	0.226731	NA	0.000378436	0.997315
UniRef50_H7DJW1: UDP-N-acetylglucosamine 1-carboxyvinyltransferase 2|unclassified	0.184697	0.320602	0.429873	0.226731	NA	0.000378436	0.997315
UniRef50_D4IQ51: RNA polymerase sigma factor, sigma-70 family|g__Alistipes.s__Alistipes_shahii	0.908606	1.26003	1.66807	1.13797	NA	0.000390697	0.997315
UniRef50_X1N2C1: Marine sediment metagenome DNA, contig: S06H3_S16921 (Fragment)	0.0244056	0.0819742	0.182343	0.0304605	-Inf	0.00039114	0.997315
UniRef50_X1N2C1: Marine sediment metagenome DNA, contig: S06H3_S16921 (Fragment)|unclassified	0.0244056	0.0819742	0.182343	0.0304605	-Inf	0.00039114	0.997315
UniRef50_A3CX26	3.99072	3.19389	10.3913	16.0606	NA	0.000393085	0.997315
UniRef50_N2AJ47	0.297792	0.117872	0.209485	0.29102	-Inf	0.000401012	0.997315
UniRef50_D4KU10: SpoVT / AbrB like domain|g__Eubacterium.s__Eubacterium_rectale	2.44728	1.19617	0.516786	1.42314	NA	0.000420743	0.997315
UniRef50_G7VQ24: Binding-protein-dependent transport systems inner membrane component	0.15252	0.108108	0.091108	0.233028	-Inf	0.000426022	0.997315
UniRef50_G7VQ24: Binding-protein-dependent transport systems inner membrane component|unclassified	0.15252	0.108108	0.091108	0.233028	-Inf	0.000426022	0.997315
UniRef50_Q64XK5: tRNA dimethylallyltransferase 2|unclassified	0.879837	1.11247	1.00241	0.836263	NA	0.000436351	0.997315
UniRef50_R5J559	1.0106	1.44468	1.51158	0.914635	NA	0.000444487	0.997315
UniRef50_R6Q632: Phosphomethylpyrimidine kinase	0.292588	0.537399	0.613453	0.40345	NA	0.000444487	0.997315
UniRef50_R6Q632: Phosphomethylpyrimidine kinase|unclassified	0.292588	0.537399	0.613453	0.40345	NA	0.000444487	0.997315
UniRef50_R6CND3: 2-methylthioadenine synthetase	0.736906	0.871009	0.680746	0.44869	NA	0.00044769	0.997315
UniRef50_R6CND3: 2-methylthioadenine synthetase|unclassified	0.736906	0.871009	0.680746	0.44869	NA	0.00044769	0.997315
UniRef50_R5BWA9|g__Coprococcus.s__Coprococcus_comes	0.660969	0.340125	0.491978	0.547203	NA	0.000450197	0.997315
UniRef50_R5CLV9: Quinolinate synthase A|unclassified	1.06865	1.2723	0.954758	0.514937	NA	0.000463474	0.997315
UniRef50_V9GC07: Polysaccharide ABC transporter permease	0.256481	0.146973	0.129243	0.258074	NA	0.000467497	0.997315
UniRef50_V9GC07: Polysaccharide ABC transporter permease|unclassified	0.256481	0.146973	0.129243	0.258074	NA	0.000467497	0.997315
UniRef50_R5ILR2	0.0927106	1.37683	1.7928	2.5727	Inf	0.000477602	0.997315
UniRef50_R6SA30: Glutamate--ammonia ligase catalytic domain protein	0.380806	0.472738	0.950776	0.533166	NA	0.000477602	0.997315
UniRef50_R6SA30: Glutamate--ammonia ligase catalytic domain protein|unclassified	0.380806	0.472738	0.950776	0.533166	NA	0.000477602	0.997315
UniRef50_F3ZZ86: Ribose import ATP-binding protein RbsA	0.932905	1.27881	1.11283	0.921213	NA	0.000479887	0.997315
UniRef50_F7M6T2|g__Bacteroides.s__Bacteroides_caccae	1.17135	1.72784	1.97779	1.1828	NA	0.000480003	0.997315
UniRef50_P70349: Histidine triad nucleotide-binding protein 1	0.099763	0.22855	0.231035	0.146403	Inf	0.000483023	0.997315
UniRef50_P70349: Histidine triad nucleotide-binding protein 1|unclassified	0.099763	0.22855	0.231035	0.146403	Inf	0.000483023	0.997315
UniRef50_G8N3W4: Transposase	0.307197	0.101062	0.112371	0.279197	-Inf	0.000494203	0.997315
UniRef50_G8N3W4: Transposase|unclassified	0.307197	0.101062	0.112371	0.279197	-Inf	0.000494203	0.997315
UniRef50_R5JQ34: RecQ family ATP-dependent DNA helicase|unclassified	0.531732	0.703893	0.664691	0.428322	Inf	0.000511745	0.997315
UniRef50_R7EMN8|g__Bacteroides.s__Bacteroides_uniformis	1.53	1.18485	4.09524	5.74258	NA	0.000529658	0.997315
UniRef50_R6JK20|g__Bacteroides.s__Bacteroides_caccae	0.944262	1.37558	1.33874	1.20116	Inf	0.000551255	0.997315
UniRef50_K1UML1: Amino acid/amide ABC transporter substrate-binding protein (Fragment)	2.24	3.72344	3.0701	2.14581	NA	0.000558517	0.997315
UniRef50_K1UML1: Amino acid/amide ABC transporter substrate-binding protein (Fragment)|unclassified	2.24	3.72344	3.0701	2.14581	NA	0.000558517	0.997315
UniRef50_R6TIY2	0.783973	0.618772	0.599407	1.63457	NA	0.000560902	0.997315
UniRef50_R6VJB3: ABC-type antimicrobial peptide transport system ATPase component|g__Coprococcus.s__Coprococcus_comes	0.599401	0.466653	0.280485	0.524994	NA	0.000563835	0.997315
UniRef50_F0R5H2	6.57829	4.46081	8.52535	9.81435	NA	0.000567248	0.997315
UniRef50_D2EXC5|unclassified	0.959651	0.602625	0.525591	1.3358	NA	0.000568373	0.997315
UniRef50_D4LSQ2: Nucleoside-binding protein|unclassified	0.671761	0.513876	0.573741	0.685365	NA	0.000577231	0.997315
UniRef50_E2NDU7	2.35543	3.50975	3.29977	2.3175	NA	0.000577231	0.997315
UniRef50_R5FTV5: tRNA-dihydrouridine synthase	0.809064	1.03306	0.740248	0.614461	Inf	0.000601848	0.997315
UniRef50_X1UD50: Marine sediment metagenome DNA, contig: S12H4_S09905 (Fragment)	0.458393	0.596995	0.679585	0.313836	NA	0.000602085	0.997315
UniRef50_X1UD50: Marine sediment metagenome DNA, contig: S12H4_S09905 (Fragment)|unclassified	0.458393	0.596995	0.679585	0.313836	NA	0.000602085	0.997315
UniRef50_R7IUU0: Protein translocase subunit SecY|g__Coprococcus.s__Coprococcus_comes	0.860635	0.40555	0.506138	0.96958	NA	0.000603678	0.997315
UniRef50_E6SUL6: Transcriptional repressor, CopY family|g__Alistipes.s__Alistipes_shahii	0.83882	1.42748	1.57202	1.00743	Inf	0.000610117	0.997315
UniRef50_UPI000469D8DD: hypothetical protein	0.795222	1.00013	0.907957	0.498744	NA	0.000611593	0.997315
UniRef50_UPI000469D8DD: hypothetical protein|unclassified	0.795222	1.00013	0.907957	0.498744	NA	0.000611593	0.997315
UniRef50_I9SK06	1.2569	1.4184	1.18481	0.794688	NA	0.000615066	0.997315
UniRef50_I9SK06|unclassified	1.2569	1.4184	1.18481	0.794688	NA	0.000615066	0.997315
UniRef50_X1IB53: Marine sediment metagenome DNA, contig: S03H2_S04501	0.338774	0.567665	0.380923	0.212465	NA	0.000628316	0.997315
UniRef50_X1IB53: Marine sediment metagenome DNA, contig: S03H2_S04501|unclassified	0.338774	0.567665	0.380923	0.212465	NA	0.000628316	0.997315
UniRef50_R6WKZ2	0.305966	0.18414	0.192837	0.244481	NA	0.000646623	0.997315
UniRef50_R6WKZ2|unclassified	0.305966	0.18414	0.192837	0.244481	NA	0.000646623	0.997315
UniRef50_E3ENH2: Two-component sensor kinase|unclassified	0.522751	0.333552	0.181059	0.325972	-Inf	0.000646623	0.997315
UniRef50_F0GTJ5	0.298479	0.391512	0.428666	0.357262	NA	0.000648726	0.997315
UniRef50_F0GTJ5|unclassified	0.298479	0.391512	0.428666	0.357262	NA	0.000648726	0.997315
UniRef50_R6X878: DNA topoisomerase type IIA subunit B region 2 domain-containing protein	0.676821	0.400064	0.207323	0.115657	NA	0.000654002	0.997315
UniRef50_R6X878: DNA topoisomerase type IIA subunit B region 2 domain-containing protein|unclassified	0.676821	0.400064	0.207323	0.115657	NA	0.000654002	0.997315
UniRef50_A0PXS6: Mini-ribonuclease 3	0.107424	0.186719	0.226437	0.0945363	Inf	0.000694077	0.997315
UniRef50_A0PXS6: Mini-ribonuclease 3|unclassified	0.107424	0.186719	0.226437	0.0945363	Inf	0.000694077	0.997315
UniRef50_A7AC07	1.21268	2.34222	3.90674	1.91369	-Inf	0.000694077	0.997315
UniRef50_A7AC07|g__Parabacteroides.s__Parabacteroides_merdae	1.21268	2.33974	3.90674	1.91369	-Inf	0.000694077	0.997315
UniRef50_X0UFN2: Marine sediment metagenome DNA, contig: S01H1_S10698 (Fragment)	0.549942	0.326228	0.447736	0.724063	NA	0.000694334	0.997315
UniRef50_X0UFN2: Marine sediment metagenome DNA, contig: S01H1_S10698 (Fragment)|unclassified	0.549942	0.326228	0.447736	0.724063	NA	0.000694334	0.997315
UniRef50_G1WPK7	1.2733	1.01293	0.848492	1.19198	NA	0.000695454	0.997315
UniRef50_G1WPK7|g__Dorea.s__Dorea_formicigenerans	1.2733	1.01293	0.848492	1.19198	NA	0.000695454	0.997315
UniRef50_R5UUF1: YhgE/Pip domain protein	4.78712	3.1031	3.17002	4.06005	NA	0.000698634	0.997315
UniRef50_F9Z5P7|unclassified	0.617338	1.27448	1.22956	0.863112	Inf	0.000701422	0.997315
UniRef50_Q71YN8: Peptidase T|g__Lachnospiraceae_noname.s__Lachnospiraceae_bacterium_7_1_58FAA	0.174444	0.302754	0.365729	0.333096	NA	0.00071609	0.997315
UniRef50_S7VSX6: Crossover junction endodeoxyribonuclease RuvC	0.2996	0.474667	0.309753	0.203363	Inf	0.000718329	0.997315
UniRef50_S7VSX6: Crossover junction endodeoxyribonuclease RuvC|unclassified	0.2996	0.474667	0.309753	0.203363	Inf	0.000718329	0.997315
UniRef50_W0EM69: TonB-denpendent receptor	2.27234	3.45434	4.98022	2.84242	Inf	0.00074799	0.997315
UniRef50_D2CIV2: 1-deoxy-D-xylulose-5-phosphate reductoisomerase (Fragment)	0.347552	0.150403	0.157679	0.485974	NA	0.000752021	0.997315
UniRef50_D2CIV2: 1-deoxy-D-xylulose-5-phosphate reductoisomerase (Fragment)|unclassified	0.347552	0.150403	0.157679	0.485974	NA	0.000752021	0.997315
UniRef50_R7E5M9	0.527103	3.22457	2.58723	0.623456	Inf	0.000769212	0.997315
UniRef50_R5YFV5: Serine-type D-Ala-D-Ala carboxypeptidase	0.745774	0.431761	0.248425	0.71441	NA	0.000783228	0.997315
UniRef50_R5YFV5: Serine-type D-Ala-D-Ala carboxypeptidase|unclassified	0.745774	0.431761	0.248425	0.71441	NA	0.000783228	0.997315
UniRef50_R5NR26: Aluminum resistance family protein	0.571501	0.652445	0.552929	0.418552	NA	0.000784121	0.997315
UniRef50_R5NR26: Aluminum resistance family protein|unclassified	0.571501	0.652445	0.552929	0.418552	NA	0.000784121	0.997315
UniRef50_R5CRK5: Conserved domain protein	1.44744	2.32461	1.36502	1.00997	NA	0.000787932	0.997315
UniRef50_R5CRK5: Conserved domain protein|unclassified	1.44744	2.32461	1.36502	1.00997	NA	0.000787932	0.997315
UniRef50_A0A015U6Z4	0.108855	0.0487964	0.0431109	0.258821	-Inf	0.00079589	0.997315
UniRef50_A0A015U6Z4|unclassified	0.108855	0.0487964	0.0431109	0.258821	-Inf	0.00079589	0.997315
UniRef50_R9KSW8	0.330611	0.178647	0.15067	0.465783	NA	0.000799026	0.997315
UniRef50_R9KSW8|unclassified	0.330611	0.178647	0.15067	0.465783	NA	0.000799026	0.997315
UniRef50_D7GTZ6: Predicted transcriptional regulator	3.75486	1.94928	2.28797	3.77218	NA	0.000799037	0.997315
UniRef50_Q8A6A7: Holliday junction ATP-dependent DNA helicase RuvA|unclassified	0.687005	0.992383	0.921909	0.644647	Inf	0.00079989	0.997315
UniRef50_I0TAN2: DNA-binding helix-turn-helix protein	0.516101	0.813973	0.560318	0.320063	NA	0.000803395	0.997315
UniRef50_I0TAN2: DNA-binding helix-turn-helix protein|unclassified	0.516101	0.813973	0.560318	0.320063	NA	0.000803395	0.997315
UniRef50_D4M5F4: MTH538 TIR-like domain (DUF1863)	2.5513	1.76145	1.45636	2.0737	-Inf	0.000804215	0.997315
UniRef50_K1SSG0	0.717217	0.76239	0.491589	0.255572	-Inf	0.000805992	0.997315
UniRef50_K1SSG0|unclassified	0.717217	0.76239	0.491589	0.255572	-Inf	0.000805992	0.997315
UniRef50_K1TDJ5: RNA polymerase sigma-54 factor	0.676963	0.832914	0.769724	0.390956	-Inf	0.000805992	0.997315
UniRef50_K1TDJ5: RNA polymerase sigma-54 factor|unclassified	0.676963	0.832914	0.769724	0.390956	-Inf	0.000805992	0.997315
UniRef50_B1C8F8: Putative delta-lactam-biosynthetic de-N-acetylase	0.504057	0.656604	0.759513	0.622708	NA	0.00080907	0.997315
UniRef50_B1C8F8: Putative delta-lactam-biosynthetic de-N-acetylase|unclassified	0.504057	0.656604	0.759513	0.622708	NA	0.00080907	0.997315
UniRef50_J9R2B3: RecA/RadA recombinase	0.596826	0.778982	0.788998	0.455204	NA	0.00080907	0.997315
UniRef50_J9R2B3: RecA/RadA recombinase|unclassified	0.596826	0.778982	0.788998	0.455204	NA	0.00080907	0.997315
UniRef50_U5PDM3: Glucosamine-6-phosphate deaminase	0.197094	0.329912	0.289257	0.189886	NA	0.000818186	0.997315
UniRef50_U5PDM3: Glucosamine-6-phosphate deaminase|unclassified	0.197094	0.329912	0.289257	0.189886	NA	0.000818186	0.997315
UniRef50_D4K5A0: ATP synthase subunit a|g__Lachnospiraceae_noname.s__Lachnospiraceae_bacterium_7_1_58FAA	0.148846	0.295008	0.342732	0.243591	NA	0.000820328	0.997315
UniRef50_K1UT59: DNA-directed RNA polymerase subunit beta (Fragment)	0.902096	1.05041	0.809979	0.539218	NA	0.000831381	0.997315
UniRef50_K1UT59: DNA-directed RNA polymerase subunit beta (Fragment)|unclassified	0.902096	1.05041	0.809979	0.539218	NA	0.000831381	0.997315
UniRef50_R5GQD3: Cytoplasmic L-asparaginase I|unclassified	0.625718	0.910854	0.912766	0.608725	NA	0.000842154	0.997315
UniRef50_C7MPD2: Pyridoxal phosphate synthase yaaE subunit	0.310564	0.223283	0.189566	0.414383	NA	0.000847475	0.997315
UniRef50_C7MPD2: Pyridoxal phosphate synthase yaaE subunit|unclassified	0.310564	0.223283	0.189566	0.414383	NA	0.000847475	0.997315
UniRef50_R7QZB3|unclassified	0.299462	0.132124	0.20307	0.312474	NA	0.000854519	0.997315
UniRef50_I5AW08: Release factor glutamine methyltransferase	0.302095	0.131952	0.142657	0.341148	NA	0.000855117	0.997315
UniRef50_I5AW08: Release factor glutamine methyltransferase|unclassified	0.302095	0.131952	0.142657	0.341148	NA	0.000855117	0.997315
UniRef50_N7LQY3: Small GTP-binding protein domain	0.411258	0.579916	0.492377	0.401437	NA	0.000865695	0.997315
UniRef50_N7LQY3: Small GTP-binding protein domain|unclassified	0.411258	0.579916	0.492377	0.401437	NA	0.000865695	0.997315
UniRef50_X1D611: Marine sediment metagenome DNA, contig: S01H4_S10880 (Fragment)	0.786497	0.982728	0.887341	0.629119	NA	0.000870034	0.997315
UniRef50_X1D611: Marine sediment metagenome DNA, contig: S01H4_S10880 (Fragment)|unclassified	0.786497	0.982728	0.887341	0.629119	NA	0.000870034	0.997315
UniRef50_R5FWP1|unclassified	3.48505	4.53085	4.39195	3.05154	NA	0.000892546	0.997315
UniRef50_C3QV39|g__Bacteroides.s__Bacteroides_caccae	0.842669	1.63526	2.19194	1.52614	Inf	0.000895092	0.997315
UniRef50_G9YIK8	0.148353	0.0923543	0.0820096	0.202066	NA	0.000896851	0.997315
UniRef50_G9YIK8|unclassified	0.148353	0.0923543	0.0820096	0.202066	NA	0.000896851	0.997315
UniRef50_U6RJV4: Membrane fusion protein	0.695214	1.04854	1.4122	0.961781	NA	0.000896851	0.997315
UniRef50_U6RJV4: Membrane fusion protein|unclassified	0.695214	1.04854	1.4122	0.961781	NA	0.000896851	0.997315
UniRef50_Q89J92: 50S ribosomal protein L29|unclassified	0.18699	0.0864024	0.0658082	0.164058	NA	0.000899821	0.997315
UniRef50_R7CK71|unclassified	0.662093	0.323509	0.489699	0.697585	NA	0.000899821	0.997315
UniRef50_Q9ZKX5: Catalase|unclassified	0.0500739	0.165099	0.14001	0.0950232	Inf	0.00090305	0.997315
UniRef50_D4IXB1: Transcriptional regulator, GntR family|unclassified	0.935635	0.736368	0.578148	0.891918	NA	0.000905119	0.997315
UniRef50_K1TWM7: Protein containing TonB-dependent receptor, beta-barrel domain protein	0.391158	0.760577	0.542864	0.537242	Inf	0.000908468	0.997315
UniRef50_K1TWM7: Protein containing TonB-dependent receptor, beta-barrel domain protein|unclassified	0.391158	0.760577	0.542864	0.537242	Inf	0.000908468	0.997315
UniRef50_E6UHP1: MazG family protein	0.239383	0.446989	0.364932	0.238216	Inf	0.00091142	0.997315
UniRef50_E6UHP1: MazG family protein|unclassified	0.239383	0.446989	0.364932	0.238216	Inf	0.00091142	0.997315
UniRef50_R7A038: ATPase components of ABC transporters with duplicated ATPase domains	0.368828	0.102761	0.427018	0.680448	NA	0.000913567	0.997315
UniRef50_A5Z4V5|unclassified	0.956943	1.94599	3.60313	1.18479	-Inf	0.000921454	0.997315
UniRef50_A5N2V1: Predicted transposase	1.08033	0.728655	0.889139	1.38048	NA	0.000922275	0.997315
UniRef50_R5WWP3: Predicted hydrolase or acyltransferase of alpha/beta superfamily|g__Dorea.s__Dorea_formicigenerans	1.877	1.23253	0.839507	2.77917	NA	0.000933651	0.997315
UniRef50_B5QJ46	4.82975	6.23444	5.85819	4.81752	NA	0.000935139	0.997315
UniRef50_B5QJ46|unclassified	4.82975	6.23444	5.85819	4.81752	NA	0.000935139	0.997315
UniRef50_F3ZZ86: Ribose import ATP-binding protein RbsA|unclassified	0.891317	1.19522	1.06848	0.889473	NA	0.000935139	0.997315
UniRef50_K1TLU7: Protein containing DUF28	1.11784	1.29738	1.15068	0.72298	NA	0.000935139	0.997315
UniRef50_K1TLU7: Protein containing DUF28|unclassified	1.11784	1.29738	1.15068	0.72298	NA	0.000935139	0.997315
UniRef50_K1U4S0: V-type ATP synthase subunit A (Fragment)	2.9136	3.78565	4.50641	2.53594	NA	0.000935139	0.997315
UniRef50_K1U4S0: V-type ATP synthase subunit A (Fragment)|unclassified	2.9136	3.78565	4.50641	2.53594	NA	0.000935139	0.997315
UniRef50_R6EGE7: FeS assembly SUF system protein|unclassified	0.654068	1.03718	0.758923	0.456575	NA	0.000961129	0.997315
UniRef50_R5WAX9|g__Alistipes.s__Alistipes_shahii	0.608439	0.909966	1.03077	0.840813	NA	0.000976378	0.997315
UniRef50_R7NKI0	0.997171	0.309927	0.586736	0.882319	NA	0.000976378	0.997315
UniRef50_R7NKI0|unclassified	0.997171	0.309927	0.586736	0.882319	NA	0.000976378	0.997315
UniRef50_X1TPB2: Marine sediment metagenome DNA, contig: S12H4_L04924 (Fragment)	0.106373	0.0928617	0.233866	0.0738743	-Inf	0.000978299	0.997315
UniRef50_X1TPB2: Marine sediment metagenome DNA, contig: S12H4_L04924 (Fragment)|unclassified	0.106373	0.0928617	0.233866	0.0738743	-Inf	0.000978299	0.997315
UniRef50_R5F2B6|unclassified	0.226636	0.327812	0.360354	0.174948	-Inf	0.000985838	0.997315
UniRef50_R6WSL5|unclassified	0.203504	0.494953	0.501664	0.216455	-Inf	0.000985838	0.997315
UniRef50_B6EP03: Dihydroxy-acid dehydratase	0.324315	0.393787	0.331695	0.26577	NA	0.000985985	0.997315
UniRef50_B6EP03: Dihydroxy-acid dehydratase|unclassified	0.324315	0.393787	0.331695	0.26577	NA	0.000985985	0.997315
UniRef50_A6BCW0|unclassified	0.84671	1.61769	1.48224	1.20053	NA	0.00100463	0.997315
UniRef50_Q4FS54: Dihydroxy-acid dehydratase	0.365073	0.480334	0.43531	0.373943	NA	0.00100463	0.997315
UniRef50_G5FI22	0.4044	0.822028	1.00842	0.697539	NA	0.00101074	0.997315
UniRef50_G5FI22|unclassified	0.4044	0.822028	1.00842	0.697539	NA	0.00101074	0.997315
UniRef50_A6L0R4|g__Parabacteroides.s__Parabacteroides_merdae	0.692803	1.1532	0.861316	0.350551	NA	0.00102523	0.997315
UniRef50_X1FX08: Marine sediment metagenome DNA, contig: S01H4_S24887 (Fragment)	0.0471406	0.221314	0.262447	0.126203	Inf	0.00104233	0.997315
UniRef50_X1FX08: Marine sediment metagenome DNA, contig: S01H4_S24887 (Fragment)|unclassified	0.0471406	0.221314	0.262447	0.126203	Inf	0.00104233	0.997315
UniRef50_D4M5F4: MTH538 TIR-like domain (DUF1863)|unclassified	2.5513	1.76145	1.42648	2.01396	NA	0.00106039	0.997315
UniRef50_J9FWN2: Orotidine 5'-phosphate decarboxylase	0.225399	0.384262	0.373362	0.117145	NA	0.00106406	0.997315
UniRef50_J9FWN2: Orotidine 5'-phosphate decarboxylase|unclassified	0.225399	0.384262	0.373362	0.117145	NA	0.00106406	0.997315
UniRef50_R6MWL5: ABC transporter permease protein	0.356717	0.196678	0.476631	0.38301	NA	0.00107079	0.997315
UniRef50_R6MWL5: ABC transporter permease protein|g__Clostridium.s__Clostridium_leptum	0.350476	0.196678	0.476631	0.38301	NA	0.00107079	0.997315
UniRef50_R6GMB7: MATE efflux family protein	14.8371	10.8093	10.5728	13.1979	NA	0.00107878	0.997315
UniRef50_Q7MUX4: Orotate phosphoribosyltransferase|unclassified	0.48877	0.473058	0.510536	0.294515	-Inf	0.00109083	0.997315
UniRef50_R5F2K6	0.316032	0.463501	0.557843	0.251938	Inf	0.00109527	0.997315
UniRef50_I2FDH0	0.209388	0.247688	0.336766	0.167644	-Inf	0.00109667	0.997315
UniRef50_I2FDH0|unclassified	0.209388	0.247688	0.336766	0.167644	-Inf	0.00109667	0.997315
UniRef50_R5KVK5: ABC transporter ATP-binding protein	0.226629	0.118846	0.157612	0.311791	NA	0.00111329	0.997315
UniRef50_R6IVQ3: Putative sigma E regulatory protein MucB/RseB|g__Akkermansia.s__Akkermansia_muciniphila	0.573854	2.63522	1.85914	0.822056	NA	0.00111416	0.997315
UniRef50_R5U5W6	2.10867	3.85716	3.16179	2.19377	NA	0.00111804	0.997315
UniRef50_E5VG38: Transglycosylase SLT domain-containing protein (Fragment)	0.968706	1.3835	1.23546	0.801323	NA	0.0011354	0.997315
UniRef50_E5VG38: Transglycosylase SLT domain-containing protein (Fragment)|unclassified	0.968706	1.3835	1.23546	0.801323	NA	0.0011354	0.997315
UniRef50_V8C3P3|unclassified	0.595961	0.320591	0.332296	0.355646	NA	0.00113672	0.997315
UniRef50_C7RI48: 23S rRNA (Uracil-5-)-methyltransferase RumA	0.642069	0.406131	0.436895	0.542815	NA	0.00115044	0.997315
UniRef50_A9QTK1: Catalase (Fragment)	0.112422	0.270128	0.265089	0.211363	NA	0.0011538	0.997315
UniRef50_A9QTK1: Catalase (Fragment)|unclassified	0.112422	0.270128	0.265089	0.211363	NA	0.0011538	0.997315
UniRef50_D4MNV3: DNA gyrase subunit B|unclassified	1.70841	2.15096	2.31082	1.88625	NA	0.00115784	0.997315
UniRef50_A8DWH8: Predicted protein	0.502792	0.727508	0.719883	0.512661	NA	0.00116003	0.997315
UniRef50_A8DWH8: Predicted protein|unclassified	0.502792	0.727508	0.719883	0.512661	NA	0.00116003	0.997315
UniRef50_R5EZQ2	0.583811	0.85026	0.780105	0.485416	NA	0.00116367	0.997315
UniRef50_R5EZQ2|unclassified	0.583811	0.85026	0.780105	0.485416	NA	0.00116367	0.997315
UniRef50_R7CK71	1.05069	0.45097	1.00075	1.77261	NA	0.00116367	0.997315
UniRef50_A6LCS5: Methionyl-tRNA formyltransferase|unclassified	0.741688	0.989595	1.09738	0.662	NA	0.00118824	0.997315
UniRef50_A0A022S4J5: Catalase family protein	0.186286	0.284392	0.353135	0.170503	Inf	0.00118961	0.997315
UniRef50_A0A022S4J5: Catalase family protein|unclassified	0.186286	0.284392	0.353135	0.170503	Inf	0.00118961	0.997315
UniRef50_E4T3Y0: Flavodoxin/nitric oxide synthase|g__Alistipes.s__Alistipes_shahii	0.63997	0.916573	1.09681	0.820423	Inf	0.00118961	0.997315
UniRef50_D4C1S8	0.366861	0.876026	0.566605	0.502523	Inf	0.00119135	0.997315
UniRef50_D4C1S8|unclassified	0.366861	0.876026	0.566605	0.502523	Inf	0.00119135	0.997315
UniRef50_K1RN75: Peptide chain release factor 1	1.50931	1.97413	2.34554	1.40153	NA	0.00119703	0.997315
UniRef50_K1RN75: Peptide chain release factor 1|unclassified	1.50931	1.97413	2.34554	1.40153	NA	0.00119703	0.997315
UniRef50_H2JDX4: Ribosomal silencing factor RsfS	0.482677	0.719436	0.761176	0.617982	NA	0.0011979	0.997315
UniRef50_H2JDX4: Ribosomal silencing factor RsfS|unclassified	0.482677	0.719436	0.761176	0.617982	NA	0.0011979	0.997315
UniRef50_R6DTR8	1.35904	1.20872	1.52861	1.64912	-Inf	0.00120483	0.997315
UniRef50_R6DTR8|unclassified	1.35904	1.20872	1.52861	1.64912	-Inf	0.00120483	0.997315
UniRef50_D4MRW3	0.603228	0.394075	0.313083	0.632034	NA	0.00121231	0.997315
UniRef50_D4MRW3|unclassified	0.603228	0.394075	0.313083	0.632034	NA	0.00121231	0.997315
UniRef50_R5UB53	0.58378	0.210032	0.478115	0.501225	NA	0.0012125	0.997315
UniRef50_J9GVW6: 3-methyl-2-oxobutanoate dehydrogenase (Ferredoxin) (Fragment)|unclassified	0.68757	0.806868	0.955703	0.942551	NA	0.00124211	0.997315
UniRef50_R7EYT6: Penicillin-binding protein 2|unclassified	0.387595	0.517574	0.45292	0.317159	Inf	0.00124656	0.997315
UniRef50_E6WX55: Xylose isomerase|unclassified	0.191872	0.39058	0.413922	0.352087	Inf	0.0012496	0.997315
UniRef50_R5PBC7: Translation initiation factor IF-2	0.469903	0.560619	0.531545	0.388829	NA	0.00125183	0.997315
UniRef50_R5PBC7: Translation initiation factor IF-2|unclassified	0.469903	0.560619	0.531545	0.388829	NA	0.00125183	0.997315
UniRef50_I4AG14: Transcription elongation factor GreA	0.0788218	0.196796	0.161963	0.0841489	NA	0.00125355	0.997315
UniRef50_I4AG14: Transcription elongation factor GreA|unclassified	0.0788218	0.196796	0.161963	0.0841489	NA	0.00125355	0.997315
UniRef50_H1CIP0	0.196307	0.263215	0.292595	0.271779	NA	0.00126754	0.997315
UniRef50_R6DEF6	0.508286	0.660863	0.857591	0.584667	Inf	0.00126782	0.997315
UniRef50_R6DEF6|unclassified	0.508286	0.660863	0.857591	0.584667	Inf	0.00126782	0.997315
UniRef50_R6U761|g__Clostridium.s__Clostridium_leptum	0.456022	0.301525	0.660977	0.672932	NA	0.00126782	0.997315
UniRef50_A6LCU2: Sec-independent protein translocase protein TatA|unclassified	0.218352	0.55513	0.246227	0.324862	Inf	0.00126974	0.997315
UniRef50_F3BCL8	1.64134	1.11137	1.20144	1.79192	NA	0.00127128	0.997315
UniRef50_F3BCL8|unclassified	1.64134	1.11137	1.20144	1.79192	NA	0.00127128	0.997315
UniRef50_K1TYT6	2.24516	2.96591	2.54452	2.16241	NA	0.00127709	0.997315
UniRef50_K1TYT6|unclassified	2.24516	2.96591	2.54452	2.16241	NA	0.00127709	0.997315
UniRef50_X5JI13: ATP synthase alpha chain	0.192848	0.475184	0.328674	0.254959	NA	0.00127709	0.997315
UniRef50_X5JI13: ATP synthase alpha chain|unclassified	0.192848	0.475184	0.328674	0.254959	NA	0.00127709	0.997315
UniRef50_I5AX83: Pyrimidine reductase, riboflavin biosynthesis	0.930912	0.982178	0.914812	0.50834	NA	0.00130444	0.997315
UniRef50_C3ICC0: Transcriptional regulator, GntR	0.436888	0.307738	0.260673	0.501608	NA	0.00130878	0.997315
UniRef50_A5Z5J6|unclassified	2.13134	2.76061	4.1417	2.44684	-Inf	0.00130878	0.997315
UniRef50_G9RZA1	0.680261	0.539	0.474362	0.79243	NA	0.00131565	0.997315
UniRef50_J9G552: Excision endonuclease subunit UvrB (Fragment)	1.31783	1.413	1.1386	0.94234	NA	0.00133189	0.997315
UniRef50_J9G552: Excision endonuclease subunit UvrB (Fragment)|unclassified	1.31783	1.413	1.1386	0.94234	NA	0.00133189	0.997315
UniRef50_R6MPD7: Transporter major facilitator family	6.25315	4.39109	6.82655	8.55672	NA	0.00133189	0.997315
UniRef50_C5EH06	0.925743	0.977476	1.04594	1.49189	NA	0.00133407	0.997315
UniRef50_S0FAY9	0.610164	0.651493	1.94191	1.90047	-Inf	0.00134337	0.997315
UniRef50_W6P8H7: Transketolase|unclassified	0.757033	0.960077	0.874891	0.557809	NA	0.0013434	0.997315
UniRef50_A0A015WRR2: Tex-like N-terminal domain protein (Fragment)	0.204465	0.296627	0.282955	0.195981	NA	0.0013552	0.997315
UniRef50_A0A015WRR2: Tex-like N-terminal domain protein (Fragment)|unclassified	0.204465	0.296627	0.282955	0.195981	NA	0.0013552	0.997315
UniRef50_K1TG95: Glucokinase, ROK family	1.06069	1.7609	2.22609	1.21415	NA	0.00136013	0.997315
UniRef50_K1TG95: Glucokinase, ROK family|unclassified	1.06069	1.7609	2.22609	1.21415	NA	0.00136013	0.997315
UniRef50_H1C721: Stage III sporulation protein AB	0.247446	0.0869536	0.106145	0.373712	NA	0.00138101	0.997315
UniRef50_R6RG14	0.316165	0.210258	0.275425	0.29992	NA	0.00139373	0.997315
UniRef50_R6RG14|unclassified	0.316165	0.210258	0.275425	0.29992	NA	0.00139373	0.997315
UniRef50_M6T7Z0: GHKL domain protein	0.24008	0.456898	0.303148	0.162187	NA	0.00139501	0.997315
UniRef50_M6T7Z0: GHKL domain protein|unclassified	0.24008	0.456898	0.303148	0.162187	NA	0.00139501	0.997315
UniRef50_R5D9B7: Bile acid transporter|unclassified	1.44085	0.928168	0.916275	1.50168	NA	0.00139919	0.997315
UniRef50_F8IIL4: CDP-diacylglycerol/glycerol-3-phosphate 3-phosphatidyltransferase	0.257147	0.543569	0.58792	0.441489	NA	0.00141001	0.997315
UniRef50_F8IIL4: CDP-diacylglycerol/glycerol-3-phosphate 3-phosphatidyltransferase|unclassified	0.257147	0.543569	0.58792	0.441489	NA	0.00141001	0.997315
UniRef50_B9E0J8|unclassified	0.42498	0.564813	0.570597	0.402477	NA	0.0014275	0.997315
UniRef50_U2TAW9	0.344024	0.503497	0.467613	0.411146	NA	0.0014275	0.997315
UniRef50_U2TAW9|unclassified	0.344024	0.503497	0.467613	0.411146	NA	0.0014275	0.997315
UniRef50_R5Z987: Type II secretory pathway pullulanase PulA and related glycosidases	0.289269	0.186176	0.0651309	0.370909	NA	0.00143094	0.997315
UniRef50_R5Z987: Type II secretory pathway pullulanase PulA and related glycosidases|unclassified	0.289269	0.186176	0.0651309	0.370909	NA	0.00143094	0.997315
UniRef50_W2C851: Endoribonuclease YbeY	0.361579	0.560764	0.407297	0.180609	-Inf	0.00143776	0.997315
UniRef50_W2C851: Endoribonuclease YbeY|unclassified	0.361579	0.560764	0.407297	0.180609	-Inf	0.00143776	0.997315
UniRef50_R5SG20	0.669135	1.02077	0.943976	0.834074	-Inf	0.00144915	0.997315
UniRef50_R7P7Y1: ATPase/histidine kinase/DNA gyrase B/HSP90 domain protein	0.290101	0.3484	0.502445	0.168839	Inf	0.00144942	0.997315
UniRef50_R7P7Y1: ATPase/histidine kinase/DNA gyrase B/HSP90 domain protein|unclassified	0.290101	0.3484	0.502445	0.168839	Inf	0.00144942	0.997315
UniRef50_W4PS81: Excinuclease ABC subunit A|unclassified	0.814363	0.933769	0.879322	0.692892	NA	0.00145017	0.997315
UniRef50_R6LQ74: Mini-ribonuclease 3|g__Coprococcus.s__Coprococcus_comes	0.869452	0.514673	0.467713	1.35958	NA	0.00146802	0.997315
UniRef50_R6YIV3	0.337026	0.606234	0.520498	0.171575	NA	0.00148087	0.997315
UniRef50_R6YIV3|unclassified	0.337026	0.606234	0.520498	0.171575	NA	0.00148087	0.997315
UniRef50_R5AKJ4: RNA polymerase sigma factor sigma-70 family|unclassified	1.59725	2.20103	2.18106	1.44924	NA	0.00149355	0.997315
UniRef50_C4Z3L0|unclassified	0.579679	0.388148	0.280679	0.61339	-Inf	0.00152338	0.997315
UniRef50_K1SPC9: Aconitate hydratase (Fragment)	1.10753	1.48409	1.31704	0.949075	NA	0.00152925	0.997315
UniRef50_K1SPC9: Aconitate hydratase (Fragment)|unclassified	1.10753	1.48409	1.31704	0.949075	NA	0.00152925	0.997315
UniRef50_R5F7X5	5.15909	8.37348	6.26146	6.20993	NA	0.00152925	0.997315
UniRef50_C6LD95	1.79511	2.35785	1.01761	1.94025	-Inf	0.00153349	0.997315
UniRef50_I3YQ36: TIGR02757 family protein|g__Alistipes.s__Alistipes_putredinis	2.70854	3.3349	2.73251	2.40713	Inf	0.00153706	0.997315
UniRef50_K1UL71: DNA modification methyltransferase (Fragment)	0.592163	0.944572	1.14625	0.578449	NA	0.00153778	0.997315
UniRef50_K1UL71: DNA modification methyltransferase (Fragment)|unclassified	0.592163	0.944572	1.14625	0.578449	NA	0.00153778	0.997315
UniRef50_R6LDF8|g__Bacteroides.s__Bacteroides_caccae	1.39228	1.82784	1.55557	1.48827	Inf	0.00154101	0.997315
UniRef50_R5TGD2: N-acetylglucosaminylphosphatidylinositol deacetylase family protein	0.198816	0.0306206	0.033253	0.181697	NA	0.00155708	0.997315
UniRef50_R5YWU2: Predicted membrane protein|g__Alistipes.s__Alistipes_shahii	0.489471	1.12028	1.2965	1.03857	NA	0.0015669	0.997315
UniRef50_Q67KX2: Acetolactate synthase small subunit	0.0494107	0.32776	0.210518	0.161161	Inf	0.00157468	0.997315
UniRef50_Q67KX2: Acetolactate synthase small subunit|unclassified	0.0494107	0.32776	0.210518	0.161161	Inf	0.00157468	0.997315
UniRef50_R6TQR3: DNA polymerase III polC-type	0.308347	0.406692	0.348888	0.281697	NA	0.00157582	0.997315
UniRef50_R6TQR3: DNA polymerase III polC-type|unclassified	0.308347	0.406692	0.348888	0.281697	NA	0.00157582	0.997315
UniRef50_R5L917: UvrD/REP helicase	0.127134	0.158395	0.253568	0.0802008	Inf	0.00157886	0.997315
UniRef50_R5L917: UvrD/REP helicase|unclassified	0.127134	0.158395	0.253568	0.0802008	Inf	0.00157886	0.997315
UniRef50_N9YAM2|unclassified	0.27832	0.212946	0.0646074	0.299448	NA	0.00157886	0.997315
UniRef50_E5VHP3: Glycogen branching enzyme	0.450547	1.17535	1.31026	0.610744	-Inf	0.00157886	0.997315
UniRef50_R5PJ20: 3-dehydroquinate dehydratase|unclassified	0.745004	1.01916	1.13836	1.59226	NA	0.0015814	0.997315
UniRef50_U7UWY8: Transcriptional regulator, GntR family	0.256162	0.0899328	0.145702	0.214819	NA	0.00158171	0.997315
UniRef50_U7UWY8: Transcriptional regulator, GntR family|unclassified	0.256162	0.0899328	0.145702	0.214819	NA	0.00158171	0.997315
UniRef50_T0NQP3	0.217048	0.296065	0.2815	0.103089	NA	0.00159202	0.997315
UniRef50_T0NQP3|unclassified	0.217048	0.296065	0.2815	0.103089	NA	0.00159202	0.997315
UniRef50_E1LFV5: 6-phospho-beta-glucosidase bglA	0.337541	0.495725	0.758113	1.33456	Inf	0.00162014	0.997315
UniRef50_E1LFV5: 6-phospho-beta-glucosidase bglA|unclassified	0.337541	0.495725	0.758113	1.33456	Inf	0.00162014	0.997315
UniRef50_A9KLX7: Ribosomal RNA small subunit methyltransferase G|g__Dorea.s__Dorea_formicigenerans	0.151535	0.0562689	0.125186	0.279161	NA	0.00162756	0.997315
UniRef50_D3EBM9: Binding-protein-dependent transport systems inner membrane component	0.265388	0.183081	0.227028	0.39598	NA	0.00163401	0.997315
UniRef50_D3EBM9: Binding-protein-dependent transport systems inner membrane component|unclassified	0.265388	0.183081	0.227028	0.39598	NA	0.00163401	0.997315
UniRef50_R7DW31	0.759744	3.38002	2.30076	1.10755	Inf	0.00163506	0.997315
UniRef50_R6RVZ3|g__Bacteroides.s__Bacteroides_caccae	1.20266	1.3782	1.30581	0.982887	NA	0.00163506	0.997315
UniRef50_UPI0002555EAC: LysR family transcriptional regulator, partial	0.115999	0.0821432	0.0463725	0.118842	NA	0.00163506	0.997315
UniRef50_UPI0002555EAC: LysR family transcriptional regulator, partial|unclassified	0.115999	0.0821432	0.0463725	0.118842	NA	0.00163506	0.997315
UniRef50_E3GX41: H(+)-transporting two-sector ATPase	0.723919	0.864555	1.04973	0.792735	-Inf	0.00163746	0.997315
UniRef50_E3GX41: H(+)-transporting two-sector ATPase|unclassified	0.723919	0.864555	1.04973	0.792735	-Inf	0.00163746	0.997315
UniRef50_Q4FS54: Dihydroxy-acid dehydratase|unclassified	0.358358	0.475341	0.431688	0.373943	NA	0.00163751	0.997315
UniRef50_Q64XQ0: Lipoyl synthase	14.9904	17.4137	13.2666	13.1622	NA	0.00163751	0.997315
UniRef50_R9H530|unclassified	1.11998	1.29907	1.21051	0.899121	NA	0.00163751	0.997315
UniRef50_X1L1I5: Marine sediment metagenome DNA, contig: S03H2_S31059 (Fragment)	0.609509	0.852311	0.913501	0.72778	NA	0.00163751	0.997315
UniRef50_X1L1I5: Marine sediment metagenome DNA, contig: S03H2_S31059 (Fragment)|unclassified	0.609509	0.852311	0.913501	0.72778	NA	0.00163751	0.997315
UniRef50_X1N092: Marine sediment metagenome DNA, contig: S06H3_L00635	0.492165	0.710771	0.571006	0.425562	NA	0.00163751	0.997315
UniRef50_X1N092: Marine sediment metagenome DNA, contig: S06H3_L00635|unclassified	0.492165	0.710771	0.571006	0.425562	NA	0.00163751	0.997315
UniRef50_V8FQ13	0.619043	0.279568	0.399471	0.59332	NA	0.00163791	0.997315
UniRef50_V8FQ13|unclassified	0.619043	0.279568	0.399471	0.59332	NA	0.00163791	0.997315
UniRef50_R5G7Y9: Riboflavin synthase alpha subunit|unclassified	0.405391	0.537676	0.474609	0.347479	Inf	0.00164269	0.997315
UniRef50_K1UAM0: Site-specific recombinase, phage integrase family (Fragment)	0.885562	1.08249	1.07831	0.761504	NA	0.0016435	0.997315
UniRef50_K1UAM0: Site-specific recombinase, phage integrase family (Fragment)|unclassified	0.885562	1.08249	1.07831	0.761504	NA	0.0016435	0.997315
UniRef50_R6J369: 2-isopropylmalate synthase	0.190485	0.699491	0.678315	0.414069	-Inf	0.00164991	0.997315
UniRef50_R6J369: 2-isopropylmalate synthase|unclassified	0.190485	0.699491	0.678315	0.414069	-Inf	0.00164991	0.997315
UniRef50_R5HZM7	0.567067	0.327806	0.250216	0.473594	NA	0.00166483	0.997315
UniRef50_J9FY02: 3-isopropylmalate dehydrogenase	0.647996	0.883413	0.937501	0.681617	NA	0.00166487	0.997315
UniRef50_J9FY02: 3-isopropylmalate dehydrogenase|unclassified	0.647996	0.883413	0.937501	0.681617	NA	0.00166487	0.997315
UniRef50_R7JN15: Peptidase M23 family	2.8996	3.44998	3.01608	2.4794	Inf	0.00167876	0.997315
UniRef50_A6LCQ1	3.38396	4.837	2.99443	2.15863	NA	0.00168612	0.997315
UniRef50_R7B4S0	1.79942	0.989885	1.35034	3.16016	NA	0.00168612	0.997315
UniRef50_A0A015ZA97	0.40976	0.198149	0.222223	0.241418	NA	0.00168814	0.997315
UniRef50_A0A015ZA97|unclassified	0.40976	0.198149	0.222223	0.241418	NA	0.00168814	0.997315
UniRef50_C4Z060: Endoribonuclease YbeY|g__Blautia.s__Ruminococcus_obeum	0.526377	0.180612	0.412434	0.70943	NA	0.00168814	0.997315
UniRef50_K1T7H2: Fructose-1,6-bisphosphatase (Fragment)	0.70922	0.557594	0.50949	0.670059	NA	0.00169687	0.997315
UniRef50_K1T7H2: Fructose-1,6-bisphosphatase (Fragment)|unclassified	0.70922	0.557594	0.50949	0.670059	NA	0.00169687	0.997315
UniRef50_E4SZY5: DNA-3-methyladenine glycosylase I	0.186917	0.0225654	0.0542081	0.148316	NA	0.00170387	0.997315
UniRef50_E4SZY5: DNA-3-methyladenine glycosylase I|unclassified	0.186917	0.0225654	0.0542081	0.148316	NA	0.00170387	0.997315
UniRef50_P37251: Acetolactate synthase large subunit|g__Coprococcus.s__Coprococcus_comes	2.46958	0.885016	1.15467	1.92716	NA	0.00172739	0.997315
UniRef50_R5L5P0: Putative cobalt-precorrin-6A synthase [deacetylating]	0.258466	0.175763	0.0477281	0.21204	NA	0.00172739	0.997315
UniRef50_R5L5P0: Putative cobalt-precorrin-6A synthase [deacetylating]|unclassified	0.258466	0.175763	0.0477281	0.21204	NA	0.00172739	0.997315
UniRef50_B2RH63: 3-oxoacyl-[acyl-carrier-protein] synthase 3|unclassified	0.517914	0.742054	0.675612	0.485047	NA	0.00172882	0.997315
UniRef50_S0FAY9|unclassified	0.610164	0.651493	1.21366	0.564671	-Inf	0.00173252	0.997315
UniRef50_Q0TRP8: L-serine dehydratase, iron-sulfur-dependent, alpha subunit	0.27192	0.139689	0.153481	0.195278	NA	0.00174279	0.997315
UniRef50_Q0TRP8: L-serine dehydratase, iron-sulfur-dependent, alpha subunit|unclassified	0.27192	0.139689	0.153481	0.195278	NA	0.00174279	0.997315
UniRef50_R7DVU8	0.82609	3.33383	2.37869	1.59383	NA	0.00174279	0.997315
UniRef50_C6LDA6	3.35653	4.07687	2.67682	4.33111	-Inf	0.00174279	0.997315
UniRef50_D1CST1: CMP-N-acetylneuraminic acid synthetase (Fragment)	0.38232	0.775026	1.06891	0.497094	NA	0.00174586	0.997315
UniRef50_D1CST1: CMP-N-acetylneuraminic acid synthetase (Fragment)|unclassified	0.38232	0.775026	1.06891	0.497094	NA	0.00174586	0.997315
UniRef50_F9DWF8: Response regulator	0.276984	0.101454	0.0930991	0.221426	NA	0.00175051	0.997315
UniRef50_F9DWF8: Response regulator|unclassified	0.276984	0.101454	0.0930991	0.221426	NA	0.00175051	0.997315
UniRef50_R6GWY8: S4 RNA-binding domain protein	2.66072	3.73529	3.8068	3.35024	NA	0.00175262	0.997315
UniRef50_R5RRV6	0.967675	0.83046	0.269488	1.11393	-Inf	0.00175944	0.997315
UniRef50_X1MY69: Marine sediment metagenome DNA, contig: S06H3_S11500 (Fragment)	0.242174	0.257748	0.310079	0.153691	-Inf	0.00175944	0.997315
UniRef50_X1MY69: Marine sediment metagenome DNA, contig: S06H3_S11500 (Fragment)|unclassified	0.242174	0.257748	0.310079	0.153691	-Inf	0.00175944	0.997315
UniRef50_X0Z1R1: Marine sediment metagenome DNA, contig: S01H4_C05227 (Fragment)	0.11358	0.0414294	0.0674889	0.161851	-Inf	0.00177253	0.997315
UniRef50_X0Z1R1: Marine sediment metagenome DNA, contig: S01H4_C05227 (Fragment)|unclassified	0.11358	0.0414294	0.0674889	0.161851	-Inf	0.00177253	0.997315
UniRef50_R6R3G2|unclassified	0.819737	0.972883	0.341048	0.581997	-Inf	0.00178785	0.997315
UniRef50_J9F7H5: Plasmid transfer protein (Fragment)	1.25551	0.871583	0.988777	1.27537	NA	0.00179494	0.997315
UniRef50_J9F7H5: Plasmid transfer protein (Fragment)|unclassified	1.25551	0.871583	0.988777	1.27537	NA	0.00179494	0.997315
UniRef50_D4JL53|unclassified	0.419726	0.284984	0.101166	0.461206	NA	0.00179801	0.997315
UniRef50_I4D506: Xaa-Pro aminopeptidase|g__Lachnospiraceae_noname.s__Lachnospiraceae_bacterium_7_1_58FAA	0.150673	0.173287	0.256386	0.161946	NA	0.00180716	0.997315
UniRef50_P0A324: Catalase|unclassified	0.203967	0.330124	0.328216	0.252582	NA	0.00180716	0.997315
UniRef50_C7RI48: 23S rRNA (Uracil-5-)-methyltransferase RumA|unclassified	0.550742	0.406131	0.377387	0.517701	NA	0.00182828	0.997315
UniRef50_D4JCT2: Predicted nucleic-acid-binding protein implicated in transcription termination	0.16118	0.0864306	0.214964	0.204475	NA	0.00182828	0.997315
UniRef50_D4JCT2: Predicted nucleic-acid-binding protein implicated in transcription termination|unclassified	0.16118	0.0864306	0.214964	0.204475	NA	0.00182828	0.997315
UniRef50_D7JGT5: Isoleucine--tRNA ligase	0.295914	0.366028	0.322178	0.2135	NA	0.0018399	0.997315
UniRef50_D7JGT5: Isoleucine--tRNA ligase|unclassified	0.295914	0.366028	0.322178	0.2135	NA	0.0018399	0.997315
UniRef50_F0R4T1: Integral membrane sensor hybrid histidine kinase	7.12828	4.98098	9.48281	10.4883	NA	0.0018399	0.997315
UniRef50_I9CA64: Type II secretion system protein E (Fragment)	0.683502	0.603272	0.43392	0.703652	NA	0.0018399	0.997315
UniRef50_I9CA64: Type II secretion system protein E (Fragment)|unclassified	0.683502	0.603272	0.43392	0.703652	NA	0.0018399	0.997315
UniRef50_C8PN30: FAD dependent oxidoreductase	0.308485	0.431221	0.50493	0.329246	NA	0.00184864	0.997315
UniRef50_C8PN30: FAD dependent oxidoreductase|unclassified	0.308485	0.431221	0.50493	0.329246	NA	0.00184864	0.997315
UniRef50_R6GCI1|unclassified	0.619538	0.532308	0.297457	0.562204	NA	0.00185174	0.997315
UniRef50_X1JU64: Marine sediment metagenome DNA, contig: S06H3_C01615 (Fragment)	0.479714	0.834822	0.742711	0.578448	NA	0.0018549	0.997315
UniRef50_X1JU64: Marine sediment metagenome DNA, contig: S06H3_C01615 (Fragment)|unclassified	0.479714	0.834822	0.742711	0.578448	NA	0.0018549	0.997315
UniRef50_R7JN15: Peptidase M23 family|g__Alistipes.s__Alistipes_putredinis	2.81107	3.3904	2.91159	2.39927	Inf	0.00185811	0.997315
UniRef50_K1R8C2	0.614961	1.34028	1.76293	0.781247	NA	0.00185852	0.997315
UniRef50_K1R8C2|unclassified	0.614961	1.34028	1.76293	0.781247	NA	0.00185852	0.997315
UniRef50_R5JBK0|g__Parabacteroides.s__Parabacteroides_merdae	1.01017	1.29192	2.05865	1.29332	NA	0.00185852	0.997315
UniRef50_R6PLH3	0.797061	0.426447	0.469597	0.623156	NA	0.00185852	0.997315
UniRef50_N9YAM2	1.69494	1.24438	1.26595	2.2233	NA	0.00185908	0.997315
UniRef50_X0YX64: Marine sediment metagenome DNA, contig: S01H1_S42647 (Fragment)	0.340383	0.549619	0.643549	0.443347	NA	0.00186285	0.997315
UniRef50_X0YX64: Marine sediment metagenome DNA, contig: S01H1_S42647 (Fragment)|unclassified	0.340383	0.549619	0.643549	0.443347	NA	0.00186285	0.997315
UniRef50_R6L2R0: Ribonucleoside-diphosphate reductase	0.134728	0.315847	0.301206	0.148631	Inf	0.00186479	0.997315
UniRef50_R6L2R0: Ribonucleoside-diphosphate reductase|unclassified	0.134728	0.315847	0.301206	0.148631	Inf	0.00186479	0.997315
UniRef50_Q744X6: 30S ribosomal protein S18 1|unclassified	0.259335	0.153247	0.0553863	0.208014	-Inf	0.00186479	0.997315
UniRef50_A1ALV4: 30S ribosomal protein S14 type Z	0.36008	0.379285	0.49246	0.299273	NA	0.00187498	0.997315
UniRef50_A1ALV4: 30S ribosomal protein S14 type Z|unclassified	0.36008	0.379285	0.49246	0.299273	NA	0.00187498	0.997315
UniRef50_R5MHP5	1.20103	1.91241	2.47404	0.89041	NA	0.00187498	0.997315
UniRef50_R5MHP5|unclassified	1.20103	1.91241	2.47404	0.89041	NA	0.00187498	0.997315
UniRef50_R6AY45	22.9202	14.517	22.4214	21.3422	NA	0.00187498	0.997315
UniRef50_X3FBW3	8.09267	9.85078	9.66175	7.49197	NA	0.00187498	0.997315
UniRef50_X3FBW3|unclassified	8.09267	9.85078	9.66175	7.49197	NA	0.00187498	0.997315
UniRef50_J9UNJ1: Efflux pump|g__Clostridium.s__Clostridium_bolteae	0.0756268	0.110727	0.398734	0.0891324	-Inf	0.00190153	0.997315
UniRef50_R6KYE9	1.95813	1.00894	1.23252	1.91064	NA	0.00190343	0.997315
UniRef50_R6VP05: Zn-dependent hydrolases including glyoxylases|g__Alistipes.s__Alistipes_shahii	0.673857	1.00161	1.18914	1.00781	NA	0.00191667	0.997315
UniRef50_G9RZA1|unclassified	0.652294	0.457035	0.426447	0.682885	NA	0.00191755	0.997315
UniRef50_A5GVY4: 50S ribosomal protein L17	0.0103216	0.0999924	0.0606228	0.0500405	Inf	0.00192336	0.997315
UniRef50_A5GVY4: 50S ribosomal protein L17|unclassified	0.0103216	0.0999924	0.0606228	0.0500405	Inf	0.00192336	0.997315
UniRef50_R6JM25|g__Bacteroides.s__Bacteroides_xylanisolvens	0.651053	0.450602	0.353389	0.799195	-Inf	0.00192336	0.997315
UniRef50_X1UKR5: Marine sediment metagenome DNA, contig: S12H4_S23388 (Fragment)	0.16157	0.421498	0.286585	0.180197	NA	0.00192964	0.997315
UniRef50_X1UKR5: Marine sediment metagenome DNA, contig: S12H4_S23388 (Fragment)|unclassified	0.16157	0.421498	0.286585	0.180197	NA	0.00192964	0.997315
UniRef50_D8GQ19	0.152782	0.312664	0.178992	0.13421	Inf	0.00193634	0.997315
UniRef50_D8GQ19|unclassified	0.152782	0.312664	0.178992	0.13421	Inf	0.00193634	0.997315
UniRef50_K6BT97	2.44275	3.47034	2.77255	1.61603	Inf	0.00196172	0.997315
UniRef50_R6LCT0: Glycosyltransferase group 2 family protein	0.663297	0.308484	0.317793	0.733949	NA	0.00196172	0.997315
UniRef50_T0JNK4: Cobalamin biosynthesis protein CobN	0.779627	0.244617	0.477229	0.554581	NA	0.00196172	0.997315
UniRef50_T0JNK4: Cobalamin biosynthesis protein CobN|unclassified	0.779627	0.244617	0.477229	0.554581	NA	0.00196172	0.997315
UniRef50_K2E9H1	0.142144	0.0948264	0.101179	0.264202	-Inf	0.00196375	0.997315
UniRef50_K2E9H1|unclassified	0.142144	0.0948264	0.101179	0.264202	-Inf	0.00196375	0.997315
UniRef50_H5V9V0: GDP-mannose 4,6-dehydratase	0.362909	0.572421	0.397832	0.295541	NA	0.0019777	0.997315
UniRef50_H5V9V0: GDP-mannose 4,6-dehydratase|unclassified	0.362909	0.572421	0.397832	0.295541	NA	0.0019777	0.997315
UniRef50_K1UBZ5: ECF subfamily RNA polymerase sigma-24 factor	2.02418	2.48745	2.34335	1.70302	NA	0.0019777	0.997315
UniRef50_K1UBZ5: ECF subfamily RNA polymerase sigma-24 factor|unclassified	2.02418	2.48745	2.34335	1.70302	NA	0.0019777	0.997315
UniRef50_K1SNB1: Threonine synthase (Fragment)	0.718765	1.02499	1.12777	0.63122	NA	0.00198036	0.997315
UniRef50_K1SNB1: Threonine synthase (Fragment)|unclassified	0.718765	1.02499	1.12777	0.63122	NA	0.00198036	0.997315
UniRef50_F4BBW5: Ketol-acid reductoisomerase	0.187592	0.270402	0.274631	0.160252	-Inf	0.00198036	0.997315
UniRef50_F4BBW5: Ketol-acid reductoisomerase|unclassified	0.187592	0.270402	0.274631	0.160252	-Inf	0.00198036	0.997315
UniRef50_R5JCJ3: Hydrophobe/amphiphile efflux-1 (HAE1) family RND transporter	1.7274	1.94867	1.85078	1.37248	NA	0.00198166	0.997315
UniRef50_R5JCJ3: Hydrophobe/amphiphile efflux-1 (HAE1) family RND transporter|unclassified	1.7274	1.94867	1.85078	1.37248	NA	0.00198166	0.997315
UniRef50_D3QZF7: UDP-N-acetylglucosamine 2-epimerase|g__Bacteroides.s__Bacteroides_stercoris	0.609066	0.973573	0.601813	0.266505	Inf	0.0019859	0.997315
UniRef50_D4JDI7: Growth inhibitor|g__Dorea.s__Dorea_longicatena	1.04529	0.389654	0.587079	0.78865	NA	0.00199884	0.997315
UniRef50_D4MHN5: DNA primase (Bacterial type)	38.7666	48.107	46.3282	42.2641	NA	0.00200496	0.997315
UniRef50_I3IQ03: Truncated magnesium transporter protein	0.796098	1.10173	0.971102	0.787097	NA	0.00200496	0.997315
UniRef50_I3IQ03: Truncated magnesium transporter protein|unclassified	0.796098	1.10173	0.971102	0.787097	NA	0.00200496	0.997315
UniRef50_I8WEY2|unclassified	1.25526	1.17905	1.60589	0.815669	NA	0.00202583	0.997315
UniRef50_Q038K0: tRNA (guanine-N(1)-)-methyltransferase|unclassified	0.0613383	0.215498	0.220608	0.141488	NA	0.0020274	0.997315
UniRef50_K5Z9S7	0.209066	0.597645	0.509575	0.310559	NA	0.00205266	0.997315
UniRef50_R7JQ56|g__Alistipes.s__Alistipes_shahii	0.462172	0.958078	0.909668	0.677531	Inf	0.00206318	0.997315
UniRef50_P58313: UTP--glucose-1-phosphate uridylyltransferase	0.0440024	0.0736114	0.229574	0.0775947	-Inf	0.00206318	0.997315
UniRef50_J9GV14: RsmD family RNA methyltransferase (Fragment)	1.52633	1.77697	2.01964	1.00362	NA	0.00208198	0.997315
UniRef50_J9GV14: RsmD family RNA methyltransferase (Fragment)|unclassified	1.52633	1.77697	2.01964	1.00362	NA	0.00208198	0.997315
UniRef50_R6XHB3: Excinuclease ABC subunit A	0.86432	0.872738	0.61012	0.354522	Inf	0.00208953	0.997315
UniRef50_R5CD91: Enoyl-[acyl-carrier-protein] reductase [NADH]|unclassified	1.33484	1.86084	2.33202	1.77902	NA	0.00209859	0.997315
UniRef50_R7AYQ5|unclassified	0.402667	0.537092	0.397762	0.286469	NA	0.00210521	0.997315
UniRef50_R5SG20|unclassified	0.629512	0.978219	0.943976	0.834074	-Inf	0.002106	0.997315
UniRef50_F7M6U1|g__Bacteroides.s__Bacteroides_caccae	0.985985	2.14843	1.85583	1.55124	Inf	0.00210636	0.997315
UniRef50_U3KUV3	0.265397	0.675765	0.336302	0.304818	Inf	0.00211419	0.997315
UniRef50_U3KUV3|unclassified	0.265397	0.675765	0.336302	0.304818	Inf	0.00211419	0.997315
UniRef50_U6HBJ2: 2 amino 3 ketobutyrate coenzyme A ligase|g__Akkermansia.s__Akkermansia_muciniphila	0.797572	2.60675	1.8258	0.920811	NA	0.00211419	0.997315
UniRef50_D4J5G4: Predicted oxidoreductases (Related to aryl-alcohol dehydrogenases)|g__Dorea.s__Dorea_formicigenerans	0.149902	0.171823	0.197906	0.274003	-Inf	0.00211419	0.997315
UniRef50_K6BTN4	0.238807	0.497016	0.578929	0.31811	Inf	0.00212942	0.997315
UniRef50_K6BTN4|unclassified	0.238807	0.497016	0.578929	0.31811	Inf	0.00212942	0.997315
UniRef50_A6L6F5|g__Bacteroides.s__Bacteroides_stercoris	1.51877	1.98278	3.20631	1.64691	-Inf	0.00212942	0.997315
UniRef50_G4KY28|g__Dorea.s__Dorea_formicigenerans	0.947075	0.60745	0.612321	1.21546	NA	0.0021352	0.997315
UniRef50_R7KII3: Naphthoate synthase	0.223057	0.320292	0.346593	0.207086	NA	0.0021352	0.997315
UniRef50_R7KII3: Naphthoate synthase|unclassified	0.223057	0.320292	0.346593	0.207086	NA	0.0021352	0.997315
UniRef50_C4ZEM8	18.3341	22.4953	22.4763	17.5847	NA	0.00214299	0.997315
UniRef50_D4JB78: Signal transduction histidine kinase	19.8354	23.0201	18.8749	16.778	NA	0.00214299	0.997315
UniRef50_D4LNA8: PfkB family carbohydrate kinase	1.53006	1.12732	0.913602	1.66918	NA	0.00214299	0.997315
UniRef50_K1SND3: Protein containing ABC transporter-like domain protein (Fragment)	0.838951	1.16162	1.15896	0.81367	NA	0.00214299	0.997315
UniRef50_K1SND3: Protein containing ABC transporter-like domain protein (Fragment)|unclassified	0.838951	1.16162	1.15896	0.81367	NA	0.00214299	0.997315
UniRef50_Q818F4: 30S ribosomal protein S21	0.428295	0.401898	0.407787	0.267179	NA	0.00214299	0.997315
UniRef50_Q818F4: 30S ribosomal protein S21|unclassified	0.428295	0.401898	0.407787	0.267179	NA	0.00214299	0.997315
UniRef50_G9YL28|unclassified	2.42522	2.95882	3.84458	2.65659	NA	0.00216868	0.997315
UniRef50_R7DYZ7: DNA topoisomerase type IIA subunit B region 2 domain protein|unclassified	0.368247	0.551562	0.609311	0.409669	NA	0.00217001	0.997315
UniRef50_R5UZT8: Acetylornithine deacetylase/succinyldiaminopimelate desuccinylase-like deacylase	0.38133	0.707128	0.564836	0.395003	NA	0.00218254	0.997315
UniRef50_R5UZT8: Acetylornithine deacetylase/succinyldiaminopimelate desuccinylase-like deacylase|unclassified	0.38133	0.707128	0.564836	0.395003	NA	0.00218254	0.997315
UniRef50_I0K0C5: 50S ribosomal protein L15	0.421373	0.570185	0.576146	0.189561	-Inf	0.00218747	0.997315
UniRef50_I0K0C5: 50S ribosomal protein L15|unclassified	0.421373	0.570185	0.576146	0.189561	-Inf	0.00218747	0.997315
UniRef50_R6TL66: Transporter	0.289284	0.22837	0.131303	0.255609	NA	0.00219952	0.997315
UniRef50_R6TL66: Transporter|unclassified	0.289284	0.22837	0.131303	0.255609	NA	0.00219952	0.997315
UniRef50_W4UNE4: Peptidase	0.615099	0.697002	0.793533	0.410718	-Inf	0.00222302	0.997315
UniRef50_W4UNE4: Peptidase|unclassified	0.615099	0.697002	0.793533	0.410718	-Inf	0.00222302	0.997315
UniRef50_T4J8J8: RnfC Barrel sandwich hybrid domain protein (Fragment)	0.243996	0.332986	0.3706	0.200388	NA	0.00222385	0.997315
UniRef50_T4J8J8: RnfC Barrel sandwich hybrid domain protein (Fragment)|unclassified	0.243996	0.332986	0.3706	0.200388	NA	0.00222385	0.997315
UniRef50_A5N2V1: Predicted transposase|unclassified	0.957894	0.620406	0.850623	1.26874	NA	0.00223114	0.997315
UniRef50_B0G1S2	0.568902	0.278623	0.576802	1.29097	NA	0.00223114	0.997315
UniRef50_Q7MT83: Ribose-phosphate pyrophosphokinase|g__Alistipes.s__Alistipes_putredinis	4.02774	4.91953	4.01886	3.4355	Inf	0.00223975	0.997315
UniRef50_R6K692|g__Bacteroides.s__Bacteroides_caccae	1.16487	1.52998	1.30119	1.15758	Inf	0.00225004	0.997315
UniRef50_R5CWB5: DNA-binding helix-turn-helix protein	3.77992	5.17535	4.46604	3.63689	NA	0.00226848	0.997315
UniRef50_U2K9Y6: ParB-like protein (Fragment)	0.474281	0.876346	0.655429	0.555256	Inf	0.00227046	0.997315
UniRef50_D4J6B4: Predicted metal-dependent phosphoesterases (PHP family)	1.52143	2.42444	1.90879	1.66687	NA	0.0022895	0.997315
UniRef50_R6LB29: Cobalamin synthase	3.48487	2.56657	2.32411	3.31474	NA	0.0022895	0.997315
UniRef50_R6NPY4	4.42564	3.16237	4.13154	5.14751	NA	0.0022895	0.997315
UniRef50_R6RP99: High-affinity branched-chain amino acid transport system permeaseprotein BraE	1.50403	1.90701	1.74876	1.28508	NA	0.0022895	0.997315
UniRef50_R6RP99: High-affinity branched-chain amino acid transport system permeaseprotein BraE|unclassified	1.50403	1.90701	1.74876	1.28508	NA	0.0022895	0.997315
UniRef50_R7L0G8: 1 4-alpha-glucan branching enzyme GlgB	0.865153	1.05541	1.14252	0.941829	NA	0.0022895	0.997315
UniRef50_R7L0G8: 1 4-alpha-glucan branching enzyme GlgB|unclassified	0.865153	1.05541	1.14252	0.941829	NA	0.0022895	0.997315
UniRef50_R7AS32: Thioredoxin	0.210977	0.172179	0.103143	0.239456	-Inf	0.00230068	0.997315
UniRef50_R7AS32: Thioredoxin|unclassified	0.210977	0.172179	0.103143	0.239456	-Inf	0.00230068	0.997315
UniRef50_R5CBJ9: AcrB/AcrD/AcrF family protein	0.502174	0.595055	0.604252	0.428911	Inf	0.00231312	0.997315
UniRef50_R5CBJ9: AcrB/AcrD/AcrF family protein|unclassified	0.502174	0.595055	0.604252	0.428911	Inf	0.00231312	0.997315
UniRef50_T2YY09: Putative methyltransferase	0.20455	0.155943	0.166132	0.293559	-Inf	0.00231312	0.997315
UniRef50_T2YY09: Putative methyltransferase|unclassified	0.20455	0.155943	0.166132	0.293559	-Inf	0.00231312	0.997315
UniRef50_I4D8V6: Geranylgeranyl pyrophosphate synthase	0.208798	0.3485	0.414094	0.190116	NA	0.00232236	0.997315
UniRef50_I4D8V6: Geranylgeranyl pyrophosphate synthase|unclassified	0.208798	0.3485	0.414094	0.190116	NA	0.00232236	0.997315
UniRef50_Q9S1B7: Cold shock-like protein CspA|g__Blautia.s__Ruminococcus_torques	2.28848	1.14363	1.17664	1.46769	NA	0.00233895	0.997315
UniRef50_R6N0M2	0.439891	0.287945	0.486177	0.460395	-Inf	0.00233895	0.997315
UniRef50_R5EZX5|g__Dorea.s__Dorea_formicigenerans	0.18404	0.114929	0.211401	0.375046	NA	0.00236409	0.997315
UniRef50_K1U2Z6: Oxaloacetate decarboxylase (Fragment)	0.425908	0.599548	1.01165	0.440077	-Inf	0.00236409	0.997315
UniRef50_K1U2Z6: Oxaloacetate decarboxylase (Fragment)|unclassified	0.425908	0.599548	1.01165	0.440077	-Inf	0.00236409	0.997315
UniRef50_E6UDR7: CDP-alcohol phosphatidyltransferase|unclassified	0.276475	0.523673	0.598408	0.510656	Inf	0.00236832	0.997315
UniRef50_A9KMU9: tRNA-2-methylthio-N(6)-dimethylallyladenosine synthase|g__Blautia.s__Ruminococcus_torques	1.0811	0.737366	0.680928	0.802277	NA	0.00237132	0.997315
UniRef50_C3Q758|unclassified	3.88387	2.28554	2.88862	3.88491	NA	0.00237132	0.997315
UniRef50_Q5L7M0: 30S ribosomal protein S15|unclassified	0.696162	1.02779	1.05322	0.672314	NA	0.00237951	0.997315
UniRef50_B3EUM2: 50S ribosomal protein L4|g__Alistipes.s__Alistipes_putredinis	3.67912	4.61829	3.78484	3.14259	Inf	0.00238213	0.997315
UniRef50_B9KB48: Xanthine/uracil/vitamin C permease|unclassified	0.371515	0.235376	0.116583	0.231956	NA	0.00239229	0.997315
UniRef50_A1T8W3: Imidazoleglycerol-phosphate dehydratase|g__Roseburia.s__Roseburia_intestinalis	0.465045	0.139896	0.645015	0.842089	NA	0.00239384	0.997315
UniRef50_R5VA88	2.40728	1.28013	1.50717	3.48257	-Inf	0.00239384	0.997315
UniRef50_R5VA88|unclassified	2.40728	1.28013	1.50717	3.48257	-Inf	0.00239384	0.997315
UniRef50_W4PCT0: 6-phosphofructokinase	0.386961	0.462591	0.735883	0.51276	NA	0.00241101	0.997315
UniRef50_W4PCT0: 6-phosphofructokinase|unclassified	0.386961	0.462591	0.735883	0.51276	NA	0.00241101	0.997315
UniRef50_D3AMV2|unclassified	0.246585	0.551371	0.555261	0.207249	-Inf	0.00241436	0.997315
UniRef50_S7WIZ5: 3-oxoacyl-[acyl-carrier-protein] synthase, KASIII	0.531906	0.695094	0.601562	0.45847	NA	0.0024424	0.997315
UniRef50_S7WIZ5: 3-oxoacyl-[acyl-carrier-protein] synthase, KASIII|unclassified	0.531906	0.695094	0.601562	0.45847	NA	0.0024424	0.997315
UniRef50_Q01S06	1.71187	2.51328	2.3865	2.26086	NA	0.00244493	0.997315
UniRef50_UPI000365ED81: hypothetical protein	1.07194	1.29651	1.32918	1.22045	NA	0.00244493	0.997315
UniRef50_UPI000365ED81: hypothetical protein|unclassified	1.07194	1.29651	1.32918	1.22045	NA	0.00244493	0.997315
UniRef50_F7L7G5|g__Bacteroides.s__Bacteroides_ovatus	3.12195	4.51005	9.94446	10.2625	NA	0.00244964	0.997315
UniRef50_R6JBA3: Carboxynorspermidine decarboxylase|unclassified	0.115087	0.407355	0.492622	0.240518	NA	0.00244991	0.997315
UniRef50_R5JML8: Peptidase family U32|unclassified	0.332497	0.550435	0.675993	0.579904	Inf	0.00246703	0.997315
UniRef50_D6E017: Type IV secretory pathway, VirD4 components|g__Dorea.s__Dorea_formicigenerans	4.71823	3.09686	3.45403	4.78651	NA	0.0024853	0.997315
UniRef50_D4KQG4: Flagellar biosynthesis/type III secretory pathway protein	0.713697	0.227883	0.66933	0.914149	NA	0.00248642	0.997315
UniRef50_D7GRS5: Predicted DNA-binding proteins	0.400089	0.169409	0.180781	0.498873	NA	0.00249084	0.997315
UniRef50_D7GRS5: Predicted DNA-binding proteins|unclassified	0.400089	0.169409	0.180781	0.498873	NA	0.00249084	0.997315
UniRef50_R5GVW6	0.376246	0.344071	0.0806895	0.420272	NA	0.00250678	0.997315
UniRef50_UPI0003679186: hypothetical protein	3.48184	4.5815	4.09618	2.46919	NA	0.00251953	0.997315
UniRef50_UPI0003679186: hypothetical protein|unclassified	3.48184	4.5815	4.09618	2.46919	NA	0.00251953	0.997315
UniRef50_N2APM1	0.255204	0.185259	0.109557	0.253716	NA	0.00252014	0.997315
UniRef50_N2APM1|unclassified	0.255204	0.185259	0.109557	0.253716	NA	0.00252014	0.997315
UniRef50_R6M144: Thiol-disulfide isomerase and thioredoxins|g__Coprococcus.s__Coprococcus_comes	0.878085	0.496253	0.508755	0.675715	NA	0.00252014	0.997315
UniRef50_I3YMR9: Glycerol-3-phosphate dehydrogenase|g__Alistipes.s__Alistipes_putredinis	3.81992	4.49205	3.41081	2.95596	Inf	0.00253274	0.997315
UniRef50_R6G3F7: Two component transcriptional regulator LuxR family|g__Alistipes.s__Alistipes_putredinis	3.32445	4.13696	3.14426	2.61797	Inf	0.00253274	0.997315
UniRef50_R7JMH7: ParB-like protein|g__Alistipes.s__Alistipes_putredinis	3.15119	3.38418	2.78438	2.22755	Inf	0.00253274	0.997315
UniRef50_H1DC99	0.0864821	0.293697	0.225903	0.179194	Inf	0.0025439	0.997315
UniRef50_H1DC99|unclassified	0.0864821	0.293697	0.225903	0.179194	Inf	0.0025439	0.997315
UniRef50_K7SCJ6: 50S ribosomal protein L31|unclassified	0.140127	0.249823	0.164557	0.0720942	Inf	0.00254601	0.997315
UniRef50_C7G6W8|g__Roseburia.s__Roseburia_intestinalis	0.272655	0.103123	0.391984	0.422848	NA	0.00254601	0.997315
UniRef50_I7HJC7: Thymidine kinase	0.233813	0.148525	0.0871327	0.179203	NA	0.00255271	0.997315
UniRef50_I7HJC7: Thymidine kinase|unclassified	0.233813	0.148525	0.0871327	0.179203	NA	0.00255271	0.997315
UniRef50_A0REB6: 3D-(3,5/4)-trihydroxycyclohexane-1,2-dione hydrolase|unclassified	0.429131	0.59048	0.809992	0.387467	-Inf	0.00256169	0.997315
UniRef50_A5D3G2	0.270171	0.38016	0.486045	0.248482	NA	0.00256481	0.997315
UniRef50_A5D3G2|unclassified	0.270171	0.38016	0.486045	0.248482	NA	0.00256481	0.997315
UniRef50_R6KHS0|g__Bacteroides.s__Bacteroides_stercoris	7.00522	8.73264	7.71999	7.59155	NA	0.00258852	0.997315
UniRef50_R7DYM7: Aspartokinase	0.650816	2.97541	2.06022	0.987735	NA	0.00259111	0.997315
UniRef50_X2M8F4: Cytochrome d terminal oxidase subunit 1	0.24216	0.330789	0.263929	0.211073	NA	0.00259111	0.997315
UniRef50_X2M8F4: Cytochrome d terminal oxidase subunit 1|unclassified	0.24216	0.330789	0.263929	0.211073	NA	0.00259111	0.997315
UniRef50_J9FFX9: C4-dicarboxylate anaerobic carrier-like protein (Fragment)	0.0916662	0.443885	0.479947	0.322412	Inf	0.00260796	0.997315
UniRef50_J9FFX9: C4-dicarboxylate anaerobic carrier-like protein (Fragment)|unclassified	0.0916662	0.443885	0.479947	0.322412	Inf	0.00260796	0.997315
UniRef50_B5DC81: UDP-glucose 4-epimerase (Fragment)	1.3402	1.70253	1.62736	1.49477	NA	0.00260976	0.997315
UniRef50_B5DC81: UDP-glucose 4-epimerase (Fragment)|unclassified	1.3402	1.70253	1.62736	1.49477	NA	0.00260976	0.997315
UniRef50_R5QJS5: Conserved domain protein	4.7592	2.86502	3.49881	4.02137	NA	0.00260976	0.997315
UniRef50_D4JMM4: DNA repair proteins|g__Dorea.s__Dorea_formicigenerans	2.77648	1.7569	1.09855	1.9166	NA	0.00262012	0.997315
UniRef50_C8VX22: Transcriptional regulator, ArsR family	0.17986	0.062192	0.101894	0.181181	NA	0.00262296	0.997315
UniRef50_R6CQT0: Chaperone ClpB|g__Flavonifractor.s__Flavonifractor_plautii	0.303573	0.257752	0.225706	0.495964	NA	0.00263402	0.997315
UniRef50_R5S2T3: Alpha-glucan phosphorylase|unclassified	0.892228	0.577149	0.317737	0.206871	Inf	0.00264637	0.997315
UniRef50_R5EMZ7: 4-hydroxy-3-methylbut-2-en-1-yl diphosphate synthase|unclassified	0.251232	0.325078	0.282432	0.189261	NA	0.00264637	0.997315
UniRef50_R6YSN8|unclassified	0.381916	0.467946	0.641041	0.464532	Inf	0.00265051	0.997315
UniRef50_T0UFE6: Transposase	0.455686	0.270112	0.368979	0.526654	NA	0.0026559	0.997315
UniRef50_T0UFE6: Transposase|unclassified	0.455686	0.270112	0.368979	0.526654	NA	0.0026559	0.997315
UniRef50_D3I6D0: DNA polymerase III, alpha subunit|unclassified	0.638435	0.75846	0.478048	0.340091	NA	0.00267111	0.997315
UniRef50_A3DG89: DNA mismatch endonuclease Vsr|unclassified	0.636423	0.334076	0.336657	0.444273	NA	0.0026818	0.997315
UniRef50_K1SQ36: Malonyl CoA-acyl carrier protein transacylase (Fragment)	0.723002	0.957628	0.995125	1.53575	NA	0.00268519	0.997315
UniRef50_K1SQ36: Malonyl CoA-acyl carrier protein transacylase (Fragment)|unclassified	0.723002	0.957628	0.995125	1.53575	NA	0.00268519	0.997315
UniRef50_R7C7I8: Transposase	0.960983	0.625651	0.828587	1.33753	NA	0.00268519	0.997315
UniRef50_R7C7I8: Transposase|unclassified	0.960983	0.625651	0.828587	1.33753	NA	0.00268519	0.997315
UniRef50_R6IG06|g__Parabacteroides.s__Parabacteroides_merdae	0.899618	1.21204	1.99978	1.59864	NA	0.00268677	0.997315
UniRef50_B0MX37	2.77854	3.1048	3.28949	2.5188	Inf	0.00269202	0.997315
UniRef50_B0MX37|g__Alistipes.s__Alistipes_putredinis	2.77854	3.1048	3.28949	2.5188	Inf	0.00269202	0.997315
UniRef50_L6QU43: L-fucose isomerase	0.18212	0.306115	0.218574	0.173578	Inf	0.00270426	0.997315
UniRef50_L6QU43: L-fucose isomerase|unclassified	0.18212	0.306115	0.218574	0.173578	Inf	0.00270426	0.997315
UniRef50_R6XBJ7|g__Bacteroides.s__Bacteroides_caccae	0.997804	1.21139	1.12049	0.998981	Inf	0.00270698	0.997315
UniRef50_M1ZVZ6: Putative R-2-hydroxyglutaryl-CoA dehydratase subunit (Fragment)	0.253352	0.184063	0.0624669	0.417153	-Inf	0.00271768	0.997315
UniRef50_M1ZVZ6: Putative R-2-hydroxyglutaryl-CoA dehydratase subunit (Fragment)|unclassified	0.253352	0.184063	0.0624669	0.417153	-Inf	0.00271768	0.997315
UniRef50_W4V171: 3-dehydroquinate synthase	0.65518	0.569199	0.590852	0.324069	-Inf	0.00271768	0.997315
UniRef50_W4V171: 3-dehydroquinate synthase|unclassified	0.65518	0.569199	0.590852	0.324069	-Inf	0.00271768	0.997315
UniRef50_T3KWC6: Flavodoxin family protein	0.156789	0.194164	0.340397	0.144422	-Inf	0.0027338	0.997315
UniRef50_T3KWC6: Flavodoxin family protein|unclassified	0.156789	0.194164	0.340397	0.144422	-Inf	0.0027338	0.997315
UniRef50_F3BBE4: Malonyl CoA-acyl carrier protein transacylase|g__Dorea.s__Dorea_formicigenerans	0.180712	0.132776	0.373617	0.451688	NA	0.00275336	0.997315
UniRef50_X1GUN5: Marine sediment metagenome DNA, contig: S03H2_S02437 (Fragment)	0.370845	0.47595	0.519182	0.346275	NA	0.00275336	0.997315
UniRef50_X1GUN5: Marine sediment metagenome DNA, contig: S03H2_S02437 (Fragment)|unclassified	0.370845	0.47595	0.519182	0.346275	NA	0.00275336	0.997315
UniRef50_UPI00040241F5: hypothetical protein	0.232357	0.153001	0.169028	0.207545	NA	0.00275657	0.997315
UniRef50_UPI00040241F5: hypothetical protein|unclassified	0.232357	0.153001	0.169028	0.207545	NA	0.00275657	0.997315
UniRef50_R6EYG6	1.01379	0.565329	0.767724	0.807546	NA	0.00276876	0.997315
UniRef50_R7DD68: 30S ribosomal protein S13|g__Dorea.s__Dorea_formicigenerans	0.95375	0.595093	0.765266	1.3791	NA	0.00276915	0.997315
UniRef50_B2UP55: Hydroxyethylthiazole kinase	0.475165	2.70083	1.57841	0.682108	Inf	0.00277527	0.997315
UniRef50_Q1Q4Z7: 2,3-bisphosphoglycerate-dependent phosphoglycerate mutase	0.155168	0.303723	0.268667	0.166835	Inf	0.00277527	0.997315
UniRef50_Q1Q4Z7: 2,3-bisphosphoglycerate-dependent phosphoglycerate mutase|unclassified	0.155168	0.303723	0.268667	0.166835	Inf	0.00277527	0.997315
UniRef50_A7VU68: ABC transporter, permease protein	0.196745	0.127737	0.173306	0.259254	NA	0.00277527	0.997315
UniRef50_R6A1D6: Heat-inducible transcription repressor hrcA	0.494806	0.238142	0.6131	0.957336	NA	0.00277527	0.997315
UniRef50_D4JZQ9: CRISPR-associated protein, Csd5d family|g__Lachnospiraceae_noname.s__Lachnospiraceae_bacterium_7_1_58FAA	0.0942968	0.153981	0.420477	0.227285	Inf	0.00278341	0.997315
UniRef50_R7GYR7: Acyl-[acyl-carrier-protein]-UDP-N-acetylglucosami ne O-acyltransferase|unclassified	1.04475	1.10969	1.09298	0.685601	NA	0.00278341	0.997315
UniRef50_H1LUL0	2.22431	2.73387	2.70049	2.23903	NA	0.00278448	0.997315
UniRef50_H1LUL0|unclassified	2.22431	2.73387	2.70049	2.23903	NA	0.00278448	0.997315
UniRef50_UPI00047E5527: hypothetical protein	0.894901	1.04312	1.40763	0.952194	NA	0.00278448	0.997315
UniRef50_UPI00047E5527: hypothetical protein|unclassified	0.894901	1.04312	1.40763	0.952194	NA	0.00278448	0.997315
UniRef50_X1H780: Marine sediment metagenome DNA, contig: S03H2_S00111 (Fragment)	0.804926	0.953461	0.984402	0.806755	NA	0.00278448	0.997315
UniRef50_X1H780: Marine sediment metagenome DNA, contig: S03H2_S00111 (Fragment)|unclassified	0.804926	0.953461	0.984402	0.806755	NA	0.00278448	0.997315
UniRef50_G2T1J4	0.700604	1.81003	0.907069	0.416894	NA	0.00278785	0.997315
UniRef50_R9K8D8	0.174897	0.142403	0.104831	0.227416	NA	0.00279764	0.997315
UniRef50_R9K8D8|unclassified	0.174897	0.142403	0.104831	0.227416	NA	0.00279764	0.997315
UniRef50_A6L881: Ferritin A|unclassified	0.583022	0.744792	0.792884	0.459782	NA	0.00280378	0.997315
UniRef50_W6PCQ5	0.413858	0.381614	0.175896	0.652143	-Inf	0.00280378	0.997315
UniRef50_W6PCQ5|unclassified	0.413858	0.381614	0.175896	0.652143	-Inf	0.00280378	0.997315
UniRef50_B6YRK8: Shikimate 5-dehydrogenase|unclassified	0.463736	0.739093	0.667158	0.377197	Inf	0.00281789	0.997315
UniRef50_F0R2H5: RagB/SusD domain-containing protein|g__Bacteroides.s__Bacteroides_xylanisolvens	0.512204	0.55506	0.213825	0.246172	NA	0.00281789	0.997315
UniRef50_R5I2A5|g__Bacteroides.s__Bacteroides_vulgatus	3.41198	2.4347	2.36053	5.4138	NA	0.00281789	0.997315
UniRef50_R7ESQ2	0.554824	0.220567	0.619647	0.83434	NA	0.00281789	0.997315
UniRef50_R7ESQ2|unclassified	0.554824	0.220567	0.619647	0.83434	NA	0.00281789	0.997315
UniRef50_R5CG88|unclassified	0.3618	0.501349	0.471314	0.318632	NA	0.00282038	0.997315
UniRef50_R5MKU5	0.581923	1.5152	1.34181	1.07477	NA	0.00282038	0.997315
UniRef50_R6MQK4	0.981635	1.95723	1.95275	1.2574	NA	0.00282038	0.997315
UniRef50_B0G1S2|g__Dorea.s__Dorea_formicigenerans	0.428365	0.184536	0.395049	1.02328	NA	0.00283791	0.997315
UniRef50_R6NQR2|g__Blautia.s__Ruminococcus_obeum	5.68835	6.6297	9.7858	4.24066	-Inf	0.00284757	0.997315
UniRef50_S0NIH1	0.0299046	0.174864	0.184338	0.183792	NA	0.0028507	0.997315
UniRef50_S0NIH1|unclassified	0.0299046	0.174864	0.184338	0.183792	NA	0.0028507	0.997315
UniRef50_R7DW31|g__Akkermansia.s__Akkermansia_muciniphila	0.685268	3.0525	1.83994	0.90055	Inf	0.00285078	0.997315
UniRef50_R7AIE6: Ribonuclease 3	0.66733	1.0136	0.936983	0.702334	NA	0.00285291	0.997315
UniRef50_R7AIE6: Ribonuclease 3|unclassified	0.66733	1.0136	0.936983	0.702334	NA	0.00285291	0.997315
UniRef50_D3ICU3|g__Alistipes.s__Alistipes_putredinis	3.28175	3.80047	3.20558	2.75834	Inf	0.00286041	0.997315
UniRef50_A6LFY2|unclassified	0.295334	0.552287	0.558557	0.283108	NA	0.00286041	0.997315
UniRef50_Q3EJV5: ABC transporter ATP-binding protein	0.0945531	0.19077	0.297827	0.162358	NA	0.00286041	0.997315
UniRef50_Q3EJV5: ABC transporter ATP-binding protein|unclassified	0.0945531	0.19077	0.297827	0.162358	NA	0.00286041	0.997315
UniRef50_A6LBH5	1.36751	1.54848	1.65342	0.924274	-Inf	0.00286041	0.997315
UniRef50_I9EGF1	1.3356	0.521507	0.699449	1.45066	NA	0.00286979	0.997315
UniRef50_I9EGF1|unclassified	1.3356	0.521507	0.699449	1.45066	NA	0.00286979	0.997315
UniRef50_R5SBS4: Glycosyl hydrolase family 3 C terminal domain-containing protein|unclassified	0.271657	0.373814	0.69237	0.564506	NA	0.0028738	0.997315
UniRef50_A6LBI8	1.91456	1.22319	1.03201	1.10266	NA	0.0028772	0.997315
UniRef50_C4ZA36: Cell division protein SepF|unclassified	0.661056	0.453238	0.35536	1.02797	-Inf	0.0028772	0.997315
UniRef50_X0YNS7: Marine sediment metagenome DNA, contig: S01H1_S36998 (Fragment)	0.198847	0.425039	0.492364	0.369418	-Inf	0.0028772	0.997315
UniRef50_X0YNS7: Marine sediment metagenome DNA, contig: S01H1_S36998 (Fragment)|unclassified	0.198847	0.425039	0.492364	0.369418	-Inf	0.0028772	0.997315
UniRef50_R5KHE4	0.643056	0.843067	0.970248	0.590714	-Inf	0.00289367	0.997315
UniRef50_R5KHE4|unclassified	0.643056	0.843067	0.970248	0.590714	-Inf	0.00289367	0.997315
UniRef50_R5NID2	0.85351	1.14138	1.71007	1.10011	NA	0.00293391	0.997315
UniRef50_A7VU68: ABC transporter, permease protein|g__Clostridium.s__Clostridium_leptum	0.196745	0.127737	0.115856	0.24973	NA	0.00295234	0.997315
UniRef50_A6L8Z5: AcrB/AcrD family multidrug resistance protein|unclassified	1.50375	1.77157	1.39899	1.04476	NA	0.00296959	0.997315
UniRef50_K1T8H8: Deoxyguanosinetriphosphate triphosphohydrolase-like protein (Fragment)	1.07425	1.37355	1.3802	1.40484	NA	0.00296959	0.997315
UniRef50_K1T8H8: Deoxyguanosinetriphosphate triphosphohydrolase-like protein (Fragment)|unclassified	1.07425	1.37355	1.3802	1.40484	NA	0.00296959	0.997315
UniRef50_U4ZHD3: RNA polymerase Rpb3/Rpb11 dimerization domain protein	1.68549	2.1205	2.2574	1.74011	NA	0.00296959	0.997315
UniRef50_U4ZHD3: RNA polymerase Rpb3/Rpb11 dimerization domain protein|unclassified	1.68549	2.1205	2.2574	1.74011	NA	0.00296959	0.997315
UniRef50_Q3B2U3: Gamma-glutamyl phosphate reductase|unclassified	0.206824	0.322185	0.270504	0.164803	Inf	0.00298347	0.997315
UniRef50_X1BVH3: Marine sediment metagenome DNA, contig: S01H4_L08914 (Fragment)	0.262606	0.387786	0.378445	0.246706	NA	0.0029941	0.997315
UniRef50_X1BVH3: Marine sediment metagenome DNA, contig: S01H4_L08914 (Fragment)|unclassified	0.262606	0.387786	0.378445	0.246706	NA	0.0029941	0.997315
UniRef50_C4GD21: ATPase/histidine kinase/DNA gyrase B/HSP90 domain protein	0.206134	0.164038	0.131627	0.253134	NA	0.00299823	0.997315
UniRef50_C4GD21: ATPase/histidine kinase/DNA gyrase B/HSP90 domain protein|unclassified	0.206134	0.164038	0.131627	0.253134	NA	0.00299823	0.997315
UniRef50_W4PK35: NADP-dependent malic enzyme|unclassified	0.947026	1.27806	1.12838	0.835257	NA	0.00300711	0.997315
UniRef50_R5KR54: Conserved domain protein	0.507702	0.148582	0.148263	0.483106	NA	0.00301596	0.997315
UniRef50_R5ME75|g__Bacteroides.s__Bacteroides_uniformis	2.38844	2.04691	1.80671	3.06894	NA	0.00301596	0.997315
UniRef50_E5UWC2: Transposase|unclassified	0.437964	0.48373	1.32522	0.628626	NA	0.00302264	0.997315
UniRef50_Q5M0P7: Bifunctional protein FolD|g__Alistipes.s__Alistipes_putredinis	2.85109	3.46462	2.86896	2.47893	Inf	0.00303836	0.997315
UniRef50_R7B4S0|g__Roseburia.s__Roseburia_inulinivorans	1.36075	0.756938	1.11314	2.82425	-Inf	0.00304993	0.997315
UniRef50_K1SMF6	0.877709	0.578341	0.529452	0.855338	NA	0.00305299	0.997315
UniRef50_K1SMF6|unclassified	0.877709	0.578341	0.529452	0.855338	NA	0.00305299	0.997315
UniRef50_R6IVQ3: Putative sigma E regulatory protein MucB/RseB	0.59121	2.79557	2.0504	0.957133	Inf	0.00305714	0.997315
UniRef50_C6PVV6: Glycine reductase	0.235191	0.176106	0.132304	0.242434	NA	0.00307214	0.997315
UniRef50_C6PVV6: Glycine reductase|unclassified	0.235191	0.176106	0.132304	0.242434	NA	0.00307214	0.997315
UniRef50_R5V7T8	0.556404	0.595682	0.553846	0.391546	NA	0.00307214	0.997315
UniRef50_R5V7T8|unclassified	0.556404	0.595682	0.553846	0.391546	NA	0.00307214	0.997315
UniRef50_Q2NJM1: DNA gyrase subunit B	0.164435	0.266503	0.218771	0.159158	-Inf	0.00309143	0.997315
UniRef50_Q2NJM1: DNA gyrase subunit B|unclassified	0.164435	0.266503	0.218771	0.159158	-Inf	0.00309143	0.997315
UniRef50_R5UNS1	1.90083	1.17167	0.687897	2.07336	-Inf	0.00309437	0.997315
UniRef50_R5UNS1|unclassified	1.90083	1.17167	0.687897	2.07336	-Inf	0.00309437	0.997315
UniRef50_C0ETK9|unclassified	0.897408	0.414885	0.748728	0.852845	NA	0.00311381	0.997315
UniRef50_A6P0L9|g__Lachnospiraceae_noname.s__Lachnospiraceae_bacterium_7_1_58FAA	0.175156	0.333925	0.411948	0.300937	NA	0.00313615	0.997315
UniRef50_C9DF41	0.704822	0.943442	0.956855	1.71217	NA	0.00313965	0.997315
UniRef50_C9DF41|unclassified	0.704822	0.943442	0.956855	1.71217	NA	0.00313965	0.997315
UniRef50_D3AEI2: Polysaccharide deacetylase	0.308648	0.123738	0.147868	0.213743	NA	0.00313965	0.997315
UniRef50_K1SNM1	1.34193	0.807626	1.0989	1.83737	NA	0.00313965	0.997315
UniRef50_K1SNM1|unclassified	1.34193	0.807626	1.0989	1.83737	NA	0.00313965	0.997315
UniRef50_P58313: UTP--glucose-1-phosphate uridylyltransferase|unclassified	0.0440024	0.0736114	0.207676	0.0700998	-Inf	0.00313965	0.997315
UniRef50_R7NNG5: Phosphatidylserine decarboxylase	0.282686	0.198891	0.133142	0.299306	-Inf	0.00314382	0.997315
UniRef50_C0BEB7|g__Dorea.s__Dorea_formicigenerans	1.3329	0.897284	1.11996	1.79509	-Inf	0.00314636	0.997315
UniRef50_B0P8U1	1.60497	1.65091	1.69859	1.32016	NA	0.00316562	0.997315
UniRef50_F4LJY5: Xenobiotic-transporting ATPase|unclassified	0.919434	1.19249	1.1073	0.864788	NA	0.00316562	0.997315
UniRef50_K1TXU8: Protein containing ABC transporter-like domain protein	1.25263	1.68362	1.72431	1.45099	NA	0.00316562	0.997315
UniRef50_K1TXU8: Protein containing ABC transporter-like domain protein|unclassified	1.25263	1.68362	1.72431	1.45099	NA	0.00316562	0.997315
UniRef50_R5XC68: Transcriptional regulator BadM/Rrf2 family	6.22085	4.07517	5.08528	6.17655	NA	0.00316562	0.997315
UniRef50_R6IYM1: Threonine aldolase	4.22902	6.03669	5.79736	4.62818	NA	0.00316562	0.997315
UniRef50_X1HY08: Marine sediment metagenome DNA, contig: S03H2_S04834 (Fragment)	1.09712	1.33079	1.16492	1.04955	NA	0.00316562	0.997315
UniRef50_X1HY08: Marine sediment metagenome DNA, contig: S03H2_S04834 (Fragment)|unclassified	1.09712	1.33079	1.16492	1.04955	NA	0.00316562	0.997315
UniRef50_R7A9Y0: Altronate dehydratase	0.565126	0.401935	0.470105	0.659763	NA	0.00317754	0.997315
UniRef50_R7A9Y0: Altronate dehydratase|unclassified	0.565126	0.401935	0.470105	0.659763	NA	0.00317754	0.997315
UniRef50_R7BCW5	0.412001	0.769542	0.584053	0.33115	NA	0.00317754	0.997315
UniRef50_R7BCW5|unclassified	0.412001	0.769542	0.584053	0.33115	NA	0.00317754	0.997315
UniRef50_X0ZMQ7: Marine sediment metagenome DNA, contig: S01H1_S35777 (Fragment)	0.204212	0.333557	0.305094	0.207024	NA	0.00317754	0.997315
UniRef50_X0ZMQ7: Marine sediment metagenome DNA, contig: S01H1_S35777 (Fragment)|unclassified	0.204212	0.333557	0.305094	0.207024	NA	0.00317754	0.997315
UniRef50_K1UFU0: Succinate dehydrogenase or fumarate reductase, flavoprotein subunit (Fragment)	0.588564	0.62166	0.560712	0.351632	NA	0.00319118	0.997315
UniRef50_K1UFU0: Succinate dehydrogenase or fumarate reductase, flavoprotein subunit (Fragment)|unclassified	0.588564	0.62166	0.560712	0.351632	NA	0.00319118	0.997315
UniRef50_B2UP77: PUR-alpha/beta/gamma DNA/RNA-binding	0.974304	5.16267	3.37231	1.42082	Inf	0.00319174	0.997315
UniRef50_B2UP77: PUR-alpha/beta/gamma DNA/RNA-binding|g__Akkermansia.s__Akkermansia_muciniphila	0.974304	5.16267	3.37231	1.42082	Inf	0.00319174	0.997315
UniRef50_K2CI84: Selenocysteine lyase (Fragment)	0.0940228	0.230157	0.214195	0.0880096	NA	0.00319174	0.997315
UniRef50_K2CI84: Selenocysteine lyase (Fragment)|unclassified	0.0940228	0.230157	0.214195	0.0880096	NA	0.00319174	0.997315
UniRef50_X1PAW4: Marine sediment metagenome DNA, contig: S06H3_S15458 (Fragment)	0.237286	0.396803	0.345728	0.20786	NA	0.00320106	0.997315
UniRef50_X1PAW4: Marine sediment metagenome DNA, contig: S06H3_S15458 (Fragment)|unclassified	0.237286	0.396803	0.345728	0.20786	NA	0.00320106	0.997315
UniRef50_E5UWC2: Transposase	0.495944	0.48373	1.32522	0.628626	NA	0.00320748	0.997315
UniRef50_C9DE23: Phosphofructokinase (Fragment)	0.450287	0.562723	0.50921	1.13246	NA	0.0032114	0.997315
UniRef50_C9DE23: Phosphofructokinase (Fragment)|unclassified	0.450287	0.562723	0.50921	1.13246	NA	0.0032114	0.997315
UniRef50_K1TBX9: ATPase component of ABC transporters with duplicated ATPase domain protein (Fragment)	0.721568	0.446705	0.445606	0.505473	NA	0.00321336	0.997315
UniRef50_K1TBX9: ATPase component of ABC transporters with duplicated ATPase domain protein (Fragment)|unclassified	0.721568	0.446705	0.445606	0.505473	NA	0.00321336	0.997315
UniRef50_R7FU49: Cell shape determining protein MreB/Mrl family|g__Coprococcus.s__Coprococcus_comes	0.757763	0.384868	0.36462	0.494657	NA	0.00322059	0.997315
UniRef50_R6Z1Z6: M18 family aminopeptidase	0.300514	0.260382	0.136013	0.301959	NA	0.00322635	0.997315
UniRef50_R6Z1Z6: M18 family aminopeptidase|unclassified	0.300514	0.260382	0.136013	0.301959	NA	0.00322635	0.997315
UniRef50_S0FBY6: Peptidase family M49 (Fragment)|unclassified	0.734066	0.819937	0.704102	0.530219	NA	0.00322635	0.997315
UniRef50_R6UMY8: Cadmium efflux system accessory protein	0.0998077	0.277775	0.249401	0.143613	Inf	0.00324729	0.997315
UniRef50_R6UMY8: Cadmium efflux system accessory protein|unclassified	0.0998077	0.277775	0.249401	0.143613	Inf	0.00324729	0.997315
UniRef50_B7B7Y5: Putative ribulose-phosphate 3-epimerase	0.492252	0.918153	0.443023	0.322061	NA	0.0032606	0.997315
UniRef50_B7B7Y5: Putative ribulose-phosphate 3-epimerase|unclassified	0.492252	0.918153	0.443023	0.322061	NA	0.0032606	0.997315
UniRef50_F0R411: MiaB-like tRNA modifying enzyme|unclassified	0.636099	0.808785	1.00089	0.714657	NA	0.0032606	0.997315
UniRef50_R5KST6	0.41193	0.0865085	0.27793	0.344468	NA	0.00328579	0.997315
UniRef50_R5KST6|unclassified	0.41193	0.0865085	0.27793	0.344468	NA	0.00328579	0.997315
UniRef50_R7C8W7: Ribosomal RNA large subunit methyltransferase N|g__Coprococcus.s__Coprococcus_comes	0.848224	0.405929	0.298513	0.413605	NA	0.00328579	0.997315
UniRef50_C0BC13	1.85306	1.40553	1.09319	1.86241	NA	0.00328702	0.997315
UniRef50_R5MGF7: Hydrolyase tartrate beta subunit/fumarate domain protein Fe-S type	0.353559	0.509781	0.306931	0.18392	NA	0.00328702	0.997315
UniRef50_R5MGF7: Hydrolyase tartrate beta subunit/fumarate domain protein Fe-S type|unclassified	0.353559	0.509781	0.306931	0.18392	NA	0.00328702	0.997315
UniRef50_A0A023E4S4: Putative acriflavine resistance protein AcrB	0.0612248	0.232267	0.252303	0.0992205	NA	0.00329345	0.997315
UniRef50_A0A023E4S4: Putative acriflavine resistance protein AcrB|unclassified	0.0612248	0.232267	0.252303	0.0992205	NA	0.00329345	0.997315
UniRef50_S6CIW1|unclassified	0.203499	0.285563	0.233834	0.133416	NA	0.00329345	0.997315
UniRef50_UPI0001B4443E: naphthoate synthase	0.129872	0.234404	0.197258	0.144339	Inf	0.00329733	0.997315
UniRef50_UPI0001B4443E: naphthoate synthase|unclassified	0.129872	0.234404	0.197258	0.144339	Inf	0.00329733	0.997315
UniRef50_R6JAR7: Carbohydrate binding domain protein|unclassified	1.62928	2.08392	1.51115	1.49854	NA	0.00329743	0.997315
UniRef50_R5ES84: Phage/plasmid primase P4 family C-terminal domain|g__Lachnospiraceae_noname.s__Lachnospiraceae_bacterium_7_1_58FAA	7.02492	10.6506	9.53617	7.81629	NA	0.00330371	0.997315
UniRef50_F7L7G5	3.32714	4.86689	10.096	10.6078	NA	0.00330973	0.997315
UniRef50_R7KWN0: Glycoside transferase family 2	0.653706	1.00628	1.30918	0.776615	Inf	0.00333774	0.997315
UniRef50_R7KWN0: Glycoside transferase family 2|unclassified	0.653706	1.00628	1.30918	0.776615	Inf	0.00333774	0.997315
UniRef50_R7EKT5	0.229154	0.456965	0.887988	0.490263	-Inf	0.00333774	0.997315
UniRef50_R7EKT5|unclassified	0.229154	0.456965	0.887988	0.490263	-Inf	0.00333774	0.997315
UniRef50_G9YXR7	0.393294	0.678352	0.687912	0.707489	Inf	0.00333954	0.997315
UniRef50_R7HTX9: Crossover junction endodeoxyribonuclease RuvC	0.467899	0.704098	0.85181	0.683238	Inf	0.00333954	0.997315
UniRef50_R5UQM3	1.26203	0.839457	0.575051	1.3828	NA	0.00334094	0.997315
UniRef50_R5UQM3|unclassified	1.26203	0.839457	0.575051	1.3828	NA	0.00334094	0.997315
UniRef50_K1RC32: Phosphatidylserine/phosphatidylglycerophosphate/ cardiolipin synthase|g__Roseburia.s__Roseburia_inulinivorans	2.65714	2.59721	2.743	5.28717	-Inf	0.0033596	0.997315
UniRef50_A2BKX6: V-type ATP synthase alpha chain|unclassified	0.564283	0.623118	0.694056	0.499145	NA	0.00337313	0.997315
UniRef50_C5QT56: 50S ribosomal protein L20	1.2777	1.34898	1.38797	0.983132	NA	0.00337313	0.997315
UniRef50_C5QT56: 50S ribosomal protein L20|unclassified	1.2777	1.34898	1.38797	0.983132	NA	0.00337313	0.997315
UniRef50_D3ASB1	1.04464	0.980058	0.574321	0.846692	NA	0.00337313	0.997315
UniRef50_D4MUR6: Fe2+ transport system protein A|unclassified	0.908914	1.08673	1.07276	0.945502	NA	0.00337313	0.997315
UniRef50_E4Q0E8: Site-specific recombinase, phage integrase family	1.63485	1.09494	0.845164	1.21993	NA	0.00337313	0.997315
UniRef50_F0P9T0: Transcriptional regulator, putative	0.295906	0.187047	0.199746	0.264745	NA	0.00337313	0.997315
UniRef50_F0P9T0: Transcriptional regulator, putative|unclassified	0.295906	0.187047	0.199746	0.264745	NA	0.00337313	0.997315
UniRef50_K1T5S7: Aldehyde dehydrogenase ywdH (Fragment)	1.05026	1.53193	1.39401	1.0328	NA	0.00337313	0.997315
UniRef50_K1T5S7: Aldehyde dehydrogenase ywdH (Fragment)|unclassified	1.05026	1.53193	1.39401	1.0328	NA	0.00337313	0.997315
UniRef50_M1MHY5: ABC transporter related protein	0.546776	0.709713	0.655557	0.575017	NA	0.00337313	0.997315
UniRef50_M1MHY5: ABC transporter related protein|unclassified	0.546776	0.709713	0.655557	0.575017	NA	0.00337313	0.997315
UniRef50_X1QKC8: Marine sediment metagenome DNA, contig: S12H4_C02209 (Fragment)	0.801311	0.954743	0.95366	0.800579	NA	0.00337313	0.997315
UniRef50_X1QKC8: Marine sediment metagenome DNA, contig: S12H4_C02209 (Fragment)|unclassified	0.801311	0.954743	0.95366	0.800579	NA	0.00337313	0.997315
UniRef50_UPI0003639E0E: hypothetical protein, partial	0.0586992	0.14584	0.204967	0.156335	NA	0.00337475	0.997315
UniRef50_UPI0003639E0E: hypothetical protein, partial|unclassified	0.0586992	0.14584	0.204967	0.156335	NA	0.00337475	0.997315
UniRef50_R7PQ06	0.165128	0.129942	0.119602	0.272068	-Inf	0.00337475	0.997315
UniRef50_D6E0L5: Histidine kinase-, DNA gyrase B-, and HSP90-like ATPase|g__Eubacterium.s__Eubacterium_rectale	6.49614	5.32548	5.64707	7.36857	NA	0.00338547	0.997315
UniRef50_W8XXK5	0.196447	0.301932	0.225083	0.138289	NA	0.00338547	0.997315
UniRef50_W8XXK5|unclassified	0.196447	0.301932	0.225083	0.138289	NA	0.00338547	0.997315
UniRef50_R6XHB3: Excinuclease ABC subunit A|unclassified	0.86432	0.849555	0.61012	0.354522	NA	0.00338709	0.997315
UniRef50_R7JAF0: Alpha-1 2-mannosidase family protein	0.436898	0.708704	0.538351	0.267856	Inf	0.00339514	0.997315
UniRef50_R7JAF0: Alpha-1 2-mannosidase family protein|unclassified	0.436898	0.708704	0.538351	0.267856	Inf	0.00339514	0.997315
UniRef50_F5Z575: Methylglyoxal synthase	0.229171	0.404024	0.295396	0.277702	Inf	0.00339572	0.997315
UniRef50_F5Z575: Methylglyoxal synthase|unclassified	0.229171	0.404024	0.295396	0.277702	Inf	0.00339572	0.997315
UniRef50_R7KWN7: UPF0122 protein BN622_01802	0.40733	0.695275	0.900408	0.520388	NA	0.00339572	0.997315
UniRef50_R7KWN7: UPF0122 protein BN622_01802|unclassified	0.40733	0.695275	0.900408	0.520388	NA	0.00339572	0.997315
UniRef50_R5ZH56: tRNA-dihydrouridine synthase	0.201993	0.12723	0.102237	0.225055	-Inf	0.00339698	0.997315
UniRef50_R5ZH56: tRNA-dihydrouridine synthase|unclassified	0.201993	0.12723	0.102237	0.225055	-Inf	0.00339698	0.997315
UniRef50_V7I0G9: Transcriptional regulator	0.543223	0.433385	1.17479	1.63062	-Inf	0.00339698	0.997315
UniRef50_R6J0P5: Fe-S metabolism associated SufE|unclassified	0.134391	0.438932	0.52348	0.286543	NA	0.0033973	0.997315
UniRef50_A5KKZ1: Conserved domain protein	0.659491	0.404724	0.588913	0.931441	NA	0.00340667	0.997315
UniRef50_A5KKZ1: Conserved domain protein|unclassified	0.659491	0.404724	0.588913	0.931441	NA	0.00340667	0.997315
UniRef50_P76148	0.618575	1.59736	0.674933	0.412087	NA	0.00340667	0.997315
UniRef50_R5R2J7|unclassified	1.24751	1.15766	0.850253	1.23649	NA	0.00340667	0.997315
UniRef50_UPI00036F9849: nucleotidyltransferase	0.201677	0.273971	0.216584	0.148517	Inf	0.00342143	0.997315
UniRef50_UPI00036F9849: nucleotidyltransferase|unclassified	0.201677	0.273971	0.216584	0.148517	Inf	0.00342143	0.997315
UniRef50_A6LLN0: 30S ribosomal protein S5|g__Coprococcus.s__Coprococcus_comes	0.920751	0.494991	0.462705	0.68552	NA	0.00342143	0.997315
UniRef50_F0R8R4: Amino acid/peptide transporter|unclassified	0.639706	0.641997	0.717155	0.385272	-Inf	0.00342143	0.997315
UniRef50_G4A8E3: Mannonate dehydratase	0.172407	0.271802	0.401537	0.259234	Inf	0.00342489	0.997315
UniRef50_G4A8E3: Mannonate dehydratase|unclassified	0.172407	0.271802	0.401537	0.259234	Inf	0.00342489	0.997315
UniRef50_R6DT60: Shikimate kinase 2	0.20924	0.315472	0.278649	0.167904	NA	0.00344151	0.997315
UniRef50_R6DT60: Shikimate kinase 2|unclassified	0.20924	0.315472	0.278649	0.167904	NA	0.00344151	0.997315
UniRef50_R7DVU8|g__Akkermansia.s__Akkermansia_muciniphila	0.790859	3.1058	2.14795	1.42365	NA	0.00344151	0.997315
UniRef50_Q041L5: ABC-type cobalt transport system, permease component CbiQ related transporter	0.46366	0.212507	0.448895	0.81641	-Inf	0.00344228	0.997315
UniRef50_K1U8G1	0.721421	0.906079	0.681178	0.403657	Inf	0.00344815	0.997315
UniRef50_K1U8G1|unclassified	0.721421	0.906079	0.681178	0.403657	Inf	0.00344815	0.997315
UniRef50_R5W0M2	0.570091	1.04613	1.05792	0.92721	Inf	0.00344815	0.997315
UniRef50_R5W0M2|g__Alistipes.s__Alistipes_shahii	0.570091	1.04613	1.05792	0.92721	Inf	0.00344815	0.997315
UniRef50_O32721: Anti-sigma F factor|g__Roseburia.s__Roseburia_intestinalis	0.512944	0.19234	0.821257	1.03616	NA	0.00344815	0.997315
UniRef50_R6J492	0.641122	4.42774	3.02387	1.47297	NA	0.00344815	0.997315
UniRef50_S6CLC7|g__Adlercreutzia.s__Adlercreutzia_equolifaciens	0.158644	0.360913	0.314255	0.171113	NA	0.00347961	0.997315
UniRef50_F6A1B2: Phage major tail protein, phi13 family	1.3912	0.867105	0.814534	1.02803	NA	0.0034866	0.997315
UniRef50_R5DRI7|unclassified	0.522185	0.716593	0.749106	0.497982	Inf	0.00349123	0.997315
UniRef50_D4K9M9: CarD-like/TRCF domain	4.29284	4.35639	5.6537	6.7833	NA	0.00349816	0.997315
UniRef50_D4K9M9: CarD-like/TRCF domain|g__Faecalibacterium.s__Faecalibacterium_prausnitzii	4.1361	4.35639	5.59743	6.63402	NA	0.00349816	0.997315
UniRef50_R5R354	1.73948	0.996463	1.59479	2.09835	NA	0.00351041	0.997315
UniRef50_A5FN14: 50S ribosomal protein L17|unclassified	0.368591	0.466879	0.343048	0.21518	Inf	0.00354642	0.997315
UniRef50_R5Y9J9: Cation/multidrug efflux pump	0.715052	0.434766	0.351479	0.792418	NA	0.00354642	0.997315
UniRef50_R5Y9J9: Cation/multidrug efflux pump|unclassified	0.715052	0.434766	0.351479	0.792418	NA	0.00354642	0.997315
UniRef50_R5ZBB0	1.43081	0.918337	0.701628	1.67746	-Inf	0.00354642	0.997315
UniRef50_R5ZBB0|unclassified	1.43081	0.918337	0.701628	1.67746	-Inf	0.00354642	0.997315
UniRef50_G5M3U7: Fumarate hydratase class I, aerobic	0.285702	0.37407	0.309855	0.212827	Inf	0.00354715	0.997315
UniRef50_G5M3U7: Fumarate hydratase class I, aerobic|unclassified	0.285702	0.37407	0.309855	0.212827	Inf	0.00354715	0.997315
UniRef50_R5V8U7: Chaperone protein DnaK	0.218146	0.406544	0.266755	0.17789	Inf	0.00354715	0.997315
UniRef50_R5V8U7: Chaperone protein DnaK|unclassified	0.218146	0.406544	0.266755	0.17789	Inf	0.00354715	0.997315
UniRef50_A5ZVE2	0.479075	0.128799	0.338604	0.776499	NA	0.00354715	0.997315
UniRef50_A5ZVE2|g__Blautia.s__Ruminococcus_obeum	0.479075	0.128799	0.338604	0.776499	NA	0.00354715	0.997315
UniRef50_E4T3A4: Endonuclease MutS2	0.407783	0.392286	0.258216	0.187626	-Inf	0.00354715	0.997315
UniRef50_R5JPS2: C-terminal processing peptidase	0.355121	0.568849	0.624239	0.317696	-Inf	0.00354715	0.997315
UniRef50_R5JPS2: C-terminal processing peptidase|unclassified	0.355121	0.568849	0.624239	0.317696	-Inf	0.00354715	0.997315
UniRef50_R6P274: Cobalt ABC transporter ATP-binding protein	0.305667	0.519437	0.679178	0.236777	NA	0.00356466	0.997315
UniRef50_R6P274: Cobalt ABC transporter ATP-binding protein|unclassified	0.305667	0.519437	0.679178	0.236777	NA	0.00356466	0.997315
UniRef50_R6RJ77	1.43417	0.248261	0.7238	2.89036	NA	0.00356466	0.997315
UniRef50_R6NMS3: MATE efflux family protein	0.465107	0.570182	0.254009	0.647279	-Inf	0.00357547	0.997315
UniRef50_R6NMS3: MATE efflux family protein|unclassified	0.465107	0.570182	0.254009	0.647279	-Inf	0.00357547	0.997315
UniRef50_T2RE14: Delta-aminolevulinic acid dehydratase family protein	0.417744	0.346852	0.205843	0.420995	NA	0.00359047	0.997315
UniRef50_T2RE14: Delta-aminolevulinic acid dehydratase family protein|unclassified	0.417744	0.346852	0.205843	0.420995	NA	0.00359047	0.997315
UniRef50_A3DGS6: Glutamate racemase	0.618939	0.728842	0.850345	0.609891	NA	0.0035927	0.997315
UniRef50_A3DGS6: Glutamate racemase|unclassified	0.618939	0.728842	0.850345	0.609891	NA	0.0035927	0.997315
UniRef50_A9GRA4: 50S ribosomal protein L1|unclassified	0.923634	1.12975	1.00894	0.85317	NA	0.0035927	0.997315
UniRef50_B7GNH3: 30S ribosomal protein S15|unclassified	1.23921	1.38264	1.44339	1.12607	NA	0.0035927	0.997315
UniRef50_C8PSC8	2.14069	2.51338	2.68707	2.91604	NA	0.0035927	0.997315
UniRef50_C8PSC8|unclassified	2.14069	2.51338	2.68707	2.91604	NA	0.0035927	0.997315
UniRef50_K1U4D3: Ribosomal protein S13 (Fragment)	1.82352	2.22666	2.09893	1.60091	NA	0.0035927	0.997315
UniRef50_K1U4D3: Ribosomal protein S13 (Fragment)|unclassified	1.82352	2.22666	2.09893	1.60091	NA	0.0035927	0.997315
UniRef50_Q5F4W4: Putative membrane protein insertion efficiency factor	1.66296	2.41093	2.52982	1.57201	NA	0.0035927	0.997315
UniRef50_R6EMC3: Aldehyde dehydrogenase|unclassified	1.50109	2.09069	1.8952	1.42781	NA	0.0035927	0.997315
UniRef50_A0PZJ8: ABC transporter substrate-binding protein	0.229447	0.133018	0.115712	0.222498	NA	0.00360264	0.997315
UniRef50_A0PZJ8: ABC transporter substrate-binding protein|unclassified	0.229447	0.133018	0.115712	0.222498	NA	0.00360264	0.997315
UniRef50_P14407: Fumarate hydratase class I, anaerobic|unclassified	0.392303	0.480503	0.382601	0.309081	NA	0.00360839	0.997315
UniRef50_R7EZG6	0.623549	0.90788	0.73103	0.556373	NA	0.00361269	0.997315
UniRef50_R7EZG6|unclassified	0.623549	0.90788	0.73103	0.556373	NA	0.00361269	0.997315
UniRef50_N9XT05|g__Clostridium.s__Clostridium_hathewayi	0.0660273	0.0462336	0.0575827	0.115889	NA	0.003614	0.997315
UniRef50_V2YIA9	0.381176	0.203913	0.232027	0.61822	NA	0.003614	0.997315
UniRef50_R5DKJ4	4.51466	6.15441	6.0835	4.07742	NA	0.00361485	0.997315
UniRef50_P24138: Oligopeptide transport system permease protein OppB|g__Coprococcus.s__Coprococcus_comes	0.957144	0.688335	0.568684	1.14435	NA	0.00363362	0.997315
UniRef50_P97089: Electron transfer flavoprotein subunit beta|g__Coprococcus.s__Coprococcus_comes	0.810973	0.543786	0.523506	0.735041	NA	0.00363362	0.997315
UniRef50_R6F474: Transglycosylase	0.95563	0.983713	1.03307	0.524552	-Inf	0.00363362	0.997315
UniRef50_R6F474: Transglycosylase|unclassified	0.95563	0.983713	1.03307	0.524552	-Inf	0.00363362	0.997315
UniRef50_R7CK93	0.786127	0.31971	0.834159	1.223	NA	0.00363448	0.997315
UniRef50_B9KB48: Xanthine/uracil/vitamin C permease	0.371515	0.235376	0.147828	0.231956	NA	0.00365341	0.997315
UniRef50_UPI0004746BAC: 1-(5-phosphoribosyl)-5-[(5-phosphoribosylamino)methylideneamino] imidazole-4-carboxamide isomerase, partial	0.194636	0.255547	0.200149	0.113427	NA	0.00365341	0.997315
UniRef50_UPI0004746BAC: 1-(5-phosphoribosyl)-5-[(5-phosphoribosylamino)methylideneamino] imidazole-4-carboxamide isomerase, partial|unclassified	0.194636	0.255547	0.200149	0.113427	NA	0.00365341	0.997315
UniRef50_R5UKE7|g__Bacteroides.s__Bacteroides_caccae	1.12509	1.41758	1.12379	1.02973	Inf	0.00366026	0.997315
UniRef50_R5W311: Arginase/agmatinase/formimionoglutamate hydrolase arginase family|g__Alistipes.s__Alistipes_shahii	0.600233	0.9346	1.08701	0.839866	Inf	0.00366026	0.997315
UniRef50_R5W5Y0|g__Alistipes.s__Alistipes_shahii	0.738273	1.17341	1.63254	1.20148	Inf	0.00366026	0.997315
UniRef50_R7PAL8: Histidinol-phosphate aminotransferase|g__Bacteroides.s__Bacteroides_caccae	0.962348	1.33761	1.099	0.921619	Inf	0.00366026	0.997315
UniRef50_C0BA06	0.965254	0.493146	0.655493	0.78625	NA	0.00366026	0.997315
UniRef50_R7PDG4	0.549345	0.460603	0.372466	0.640801	-Inf	0.00366945	0.997315
UniRef50_R5RIR2: Biotin carboxyl carrier protein	0.633926	1.04995	1.00729	0.890367	NA	0.00369715	0.997315
UniRef50_R5RIR2: Biotin carboxyl carrier protein|unclassified	0.633926	1.04995	1.00729	0.890367	NA	0.00369715	0.997315
UniRef50_T0CVB6	0.843104	0.438797	0.542331	0.814149	NA	0.00369715	0.997315
UniRef50_T0CVB6|unclassified	0.843104	0.438797	0.542331	0.814149	NA	0.00369715	0.997315
UniRef50_UPI0003610B34: hypothetical protein, partial	0.646831	0.947764	2.11328	0.877152	NA	0.00369715	0.997315
UniRef50_UPI0003610B34: hypothetical protein, partial|unclassified	0.646831	0.947764	2.11328	0.877152	NA	0.00369715	0.997315
UniRef50_K1UTF1: DNA methylase (Fragment)	1.79727	1.44833	0.931064	0.166016	-Inf	0.00369827	0.997315
UniRef50_K1UTF1: DNA methylase (Fragment)|unclassified	1.79727	1.44833	0.931064	0.166016	-Inf	0.00369827	0.997315
UniRef50_R5UTU9: Carbohydrate binding domain protein	1.07536	0.710613	0.392308	1.03234	NA	0.00370829	0.997315
UniRef50_R5UTU9: Carbohydrate binding domain protein|unclassified	1.07536	0.710613	0.380416	1.03234	NA	0.00370829	0.997315
UniRef50_R6D030: Transcriptional regulator GntR family|g__Coprococcus.s__Coprococcus_comes	0.71916	0.37227	0.345093	0.52674	NA	0.00370829	0.997315
UniRef50_A8S9P7	5.67303	3.19139	4.38636	5.50625	-Inf	0.00370829	0.997315
UniRef50_F2NTW8: 30S ribosomal protein S5	0.211839	0.333324	0.307223	0.266584	NA	0.00370995	0.997315
UniRef50_F2NTW8: 30S ribosomal protein S5|unclassified	0.211839	0.333324	0.307223	0.266584	NA	0.00370995	0.997315
UniRef50_R5PU05	0.704479	0.786935	1.02538	0.519594	NA	0.00370995	0.997315
UniRef50_R5PU05|unclassified	0.704479	0.786935	1.02538	0.519594	NA	0.00370995	0.997315
UniRef50_W7AVF0: Alanyl-tRNA ligase	0.154842	0.178595	0.169765	0.223694	NA	0.00370995	0.997315
UniRef50_W7AVF0: Alanyl-tRNA ligase|unclassified	0.154842	0.178595	0.169765	0.223694	NA	0.00370995	0.997315
UniRef50_C1DUK1: Ornithine carbamoyltransferase, catabolic	0.463445	0.554598	0.690648	0.455866	NA	0.00371549	0.997315
UniRef50_C1DUK1: Ornithine carbamoyltransferase, catabolic|unclassified	0.463445	0.554598	0.690648	0.455866	NA	0.00371549	0.997315
UniRef50_R7HWV4	2.17687	1.75106	1.34099	2.03718	NA	0.00372211	0.997315
UniRef50_A6NPR2|g__Lachnospiraceae_noname.s__Lachnospiraceae_bacterium_7_1_58FAA	0.186225	0.230997	0.281691	0.266724	NA	0.00374328	0.997315
UniRef50_C4ZE66|g__Eubacterium.s__Eubacterium_rectale	0.76608	0.385805	1.65553	1.65854	NA	0.00374328	0.997315
UniRef50_C6Y403: N-acylglucosamine 2-epimerase	0.854706	2.64941	1.84356	0.881029	NA	0.00374328	0.997315
UniRef50_R5CWB5: DNA-binding helix-turn-helix protein|unclassified	1.02789	1.59332	1.63653	1.34162	NA	0.00374328	0.997315
UniRef50_R5KSD1|g__Dorea.s__Dorea_formicigenerans	3.53729	2.1381	2.88639	4.01953	NA	0.00374328	0.997315
UniRef50_K7SCU3	0.116076	0.672224	0.446347	0.743999	Inf	0.00376333	0.997315
UniRef50_K1UUB4: Amidophosphoribosyltransferase	0.858424	1.02439	0.689246	0.471218	Inf	0.00376464	0.997315
UniRef50_K1UUB4: Amidophosphoribosyltransferase|unclassified	0.858424	1.02439	0.689246	0.471218	Inf	0.00376464	0.997315
UniRef50_R6WR67	0.812025	0.260131	0.697384	1.16389	NA	0.00376845	0.997315
UniRef50_G2SYY9|g__Dorea.s__Dorea_formicigenerans	5.16265	3.54826	3.26357	4.34103	NA	0.00377006	0.997315
UniRef50_R5MF28: Capsular exopolysaccharide family	0.636365	0.762157	1.23354	0.798149	NA	0.00378105	0.997315
UniRef50_R5MF28: Capsular exopolysaccharide family|unclassified	0.636365	0.762157	1.23354	0.798149	NA	0.00378105	0.997315
UniRef50_K1SD90: ABC-type multidrug transport system, ATPase and permease component (Fragment)	0.50791	0.322975	0.521918	0.638067	NA	0.00379098	0.997315
UniRef50_K1SD90: ABC-type multidrug transport system, ATPase and permease component (Fragment)|unclassified	0.50791	0.322975	0.521918	0.638067	NA	0.00379098	0.997315
UniRef50_R5B2Q5	1.34106	1.52112	1.37564	1.09209	NA	0.00379098	0.997315
UniRef50_R5B2Q5|unclassified	1.34106	1.52112	1.37564	1.09209	NA	0.00379098	0.997315
UniRef50_R5KER8: DNA methylase family protein	0.337433	0.2751	0.161118	0.356824	NA	0.00381222	0.997315
UniRef50_R5KER8: DNA methylase family protein|unclassified	0.337433	0.2751	0.161118	0.356824	NA	0.00381222	0.997315
UniRef50_L6ZBJ6: Autoinducer 2 aldolase	0.223618	0.388352	0.463968	0.347666	NA	0.00381796	0.997315
UniRef50_L6ZBJ6: Autoinducer 2 aldolase|unclassified	0.223618	0.388352	0.463968	0.347666	NA	0.00381796	0.997315
UniRef50_D4ILK8: Electron transport complex subunit D|unclassified	0.331025	0.472216	0.258117	0.172392	Inf	0.00382136	0.997315
UniRef50_R6G7N0: Transcriptional regulator Rrf2 family|g__Dorea.s__Dorea_formicigenerans	0.275954	0.111249	0.23613	0.431703	-Inf	0.00382136	0.997315
UniRef50_R5Z4V3: DnaD and phage-associated domain	0.549609	0.435016	0.192748	0.560366	NA	0.00382356	0.997315
UniRef50_R5Z4V3: DnaD and phage-associated domain|unclassified	0.549609	0.435016	0.192748	0.560366	NA	0.00382356	0.997315
UniRef50_A7H8C5: 30S ribosomal protein S21|unclassified	0.621415	0.692705	0.768455	0.586763	NA	0.00382491	0.997315
UniRef50_A8MIX7: Glucosamine-6-phosphate deaminase|unclassified	0.580331	0.66615	0.716033	0.558199	NA	0.00382491	0.997315
UniRef50_B9E8E3: 3-hydroxyacyl-[acyl-carrier-protein] dehydratase FabZ|unclassified	0.399356	0.565649	0.757896	0.555313	NA	0.00382491	0.997315
UniRef50_C9D789: Iron hydrogenase alpha subunit (Fragment)	1.0433	1.03643	1.389	0.775198	NA	0.00382491	0.997315
UniRef50_C9D789: Iron hydrogenase alpha subunit (Fragment)|unclassified	1.0433	1.03643	1.389	0.775198	NA	0.00382491	0.997315
UniRef50_P38009: Bifunctional purine biosynthesis protein ADE17	0.709956	0.87415	0.802131	0.684303	NA	0.00382491	0.997315
UniRef50_P38009: Bifunctional purine biosynthesis protein ADE17|unclassified	0.709956	0.87415	0.802131	0.684303	NA	0.00382491	0.997315
UniRef50_T3LQZ0: Rnf-Nqr subunit, membrane family protein	0.888053	1.13407	1.18084	0.836231	NA	0.00382491	0.997315
UniRef50_T3LQZ0: Rnf-Nqr subunit, membrane family protein|unclassified	0.888053	1.13407	1.18084	0.836231	NA	0.00382491	0.997315
UniRef50_X0XD23: Marine sediment metagenome DNA, contig: S01H1_S28841 (Fragment)	0.464524	0.598411	0.710492	0.473476	NA	0.00382491	0.997315
UniRef50_X0XD23: Marine sediment metagenome DNA, contig: S01H1_S28841 (Fragment)|unclassified	0.464524	0.598411	0.710492	0.473476	NA	0.00382491	0.997315
UniRef50_R6RMB0: Haloacid dehalogenase superfamily subfamily IA variant 3 with third motif having DD or ED|unclassified	0.599093	0.831634	0.898962	0.508342	NA	0.00382548	0.997315
UniRef50_G2T0N9	2.37714	1.89532	1.09344	2.12297	NA	0.00382999	0.997315
UniRef50_R6Z784: Plasmid recombination enzyme	2.01042	3.15881	3.56758	3.74573	NA	0.00382999	0.997315
UniRef50_K1SWB7: Branched-chain-amino-acid transaminase (Fragment)	1.24624	1.3269	1.12096	0.925561	NA	0.00383225	0.997315
UniRef50_K1SWB7: Branched-chain-amino-acid transaminase (Fragment)|unclassified	1.24624	1.3269	1.12096	0.925561	NA	0.00383225	0.997315
UniRef50_R6UIA9: Queuine tRNA-ribosyltransferase	0.39912	0.282599	0.544325	0.873856	NA	0.00383773	0.997315
UniRef50_X1BGH5: Marine sediment metagenome DNA, contig: S01H4_C01576 (Fragment)	0.107617	0.154716	0.158401	0.114028	NA	0.00383773	0.997315
UniRef50_X1BGH5: Marine sediment metagenome DNA, contig: S01H4_C01576 (Fragment)|unclassified	0.107617	0.154716	0.158401	0.114028	NA	0.00383773	0.997315
UniRef50_H1CIF4: Cobalamin synthase	0.128783	0.307832	0.500462	0.45964	NA	0.00384032	0.997315
UniRef50_R5W8K9|g__Alistipes.s__Alistipes_putredinis	3.29403	3.45909	2.93552	2.48119	Inf	0.00385568	0.997315
UniRef50_R7JHB0|g__Alistipes.s__Alistipes_putredinis	2.6869	3.08369	2.69579	2.39267	Inf	0.00385568	0.997315
UniRef50_R5UJ48|g__Bacteroides.s__Bacteroides_vulgatus	3.10762	3.10258	1.42805	1.49039	NA	0.00385568	0.997315
UniRef50_R6P1I8	0.721594	0.336468	0.975125	0.513457	NA	0.00385568	0.997315
UniRef50_R6RNL6: DNA topology modulation protein|g__Faecalibacterium.s__Faecalibacterium_prausnitzii	1.47441	1.20796	1.18146	1.78234	NA	0.00385568	0.997315
UniRef50_W6AFB9: 50S ribosomal protein L11|unclassified	0.247877	0.37448	0.266989	0.166436	NA	0.00385568	0.997315
UniRef50_R5YW13: Ferrous iron transporter B|unclassified	0.454036	0.588944	0.399845	0.325215	Inf	0.0038577	0.997315
UniRef50_C8WKQ8: Two component transcriptional regulator, winged helix family|g__Lachnospiraceae_noname.s__Lachnospiraceae_bacterium_7_1_58FAA	0.0828164	0.252012	0.300109	0.197246	-Inf	0.00387625	0.997315
UniRef50_B2UNN7|g__Akkermansia.s__Akkermansia_muciniphila	0.924006	3.52137	2.34837	1.06488	Inf	0.00387832	0.997315
UniRef50_Q7UFS3: GMP synthase [glutamine-hydrolyzing]|g__Clostridium.s__Clostridium_leptum	0.418741	0.204283	0.587246	0.398993	NA	0.00388169	0.997315
UniRef50_A7V4I7	6.60277	7.91405	3.27602	1.84342	Inf	0.00389089	0.997315
UniRef50_J9G179: Alpha-L-arabinofuranosidase A (Fragment)	0.586286	1.05473	0.796702	0.559915	Inf	0.00389089	0.997315
UniRef50_J9G179: Alpha-L-arabinofuranosidase A (Fragment)|unclassified	0.586286	1.05473	0.796702	0.559915	Inf	0.00389089	0.997315
UniRef50_UPI000287F61C: hypothetical protein, partial	0.595337	0.4296	0.287873	0.700081	NA	0.00389089	0.997315
UniRef50_UPI000287F61C: hypothetical protein, partial|unclassified	0.595337	0.4296	0.287873	0.700081	NA	0.00389089	0.997315
UniRef50_R5EYD0	0.161619	0.292785	0.450364	0.131367	NA	0.00390695	0.997315
UniRef50_R6JN76: Site-specific recombinase phage integrase family|g__Bacteroides.s__Bacteroides_ovatus	1.58957	1.0258	0.985757	1.00941	NA	0.00390695	0.997315
UniRef50_R5B159: ATP-dependent DNA helicase RecG	0.585584	0.825642	0.583433	0.459206	NA	0.00393333	0.997315
UniRef50_R5B159: ATP-dependent DNA helicase RecG|unclassified	0.585584	0.825642	0.583433	0.459206	NA	0.00393333	0.997315
UniRef50_G4KP09|unclassified	0.783934	1.04429	0.987151	0.925514	NA	0.00394534	0.997315
UniRef50_R6GS31: Energy-coupling factor transporter ATP-binding protein EcfA	0.521462	0.662697	0.681379	0.631491	NA	0.00394534	0.997315
UniRef50_R6GS31: Energy-coupling factor transporter ATP-binding protein EcfA|unclassified	0.521462	0.662697	0.681379	0.631491	NA	0.00394534	0.997315
UniRef50_E6U3M6: Putative ribosome biogenesis GTPase RsgA	0.581479	0.846229	0.828229	0.565057	NA	0.00396825	0.997315
UniRef50_E6U3M6: Putative ribosome biogenesis GTPase RsgA|unclassified	0.581479	0.846229	0.828229	0.565057	NA	0.00396825	0.997315
UniRef50_D4K5A6: ATP synthase epsilon chain|unclassified	0.850175	0.646125	0.40396	0.796807	-Inf	0.00399224	0.997315
UniRef50_R7J684: Adenosylmethionine-8-amino-7-oxononanoate aminotransferase	0.118554	0.41413	0.395586	0.218094	Inf	0.00400222	0.997315
UniRef50_R7J684: Adenosylmethionine-8-amino-7-oxononanoate aminotransferase|unclassified	0.118554	0.41413	0.395586	0.218094	Inf	0.00400222	0.997315
UniRef50_D4KLU0	0.909572	0.557412	0.644916	1.04005	NA	0.00401823	0.997315
UniRef50_Q6A6R0: 30S ribosomal protein S4	0.882427	1.12247	1.00577	0.73378	NA	0.0040465	0.997315
UniRef50_Q6A6R0: 30S ribosomal protein S4|unclassified	0.882427	1.12247	1.00577	0.73378	NA	0.0040465	0.997315
UniRef50_R5I2A8	1.81336	1.29389	1.3026	2.2738	NA	0.0040465	0.997315
UniRef50_R6JBA3: Carboxynorspermidine decarboxylase	0.581721	2.54291	1.79912	0.649001	NA	0.00404954	0.997315
UniRef50_R7AGD7	0.475754	0.359412	0.296962	0.627058	NA	0.00404974	0.997315
UniRef50_Q891D3: Tyrosine--tRNA ligase|g__Flavonifractor.s__Flavonifractor_plautii	0.306988	0.260658	0.19164	0.462443	-Inf	0.00404974	0.997315
UniRef50_C8WJX2: Drug resistance transporter, EmrB/QacA subfamily|g__Adlercreutzia.s__Adlercreutzia_equolifaciens	0.14663	0.319716	0.242661	0.137529	Inf	0.00405694	0.997315
UniRef50_R9IGZ3	0.831874	0.659571	0.973196	0.431393	-Inf	0.00406146	0.997315
UniRef50_R9IGZ3|unclassified	0.831874	0.659571	0.973196	0.431393	-Inf	0.00406146	0.997315
UniRef50_F2JQH7: N-acetylglucosamine-6-phosphate deacetylase|g__Flavonifractor.s__Flavonifractor_plautii	0.195874	0.12534	0.086444	0.269722	NA	0.00407007	0.997315
UniRef50_J9D671	0.514713	0.654033	0.688722	0.383537	NA	0.00407007	0.997315
UniRef50_J9D671|unclassified	0.514713	0.654033	0.688722	0.383537	NA	0.00407007	0.997315
UniRef50_R5I237|unclassified	0.306552	0.321035	0.54624	0.288562	NA	0.00407007	0.997315
UniRef50_R7I1Q3: Putative transcription factor	0.301577	0.0600141	0.111918	0.194256	NA	0.00407007	0.997315
UniRef50_R7I1Q3: Putative transcription factor|unclassified	0.301577	0.0600141	0.111918	0.194256	NA	0.00407007	0.997315
UniRef50_A6LPD6: Methylglyoxal synthase	0.97455	1.29358	1.16277	1.03369	NA	0.0040704	0.997315
UniRef50_A6LPD6: Methylglyoxal synthase|unclassified	0.97455	1.29358	1.16277	1.03369	NA	0.0040704	0.997315
UniRef50_B0P8U1|unclassified	1.59562	1.61727	1.65586	1.25334	NA	0.0040704	0.997315
UniRef50_B9SSE8: Aspartyl-tRNA synthetase, putative	0.503545	0.641556	0.636749	0.525522	NA	0.0040704	0.997315
UniRef50_B9SSE8: Aspartyl-tRNA synthetase, putative|unclassified	0.503545	0.641556	0.636749	0.525522	NA	0.0040704	0.997315
UniRef50_R5F0T2: Uridylate kinase|unclassified	1.24817	1.53643	1.24076	1.15079	NA	0.0040704	0.997315
UniRef50_H1CL51	0.0797522	0.272279	0.524224	0.363598	Inf	0.00407814	0.997315
UniRef50_R6YPT7: ABC transporter substrate-binding protein family 3|g__Eubacterium.s__Eubacterium_ramulus	0.138634	0.344598	0.294191	0.0822715	Inf	0.00407814	0.997315
UniRef50_G9YX61: Efflux ABC transporter, permease protein|g__Flavonifractor.s__Flavonifractor_plautii	0.207661	0.134211	0.146052	0.333009	NA	0.00407814	0.997315
UniRef50_K2DMW0: Rod shape-determining protein MreB	0.116584	0.179585	0.197032	0.0578559	NA	0.00407814	0.997315
UniRef50_K2DMW0: Rod shape-determining protein MreB|unclassified	0.116584	0.179585	0.197032	0.0578559	NA	0.00407814	0.997315
UniRef50_R5UV04: Methyl-accepting chemotaxis sensory transducer	1.20902	0.79772	0.361857	1.4568	NA	0.00408553	0.997315
UniRef50_R5UV04: Methyl-accepting chemotaxis sensory transducer|unclassified	1.20902	0.79772	0.361857	1.4568	NA	0.00408553	0.997315
UniRef50_R5F4E6|g__Alistipes.s__Alistipes_putredinis	4.45521	4.62764	4.00418	3.52505	Inf	0.00408903	0.997315
UniRef50_F4XFX0	0.543689	0.250666	0.778759	1.28777	NA	0.00408903	0.997315
UniRef50_U8N2V2	0.35486	0.46867	0.343319	0.237529	NA	0.00408903	0.997315
UniRef50_U8N2V2|unclassified	0.35486	0.46867	0.343319	0.237529	NA	0.00408903	0.997315
UniRef50_R6UDE2: UDP-N-acetylmuramoyl-tripeptide--D-alanyl-D-alanine ligase	0.393008	0.22716	0.193306	0.288877	NA	0.00411137	0.997315
UniRef50_R6UDE2: UDP-N-acetylmuramoyl-tripeptide--D-alanyl-D-alanine ligase|unclassified	0.393008	0.22716	0.193306	0.288877	NA	0.00411137	0.997315
UniRef50_C4Z8M6: Capsular exopolysaccharide family|unclassified	0.808921	0.439372	0.344092	0.85872	-Inf	0.00411137	0.997315
UniRef50_R5ILR2|unclassified	0.0927106	0.366067	0.288066	0.212949	Inf	0.00412044	0.997315
UniRef50_R5KYH5: Putative DNA replication protein DnaC	0.431196	0.226383	0.270828	0.369212	NA	0.0041244	0.997315
UniRef50_R5Y0Q3: DNA-binding helix-turn-helix protein	0.499615	0.955388	0.649474	0.518975	NA	0.00415329	0.997315
UniRef50_R5Y0Q3: DNA-binding helix-turn-helix protein|unclassified	0.499615	0.955388	0.649474	0.518975	NA	0.00415329	0.997315
UniRef50_R6CLL9: Predicted RNA-binding protein homologous to eukaryotic snRNP	0.744212	1.08516	1.09512	0.851974	NA	0.00415329	0.997315
UniRef50_R6CLL9: Predicted RNA-binding protein homologous to eukaryotic snRNP|unclassified	0.744212	1.08516	1.09512	0.851974	NA	0.00415329	0.997315
UniRef50_Q46807: Carbamate kinase-like protein YqeA|g__Clostridium.s__Clostridium_hathewayi	0.167885	0.11142	0.102364	0.248248	NA	0.00415674	0.997315
UniRef50_R5QRZ5|unclassified	0.118126	0.452983	0.545765	0.154143	NA	0.00415674	0.997315
UniRef50_S2CZM8: LSU m3Psi1915 methyltransferase RlmH	0.304524	0.424644	0.378848	0.232176	NA	0.00415674	0.997315
UniRef50_S2CZM8: LSU m3Psi1915 methyltransferase RlmH|unclassified	0.304524	0.424644	0.378848	0.232176	NA	0.00415674	0.997315
UniRef50_D3IC38: SusC/RagA family TonB-linked outer membrane protein	2.81383	3.91175	4.63061	3.31153	NA	0.00417341	0.997315
UniRef50_B2UMK6	0.57992	2.7171	2.15563	0.861456	Inf	0.00417347	0.997315
UniRef50_N2BES2|g__Eubacterium.s__Eubacterium_rectale	4.8785	2.15188	4.42476	4.85482	NA	0.00417347	0.997315
UniRef50_D4K796	6.36048	6.27265	3.02911	12.2161	-Inf	0.00417347	0.997315
UniRef50_D4K796|g__Faecalibacterium.s__Faecalibacterium_prausnitzii	6.36048	6.27265	3.02911	12.2161	-Inf	0.00417347	0.997315
UniRef50_W7XVN4: Epidermin decarboxylase	0.221779	0.486109	0.402203	0.251624	Inf	0.00417483	0.997315
UniRef50_W7XVN4: Epidermin decarboxylase|unclassified	0.221779	0.486109	0.402203	0.251624	Inf	0.00417483	0.997315
UniRef50_Q813Z9: tRNA pseudouridine synthase A 2|unclassified	0.194044	0.100543	0.0717044	0.197583	NA	0.00417961	0.997315
UniRef50_I3U7B3: Branched chain amino acid ABC transporter ATPase	0.452552	0.589112	0.575033	0.437442	NA	0.00420544	0.997315
UniRef50_I3U7B3: Branched chain amino acid ABC transporter ATPase|unclassified	0.452552	0.589112	0.575033	0.437442	NA	0.00420544	0.997315
UniRef50_A8MGE4: Porphobilinogen deaminase|g__Lachnospiraceae_noname.s__Lachnospiraceae_bacterium_3_1_46FAA	0.162383	0.194823	0.167193	0.217543	NA	0.00421182	0.997315
UniRef50_R9H1W4	0.0512447	0.172083	0.120479	0.0296398	Inf	0.00423372	0.997315
UniRef50_R9H1W4|unclassified	0.0512447	0.172083	0.120479	0.0296398	Inf	0.00423372	0.997315
UniRef50_C4Z138: Indole-3-glycerol phosphate synthase|g__Roseburia.s__Roseburia_intestinalis	0.996902	0.360707	1.18293	1.46297	NA	0.00423372	0.997315
UniRef50_R5ML81	0.689508	1.43298	2.00656	0.77717	NA	0.00423483	0.997315
UniRef50_R5ML81|unclassified	0.689508	1.43298	2.00656	0.77717	NA	0.00423483	0.997315
UniRef50_C8VX22: Transcriptional regulator, ArsR family|unclassified	0.152598	0.062192	0.0780679	0.156624	NA	0.00423835	0.997315
UniRef50_E2ZIB7|g__Faecalibacterium.s__Faecalibacterium_prausnitzii	0.662489	0.6162	0.400026	0.547502	NA	0.00424908	0.997315
UniRef50_R6RX17	0.274208	0.217613	0.423435	0.679972	-Inf	0.00424908	0.997315
UniRef50_R6RX17|unclassified	0.274208	0.217613	0.423435	0.679972	-Inf	0.00424908	0.997315
UniRef50_K1T180	0.775016	0.380706	0.3418	0.758978	NA	0.00425001	0.997315
UniRef50_K1T180|unclassified	0.775016	0.380706	0.3418	0.758978	NA	0.00425001	0.997315
UniRef50_B1CAW7: Acyl-CoA thioester hydrolase, YbgC/YbaW family	0.284582	0.229893	0.194146	0.320123	-Inf	0.00425001	0.997315
UniRef50_B1CAW7: Acyl-CoA thioester hydrolase, YbgC/YbaW family|unclassified	0.284582	0.229893	0.194146	0.320123	-Inf	0.00425001	0.997315
UniRef50_C4Z8Q1: Glycosyltransferase Family 51 candidate bifunctional family GT51 b-glycosyltransferase/PBP transpeptidase (Candidate murein polymerase)|unclassified	0.96439	0.709842	0.561855	0.934986	NA	0.00425778	0.997315
UniRef50_K1RR68: Resolvase domain protein (Fragment)	0.309947	0.371362	0.508767	0.308283	NA	0.00427503	0.997315
UniRef50_K1RR68: Resolvase domain protein (Fragment)|unclassified	0.309947	0.371362	0.508767	0.308283	NA	0.00427503	0.997315
UniRef50_R6HHS4: Sugar (Glycoside-Pentoside-Hexuronide) transporter|g__Bacteroides.s__Bacteroides_vulgatus	5.22656	5.62626	2.61335	2.18946	NA	0.00429562	0.997315
UniRef50_R6K247	0.767136	0.558006	0.710112	0.954569	NA	0.00429562	0.997315
UniRef50_A0A015VMP1: Type I restriction modification DNA specificity domain protein	1.09353	0.798545	0.340999	0.505413	NA	0.00429827	0.997315
UniRef50_A0A015VMP1: Type I restriction modification DNA specificity domain protein|unclassified	1.09353	0.798545	0.340999	0.505413	NA	0.00429827	0.997315
UniRef50_R7EXU7: Ribosomal protein S12 methylthiotransferase RimO|unclassified	0.41673	0.464675	0.414211	0.29636	NA	0.00429827	0.997315
UniRef50_R7BM10: Oxidoreductase FAD-dependent	0.399293	0.621022	0.491902	0.403959	NA	0.00430057	0.997315
UniRef50_R7BM10: Oxidoreductase FAD-dependent|unclassified	0.399293	0.621022	0.491902	0.403959	NA	0.00430057	0.997315
UniRef50_E6SWH2|g__Bacteroides.s__Bacteroides_xylanisolvens	2.15807	1.41729	3.73824	5.12571	NA	0.00430563	0.997315
UniRef50_R5FRG3|g__Bacteroides.s__Bacteroides_xylanisolvens	2.93968	1.94577	1.5933	2.58411	NA	0.00430563	0.997315
UniRef50_E8R119: TatD-related deoxyribonuclease|g__Akkermansia.s__Akkermansia_muciniphila	0.669441	3.63717	2.43716	1.05074	-Inf	0.00430563	0.997315
UniRef50_R6EN42: Selenium-dependent molybdenum hydroxylase 1|g__Clostridium.s__Clostridium_hathewayi	0.0515789	0.0244781	0.0536403	0.110194	NA	0.00432719	0.997315
UniRef50_UPI0003B78B2D: hypothetical protein	0.115379	0.0954447	0.092078	0.144964	NA	0.00432719	0.997315
UniRef50_UPI0003B78B2D: hypothetical protein|unclassified	0.115379	0.0954447	0.092078	0.144964	NA	0.00432719	0.997315
UniRef50_A3CLN3: GTP-binding protein TypA/BipA, putative|unclassified	0.696408	0.744247	0.797935	0.639746	NA	0.00432981	0.997315
UniRef50_A5ZVC8: Aldehyde dehydrogenase (NAD) family protein|unclassified	1.5536	1.83951	1.88816	1.44499	NA	0.00432981	0.997315
UniRef50_E0S380: Transcriptional regulator MarR family|g__Blautia.s__Ruminococcus_torques	2.54904	3.54437	4.44974	3.13214	NA	0.00432981	0.997315
UniRef50_F3NYU8: Glutamate dehydrogenase	1.22615	1.51471	1.43315	1.2266	NA	0.00432981	0.997315
UniRef50_F3NYU8: Glutamate dehydrogenase|unclassified	1.22615	1.51471	1.43315	1.2266	NA	0.00432981	0.997315
UniRef50_F9MS64: TrpR family protein YerC/YecD-like protein	0.598652	0.903396	0.997486	0.869081	NA	0.00432981	0.997315
UniRef50_F9MS64: TrpR family protein YerC/YecD-like protein|unclassified	0.598652	0.903396	0.997486	0.869081	NA	0.00432981	0.997315
UniRef50_G0CSZ9: Aspartokinase	2.25307	1.19305	1.79043	2.70701	NA	0.00432981	0.997315
UniRef50_R5QYC8: Sporulation integral membrane protein YtvI	2.48979	1.84431	1.98547	2.586	NA	0.00432981	0.997315
UniRef50_R5R6J6: Lipoprotein|unclassified	1.10137	1.40127	1.27271	1.14868	NA	0.00432981	0.997315
UniRef50_R5YUN7: DNA translocase FtsK	1.4672	1.28442	1.15439	1.61562	NA	0.00432981	0.997315
UniRef50_S3YUB9	0.68322	0.880217	0.951198	0.772776	NA	0.00432981	0.997315
UniRef50_S3YUB9|unclassified	0.68322	0.880217	0.951198	0.772776	NA	0.00432981	0.997315
UniRef50_X1DVX7: Marine sediment metagenome DNA, contig: S01H4_S07641 (Fragment)	0.491105	0.686063	0.739243	0.585418	NA	0.00432981	0.997315
UniRef50_X1DVX7: Marine sediment metagenome DNA, contig: S01H4_S07641 (Fragment)|unclassified	0.491105	0.686063	0.739243	0.585418	NA	0.00432981	0.997315
UniRef50_I9UU07|g__Bacteroides.s__Bacteroides_xylanisolvens	1.16636	0.659574	0.487633	0.754507	NA	0.00433214	0.997315
UniRef50_R6T447: Major facilitator superfamily MFS_1|g__Bacteroides.s__Bacteroides_xylanisolvens	1.34348	0.843745	0.425401	0.780293	NA	0.00433214	0.997315
UniRef50_R7JIS4|g__Alistipes.s__Alistipes_putredinis	3.16081	3.81134	3.45102	3.30569	Inf	0.00433514	0.997315
UniRef50_R7PGT2	0.467804	0.306676	0.319044	0.493903	-Inf	0.00433514	0.997315
UniRef50_X1KIP0: Marine sediment metagenome DNA, contig: S06H3_C00815	0.216561	0.216389	0.377515	0.114628	-Inf	0.00433514	0.997315
UniRef50_X1KIP0: Marine sediment metagenome DNA, contig: S06H3_C00815|unclassified	0.216561	0.216389	0.377515	0.114628	-Inf	0.00433514	0.997315
UniRef50_J9FXH2: Protein containing Glycosyl hydrolase 92 domain protein (Fragment)	0.323128	0.588875	0.779196	0.545122	NA	0.00435887	0.997315
UniRef50_J9FXH2: Protein containing Glycosyl hydrolase 92 domain protein (Fragment)|unclassified	0.323128	0.588875	0.779196	0.545122	NA	0.00435887	0.997315
UniRef50_A6NT58|g__Lachnospiraceae_noname.s__Lachnospiraceae_bacterium_7_1_58FAA	0.183548	0.261239	0.343208	0.3021	Inf	0.00435936	0.997315
UniRef50_B2UNN7	0.924006	3.80243	2.50776	1.29011	Inf	0.00436493	0.997315
UniRef50_R5SMR9: Histidine kinase-DNA gyrase B-and HSP90-like ATPase./Histidine kinase./HAMP domain|g__Coprococcus.s__Coprococcus_comes	2.21427	1.15802	1.0067	1.22039	NA	0.00436493	0.997315
UniRef50_R6J492|g__Akkermansia.s__Akkermansia_muciniphila	0.641122	4.22917	2.85015	1.33311	NA	0.00436493	0.997315
UniRef50_A7VUP4: ATPase/histidine kinase/DNA gyrase B/HSP90 domain protein|g__Clostridium.s__Clostridium_leptum	0.301885	0.179668	0.26142	0.569491	-Inf	0.00436493	0.997315
UniRef50_K0DEK4	0.257195	0.388534	0.38374	0.159731	-Inf	0.00436493	0.997315
UniRef50_K0DEK4|unclassified	0.257195	0.388534	0.38374	0.159731	-Inf	0.00436493	0.997315
UniRef50_Q64R88: Beta-hexosaminidase	0.823339	1.20677	1.31244	1.16077	-Inf	0.00436493	0.997315
UniRef50_D4IM02: Thiol-disulfide isomerase and thioredoxins	0.692595	1.1065	1.27402	1.13797	Inf	0.0043697	0.997315
UniRef50_D4IM02: Thiol-disulfide isomerase and thioredoxins|g__Alistipes.s__Alistipes_shahii	0.692595	1.1065	1.27402	1.13797	Inf	0.0043697	0.997315
UniRef50_R5WVG2|g__Alistipes.s__Alistipes_shahii	0.740909	1.19826	1.44517	0.845684	Inf	0.0043697	0.997315
UniRef50_D9RZQ4: Transposase IS3/IS911 family protein	0.543058	0.422742	0.390851	0.592265	NA	0.0043697	0.997315
UniRef50_D9RZQ4: Transposase IS3/IS911 family protein|unclassified	0.543058	0.422742	0.390851	0.592265	NA	0.0043697	0.997315
UniRef50_C4ZAL6|g__Eubacterium.s__Eubacterium_rectale	0.739406	0.575794	0.500794	1.06445	-Inf	0.0043697	0.997315
UniRef50_R6QJK4: Peptidase S8 and S53 subtilisin kexin sedolisin|unclassified	0.230273	0.190026	0.111851	0.276564	-Inf	0.0043697	0.997315
UniRef50_R7GKA2|unclassified	0.34094	0.358589	0.118264	0.37457	-Inf	0.0043697	0.997315
UniRef50_D4IMU0	1.0544	2.08216	2.0919	2.09683	NA	0.0044	0.997315
UniRef50_I9Q391	2.68181	3.24504	2.72432	2.48097	NA	0.0044	0.997315
UniRef50_K1TB03	4.54037	6.73366	5.46822	3.31736	NA	0.0044	0.997315
UniRef50_K1TB03|unclassified	4.54037	6.73366	5.46822	3.31736	NA	0.0044	0.997315
UniRef50_R6W530: Putative nucleic-acid-binding protein implicated in transcription termination	0.143263	0.289218	0.289346	0.242976	NA	0.00441711	0.997315
UniRef50_R6W530: Putative nucleic-acid-binding protein implicated in transcription termination|unclassified	0.143263	0.289218	0.289346	0.242976	NA	0.00441711	0.997315
UniRef50_K1UE43: Amino acid carrier protein (Fragment)	0.612002	1.19435	1.18604	0.466111	NA	0.00442501	0.997315
UniRef50_K1UE43: Amino acid carrier protein (Fragment)|unclassified	0.612002	1.19435	1.18604	0.466111	NA	0.00442501	0.997315
UniRef50_R5BR90: Protein MraZ	0.115598	0.150661	0.274223	0.190869	NA	0.00442501	0.997315
UniRef50_R5BR90: Protein MraZ|unclassified	0.108166	0.150661	0.274223	0.190869	NA	0.00442501	0.997315
UniRef50_K1TRR9: ABC transporter, ATP-binding protein (Fragment)	1.50992	2.48702	1.74502	1.87902	NA	0.00442867	0.997315
UniRef50_K1TRR9: ABC transporter, ATP-binding protein (Fragment)|unclassified	1.50992	2.48702	1.74502	1.87902	NA	0.00442867	0.997315
UniRef50_R5ZJR8: Transcriptional regulator AraC family	5.36694	3.54113	2.85681	4.03112	NA	0.00442867	0.997315
UniRef50_E3GKI6|g__Bacteroides.s__Bacteroides_dorei	0.61956	0.300912	0.374866	0.499736	NA	0.00443127	0.997315
UniRef50_B4UDE8: Cell division ATP-binding protein FtsE	0.109006	0.080154	0.0546619	0.104955	-Inf	0.00443127	0.997315
UniRef50_B4UDE8: Cell division ATP-binding protein FtsE|unclassified	0.109006	0.080154	0.0546619	0.104955	-Inf	0.00443127	0.997315
UniRef50_Q1D759: 50S ribosomal protein L18|unclassified	0.265413	0.330873	0.327974	0.203488	NA	0.00443509	0.997315
UniRef50_A5D3W4: Cytidine deaminase	0.597858	0.827957	1.16036	0.792724	NA	0.00445541	0.997315
UniRef50_R6EDS8	1.18234	2.39987	1.81457	1.05593	NA	0.00445541	0.997315
UniRef50_R6EDS8|unclassified	1.18234	2.39987	1.81457	1.05593	NA	0.00445541	0.997315
UniRef50_R7PDG4|unclassified	0.304875	0.170164	0.218185	0.450527	-Inf	0.00447508	0.997315
UniRef50_Q8A4L6|g__Bacteroides.s__Bacteroides_stercoris	1.02099	1.40894	0.937669	0.902601	NA	0.00448619	0.997315
UniRef50_R7ELL9|g__Bacteroides.s__Bacteroides_uniformis	2.10367	2.26303	4.81841	6.96751	-Inf	0.00449494	0.997315
UniRef50_A6LLN0: 30S ribosomal protein S5	1.04697	0.572843	0.510937	0.755703	NA	0.00450375	0.997315
UniRef50_F2NVJ7: S-adenosylmethionine:tRNA ribosyltransferase-isomerase	0.148181	0.286975	0.272126	0.200354	NA	0.00450968	0.997315
UniRef50_F2NVJ7: S-adenosylmethionine:tRNA ribosyltransferase-isomerase|unclassified	0.148181	0.286975	0.272126	0.200354	NA	0.00450968	0.997315
UniRef50_G1WSQ9|g__Dorea.s__Dorea_formicigenerans	0.138908	0.0538264	0.147721	0.208367	NA	0.00450968	0.997315
UniRef50_G4KX35: UPF0272 protein OBV_12520	0.134456	0.257398	0.229738	0.182636	NA	0.00450968	0.997315
UniRef50_G4KX35: UPF0272 protein OBV_12520|unclassified	0.134456	0.257398	0.229738	0.182636	NA	0.00450968	0.997315
UniRef50_V9GDA9: Alpha-galactosidase	0.410988	0.199876	0.22999	0.388222	NA	0.00450968	0.997315
UniRef50_V9GDA9: Alpha-galactosidase|unclassified	0.410988	0.199876	0.22999	0.388222	NA	0.00450968	0.997315
UniRef50_R6G9Q8: Bacterial group 2 Ig-like protein|g__Eubacterium.s__Eubacterium_hallii	0.296274	0.641039	0.694989	0.730673	NA	0.00451021	0.997315
UniRef50_S7HTZ3	0.406457	0.166028	0.327456	0.339066	4.44369	0.00452827	0.997315
UniRef50_S7HTZ3|unclassified	0.406457	0.166028	0.327456	0.339066	4.44369	0.00452827	0.997315
UniRef50_U2QH51: S1 RNA binding domain protein|unclassified	0.711552	0.955747	0.950678	0.744219	NA	0.00452827	0.997315
UniRef50_A6BHJ7	1.92379	1.31698	2.2226	2.25376	NA	0.00454119	0.997315
UniRef50_B4BS51: Transcriptional regulator involved in nitrogen regulation, NifR3/Smm1 family	0.44455	0.630565	0.547578	0.3417	NA	0.00454119	0.997315
UniRef50_B4BS51: Transcriptional regulator involved in nitrogen regulation, NifR3/Smm1 family|unclassified	0.44455	0.630565	0.547578	0.3417	NA	0.00454119	0.997315
UniRef50_X1SN38: Marine sediment metagenome DNA, contig: S12H4_L07521 (Fragment)	0.373807	0.519145	0.541581	0.359687	NA	0.00454119	0.997315
UniRef50_X1SN38: Marine sediment metagenome DNA, contig: S12H4_L07521 (Fragment)|unclassified	0.373807	0.519145	0.541581	0.359687	NA	0.00454119	0.997315
UniRef50_A5Z4Z1: Conserved domain protein|g__Blautia.s__Ruminococcus_obeum	4.57171	6.83858	10.7207	3.8698	NA	0.00454982	0.997315
UniRef50_R5D617	1.57199	1.26064	0.934481	1.6328	NA	0.00455501	0.997315
UniRef50_R5KDB1: Glutamate synthase small chain|unclassified	0.623777	0.797376	1.27975	0.742565	Inf	0.00455513	0.997315
UniRef50_R6N0M2|g__Clostridium.s__Clostridium_leptum	0.439891	0.287945	0.486177	0.40172	-Inf	0.00455513	0.997315
UniRef50_R5GCN9: Penicillin-binding protein 1A|unclassified	0.669874	0.766181	0.484506	0.325151	Inf	0.0045655	0.997315
UniRef50_R5F590	0.75426	0.731551	1.02894	0.357117	-Inf	0.0045655	0.997315
UniRef50_R6CJB7: Ferrous iron transport protein B|unclassified	0.345209	0.481749	0.387962	0.351822	Inf	0.00457187	0.997315
UniRef50_E0RXT9|g__Eubacterium.s__Eubacterium_rectale	2.02058	1.69369	0.608081	1.2049	NA	0.00457187	0.997315
UniRef50_W4UQL7: Monofunctional biosynthetic peptidoglycan transglycosylase	0.889166	1.01128	1.01644	0.666978	Inf	0.0045946	0.997315
UniRef50_W4UQL7: Monofunctional biosynthetic peptidoglycan transglycosylase|unclassified	0.889166	1.01128	1.01644	0.666978	Inf	0.0045946	0.997315
UniRef50_C0FSF4: Plasmid recombination enzyme|g__Roseburia.s__Roseburia_inulinivorans	0.590735	0.26472	0.512451	1.72012	-Inf	0.0045946	0.997315
UniRef50_R6XVF4	0.570808	0.678908	0.827777	1.45951	NA	0.00459895	0.997315
UniRef50_A7VFU7	0.664408	0.893049	0.842098	0.719371	NA	0.0046038	0.997315
UniRef50_A7VFU7|unclassified	0.664408	0.893049	0.842098	0.719371	NA	0.0046038	0.997315
UniRef50_D5EXW7: Xanthine phosphoribosyltransferase	0.708067	0.769975	0.769087	0.686003	NA	0.0046038	0.997315
UniRef50_D5EXW7: Xanthine phosphoribosyltransferase|unclassified	0.708067	0.769975	0.769087	0.686003	NA	0.0046038	0.997315
UniRef50_J9LQR0	0.730686	0.829185	0.879382	0.747589	NA	0.0046038	0.997315
UniRef50_J9LQR0|unclassified	0.730686	0.829185	0.879382	0.747589	NA	0.0046038	0.997315
UniRef50_K1T9N6|unclassified	6.44092	6.90874	7.97246	7.06042	NA	0.0046038	0.997315
UniRef50_R7JRJ0: Malate dehydrogenase (Oxaloacetate-decarboxylating)|unclassified	0.493912	0.766166	0.532307	0.504614	NA	0.0046038	0.997315
UniRef50_W4VM21: Inosine-5'-monophosphate dehydrogenase	1.03277	1.32935	1.30359	1.06273	NA	0.0046038	0.997315
UniRef50_W4VM21: Inosine-5'-monophosphate dehydrogenase|unclassified	1.03277	1.32935	1.30359	1.06273	NA	0.0046038	0.997315
UniRef50_W6AMV3	1.05385	1.32072	1.16484	1.10905	NA	0.0046038	0.997315
UniRef50_W6AMV3|unclassified	1.05385	1.32072	1.16484	1.10905	NA	0.0046038	0.997315
UniRef50_X4WFY8	0.535389	0.64283	0.617341	0.500681	NA	0.0046038	0.997315
UniRef50_X4WFY8|unclassified	0.535389	0.64283	0.617341	0.500681	NA	0.0046038	0.997315
UniRef50_R7HTX9: Crossover junction endodeoxyribonuclease RuvC|unclassified	0.467899	0.704098	0.592083	0.533024	Inf	0.00460732	0.997315
UniRef50_C0B824|g__Coprococcus.s__Coprococcus_comes	1.14728	0.617859	0.545603	0.643572	NA	0.00460732	0.997315
UniRef50_A9KTE0: 33 kDa chaperonin|g__Coprococcus.s__Coprococcus_comes	0.701013	0.342174	0.579128	0.714739	NA	0.00462843	0.997315
UniRef50_C0Q953: Selenide, water dikinase	1.70891	0.626857	0.73093	1.66229	NA	0.00462996	0.997315
UniRef50_D6E047: Predicted transcriptional regulators|g__Dorea.s__Dorea_formicigenerans	5.48327	3.15524	4.40412	7.16052	NA	0.00462996	0.997315
UniRef50_R6BMW8: Membrane protein OxaA|unclassified	0.565806	0.875278	0.713961	0.522015	NA	0.00462996	0.997315
UniRef50_R5HNY6|unclassified	1.16316	1.02579	0.582878	1.36788	-Inf	0.00462996	0.997315
UniRef50_R6SXR0: Acetyl-CoA hydrolase/transferase|g__Alistipes.s__Alistipes_shahii	0.782446	1.06508	1.05301	0.858115	Inf	0.00463254	0.997315
UniRef50_I1W9V5	1.46213	1.97746	1.7561	2.29057	NA	0.00463254	0.997315
UniRef50_F9ELT6	0.14643	0.190409	0.274412	0.0479624	-Inf	0.00463254	0.997315
UniRef50_F9ELT6|unclassified	0.14643	0.190409	0.274412	0.0479624	-Inf	0.00463254	0.997315
UniRef50_B8CZZ8: Aconitate hydratase|g__Lachnospiraceae_noname.s__Lachnospiraceae_bacterium_7_1_58FAA	0.167431	0.252435	0.28255	0.218481	NA	0.00465992	0.997315
UniRef50_R9LN62	0.206825	0.310547	0.317356	0.177856	NA	0.00467869	0.997315
UniRef50_R9LN62|unclassified	0.206825	0.310547	0.317356	0.177856	NA	0.00467869	0.997315
UniRef50_F3KBG1: 50S ribosomal protein L3	0.650411	0.807012	0.839566	0.593261	-Inf	0.00467869	0.997315
UniRef50_F3KBG1: 50S ribosomal protein L3|unclassified	0.650411	0.807012	0.839566	0.593261	-Inf	0.00467869	0.997315
UniRef50_L6Q626: Oxaloacetate decarboxylase	0.219039	0.278811	0.413202	0.199081	-Inf	0.00467869	0.997315
UniRef50_L6Q626: Oxaloacetate decarboxylase|unclassified	0.219039	0.278811	0.413202	0.199081	-Inf	0.00467869	0.997315
UniRef50_R6FX79: Beta-galactosidase (Lactase)	0.238119	0.353877	0.312572	0.205465	NA	0.00468197	0.997315
UniRef50_R6FX79: Beta-galactosidase (Lactase)|unclassified	0.238119	0.353877	0.312572	0.205465	NA	0.00468197	0.997315
UniRef50_R6Y793: D-alanyl-D-alanine carboxypeptidase	0.440215	0.621596	0.707003	0.532001	NA	0.00468197	0.997315
UniRef50_R6Y793: D-alanyl-D-alanine carboxypeptidase|unclassified	0.440215	0.621596	0.707003	0.532001	NA	0.00468197	0.997315
UniRef50_W0IX70: Transporter	0.524368	2.6194	1.46446	0.676162	NA	0.0046887	0.997315
UniRef50_D9R764: Glycoside hydrolase family 2 sugar binding protein|g__Clostridium.s__Clostridium_hathewayi	0.0907332	0.0383435	0.057181	0.112638	NA	0.00470026	0.997315
UniRef50_X5JX34: Aspartate 1-decarboxylase	0.056969	0.038992	0.0156647	0.0839662	-Inf	0.00470465	0.997315
UniRef50_X5JX34: Aspartate 1-decarboxylase|unclassified	0.056969	0.038992	0.0156647	0.0839662	-Inf	0.00470465	0.997315
UniRef50_R5KJF2: Basic membrane protein	0.333003	0.210659	0.305112	0.493736	NA	0.00475098	0.997315
UniRef50_R5KJF2: Basic membrane protein|unclassified	0.333003	0.210659	0.305112	0.493736	NA	0.00475098	0.997315
UniRef50_R6NNL6: AraC-type DNA-binding domain-containing protein transcriptional regulator|unclassified	0.21732	0.125786	0.0729535	0.2493	NA	0.00475317	0.997315
UniRef50_X1R9V2: Marine sediment metagenome DNA, contig: S12H4_L07242 (Fragment)	0.0663565	0.192863	0.168926	0.041862	NA	0.00475317	0.997315
UniRef50_X1R9V2: Marine sediment metagenome DNA, contig: S12H4_L07242 (Fragment)|unclassified	0.0663565	0.192863	0.168926	0.041862	NA	0.00475317	0.997315
UniRef50_E6SQK9: HAD-superfamily hydrolase, subfamily IA, variant 3|g__Bacteroides.s__Bacteroides_caccae	1.04527	1.64163	1.05726	0.95498	Inf	0.00476551	0.997315
UniRef50_R6W7A5: Putative glycosyl transferase	1.35121	1.62571	1.6684	0.920375	Inf	0.00477113	0.997315
UniRef50_R6W7A5: Putative glycosyl transferase|unclassified	1.35121	1.62571	1.6684	0.920375	Inf	0.00477113	0.997315
UniRef50_R6VDG4	1.49115	0.628027	0.729656	0.983254	NA	0.00481758	0.997315
UniRef50_C6LED4: Potassium transporter peripheral membrane component|unclassified	0.561119	0.740608	0.738171	0.661056	5.24916	0.004823	0.997315
UniRef50_F7MN46	0.501029	0.696615	0.743535	0.604845	NA	0.004823	0.997315
UniRef50_F7MN46|unclassified	0.501029	0.696615	0.743535	0.604845	NA	0.004823	0.997315
UniRef50_G1WVK8	0.686059	0.49594	0.830975	1.03343	NA	0.004823	0.997315
UniRef50_R6ZZ54: Methionyl-tRNA formyltransferase	0.71132	0.958951	0.965885	0.74535	NA	0.004823	0.997315
UniRef50_R6ZZ54: Methionyl-tRNA formyltransferase|unclassified	0.71132	0.957051	0.965885	0.74535	NA	0.004823	0.997315
UniRef50_R7DFU3	0.877565	1.38306	1.3681	1.24316	NA	0.004823	0.997315
UniRef50_Q64WG8: tRNA-specific 2-thiouridylase MnmA 2|unclassified	0.72907	1.0041	1.00356	0.675516	NA	0.00484243	0.997315
UniRef50_D4K8K2: Site-specific recombinases, DNA invertase Pin homologs|g__Eubacterium.s__Eubacterium_rectale	1.45044	1.28894	0.781422	2.25896	-Inf	0.00484243	0.997315
UniRef50_R5UIY5	2.03236	1.11693	0.974119	2.09448	NA	0.00484492	0.997315
UniRef50_R5UIY5|unclassified	2.03236	1.11693	0.974119	2.09448	NA	0.00484492	0.997315
UniRef50_R5UNJ0: Protein kinase domain	1.54155	1.03665	0.435391	1.58539	NA	0.00484509	0.997315
UniRef50_R5UNJ0: Protein kinase domain|unclassified	1.54155	1.03665	0.435391	1.58539	NA	0.00484509	0.997315
UniRef50_B5YDT2: D-tyrosyl-tRNA(Tyr) deacylase|g__Alistipes.s__Alistipes_putredinis	3.25512	3.70054	2.99717	2.52978	Inf	0.00486804	0.997315
UniRef50_R5UFB8: Methionine synthase|g__Alistipes.s__Alistipes_putredinis	2.83018	3.24763	2.6026	2.29165	Inf	0.00486804	0.997315
UniRef50_C8WHN7: Guanylate kinase	0.240608	0.333654	0.171123	0.664888	-Inf	0.00486804	0.997315
UniRef50_J9GNV1: Transglycosylase	0.478817	0.651202	0.41798	0.331579	Inf	0.00488509	0.997315
UniRef50_J9GNV1: Transglycosylase|unclassified	0.478817	0.651202	0.41798	0.331579	Inf	0.00488509	0.997315
UniRef50_D3AMV2	0.259157	0.551371	0.559702	0.214936	-Inf	0.00488509	0.997315
UniRef50_E3GN14	0.267658	0.261671	0.146763	0.401738	-Inf	0.00488509	0.997315
UniRef50_E3GN14|unclassified	0.267658	0.261671	0.146763	0.396654	-Inf	0.00488509	0.997315
UniRef50_UPI000363A0C3: hypothetical protein|unclassified	0.151038	0.207654	0.290076	0.138671	NA	0.00488608	0.997315
UniRef50_C3ESA2: Transposase, IS605 OrfB	0.226766	0.373064	0.325173	0.236276	NA	0.00488862	0.997315
UniRef50_C3ESA2: Transposase, IS605 OrfB|unclassified	0.226766	0.373064	0.325173	0.236276	NA	0.00488862	0.997315
UniRef50_R5FBI0	5.49813	9.20837	6.12751	6.75809	2.32241	0.00489307	0.997315
UniRef50_A0DCE1: Chromosome undetermined scaffold_45, whole genome shotgun sequence	0.731917	0.861086	0.775325	0.638645	NA	0.00489307	0.997315
UniRef50_A0DCE1: Chromosome undetermined scaffold_45, whole genome shotgun sequence|unclassified	0.731917	0.861086	0.775325	0.638645	NA	0.00489307	0.997315
UniRef50_B2UP31: DNA-3-methyladenine glycosylase I	1.53904	3.63901	3.47117	2.53836	NA	0.00489307	0.997315
UniRef50_C0B815: UDP-glucose 4-epimerase family protein|unclassified	2.70769	3.88705	3.70189	3.06246	NA	0.00489307	0.997315
UniRef50_C0C0J8	0.841872	1.33677	1.23324	1.03585	NA	0.00489307	0.997315
UniRef50_C0C0J8|unclassified	0.841872	1.33677	1.23324	1.03585	NA	0.00489307	0.997315
UniRef50_K1TWI9: Polynucleotide phosphorylase/polyadenylase (Fragment)	3.35418	3.93438	3.98431	3.07394	NA	0.00489307	0.997315
UniRef50_K1TWI9: Polynucleotide phosphorylase/polyadenylase (Fragment)|unclassified	3.35418	3.93438	3.98431	3.07394	NA	0.00489307	0.997315
UniRef50_P37745: dTDP-4-dehydrorhamnose 3,5-epimerase	13.5928	15.0494	15.1501	12.9494	NA	0.00489307	0.997315
UniRef50_R5Y470: N5-carboxyaminoimidazole ribonucleotide mutase	0.513267	0.780731	1.02149	0.690945	NA	0.00489307	0.997315
UniRef50_R5Y470: N5-carboxyaminoimidazole ribonucleotide mutase|unclassified	0.513267	0.780731	1.02149	0.690945	NA	0.00489307	0.997315
UniRef50_UPI0004720260: hypothetical protein, partial	0.694526	0.840142	0.955665	0.665432	NA	0.00489307	0.997315
UniRef50_UPI0004720260: hypothetical protein, partial|unclassified	0.694526	0.840142	0.955665	0.665432	NA	0.00489307	0.997315
UniRef50_X3YWW7: GMP synthase	0.481185	0.4831	0.45125	0.370452	NA	0.00489307	0.997315
UniRef50_X3YWW7: GMP synthase|unclassified	0.481185	0.4831	0.45125	0.370452	NA	0.00489307	0.997315
UniRef50_D0FXA0: Ornithine cyclodeaminase|unclassified	1.07726	0.644182	0.600388	0.962128	NA	0.00490323	0.997315
UniRef50_G2T5C5|g__Roseburia.s__Roseburia_hominis	0.917237	0.796008	0.834291	1.28518	NA	0.00490323	0.997315
UniRef50_T4H9L2	0.425375	0.477192	0.803087	0.527196	-Inf	0.00490323	0.997315
UniRef50_T4H9L2|unclassified	0.425375	0.477192	0.803087	0.527196	-Inf	0.00490323	0.997315
UniRef50_A6LHA9: Acetate kinase|g__Alistipes.s__Alistipes_shahii	0.697329	1.05033	0.96243	0.833641	Inf	0.00490961	0.997315
UniRef50_UPI0003B7890C: hypothetical protein	0.271264	0.418925	0.265378	0.165507	Inf	0.00490961	0.997315
UniRef50_UPI0003B7890C: hypothetical protein|unclassified	0.271264	0.418925	0.265378	0.165507	Inf	0.00490961	0.997315
UniRef50_K9VEP1: NAD(P)-dependent nickel-iron dehydrogenase flavin-containing subunit	0.429385	0.491768	0.567417	0.375709	NA	0.00493366	0.997315
UniRef50_K9VEP1: NAD(P)-dependent nickel-iron dehydrogenase flavin-containing subunit|unclassified	0.429385	0.491768	0.567417	0.375709	NA	0.00493366	0.997315
UniRef50_R6X2N4	3.3561	3.20478	4.60965	3.36191	NA	0.00493366	0.997315
UniRef50_A6LRH4: Binding-protein-dependent transport systems inner membrane component	0.521956	0.147785	0.256025	0.535648	NA	0.00495422	0.997315
UniRef50_C7G9V4: Penicillin-binding protein, transpeptidase domain protein|unclassified	0.540524	0.524586	0.355149	0.764022	-Inf	0.00495422	0.997315
UniRef50_R5RWX3: Sigma-70 region 4 subfamily	0.807667	1.36586	1.15037	0.763302	NA	0.00495673	0.997315
UniRef50_R5RWX3: Sigma-70 region 4 subfamily|unclassified	0.807667	1.36586	1.15037	0.763302	NA	0.00495673	0.997315
UniRef50_R6GED2: TfoX N-terminal domain protein|unclassified	0.894981	0.612571	0.56906	0.882663	NA	0.00495673	0.997315
UniRef50_X1BQN0: Marine sediment metagenome DNA, contig: S01H4_S14047	0.280611	0.339815	0.361678	0.277394	NA	0.00496505	0.997315
UniRef50_X1BQN0: Marine sediment metagenome DNA, contig: S01H4_S14047|unclassified	0.280611	0.339815	0.361678	0.277394	NA	0.00496505	0.997315
UniRef50_R9I1L5	0.960508	1.48679	3.09565	2.73053	Inf	0.00496654	0.997315
UniRef50_R5NUY9: Elongation factor Ts	1.00449	1.06125	1.05899	0.872152	NA	0.00496654	0.997315
UniRef50_D5EV74|unclassified	0.803191	1.27723	0.88328	0.528475	NA	0.00498307	0.997315
UniRef50_R5EUD5|g__Alistipes.s__Alistipes_shahii	1.17823	1.59433	1.49888	1.36117	Inf	0.00498895	0.997315
UniRef50_R5V2R0|unclassified	0.365359	0.510334	0.504383	0.317563	NA	0.00498895	0.997315
UniRef50_J9GYZ2	0.383744	0.671114	0.277003	0.969539	Inf	0.00499061	0.997315
UniRef50_J9GYZ2|unclassified	0.383744	0.671114	0.277003	0.969539	Inf	0.00499061	0.997315
UniRef50_D4KPI6: Carbohydrate ABC transporter substrate-binding protein, CUT1 family (TC 3.A.1.1.-)	0.646494	0.277918	1.03882	1.01029	NA	0.00499616	0.997315
UniRef50_R7FZK0: ABC-type transporter integral membrane subunit	0.675093	0.56236	0.387852	0.623475	NA	0.00499616	0.997315
UniRef50_R7FZK0: ABC-type transporter integral membrane subunit|unclassified	0.675093	0.56236	0.387852	0.623475	NA	0.00499616	0.997315
UniRef50_D4JJS9: MobA/MobL family|g__Dorea.s__Dorea_formicigenerans	1.09167	0.891085	1.23281	1.6269	NA	0.00502985	0.997315
UniRef50_E2NDU7|unclassified	1.44675	2.5131	1.55098	1.10596	NA	0.00502985	0.997315
UniRef50_R6WQN5|g__Parabacteroides.s__Parabacteroides_merdae	2.84877	3.70743	2.68254	1.78761	Inf	0.00503973	0.997315
UniRef50_R7FJS3	0.15664	0.307511	0.464978	0.24283	Inf	0.00503973	0.997315
UniRef50_R6XC85: Polysaccharide export protein|g__Bacteroides.s__Bacteroides_vulgatus	2.13867	2.30443	0.82246	0.421751	-Inf	0.00503973	0.997315
UniRef50_T3K3H6: Branched-chain amino acid transport family protein	0.220541	0.579649	0.385017	0.336658	-Inf	0.00503973	0.997315
UniRef50_T3K3H6: Branched-chain amino acid transport family protein|unclassified	0.220541	0.579649	0.385017	0.336658	-Inf	0.00503973	0.997315
UniRef50_C1GX30: Ketol-acid reductoisomerase	0.175508	0.255493	0.192968	0.109405	NA	0.00504681	0.997315
UniRef50_C1GX30: Ketol-acid reductoisomerase|unclassified	0.175508	0.255493	0.192968	0.109405	NA	0.00504681	0.997315
UniRef50_T5S055: Electron transport complex subunit D|unclassified	0.330483	0.242158	0.159219	0.473934	-Inf	0.00504681	0.997315
UniRef50_E1WNB3	0.648504	1.22404	1.66937	1.35221	NA	0.0050528	0.997315
UniRef50_A5ZN32	1.26223	0.718632	0.320707	2.07322	-Inf	0.0050528	0.997315
UniRef50_C4ZGA0|unclassified	0.650785	0.537517	0.333858	0.847494	-Inf	0.0050528	0.997315
UniRef50_UPI0003B3B328: ABC transporter ATP-binding protein	0.181319	0.304597	0.25747	0.15697	NA	0.00505614	0.997315
UniRef50_UPI0003B3B328: ABC transporter ATP-binding protein|unclassified	0.181319	0.304597	0.25747	0.15697	NA	0.00505614	0.997315
UniRef50_B2UQP8: Carbon starvation protein CstA|unclassified	0.0973578	0.486156	0.503991	0.284433	Inf	0.00507475	0.997315
UniRef50_D3IKG5	0.177233	0.492695	0.389179	0.237648	NA	0.00507475	0.997315
UniRef50_D3IKG5|unclassified	0.177233	0.492695	0.389179	0.237648	NA	0.00507475	0.997315
UniRef50_R5JLJ6: D-proline reductase proprotein PrdA|g__Coprococcus.s__Coprococcus_comes	0.869374	0.433295	0.511287	0.460014	NA	0.00507475	0.997315
UniRef50_R9GWD6: Beta-glucosidase	0.216731	0.363807	0.424014	0.334383	NA	0.00507475	0.997315
UniRef50_R9GWD6: Beta-glucosidase|unclassified	0.216731	0.363807	0.424014	0.334383	NA	0.00507475	0.997315
UniRef50_D4M3X8: Multimeric flavodoxin WrbA|g__Roseburia.s__Roseburia_intestinalis	0.480494	0.152802	0.156236	0.342125	-Inf	0.00507475	0.997315
UniRef50_R5LQX2: UDP-N-acetylenolpyruvoylglucosamine reductase	0.341419	0.576638	0.428912	0.360288	NA	0.00507591	0.997315
UniRef50_C3Q758	3.88387	2.28554	3.89155	4.38187	NA	0.00509006	0.997315
UniRef50_D4KSL4: Recombinase	1.68578	2.30282	2.48932	2.16602	NA	0.00509006	0.997315
UniRef50_A7UZN3	17.8663	16.4278	20.7644	30.9264	-Inf	0.00509741	0.997315
UniRef50_A7UZN3|g__Bacteroides.s__Bacteroides_uniformis	17.8663	16.4278	20.7644	30.9264	-Inf	0.00509741	0.997315
UniRef50_A6BHJ4	1.47951	0.974673	1.34298	1.75925	NA	0.00509951	0.997315
UniRef50_K1S6U4	0.736798	1.31328	1.36835	0.684672	Inf	0.00510518	0.997315
UniRef50_K1S6U4|unclassified	0.736798	1.31328	1.36835	0.684672	Inf	0.00510518	0.997315
UniRef50_E6MKF5: Integrase core domain protein	0.937397	0.600104	0.835203	1.35122	NA	0.00510518	0.997315
UniRef50_K1SCD2: Leucyl-tRNA synthetase	0.705772	0.932547	0.83715	0.696709	NA	0.00510518	0.997315
UniRef50_K1SCD2: Leucyl-tRNA synthetase|unclassified	0.705772	0.932547	0.83715	0.696709	NA	0.00510518	0.997315
UniRef50_K1T4C1: Efflux protein, MATE family (Fragment)	1.86979	2.75366	2.29397	1.57187	NA	0.00510518	0.997315
UniRef50_K1T4C1: Efflux protein, MATE family (Fragment)|unclassified	1.86979	2.75366	2.29397	1.57187	NA	0.00510518	0.997315
UniRef50_R6HY51	9.151	11.1821	9.66885	5.42898	NA	0.00510518	0.997315
UniRef50_R7D777|g__Blautia.s__Ruminococcus_torques	2.71247	1.19626	2.56902	2.97382	NA	0.00510801	0.997315
UniRef50_R6S3R3|unclassified	0.24083	0.436639	0.446867	0.166621	NA	0.00511097	0.997315
UniRef50_R5TH16: Sugar ABC transporter permease protein	0.573466	0.221368	0.250869	0.446585	NA	0.0051274	0.997315
UniRef50_C9PWQ7: Putative excinuclease ABC, C subunit (Fragment)	0.582951	0.654462	0.543185	0.301239	NA	0.00514007	0.997315
UniRef50_C9PWQ7: Putative excinuclease ABC, C subunit (Fragment)|unclassified	0.582951	0.654462	0.543185	0.301239	NA	0.00514007	0.997315
UniRef50_F6CPZ3: Sarcosine oxidase	0.191001	0.0937223	0.0441212	0.190135	NA	0.00514007	0.997315
UniRef50_F6CPZ3: Sarcosine oxidase|unclassified	0.191001	0.0937223	0.0441212	0.190135	NA	0.00514007	0.997315
UniRef50_D4ILW9: Thiol:disulfide interchange protein|g__Alistipes.s__Alistipes_putredinis	4.10491	4.38839	3.88516	3.24228	Inf	0.00515612	0.997315
UniRef50_R7JIZ1|g__Alistipes.s__Alistipes_putredinis	3.53311	4.02936	3.56112	3.08807	Inf	0.00515612	0.997315
UniRef50_D4L1E3: Bacterial Ig-like domain (Group 2)	1.10509	0.634819	1.16384	1.67255	NA	0.00517476	0.997315
UniRef50_R5P4C7: Glutamine amidotransferase subunit PdxT	0.654237	0.514005	0.435696	0.637053	NA	0.00517476	0.997315
UniRef50_R5P4C7: Glutamine amidotransferase subunit PdxT|unclassified	0.654237	0.514005	0.435696	0.637053	NA	0.00517476	0.997315
UniRef50_Q9RY65: 50S ribosomal protein L27|g__Bacteroides.s__Bacteroides_caccae	1.58704	2.20249	1.99857	1.60053	Inf	0.00517791	0.997315
UniRef50_R6YE17	0.112226	0.393298	0.48841	0.441456	Inf	0.00517791	0.997315
UniRef50_R6YE17|unclassified	0.112226	0.393298	0.48841	0.441456	Inf	0.00517791	0.997315
UniRef50_R6KYE9|unclassified	1.812	0.900449	1.16018	1.80614	NA	0.00517791	0.997315
UniRef50_R7IJW0: Aminopeptidase P domain protein|g__Coprococcus.s__Coprococcus_comes	0.726824	0.444831	0.304863	0.49916	NA	0.00517791	0.997315
UniRef50_D4JMA7: dTDP-4-dehydrorhamnose 3,5-epimerase|g__Dorea.s__Dorea_formicigenerans	0.262679	0.166742	0.227793	0.389974	-Inf	0.00517791	0.997315
UniRef50_R5T7P2|unclassified	0.617864	0.497308	0.224913	0.677085	-Inf	0.00517791	0.997315
UniRef50_Q4BYX8: Glycine--tRNA ligase	0.250134	0.0996328	0.11056	0.13401	NA	0.00518251	0.997315
UniRef50_Q4BYX8: Glycine--tRNA ligase|unclassified	0.250134	0.0996328	0.11056	0.13401	NA	0.00518251	0.997315
UniRef50_Q5WLZ8: tRNA-specific adenosine deaminase|g__Flavonifractor.s__Flavonifractor_plautii	0.380039	0.179634	0.13569	0.390461	NA	0.00518251	0.997315
UniRef50_Q8FE91|g__Clostridium.s__Clostridium_hathewayi	0.328141	0.354538	0.0737938	0.259438	NA	0.00518251	0.997315
UniRef50_R7CF68	1.0066	0.494	0.99514	1.98072	NA	0.00518251	0.997315
UniRef50_F4GM06: Xenobiotic-transporting ATPase	0.245073	0.1506	0.146628	0.307422	-Inf	0.00518251	0.997315
UniRef50_F4GM06: Xenobiotic-transporting ATPase|unclassified	0.245073	0.1506	0.146628	0.307422	-Inf	0.00518251	0.997315
UniRef50_R6B532|unclassified	0.670514	0.661524	0.242081	1.05883	-Inf	0.00518251	0.997315
UniRef50_P71349: L-serine dehydratase|g__Akkermansia.s__Akkermansia_muciniphila	0.500773	2.81195	1.62726	0.832673	Inf	0.00518681	0.997315
UniRef50_I9UD21	1.85791	1.80694	4.77681	5.99544	-Inf	0.00518681	0.997315
UniRef50_R5TCX3: Sugar ABC transporter sugar-binding protein|g__Clostridium.s__Clostridium_hathewayi	0.110413	0.0757886	0.0576183	0.151157	NA	0.00518934	0.997315
UniRef50_R9MYN5	0.958147	0.515481	0.37019	1.40486	NA	0.00518934	0.997315
UniRef50_R7H278|g__Dorea.s__Dorea_formicigenerans	0.840006	0.643133	0.330245	2.15766	-Inf	0.00518934	0.997315
UniRef50_T1BTX9	0.072371	0.187979	0.191566	0.230823	NA	0.005191	0.997315
UniRef50_T1BTX9|unclassified	0.072371	0.187979	0.191566	0.230823	NA	0.005191	0.997315
UniRef50_U3P9R3	0.246269	0.136694	0.0894633	0.167078	NA	0.005191	0.997315
UniRef50_U3P9R3|unclassified	0.246269	0.136694	0.0894633	0.167078	NA	0.005191	0.997315
UniRef50_V2Y3V8	1.13379	0.434963	0.658886	1.38054	NA	0.005191	0.997315
UniRef50_V2Y3V8|unclassified	1.13379	0.434963	0.658886	1.38054	NA	0.005191	0.997315
UniRef50_J9FH88: Polynucleotide phosphorylase/polyadenylase (Fragment)	1.93376	2.36457	2.34581	1.91993	NA	0.00519835	0.997315
UniRef50_J9FH88: Polynucleotide phosphorylase/polyadenylase (Fragment)|unclassified	1.93376	2.36457	2.34581	1.91993	NA	0.00519835	0.997315
UniRef50_R5ATH1: Phosphate acetyltransferase	1.49283	1.44079	1.12199	2.10928	NA	0.00519835	0.997315
UniRef50_R5ATH1: Phosphate acetyltransferase|unclassified	1.49283	1.44079	1.12199	2.10928	NA	0.00519835	0.997315
UniRef50_R5GHT9: Threonine--tRNA ligase	1.26363	1.43965	1.51577	0.95167	NA	0.00519835	0.997315
UniRef50_R5GHT9: Threonine--tRNA ligase|unclassified	1.26363	1.43965	1.51577	0.95167	NA	0.00519835	0.997315
UniRef50_R5R738: Hydroxyethylthiazole kinase|unclassified	0.693043	0.928077	1.01872	0.785527	NA	0.00519835	0.997315
UniRef50_R5TBY5|unclassified	0.449504	0.702409	0.547882	0.685001	NA	0.00519835	0.997315
UniRef50_UPI00047399B5: macrolide ABC transporter ATP-binding protein, partial	0.278721	0.355117	0.317653	0.261036	NA	0.00519835	0.997315
UniRef50_UPI00047399B5: macrolide ABC transporter ATP-binding protein, partial|unclassified	0.278721	0.355117	0.317653	0.261036	NA	0.00519835	0.997315
UniRef50_W7DC17: DNA topoisomerase I|unclassified	1.19183	1.44637	1.21634	1.08077	NA	0.00519835	0.997315
UniRef50_X0SNX8: Marine sediment metagenome DNA, contig: S01H1_L02528 (Fragment)	0.602907	0.820884	0.953771	0.807177	NA	0.00519835	0.997315
UniRef50_X0SNX8: Marine sediment metagenome DNA, contig: S01H1_L02528 (Fragment)|unclassified	0.602907	0.820884	0.953771	0.807177	NA	0.00519835	0.997315
UniRef50_A6LIB3: 4-hydroxy-3-methylbut-2-enyl diphosphate reductase|unclassified	0.382192	0.707603	0.657666	0.438292	Inf	0.00519908	0.997315
UniRef50_G9YU71|g__Lachnospiraceae_noname.s__Lachnospiraceae_bacterium_7_1_58FAA	0.183374	0.354189	0.422169	0.444257	Inf	0.00519908	0.997315
UniRef50_R5BQE2	0.462284	0.317055	0.445236	0.495997	NA	0.00519908	0.997315
UniRef50_Q038K0: tRNA (guanine-N(1)-)-methyltransferase	0.0711318	0.215498	0.231314	0.149895	NA	0.00519969	0.997315
UniRef50_R6JJS1: TonB-dependent receptor|g__Bacteroides.s__Bacteroides_caccae	1.30983	1.79291	1.49209	1.47033	Inf	0.0052016	0.997315
UniRef50_UPI0001C370EA: hypothetical protein	0.233349	0.445301	0.480868	0.303707	Inf	0.0052016	0.997315
UniRef50_UPI0001C370EA: hypothetical protein|unclassified	0.233349	0.445301	0.480868	0.303707	Inf	0.0052016	0.997315
UniRef50_E5X0M4: Carboxynorspermidine decarboxylase	1.11453	1.39461	1.82585	1.32199	NA	0.0052016	0.997315
UniRef50_F2I480: V-type ATP synthase subunit D|unclassified	0.422603	0.636858	0.702767	0.488058	NA	0.00522187	0.997315
UniRef50_F9MXE2: Integrase core domain protein	0.486022	0.298018	0.401445	0.54667	NA	0.00522187	0.997315
UniRef50_F9MXE2: Integrase core domain protein|unclassified	0.486022	0.298018	0.401445	0.54667	NA	0.00522187	0.997315
UniRef50_K1TYE1: Mobilization nuclease domain protein (Fragment)	0.672075	0.961417	0.908527	0.832195	NA	0.00522187	0.997315
UniRef50_K1TYE1: Mobilization nuclease domain protein (Fragment)|unclassified	0.672075	0.961417	0.908527	0.832195	NA	0.00522187	0.997315
UniRef50_R6N8V3: Germination protein Ger(X)C family	0.340484	0.202413	0.59349	0.405183	NA	0.00524433	0.997315
UniRef50_R6N8V3: Germination protein Ger(X)C family|g__Clostridium.s__Clostridium_leptum	0.340484	0.202413	0.59349	0.405183	NA	0.00524433	0.997315
UniRef50_H1C8T2|g__Lachnospiraceae_noname.s__Lachnospiraceae_bacterium_7_1_58FAA	2.64917	4.24577	3.59661	2.65806	NA	0.00524599	0.997315
UniRef50_A7VHW0|unclassified	1.37919	0.900217	1.01699	1.07486	NA	0.00525469	0.997315
UniRef50_R6ZI97: Acetyltransferase	0.87676	1.06557	1.17667	0.683137	NA	0.00525469	0.997315
UniRef50_R6ZI97: Acetyltransferase|unclassified	0.87676	1.06557	1.17667	0.683137	NA	0.00525469	0.997315
UniRef50_C3ICC0: Transcriptional regulator, GntR|unclassified	0.366569	0.178214	0.13074	0.16924	NA	0.0052755	0.997315
UniRef50_A4IQZ4: 4-hydroxy-3-methylbut-2-en-1-yl diphosphate synthase|g__Clostridium.s__Clostridium_leptum	0.375774	0.269312	0.607821	0.365249	NA	0.0052882	0.997315
UniRef50_D4K1D0: Transcriptional regulators	1.05647	0.74769	1.38497	2.13387	NA	0.0052882	0.997315
UniRef50_N1ZFE1	0.0970961	0.262929	0.418243	0.137288	NA	0.00529356	0.997315
UniRef50_N1ZFE1|unclassified	0.0970961	0.262929	0.418243	0.137288	NA	0.00529356	0.997315
UniRef50_D4MWC6: His Kinase A (Phosphoacceptor) domain./Histidine kinase-, DNA gyrase B-, and HSP90-like ATPase./HAMP domain|g__Dorea.s__Dorea_formicigenerans	1.02857	1.03283	0.962876	2.00453	NA	0.00532343	0.997315
UniRef50_G4KRK6: Single-stranded-DNA-specific exonuclease RecJ|g__Lachnospiraceae_noname.s__Lachnospiraceae_bacterium_7_1_58FAA	0.129437	0.174991	0.278323	0.211956	NA	0.00532343	0.997315
UniRef50_C2KV36	0.184175	0.533066	0.352659	0.185525	Inf	0.00533776	0.997315
UniRef50_C2KV36|unclassified	0.184175	0.533066	0.352659	0.185525	Inf	0.00533776	0.997315
UniRef50_F9ZBE6: DNA primase|g__Bacteroides.s__Bacteroides_caccae	9.14358	10.9637	4.8501	5.30909	Inf	0.00533776	0.997315
UniRef50_R5VT82	0.99893	1.10371	0.987618	1.03742	NA	0.00533776	0.997315
UniRef50_R7JLN6: Transporter major facilitator family protein	2.8977	3.56164	2.87467	2.97392	Inf	0.00534942	0.997315
UniRef50_E5FRZ9: Deoxyuridine 5'-triphosphate nucleotidohydrolase (Fragment)	0.521099	0.34398	0.313456	0.421528	NA	0.00535093	0.997315
UniRef50_E5FRZ9: Deoxyuridine 5'-triphosphate nucleotidohydrolase (Fragment)|unclassified	0.521099	0.34398	0.313456	0.421528	NA	0.00535093	0.997315
UniRef50_H1CMH8: Glycerol kinase|g__Lachnospiraceae_noname.s__Lachnospiraceae_bacterium_7_1_58FAA	0.162156	0.297215	0.372039	0.32639	NA	0.00535093	0.997315
UniRef50_K1V0T9: Esterase	2.67977	3.63141	4.04106	2.98039	NA	0.00535093	0.997315
UniRef50_K1V0T9: Esterase|unclassified	2.67977	3.63141	4.04106	2.98039	NA	0.00535093	0.997315
UniRef50_K1VC62	0.522654	0.67829	0.959925	0.536443	NA	0.00535675	0.997315
UniRef50_K1VC62|unclassified	0.522654	0.67829	0.959925	0.536443	NA	0.00535675	0.997315
UniRef50_R6F9A6: Transporter AcrB/D/F family	0.54312	0.856218	1.05453	0.793243	NA	0.00535675	0.997315
UniRef50_R6F9A6: Transporter AcrB/D/F family|unclassified	0.54312	0.856218	1.05453	0.793243	NA	0.00535675	0.997315
UniRef50_R6TLT0|g__Lachnospiraceae_noname.s__Lachnospiraceae_bacterium_7_1_58FAA	0.202244	0.33397	0.400062	0.313918	NA	0.0053716	0.997315
UniRef50_B2UPF2: Thiamine-monophosphate kinase	0.461605	2.90512	1.84633	0.889692	Inf	0.00538063	0.997315
UniRef50_D4JPD6|unclassified	0.956443	0.554012	0.305857	1.05957	NA	0.00538063	0.997315
UniRef50_R6A3P4: ABC transporter ATP-binding protein|unclassified	0.386094	0.457311	0.475501	0.253409	-Inf	0.00538063	0.997315
UniRef50_F4KJU4: Peptide deformylase	1.13845	1.77062	2.47078	2.29756	Inf	0.00538639	0.997315
UniRef50_A6EE08: GTP-binding protein HflX (Fragment)	0.565124	0.70267	0.574364	0.398582	NA	0.00538639	0.997315
UniRef50_A6EE08: GTP-binding protein HflX (Fragment)|unclassified	0.565124	0.70267	0.574364	0.398582	NA	0.00538639	0.997315
UniRef50_B9Y5H9: Acetyltransferase, GNAT family|unclassified	0.647819	0.483936	1.1907	1.29694	NA	0.00539627	0.997315
UniRef50_D4JDF1: ABC-type cobalt transport system, permease component CbiQ and related transporters|unclassified	2.01888	1.49333	1.22342	1.57635	NA	0.0054022	0.997315
UniRef50_J9C2S2: Glycoside hydrolase family 2 protein (Fragment)	0.71831	0.338678	0.331853	3.84036	NA	0.0054022	0.997315
UniRef50_J9C2S2: Glycoside hydrolase family 2 protein (Fragment)|unclassified	0.71831	0.338678	0.331853	3.84036	NA	0.0054022	0.997315
UniRef50_R6EPE0|unclassified	1.3886	0.965481	1.79453	1.86285	NA	0.0054022	0.997315
UniRef50_C9L7K7|unclassified	5.00042	6.73993	7.73897	6.18582	NA	0.00540516	0.997315
UniRef50_K2FSL8	0.616004	0.825151	0.756364	0.434053	NA	0.00540516	0.997315
UniRef50_K2FSL8|unclassified	0.616004	0.825151	0.756364	0.434053	NA	0.00540516	0.997315
UniRef50_R4K6U5: Glutamine amidotransferase of anthranilate synthase or aminodeoxychorismate synthase	1.27474	0.587708	1.39165	1.47256	NA	0.00540516	0.997315
UniRef50_R5CZM4	1.67607	2.80238	2.66791	2.03526	Inf	0.00541127	0.997315
UniRef50_F4FLJ7: 5-methylcytosine-specific restriction enzyme subunit McrC	0.228044	0.139892	0.202914	0.211339	NA	0.00541127	0.997315
UniRef50_F4FLJ7: 5-methylcytosine-specific restriction enzyme subunit McrC|unclassified	0.228044	0.139892	0.202914	0.211339	NA	0.00541127	0.997315
UniRef50_R5CNK7	1.88147	1.04624	1.60166	1.739	NA	0.00541127	0.997315
UniRef50_S0FBY6: Peptidase family M49 (Fragment)	0.734066	0.819937	1.29267	1.5108	NA	0.00541127	0.997315
UniRef50_R5DKA2|g__Parabacteroides.s__Parabacteroides_merdae	1.61806	2.06829	3.31402	2.42722	Inf	0.00542744	0.997315
UniRef50_R7HRE0: 4-hydroxy-3-methylbut-2-en-1-yl diphosphate synthase	0.237353	0.385239	0.334301	0.265755	NA	0.00545119	0.997315
UniRef50_R7HRE0: 4-hydroxy-3-methylbut-2-en-1-yl diphosphate synthase|unclassified	0.237353	0.385239	0.334301	0.265755	NA	0.00545119	0.997315
UniRef50_F4KUD4: ATPase AAA-2 domain protein|g__Alistipes.s__Alistipes_putredinis	3.28741	3.58289	3.0321	2.61777	Inf	0.00545953	0.997315
UniRef50_Q8A255: Phospho-N-acetylmuramoyl-pentapeptide-transferase|g__Alistipes.s__Alistipes_putredinis	3.10239	3.95297	3.00966	2.7643	Inf	0.00545953	0.997315
UniRef50_R6XTX3: Transporter NhaC family (TC 2.A.35)	1.51071	1.96293	2.25635	1.64022	Inf	0.00545953	0.997315
UniRef50_R7N316: Pseudaminic acid CMP-transferase	0.502066	1.12297	0.828709	0.73402	Inf	0.00545953	0.997315
UniRef50_R7N316: Pseudaminic acid CMP-transferase|unclassified	0.502066	1.12297	0.828709	0.73402	Inf	0.00545953	0.997315
UniRef50_R6AKY3|unclassified	0.0710783	0.445636	0.463049	0.395619	Inf	0.00548651	0.997315
UniRef50_A7M3P6|g__Bacteroides.s__Bacteroides_ovatus	22.1222	11.6477	8.82325	18.7642	NA	0.00549267	0.997315
UniRef50_D4LJA6	0.531073	0.316101	0.515623	0.898585	-Inf	0.00549267	0.997315
UniRef50_D4LJA6|unclassified	0.531073	0.316101	0.515623	0.898585	-Inf	0.00549267	0.997315
UniRef50_A1T9L9: Malate dehydrogenase	0.945597	3.39365	2.44044	1.21786	NA	0.00549395	0.997315
UniRef50_R5UA20: Alpha amylase catalytic domain protein|unclassified	0.297634	0.182147	0.135628	0.253849	NA	0.00549395	0.997315
UniRef50_T0CMH2: MatE family protein	0.193188	0.284129	0.403451	0.209749	NA	0.00549395	0.997315
UniRef50_T0CMH2: MatE family protein|unclassified	0.193188	0.284129	0.403451	0.209749	NA	0.00549395	0.997315
UniRef50_UPI000463A190: hypothetical protein	0.291507	0.224674	0.213549	0.331176	NA	0.00549395	0.997315
UniRef50_UPI000463A190: hypothetical protein|unclassified	0.291507	0.224674	0.213549	0.331176	NA	0.00549395	0.997315
UniRef50_D6D5W4: Carbohydrate-binding module 48 (Isoamylase N-terminal domain)	0.650767	0.989615	0.684629	0.635751	Inf	0.00549784	0.997315
UniRef50_D6D5W4: Carbohydrate-binding module 48 (Isoamylase N-terminal domain)|unclassified	0.650767	0.989615	0.684629	0.635751	Inf	0.00549784	0.997315
UniRef50_D0X9J8	0.163135	0.0685273	0.0753717	0.146766	NA	0.00549784	0.997315
UniRef50_D0X9J8|unclassified	0.163135	0.0685273	0.0753717	0.146766	NA	0.00549784	0.997315
UniRef50_R5VR67|g__Roseburia.s__Roseburia_inulinivorans	0.628167	0.282666	0.40716	1.59131	NA	0.00549784	0.997315
UniRef50_B2UQQ6: Non-canonical purine NTP pyrophosphatase	0.66408	3.07911	1.98622	0.839036	Inf	0.0055076	0.997315
UniRef50_P25885|g__Akkermansia.s__Akkermansia_muciniphila	0.627169	3.10641	2.07827	0.939063	Inf	0.0055076	0.997315
UniRef50_R6XAE1: Asparagine synthetase|unclassified	0.598836	0.826545	0.951157	0.608517	Inf	0.0055076	0.997315
UniRef50_W6NL75: Putative cytoplasmic protein	0.561861	0.266247	0.3845	0.547123	NA	0.0055076	0.997315
UniRef50_W6NL75: Putative cytoplasmic protein|unclassified	0.561861	0.266247	0.3845	0.547123	NA	0.0055076	0.997315
UniRef50_K6B3P2	6.68624	6.09946	5.07181	1.09533	-Inf	0.0055076	0.997315
UniRef50_R5LKM0	0.234544	0.175572	0.148005	0.254846	-Inf	0.0055076	0.997315
UniRef50_R5LKM0|unclassified	0.234544	0.175572	0.148005	0.254846	-Inf	0.0055076	0.997315
UniRef50_K1UKY6	0.662401	1.89986	1.66346	0.918601	Inf	0.00550918	0.997315
UniRef50_K1UKY6|unclassified	0.662401	1.89986	1.66346	0.918601	Inf	0.00550918	0.997315
UniRef50_P62126: 30S ribosomal protein S12, chloroplastic|g__Akkermansia.s__Akkermansia_muciniphila	1.0278	4.55348	3.967	1.87	Inf	0.00550918	0.997315
UniRef50_Q64XK5: tRNA dimethylallyltransferase 2|g__Bacteroides.s__Bacteroides_caccae	1.3301	1.62505	1.3269	1.3359	Inf	0.00550918	0.997315
UniRef50_R5W4K6|g__Alistipes.s__Alistipes_shahii	0.720146	1.06531	1.08704	1.04164	Inf	0.00550918	0.997315
UniRef50_T3QTS7: ThiC family protein	0.0398327	0.0888944	0.088632	0.068218	Inf	0.00550918	0.997315
UniRef50_T3QTS7: ThiC family protein|unclassified	0.0398327	0.0888944	0.088632	0.068218	Inf	0.00550918	0.997315
UniRef50_X2GQ04: ABC transporter	0.368766	0.234859	0.144887	0.259488	NA	0.00550918	0.997315
UniRef50_X2GQ04: ABC transporter|unclassified	0.368766	0.234859	0.144887	0.259488	NA	0.00550918	0.997315
UniRef50_B9L5K2: 3-isopropylmalate dehydratase small subunit|g__Roseburia.s__Roseburia_intestinalis	0.461407	0.24505	0.66296	1.03169	-Inf	0.00550918	0.997315
UniRef50_N1ZUF0	0.205095	0.149899	0.136475	0.26145	-Inf	0.00550918	0.997315
UniRef50_F0SXE2: Phage protein	0.0709225	0.391145	0.386358	0.207204	NA	0.00550949	0.997315
UniRef50_F0SXE2: Phage protein|unclassified	0.0709225	0.391145	0.386358	0.207204	NA	0.00550949	0.997315
UniRef50_F3ZR16: Acriflavin resistance protein	0.267003	0.433245	0.551711	0.342323	NA	0.00551808	0.997315
UniRef50_F3ZR16: Acriflavin resistance protein|unclassified	0.267003	0.433245	0.551711	0.342323	NA	0.00551808	0.997315
UniRef50_B9E4F2	1.08746	1.06282	1.19545	1.09281	NA	0.00552038	0.997315
UniRef50_D4MHN8: Plasmid recombination enzyme|unclassified	3.75775	3.95148	4.36094	3.73073	NA	0.00552038	0.997315
UniRef50_G0VMY7: Transposase and inactivated derivatives	21.0672	16.3614	13.2521	20.8524	NA	0.00552038	0.997315
UniRef50_K1UKH0: Orotidine 5'-phosphate decarboxylase, subfamily 2	1.09989	1.56063	1.80152	1.1588	NA	0.00552038	0.997315
UniRef50_K1UKH0: Orotidine 5'-phosphate decarboxylase, subfamily 2|unclassified	1.09989	1.56063	1.80152	1.1588	NA	0.00552038	0.997315
UniRef50_R6TV68	0.858909	1.11004	1.18416	0.896085	NA	0.00552038	0.997315
UniRef50_R6TV68|unclassified	0.858909	1.11004	1.18416	0.896085	NA	0.00552038	0.997315
UniRef50_R6Y3X2	1.35865	1.70037	1.85212	1.55456	NA	0.00552038	0.997315
UniRef50_R6Y3X2|unclassified	1.35865	1.70037	1.85212	1.55456	NA	0.00552038	0.997315
UniRef50_S8AWY0: Methylenetetrahydrofolate reductase	0.37543	0.691876	0.6947	0.487174	NA	0.00552038	0.997315
UniRef50_S8AWY0: Methylenetetrahydrofolate reductase|unclassified	0.37543	0.691876	0.6947	0.487174	NA	0.00552038	0.997315
UniRef50_Z0G6V5: Xanthine phosphoribosyltransferase	0.428002	0.548014	0.606113	0.448591	NA	0.00552038	0.997315
UniRef50_Z0G6V5: Xanthine phosphoribosyltransferase|unclassified	0.428002	0.548014	0.606113	0.448591	NA	0.00552038	0.997315
UniRef50_F0R8X8: Tetracycline regulation of excision, RteC|g__Bacteroides.s__Bacteroides_stercoris	6.20435	7.9001	7.64972	6.6868	NA	0.00555042	0.997315
UniRef50_C4ZEP7|g__Faecalibacterium.s__Faecalibacterium_prausnitzii	5.8346	7.30113	5.95298	3.65117	NA	0.00555951	0.997315
UniRef50_M9R693: RNA polymerase beta subunit (Fragment)	0.240649	0.287201	0.320675	0.225465	NA	0.00555951	0.997315
UniRef50_M9R693: RNA polymerase beta subunit (Fragment)|unclassified	0.240649	0.287201	0.320675	0.225465	NA	0.00555951	0.997315
UniRef50_T3CYV6: Polyprenyl synthetase family protein	0.849716	1.22933	1.22933	0.985646	NA	0.00555951	0.997315
UniRef50_T3CYV6: Polyprenyl synthetase family protein|unclassified	0.849716	1.22933	1.22933	0.985646	NA	0.00555951	0.997315
UniRef50_R7JPN6: Aldose 1-epimerase	3.36526	3.74013	2.68727	2.44925	Inf	0.00556732	0.997315
UniRef50_R6HLK4	0.283677	0.586801	0.492786	0.409867	Inf	0.00559557	0.997315
UniRef50_R6HLK4|unclassified	0.283677	0.586801	0.492786	0.409867	Inf	0.00559557	0.997315
UniRef50_R6JBC2: GSCFA family protein	2.20903	2.12516	2.22651	1.18017	NA	0.00559557	0.997315
UniRef50_D5H2X6: Acetyltransferase, GNAT family|unclassified	0.146661	0.129455	0.109905	0.206123	NA	0.00560463	0.997315
UniRef50_X1N3F7: Marine sediment metagenome DNA, contig: S06H3_S15667 (Fragment)	0.109139	0.145166	0.224666	0.0279215	NA	0.00561304	0.997315
UniRef50_X1N3F7: Marine sediment metagenome DNA, contig: S06H3_S15667 (Fragment)|unclassified	0.109139	0.145166	0.224666	0.0279215	NA	0.00561304	0.997315
[truncated: 16,051 more rows]
